# Supplementary material for: The BMAL1/HIF2A heterodimer modulates circadian variations of myocardial injury
Source: Research Square preprint supplement (doi:10.21203/rs.3.rs-3938716/v1), 2024-02-28
Supplement: Supplementary file 1 [file a063e1a4023e5df950d2a5e3.xlsx]

## Sheet: Supplementary Table 1
Supplementary Table 1. Full gene list for mouse RNA-seq analysis.
ENSEMBL_ID	Gene_symbol	Category	Surgery_ZT8_1	Surgery_ZT8_2	Surgery_ZT8_3	Surgery_ZT20_1	Surgery_ZT20_2	Surgery_ZT20_3	BaseMean	LfcSE	Stat	Pvalue	Padj	Log2FoldChange
ENSMUSG00000030089	Slc41a3	protein_coding	178.655	153.668	178.681	620.385	557.189	571.734	376.719	0.110618	12.4621	1.2e-35	1.6e-31	-1.38788
ENSMUSG00000055866	Per2	protein_coding	293.434	290.696	240.532	63.1956	44.3333	32.5104	160.784	0.13039	-11.5499	7.39e-31	4.92e-27	1.53492
ENSMUSG00000021775	Nr1d2	protein_coding	1743.64	1608.13	1596.34	722.744	660.97	534.74	1144.43	0.104135	-10.6835	1.22e-26	5.39e-23	1.11369
ENSMUSG00000055116	Arntl	protein_coding	34.9326	46.9812	91.3038	328.439	318.394	326.225	191.046	0.132727	10.5448	5.37e-26	1.79e-22	-1.40351
ENSMUSG00000028957	Per3	protein_coding	204.605	188.904	161.009	40.0535	24.1818	43.7209	110.412	0.132741	-9.79549	1.18e-22	3.13e-19	1.3237
ENSMUSG00000090877	Hspa1b	protein_coding	3076.07	2924.58	3219.2	1019.14	1020.67	1512.29	2128.66	0.112082	-9.53579	1.49e-21	3.3e-18	1.06847
ENSMUSG00000059824	Dbp	protein_coding	204.605	157.583	110.939	23.142	17.1288	32.5104	90.9847	0.134567	-9.22211	2.91e-20	5.54e-17	1.25087
ENSMUSG00000091971	Hspa1a	protein_coding	1174.73	1127.55	1172.22	424.567	411.091	593.034	817.2	0.11118	-9.01296	2.01e-19	3.34e-16	1.00274
ENSMUSG00000023067	Cdkn1a	protein_coding	1175.73	1341.9	1722.99	2696.05	3017.69	3289.15	2207.25	0.110137	7.75761	8.65e-15	1.28e-11	-0.854308
ENSMUSG00000027204	Fbn1	protein_coding	400.228	439.47	368.161	955.944	951.152	689.444	634.066	0.113614	7.4573	8.83e-14	1.18e-10	-0.84794
ENSMUSG00000022389	Tef	protein_coding	1572.97	1417.27	1278.25	799.29	784.902	753.344	1101	0.0986847	-7.38442	1.53e-13	1.85e-10	0.729078
ENSMUSG00000007877	Tcap	protein_coding	7847.86	7337.88	6411.89	3737.44	4415.2	3443.86	5532.35	0.101023	-7.37209	1.68e-13	1.86e-10	0.744722
ENSMUSG00000029238	Clock	protein_coding	552.933	515.815	582.185	1045.84	1009.59	918.138	770.751	0.0995111	7.13597	9.61e-13	9.84e-10	-0.710594
ENSMUSG00000020120	Plek	protein_coding	531.974	563.775	413.322	878.507	1042.84	1126.65	759.512	0.112131	7.00733	2.43e-12	2.31e-09	-0.786051
ENSMUSG00000074794	Arrdc3	protein_coding	992.086	1608.13	1850.62	580.331	561.22	734.286	1054.45	0.125068	-6.81899	9.17e-12	8.13e-09	0.851775
ENSMUSG00000043613	Mmp3	protein_coding	67.8691	85.1535	82.468	239.431	219.652	160.31	142.48	0.12984	6.7139	1.89e-11	1.58e-08	-0.875536
ENSMUSG00000006014	Prg4	protein_coding	468.097	421.852	509.534	863.376	841.326	785.854	648.34	0.102509	6.68124	2.37e-11	1.85e-08	-0.685389
ENSMUSG00000005483	Dnajb1	protein_coding	1841.45	1387.9	1191.86	750.336	502.78	745.497	1069.97	0.121999	-6.66737	2.6e-11	1.93e-08	0.812953
ENSMUSG00000027832	Ptx3	protein_coding	2340.48	2614.31	1750.48	3615.5	4675.15	5990.88	3497.8	0.121245	6.44653	1.14e-10	8.01e-08	-0.780882
ENSMUSG00000056071	S100a9	protein_coding	248.521	178.137	168.863	383.624	404.038	532.498	319.28	0.124054	6.3899	1.66e-10	1.1e-07	-0.793238
ENSMUSG00000027737	Slc7a11	protein_coding	42.9172	39.151	44.1793	104.139	119.902	147.978	83.0444	0.133625	6.34538	2.22e-10	1.41e-07	-0.853291
ENSMUSG00000004098	Col5a3	protein_coding	90.8248	89.0686	85.4133	238.541	213.606	161.431	146.481	0.128427	6.07875	1.21e-09	7.33e-07	-0.783557
ENSMUSG00000026185	Igfbp5	protein_coding	668.71	902.431	814.862	1492.66	1516.4	1226.43	1103.58	0.108554	6.06669	1.31e-09	7.55e-07	-0.658721
ENSMUSG00000034235	Usp54	protein_coding	459.114	430.661	483.027	261.683	267.008	243.267	357.46	0.108664	-6.05457	1.41e-09	7.81e-07	0.658856
ENSMUSG00000026235	Epha4	protein_coding	369.288	320.06	320.054	623.945	596.485	538.103	461.322	0.107187	5.99564	2.03e-09	1.08e-06	-0.643252
ENSMUSG00000026981	Il1rn	protein_coding	138.732	211.416	172.79	331.999	334.515	446.177	272.605	0.124636	5.98023	2.23e-09	1.14e-06	-0.746062
ENSMUSG00000031502	Col4a1	protein_coding	3992.3	4502.37	4767.43	7465.09	7296.86	6256.57	5713.44	0.0959441	5.89063	3.85e-09	1.9e-06	-0.565175
ENSMUSG00000050578	Mmp13	protein_coding	127.754	87.111	55.9604	170.005	313.356	290.351	174.09	0.134417	5.84206	5.16e-09	2.45e-06	-0.781372
ENSMUSG00000025981	Coq10b	protein_coding	810.436	737.997	753.993	424.567	384.894	530.255	607.024	0.109512	-5.64786	1.62e-08	7.45e-06	0.618761
ENSMUSG00000038393	Txnip	protein_coding	6737	6309.19	6677.94	4530.5	4685.23	3911.33	5475.2	0.0912649	-5.58071	2.4e-08	1.06e-05	0.509339
ENSMUSG00000011256	Adam19	protein_coding	98.8094	134.092	133.52	233.201	233.758	265.688	183.178	0.12392	5.56552	2.61e-08	1.12e-05	-0.691223
ENSMUSG00000019122	Ccl9	protein_coding	366.293	427.725	354.416	785.049	705.303	554.919	532.284	0.114492	5.55107	2.84e-08	1.14e-05	-0.635946
ENSMUSG00000053641	Dennd4a	protein_coding	929.207	1028.69	931.692	1301.29	2106.84	1783.59	1346.89	0.115231	5.55625	2.76e-08	1.14e-05	-0.640168
ENSMUSG00000026395	Ptprc	protein_coding	135.738	154.647	135.483	246.552	283.129	263.446	203.166	0.119457	5.45622	4.86e-08	1.9e-05	-0.653138
ENSMUSG00000047945	Marcksl1	protein_coding	304.413	464.918	319.073	537.607	855.432	808.275	548.286	0.125941	5.43991	5.33e-08	2.03e-05	-0.684731
ENSMUSG00000024164	C3	protein_coding	1373.35	1539.61	1274.33	2176.24	2193.49	1997.71	1759.12	0.0955411	5.39409	6.89e-08	2.55e-05	-0.515422
ENSMUSG00000030144	Clec4d	protein_coding	66.871	60.6841	60.8692	143.303	140.053	130.042	100.304	0.130358	5.37125	7.82e-08	2.81e-05	-0.703501
ENSMUSG00000029657	Hsph1	protein_coding	2432.31	1865.55	1939.96	963.955	1223.2	1427.09	1642.01	0.113813	-5.30983	1.1e-07	3.84e-05	0.60423
ENSMUSG00000036564	Ndrg4	protein_coding	2130.89	2689.68	2585.96	1484.65	1605.07	1696.14	2032.06	0.0996701	-5.28711	1.24e-07	4.24e-05	0.527
ENSMUSG00000041559	Fmod	protein_coding	12.975	8.80898	4.90881	34.7131	66.5	38.1156	27.6702	0.123019	5.24365	1.57e-07	5.24e-05	-0.63671
ENSMUSG00000030772	Dkk3	protein_coding	15.9692	16.6392	35.3434	45.394	144.083	88.5628	57.6653	0.127615	5.23238	1.67e-07	5.42e-05	-0.651596
ENSMUSG00000052684	Jun	protein_coding	1685.75	1288.07	1161.42	730.754	724.447	933.833	1087.38	0.115045	-5.2283	1.71e-07	5.42e-05	0.601451
ENSMUSG00000020122	Egfr	protein_coding	192.628	251.545	223.842	400.535	380.864	365.461	302.479	0.114533	5.1841	2.17e-07	6.68e-05	-0.594451
ENSMUSG00000021281	Tnfaip2	protein_coding	744.563	880.898	606.729	1020.03	1533.53	1476.42	1043.7	0.11972	5.1775	2.25e-07	6.68e-05	-0.619686
ENSMUSG00000028410	Dnaja1	protein_coding	1994.15	1549.4	1714.16	958.614	819.159	1265.66	1383.52	0.115428	-5.17671	2.26e-07	6.68e-05	0.597447
ENSMUSG00000048621	Gm6377	protein_coding	51.8999	71.4506	34.3617	109.48	152.144	135.647	92.4971	0.13434	5.16907	2.35e-07	6.81e-05	-0.694899
ENSMUSG00000027313	Chac1	protein_coding	110.786	105.708	124.684	45.394	34.2576	60.5366	80.2277	0.134022	-5.15985	2.47e-07	7e-05	0.693584
ENSMUSG00000002699	Lcp2	protein_coding	123.761	153.668	78.5409	220.739	276.076	257.841	185.104	0.130439	5.14471	2.68e-07	7.43e-05	-0.671405
ENSMUSG00000032000	Birc3	protein_coding	729.592	837.832	881.622	1064.53	1599.02	1520.14	1105.46	0.114547	5.13374	2.84e-07	7.56e-05	-0.588026
ENSMUSG00000064302	Clasp1	protein_coding	2785.63	2862.92	2728.32	3901.21	3869.09	3932.63	3346.63	0.0837347	5.13482	2.82e-07	7.56e-05	-0.429982
ENSMUSG00000051439	Cd14	protein_coding	190.632	283.845	361.288	508.235	537.038	547.071	404.685	0.124699	5.11752	3.1e-07	8.08e-05	-0.638206
ENSMUSG00000032691	Nlrp3	protein_coding	69.8652	98.8563	61.851	134.402	211.591	173.762	125.055	0.132812	5.07054	3.97e-07	0.000101513	-0.674024
ENSMUSG00000031770	Herpud1	protein_coding	3238.75	2995.05	3302.65	2334.68	2105.83	2236.49	2702.24	0.0891459	-5.04292	4.58e-07	0.000115113	0.449588
ENSMUSG00000012428	Steap4	protein_coding	1027.02	1073.72	1050.49	1366.27	1733.03	1708.48	1326.5	0.100658	5.02923	4.92e-07	0.000121355	-0.506282
ENSMUSG00000039376	Synpo2l	protein_coding	1253.58	1139.29	1235.06	688.031	861.477	828.454	1000.98	0.101333	-4.99284	5.95e-07	0.000143955	0.506021
ENSMUSG00000003949	Hlf	protein_coding	255.507	354.317	325.945	154.874	166.25	196.183	242.179	0.122219	-4.96819	6.76e-07	0.000160592	0.607814
ENSMUSG00000031503	Col4a2	protein_coding	2848.5	2795.38	2857.91	4170.02	4205.62	3671.43	3424.81	0.088798	4.96084	7.02e-07	0.000163863	-0.440534
ENSMUSG00000044162	Tnip3	protein_coding	111.784	106.687	59.8875	153.984	225.697	245.509	150.591	0.133295	4.93462	8.03e-07	0.000184249	-0.6572
ENSMUSG00000020400	Tnip1	protein_coding	896.271	1083.5	862.969	1206.95	1854.95	1779.1	1280.62	0.116711	4.92148	8.59e-07	0.000193718	-0.574296
ENSMUSG00000056054	S100a8	protein_coding	178.655	110.602	97.1944	223.41	254.917	343.041	201.303	0.131962	4.89777	9.69e-07	0.000214978	-0.645792
ENSMUSG00000038526	Car14	protein_coding	902.259	955.285	1048.52	615.044	594.47	706.26	803.64	0.101844	-4.88722	1.02e-06	0.0002231	0.497853
ENSMUSG00000024737	Slc15a3	protein_coding	84.8363	122.347	100.14	143.303	255.924	262.325	161.479	0.13284	4.78298	1.73e-06	0.000370695	-0.634923
ENSMUSG00000025017	Pik3ap1	protein_coding	40.921	68.5143	39.2705	104.139	129.977	110.984	82.301	0.134281	4.75046	2.03e-06	0.00042869	-0.639058
ENSMUSG00000078122	F630028O10Rik	antisense_RNA	23.9538	13.7029	11.7811	57.8551	48.3636	56.0524	35.2848	0.130457	4.74198	2.12e-06	0.00044004	-0.618671
ENSMUSG00000042677	Zc3h12a	protein_coding	196.621	242.736	175.735	280.375	403.03	466.356	294.142	0.126715	4.73333	2.21e-06	0.00045217	-0.599765
ENSMUSG00000020658	Efr3b	protein_coding	150.709	138.007	118.793	216.289	251.894	246.63	187.054	0.122128	4.68996	2.73e-06	0.000542732	-0.573624
ENSMUSG00000055489	Ano5	protein_coding	49.9037	77.3233	50.0698	139.742	109.826	134.526	93.5651	0.133362	4.691	2.72e-06	0.000542732	-0.627062
ENSMUSG00000030142	Clec4e	protein_coding	108.79	154.647	88.3586	180.686	252.902	276.899	177.047	0.131529	4.63391	3.59e-06	0.000691995	-0.609411
ENSMUSG00000042487	Leo1	protein_coding	117.773	103.75	116.83	186.916	210.583	201.789	156.274	0.123556	4.63545	3.56e-06	0.000691995	-0.573858
ENSMUSG00000046768	Rhoj	protein_coding	638.768	746.806	799.154	1231.87	973.318	1121.05	918.494	0.106306	4.60186	4.19e-06	0.000796028	-0.489305
ENSMUSG00000035042	Ccl5	protein_coding	27.9461	32.2996	13.7447	44.5039	83.6288	105.378	51.2503	0.130119	4.59505	4.33e-06	0.000801121	-0.591352
ENSMUSG00000052748	Swt1	protein_coding	473.087	281.887	309.255	178.016	147.106	228.694	269.674	0.129735	-4.59466	4.33e-06	0.000801121	0.595818
ENSMUSG00000045502	Hcar2	protein_coding	3.9923	6.85143	2.94529	21.3619	22.1667	44.8419	17.0266	0.111462	4.5799	4.65e-06	0.000848006	-0.498829
ENSMUSG00000025511	Tspan4	protein_coding	238.54	261.333	236.605	146.863	141.061	152.462	196.144	0.118943	-4.56792	4.93e-06	0.000885794	0.544197
ENSMUSG00000025314	Ptprj	protein_coding	296.428	334.741	224.823	487.763	426.205	491.019	376.83	0.117626	4.50921	6.51e-06	0.00113929	-0.530665
ENSMUSG00000046805	Mpeg1	protein_coding	105.796	144.859	102.103	210.059	207.561	212.999	163.896	0.125637	4.50979	6.49e-06	0.00113929	-0.567516
ENSMUSG00000022876	Samsn1	protein_coding	92.8209	137.029	94.2491	159.324	216.629	272.415	162.078	0.131905	4.50126	6.76e-06	0.00116742	-0.593639
ENSMUSG00000027995	Tlr2	protein_coding	275.469	427.725	323.981	458.39	766.765	619.939	478.712	0.126347	4.48344	7.34e-06	0.00125307	-0.566267
ENSMUSG00000033066	Gas7	protein_coding	140.728	177.158	99.1579	304.407	248.871	227.573	199.649	0.129281	4.46663	7.95e-06	0.00133847	-0.577879
ENSMUSG00000051351	Zfp46	protein_coding	797.461	1038.48	755.957	1124.17	1729	1395.7	1140.13	0.1183	4.4458	8.76e-06	0.00145656	-0.525858
ENSMUSG00000039960	Rhou	protein_coding	89.8267	81.2384	85.4133	151.313	199.5	135.647	123.823	0.130142	4.43023	9.41e-06	0.00153435	-0.577685
ENSMUSG00000052270	Fpr2	protein_coding	39.923	36.2147	20.617	64.9757	82.6212	95.289	56.6068	0.134091	4.42928	9.45e-06	0.00153435	-0.593824
ENSMUSG00000024803	Ankrd1	protein_coding	27478	21722	19513.5	14615.1	13666.8	17221.5	19036.1	0.107779	-4.41058	1.03e-05	0.00165286	0.475316
ENSMUSG00000073421	H2-Ab1	protein_coding	175.661	179.116	192.425	322.208	318.394	252.236	240.007	0.118609	4.38983	1.13e-05	0.0017971	-0.521295
ENSMUSG00000024610	Cd74	protein_coding	613.816	594.117	563.531	885.628	895.735	767.918	720.124	0.100504	4.35586	1.33e-05	0.00205399	-0.437906
ENSMUSG00000028211	Trp53inp1	protein_coding	527.981	524.624	552.732	388.074	364.742	329.588	447.957	0.105409	-4.35553	1.33e-05	0.00205399	0.459396
ENSMUSG00000064246	Chil1	protein_coding	16.9673	6.85143	7.85409	24.0321	50.3788	52.6892	26.4622	0.120761	4.35195	1.35e-05	0.00206381	-0.51577
ENSMUSG00000075270	Pde11a	protein_coding	16.9673	16.6392	20.617	61.4154	32.2424	73.9891	36.9784	0.12893	4.33837	1.44e-05	0.00217056	-0.556061
ENSMUSG00000055320	Tead1	protein_coding	3060.1	2838.45	2614.43	3898.54	3855.99	3796.99	3344.08	0.0892055	4.31669	1.58e-05	0.00236813	-0.385084
ENSMUSG00000040596	Pogk	protein_coding	317.388	307.336	299.437	429.018	462.477	486.535	383.698	0.10703	4.31218	1.62e-05	0.00239009	-0.461761
ENSMUSG00000060600	Eno3	protein_coding	9167.31	9897.38	9863.76	6532.29	6945.22	7772.22	8363.03	0.0902484	-4.29633	1.74e-05	0.00253923	0.387736
ENSMUSG00000041577	Prelp	protein_coding	209.596	262.312	189.48	352.471	408.068	319.499	290.238	0.119884	4.28785	1.8e-05	0.00260378	-0.514419
ENSMUSG00000110496	Gm45909	TEC	16.9673	14.6816	19.6352	0	1.00758	0	8.71528	0.09392	-4.28593	1.82e-05	0.00260378	0.427604
ENSMUSG00000056529	Ptafr	protein_coding	83.8382	106.687	52.0334	157.544	169.273	153.584	120.493	0.13282	4.28228	1.85e-05	0.00261873	-0.569246
ENSMUSG00000037940	Inpp4b	protein_coding	782.49	622.501	597.893	979.976	1021.68	936.075	823.436	0.105403	4.25273	2.11e-05	0.00295609	-0.44833
ENSMUSG00000048416	Mlf1	protein_coding	1419.26	1289.05	1476.57	969.295	915.886	1086.3	1192.73	0.0980278	-4.25054	2.13e-05	0.00295609	0.416713
ENSMUSG00000021998	Lcp1	protein_coding	340.343	486.451	329.872	599.913	629.735	589.671	495.998	0.116154	4.2291	2.35e-05	0.0032187	-0.491371
ENSMUSG00000015053	Gata2	protein_coding	63.8768	91.0261	80.5045	42.7238	27.2045	30.2683	55.934	0.134373	-4.22549	2.38e-05	0.0032374	0.569393
ENSMUSG00000000204	Slfn4	protein_coding	148.713	150.731	129.593	247.442	474.568	628.908	296.659	0.125761	4.21804	2.46e-05	0.0033125	-0.51378
ENSMUSG00000089774	Slc5a3	protein_coding	409.21	280.909	281.766	198.487	128.97	212.999	252.057	0.129038	-4.20346	2.63e-05	0.00349795	0.542412
ENSMUSG00000029650	Slc46a3	protein_coding	161.688	171.286	188.498	97.0186	99.75	107.621	137.644	0.125727	-4.18347	2.87e-05	0.00372932	0.526959
ENSMUSG00000041220	Elovl6	protein_coding	35.9307	59.7053	42.2158	92.5682	104.788	93.0469	71.3758	0.13434	4.18223	2.89e-05	0.00372932	-0.563129
ENSMUSG00000056708	Ier5	protein_coding	910.244	949.412	923.838	662.218	499.758	707.381	775.475	0.108952	-4.18428	2.86e-05	0.00372932	0.455963
ENSMUSG00000021270	Hsp90aa1	protein_coding	7314.89	5231.56	5635.31	3617.28	2987.46	4801.45	4931.32	0.118568	-4.17942	2.92e-05	0.00373947	0.495395
ENSMUSG00000039084	Chad	protein_coding	2.99422	0.978776	4.90881	24.0321	34.2576	10.0894	12.8768	0.10107	4.17535	2.98e-05	0.00377059	-0.405771
ENSMUSG00000037095	Lrg1	protein_coding	514.008	507.006	516.407	723.634	661.977	876.659	633.282	0.107023	4.171	3.03e-05	0.00380705	-0.446475
ENSMUSG00000031849	Comp	protein_coding	15.9692	20.5543	19.6352	34.7131	65.4924	60.5366	36.1501	0.129895	4.15458	3.26e-05	0.0040529	-0.53778
ENSMUSG00000035678	Tnfsf9	protein_coding	11.9769	27.4057	16.6899	29.3726	80.6061	70.626	39.4462	0.125604	4.15117	3.31e-05	0.00407562	-0.513284
ENSMUSG00000021614	Vcan	protein_coding	497.041	566.711	513.461	798.4	865.508	656.934	649.676	0.107871	4.13236	3.59e-05	0.00435104	-0.445893
ENSMUSG00000028826	Tmem57	protein_coding	462.108	468.834	497.753	329.329	309.326	343.041	401.732	0.10593	-4.13197	3.6e-05	0.00435104	0.437921
ENSMUSG00000025044	Msr1	protein_coding	165.68	191.84	127.629	282.155	285.144	239.904	215.392	0.123791	4.12889	3.65e-05	0.00437	-0.511624
ENSMUSG00000020901	Pik3r5	protein_coding	158.694	132.135	75.5957	211.839	221.667	246.63	174.427	0.131588	4.08311	4.44e-05	0.00527965	-0.537247
ENSMUSG00000078234	Klhdc7a	protein_coding	45.9114	30.342	19.6352	72.0964	104.788	60.5366	55.5516	0.132793	4.06222	4.86e-05	0.00572425	-0.537781
ENSMUSG00000026077	Npas2	protein_coding	33.9345	46.0025	56.9422	83.6674	120.909	86.3207	71.296	0.13456	4.0476	5.17e-05	0.00604012	-0.545223
ENSMUSG00000031825	Crispld2	protein_coding	425.18	556.923	550.768	785.049	817.144	669.265	634.055	0.110615	4.02763	5.63e-05	0.00651952	-0.445636
ENSMUSG00000019944	Rhobtb1	protein_coding	2194.77	1977.13	1943.89	1478.42	1609.1	1440.55	1773.97	0.0928884	-4.02141	5.79e-05	0.0066363	0.373571
ENSMUSG00000030862	Cpxm2	protein_coding	503.029	440.449	314.164	698.712	605.553	654.692	536.1	0.118031	4.00999	6.07e-05	0.00688022	-0.473383
ENSMUSG00000045551	Fpr1	protein_coding	25.9499	19.5755	10.7994	34.7131	65.4924	62.7787	36.5515	0.128076	4.00887	6.1e-05	0.00688022	-0.509384
ENSMUSG00000030126	Tmcc1	protein_coding	559.92	574.541	537.024	381.844	327.462	432.724	468.919	0.109052	-4.00275	6.26e-05	0.00700141	0.436644
ENSMUSG00000031431	Tsc22d3	protein_coding	521.993	558.881	533.097	425.457	347.614	288.109	445.858	0.114572	-3.9977	6.4e-05	0.00709262	0.458308
ENSMUSG00000027314	Dll4	protein_coding	146.717	131.156	159.045	98.7987	72.5455	70.626	113.148	0.130667	-3.98701	6.69e-05	0.00735859	0.522235
ENSMUSG00000026821	Ralgds	protein_coding	291.438	441.428	427.066	529.597	616.636	674.871	496.839	0.119226	3.9829	6.81e-05	0.00736545	-0.474907
ENSMUSG00000091562	Crybg3	processed_transcript	250.517	235.885	222.86	341.79	349.629	359.856	293.423	0.111172	3.98469	6.76e-05	0.00736545	-0.443269
ENSMUSG00000038143	Stox2	protein_coding	208.598	217.288	214.024	300.847	357.689	309.409	267.976	0.114359	3.97844	6.94e-05	0.00744426	-0.455305
ENSMUSG00000038301	Snx10	protein_coding	514.008	509.942	540.951	601.693	874.576	904.685	657.643	0.115365	3.96244	7.42e-05	0.00789781	-0.457126
ENSMUSG00000003283	Hck	protein_coding	70.8633	76.3445	35.3434	115.71	121.917	130.042	91.7033	0.134314	3.95847	7.54e-05	0.00796633	-0.531767
ENSMUSG00000039910	Cited2	protein_coding	700.648	839.789	746.139	487.763	458.447	613.213	641	0.110221	-3.95303	7.72e-05	0.00808556	0.435761
ENSMUSG00000021143	Pacs2	protein_coding	389.249	393.468	359.325	572.32	512.856	534.74	460.326	0.10439	3.9428	8.05e-05	0.00830762	-0.411753
ENSMUSG00000087006	Gm13889	protein_coding	168.675	222.182	189.48	298.176	262.977	378.914	253.401	0.123152	3.94405	8.01e-05	0.00830762	-0.485924
ENSMUSG00000031016	Wee1	protein_coding	275.469	272.1	288.638	172.675	121.917	210.757	223.592	0.125611	-3.93592	8.29e-05	0.00841881	0.49461
ENSMUSG00000037692	Ahdc1	protein_coding	344.336	322.996	237.586	461.951	423.182	507.835	382.981	0.117437	3.93661	8.26e-05	0.00841881	-0.462443
ENSMUSG00000026202	Tuba4a	protein_coding	4167.96	5033.84	3505.87	2757.46	2681.16	3310.45	3576.12	0.108999	-3.92057	8.83e-05	0.00890574	0.42731
ENSMUSG00000034647	Ankrd12	protein_coding	332.359	311.251	345.58	204.718	243.833	210.757	274.75	0.114236	-3.91359	9.09e-05	0.00909834	0.447403
ENSMUSG00000102376	Gm37975	TEC	5.98845	4.89388	3.92705	10.6809	37.2803	29.1472	15.3196	0.106504	3.90773	9.32e-05	0.0092522	-0.402378
ENSMUSG00000063410	Stk24	protein_coding	485.064	413.043	456.519	639.076	601.523	665.902	543.521	0.103514	3.90005	9.62e-05	0.00941023	-0.403813
ENSMUSG00000073643	Wdfy1	protein_coding	79.846	101.793	83.4497	222.52	190.432	103.136	130.196	0.13405	3.90164	9.55e-05	0.00941023	-0.523033
ENSMUSG00000109904	Gm45819	TEC	118.771	120.389	124.684	61.4154	57.4318	81.8365	94.0879	0.131946	-3.89407	9.86e-05	0.00957487	0.51465
ENSMUSG00000023078	Cxcl13	protein_coding	1.99615	5.87265	3.92705	18.6916	29.2197	16.8157	12.7538	0.10566	3.88963	0.000100399	0.0096812	-0.402769
ENSMUSG00000031488	Rab11fip1	protein_coding	18.9634	16.6392	12.7629	34.7131	47.3561	51.5682	30.3338	0.128737	3.88408	0.000102718	0.00983257	-0.499039
ENSMUSG00000057596	Trim30d	protein_coding	71.8614	128.22	106.03	131.732	233.758	221.967	148.928	0.133707	3.88236	0.000103446	0.00983257	-0.518558
ENSMUSG00000028042	Zbtb7b	protein_coding	119.769	95.92	94.2491	175.345	173.303	165.915	137.417	0.126387	3.87956	0.000104646	0.00987605	-0.491096
ENSMUSG00000044017	Adgrd1	protein_coding	88.8286	87.111	100.14	153.093	143.076	170.399	123.775	0.127683	3.87628	0.000106068	0.00993974	-0.49574
ENSMUSG00000020227	Irak3	protein_coding	276.467	251.545	222.86	329.329	381.871	430.482	315.426	0.116556	3.87148	0.000108177	0.00998319	-0.4514
ENSMUSG00000026321	Tnfrsf11a	protein_coding	44.9133	44.0449	57.9239	91.6781	99.75	91.9259	71.706	0.133852	3.86863	0.00010945	0.00998319	-0.519133
ENSMUSG00000031490	Eif4ebp1	protein_coding	601.839	542.242	547.823	422.787	362.727	408.061	480.913	0.105359	-3.86844	0.000109532	0.00998319	0.407734
ENSMUSG00000069662	Marcks	protein_coding	553.931	786.936	702.941	966.625	927.977	1081.81	836.704	0.110131	3.87129	0.00010826	0.00998319	-0.42639
ENSMUSG00000097815	Gm26809	lincRNA	175.661	220.225	214.024	265.243	315.371	395.73	264.376	0.123039	3.85003	0.000118106	0.0106914	-0.473822
ENSMUSG00000060586	H2-Eb1	protein_coding	234.547	218.267	223.842	383.624	355.674	285.867	283.637	0.116889	3.84747	0.000119343	0.0107304	-0.450083
ENSMUSG00000038776	Ephx1	protein_coding	261.495	287.76	226.787	175.345	176.326	139.01	211.121	0.121853	-3.83817	0.000123953	0.0110701	0.468242
ENSMUSG00000039232	Stx11	protein_coding	178.655	310.272	245.44	295.506	488.674	499.987	336.423	0.130451	3.83247	0.000126866	0.0112547	-0.499571
ENSMUSG00000036661	Dennd3	protein_coding	192.628	187.925	239.55	312.418	314.364	309.409	259.382	0.116396	3.82902	0.000128655	0.0113378	-0.446002
ENSMUSG00000040249	Lrp1	protein_coding	1162.76	1337.01	1251.75	2069.43	2019.18	1401.31	1540.24	0.111818	3.82726	0.000129577	0.011344	-0.427976
ENSMUSG00000063576	Klhdc3	protein_coding	464.105	435.555	452.592	316.868	336.53	299.32	384.162	0.106643	-3.80512	0.000141734	0.0123272	0.405999
ENSMUSG00000000957	Mmp14	protein_coding	167.676	259.376	266.057	384.514	388.924	328.467	299.169	0.123284	3.79871	0.000145449	0.0124871	-0.468543
ENSMUSG00000015932	Dstn	protein_coding	1424.25	1475.99	1565.91	1027.15	1042.84	1228.67	1294.14	0.0974058	-3.80011	0.000144629	0.0124871	0.370172
ENSMUSG00000024011	Pi16	protein_coding	232.551	254.482	237.586	421.897	404.038	288.109	306.444	0.119826	3.77996	0.000156853	0.0133798	-0.453244
ENSMUSG00000003617	Cp	protein_coding	2624.94	1980.06	1915.42	2759.24	3343.14	3162.48	2630.88	0.107547	3.77131	0.000162393	0.0137641	-0.405577
ENSMUSG00000017009	Sdc4	protein_coding	1145.79	1330.16	911.075	1590.57	1545.62	1687.18	1368.4	0.108075	3.7637	0.000167418	0.0140115	-0.406771
ENSMUSG00000032010	Usp2	protein_coding	851.357	699.825	640.109	534.937	502.78	501.108	621.686	0.107968	-3.76456	0.000166846	0.0140115	0.406556
ENSMUSG00000040170	Fmo2	protein_coding	773.508	846.641	793.263	641.747	583.386	467.477	684.337	0.108138	-3.75743	0.000171668	0.0142775	0.406458
ENSMUSG00000031722	Hp	protein_coding	59.8845	50.8963	36.3252	80.1071	110.833	98.6522	72.7831	0.134439	3.75369	0.00017425	0.0144022	-0.5051
ENSMUSG00000001248	Gramd1a	protein_coding	604.833	644.034	621.455	766.358	871.553	930.469	739.784	0.101094	3.74568	0.000179904	0.014687	-0.37871
ENSMUSG00000078763	Slfn1	protein_coding	25.9499	31.3208	17.6717	46.2841	59.447	71.747	42.0701	0.132315	3.74636	0.000179421	0.014687	-0.49509
ENSMUSG00000017765	Slc12a4	protein_coding	538.96	518.751	484.009	372.053	370.788	365.461	441.67	0.104037	-3.73573	0.000187172	0.0149639	0.388807
ENSMUSG00000026313	Hdac4	protein_coding	468.097	514.836	446.702	387.184	269.023	299.32	397.527	0.116312	-3.7349	0.000187793	0.0149639	0.434657
ENSMUSG00000032661	Oas3	protein_coding	17.9653	26.4269	14.7264	37.3833	44.3333	76.2312	36.1778	0.128322	3.73534	0.000187464	0.0149639	-0.476059
ENSMUSG00000044938	Klhl31	protein_coding	889.284	1012.05	1083.86	736.095	748.629	705.139	862.511	0.099831	-3.7372	0.000186081	0.0149639	0.373155
ENSMUSG00000017830	Dhx58	protein_coding	36.9288	63.6204	68.7233	72.9864	142.068	141.252	87.5965	0.134372	3.7264	0.000194235	0.015204	-0.499347
ENSMUSG00000026082	Rev1	protein_coding	171.669	188.904	163.954	100.579	113.856	112.105	141.844	0.125227	-3.72913	0.000192145	0.015204	0.467631
ENSMUSG00000042254	Cilp	protein_coding	54.8941	63.6204	54.9787	124.611	160.205	68.3839	87.7821	0.134551	3.72687	0.000193873	0.015204	-0.501164
ENSMUSG00000027365	Trpm7	protein_coding	1232.62	1051.2	1130.01	874.057	784.902	868.812	990.267	0.0980784	-3.72153	0.000198016	0.0153236	0.36505
ENSMUSG00000037921	Ddx60	protein_coding	38.9249	50.8963	58.9057	57.8551	155.167	117.71	79.9098	0.133496	3.72147	0.000198065	0.0153236	-0.494481
ENSMUSG00000044103	Il1f9	protein_coding	26.948	7.8302	13.7447	36.4932	37.2803	72.8681	32.5274	0.122859	3.71289	0.000204909	0.0157614	-0.448882
ENSMUSG00000005087	Cd44	protein_coding	409.21	386.616	376.996	556.299	483.636	632.271	474.172	0.109307	3.69784	0.000217439	0.0164525	-0.404293
ENSMUSG00000026712	Mrc1	protein_coding	630.783	676.334	612.619	1024.48	958.205	742.133	774.092	0.108787	3.69826	0.000217085	0.0164525	-0.402411
ENSMUSG00000070031	Sp140	protein_coding	41.9191	58.7265	47.1246	58.7452	127.962	128.92	77.233	0.134144	3.69765	0.000217603	0.0164525	-0.494525
ENSMUSG00000030921	Trim30a	protein_coding	448.135	712.549	677.416	704.052	1110.35	1164.77	802.878	0.126454	3.68916	0.000224999	0.0169156	-0.46627
ENSMUSG00000057606	Colq	protein_coding	35.9307	43.0661	31.4164	68.536	73.553	80.7154	55.5363	0.134571	3.68104	0.000232288	0.0173655	-0.496353
ENSMUSG00000073418	C4b	protein_coding	83.8382	128.22	79.5227	180.686	189.424	139.01	133.45	0.131686	3.67717	0.000235836	0.0175322	-0.48469
ENSMUSG00000020893	Per1	protein_coding	652.741	483.515	560.586	439.699	367.765	350.888	475.866	0.114173	-3.67189	0.000240759	0.0177988	0.419402
ENSMUSG00000026656	Fcgr2b	protein_coding	316.39	320.06	258.203	444.149	464.492	387.882	365.196	0.112915	3.66481	0.000247521	0.0181976	-0.414005
ENSMUSG00000031596	Slc7a2	protein_coding	211.592	201.628	108.976	238.541	310.333	363.219	239.048	0.131733	3.66138	0.000250862	0.0183419	-0.48195
ENSMUSG00000055632	Hmcn2	protein_coding	243.53	269.163	227.769	480.642	364.742	301.562	314.568	0.122715	3.64212	0.000270406	0.0194503	-0.447203
ENSMUSG00000079105	C7	protein_coding	133.742	180.095	203.225	270.584	311.341	237.662	222.775	0.124956	3.6433	0.000269168	0.0194503	-0.455558
ENSMUSG00000091898	Tnnc1	protein_coding	18773.8	18408.8	18910.7	13296.9	14221.9	15915.5	16587.9	0.0887073	-3.64473	0.000267668	0.0194503	0.323312
ENSMUSG00000015305	Sash1	protein_coding	528.979	773.233	847.26	1044.95	1129.49	995.49	886.568	0.116187	3.62755	0.000286127	0.0203609	-0.421491
ENSMUSG00000022148	Fyb	protein_coding	80.844	72.4294	39.2705	109.48	143.076	113.226	93.0542	0.134336	3.62782	0.000285821	0.0203609	-0.487352
ENSMUSG00000027035	Cers6	protein_coding	98.8094	93.9625	65.778	162.884	165.242	119.952	117.771	0.131748	3.62493	0.000289037	0.0204586	-0.478185
ENSMUSG00000026581	Sell	protein_coding	33.9345	45.0237	38.2887	78.3269	67.5076	85.1996	58.0468	0.134569	3.61771	0.000297217	0.0209263	-0.487818
ENSMUSG00000033581	Igf2bp2	protein_coding	204.605	163.456	152.173	272.364	229.727	306.046	221.395	0.123119	3.61194	0.000303917	0.0212854	-0.444927
ENSMUSG00000027368	Dusp2	protein_coding	25.9499	30.342	30.4346	49.8444	58.4394	80.7154	45.9543	0.133499	3.59486	0.000324566	0.0226125	-0.479831
ENSMUSG00000058881	Zfp516	protein_coding	191.63	247.63	236.605	273.254	375.826	390.125	285.845	0.122194	3.58258	0.000340222	0.0235799	-0.43785
ENSMUSG00000027360	Hdc	protein_coding	89.8267	92.0049	165.918	161.994	215.621	244.388	161.626	0.133191	3.57467	0.000350666	0.0241778	-0.475758
ENSMUSG00000032177	Pde4a	protein_coding	352.32	339.635	293.547	421.007	480.614	492.14	396.544	0.110101	3.56558	0.000363059	0.0249032	-0.392674
ENSMUSG00000054641	Mmrn1	protein_coding	56.8902	75.3657	92.2856	129.951	122.924	135.647	102.177	0.131976	3.55969	0.000371288	0.0252078	-0.470428
ENSMUSG00000060477	Irak2	protein_coding	236.544	250.567	221.878	318.648	380.864	325.104	288.934	0.114044	3.56038	0.000370317	0.0252078	-0.40625
ENSMUSG00000037885	Stk35	protein_coding	334.355	316.145	290.601	207.388	192.447	243.267	264.034	0.116405	-3.55336	0.00038034	0.0256913	0.413831
ENSMUSG00000028982	Slc25a33	protein_coding	286.447	354.317	304.346	226.08	141.061	230.936	257.198	0.125803	-3.55124	0.000383414	0.0257053	0.446919
ENSMUSG00000040675	Mthfd1l	protein_coding	26.948	54.8114	53.9969	13.3512	16.1212	22.421	31.2749	0.126593	-3.55056	0.00038441	0.0257053	0.446199
ENSMUSG00000024066	Xdh	protein_coding	1595.92	1774.52	1456.93	2176.24	2491.73	1911.39	1901.12	0.103347	3.5471	0.000389495	0.0259151	-0.366597
ENSMUSG00000071713	Csf2rb	protein_coding	68.8671	86.1323	84.4315	157.544	143.076	107.621	107.945	0.131638	3.53471	0.00040822	0.0270258	-0.466102
ENSMUSG00000027230	Creb3l1	protein_coding	44.9133	56.769	56.9422	100.579	102.773	82.9575	74.1556	0.133757	3.51767	0.000435351	0.0286793	-0.471562
ENSMUSG00000036863	Syde2	protein_coding	178.655	187.925	267.039	119.271	152.144	117.71	170.457	0.128766	-3.51635	0.000437529	0.0286808	0.453094
ENSMUSG00000040740	Slc25a34	protein_coding	1411.28	1163.76	998.452	1794.4	1566.78	1589.65	1420.72	0.10739	3.51221	0.000444397	0.0289882	-0.377194
ENSMUSG00000060798	Intu	protein_coding	518.999	488.409	508.553	323.098	349.629	414.788	433.913	0.10912	-3.49832	0.000468195	0.030244	0.381804
ENSMUSG00000102037	Bcl2a1a	protein_coding	3.9923	4.89388	3.92705	17.8016	19.1439	20.1789	11.6563	0.10573	3.49953	0.000466076	0.030244	-0.364955
ENSMUSG00000028057	Rit1	protein_coding	362.301	464.918	513.461	323.989	310.333	288.109	377.185	0.115991	-3.49533	0.000473475	0.0304374	0.405612
ENSMUSG00000028599	Tnfrsf1b	protein_coding	144.721	204.564	166.899	259.903	240.811	282.504	216.567	0.122018	3.49175	0.00047986	0.0306995	-0.426321
ENSMUSG00000068745	Mybphl	protein_coding	0.998074	0	3.92705	4.45039	24.1818	17.9368	8.58235	0.0850737	3.48322	0.000495423	0.0315435	-0.276592
ENSMUSG00000033538	Casp4	protein_coding	559.92	573.562	597.893	650.647	935.03	856.48	695.589	0.111299	3.47259	0.000515471	0.0326006	-0.386511
ENSMUSG00000042349	Ikbke	protein_coding	26.948	24.4694	10.7994	57.8551	51.3864	40.3577	35.3027	0.129269	3.47183	0.000516926	0.0326006	-0.44765
ENSMUSG00000004667	Polr2e	protein_coding	467.099	437.513	425.103	302.627	348.621	309.409	381.729	0.10806	-3.46312	0.000533954	0.0332363	0.374367
ENSMUSG00000041653	Pnpla3	protein_coding	10.9788	5.87265	7.85409	17.8016	46.3485	22.421	18.5461	0.113044	3.46284	0.000534498	0.0332363	-0.383838
ENSMUSG00000047604	Frat2	protein_coding	126.755	104.729	91.3038	60.5253	37.2803	75.1102	82.6173	0.134479	-3.46369	0.000532817	0.0332363	0.465723
ENSMUSG00000046480	Scn4b	protein_coding	558.922	533.433	349.507	888.298	638.803	667.023	605.998	0.123107	3.45867	0.000542848	0.0335985	-0.425792
ENSMUSG00000040711	Sh3pxd2b	protein_coding	253.511	415.001	366.197	592.792	477.591	486.535	431.938	0.121892	3.44466	0.000571772	0.0352249	-0.419973
ENSMUSG00000107997	Gm44243	TEC	36.9288	30.342	48.1063	20.4718	12.0909	10.0894	26.3382	0.124858	-3.43847	0.000585004	0.035874	0.428224
ENSMUSG00000033880	Lgals3bp	protein_coding	247.522	420.874	382.887	405.876	657.947	622.181	456.215	0.128455	3.4322	0.000598695	0.0365451	-0.440676
ENSMUSG00000030790	Adm	protein_coding	138.732	165.413	107.012	155.764	273.053	271.293	185.211	0.132154	3.42988	0.000603858	0.036692	-0.452986
ENSMUSG00000096929	A330023F24Rik	processed_transcript	192.628	103.75	105.049	73.8765	84.6364	56.0524	102.665	0.134513	-3.42497	0.000614858	0.0371905	0.460552
ENSMUSG00000022462	Slc38a2	protein_coding	5024.31	4532.71	5525.35	3651.99	3097.29	4318.28	4358.32	0.105694	-3.42135	0.000623121	0.0373508	0.361604
ENSMUSG00000028480	Glipr2	protein_coding	31.9384	42.0874	43.1975	73.8765	69.5227	79.5944	56.7028	0.134572	3.42217	0.00062124	0.0373508	-0.461397
ENSMUSG00000046470	Sox18	protein_coding	74.8556	61.6629	97.1944	48.9543	41.3106	17.9368	56.9858	0.132823	-3.41807	0.000630676	0.0376341	0.453793
ENSMUSG00000070034	Sp110	protein_coding	69.8652	124.305	91.3038	119.271	204.538	182.731	132.002	0.13371	3.41548	0.000636688	0.0378232	-0.456397
ENSMUSG00000040747	Cd53	protein_coding	192.628	229.033	172.79	320.428	246.856	321.741	247.246	0.121591	3.40627	0.000658569	0.0389492	-0.414381
ENSMUSG00000063011	Msln	protein_coding	4.99037	1.95755	0.981762	9.79086	14.1061	24.663	9.41494	0.0937466	3.40361	0.000665006	0.0391559	-0.306834
ENSMUSG00000057666	Gapdh	protein_coding	17486.3	18755.3	18303	13751.7	13996.2	15581.4	16312.3	0.0863299	-3.39955	0.000674981	0.0395681	0.293481
ENSMUSG00000044086	Lmod3	protein_coding	965.138	919.07	866.896	593.682	688.174	762.312	799.212	0.103683	-3.39609	0.000683552	0.0398949	0.352131
ENSMUSG00000021025	Nfkbia	protein_coding	1501.1	1791.16	1674.89	1773.04	2606.6	2623.25	1995.01	0.112736	3.39339	0.000690324	0.0401142	-0.382526
ENSMUSG00000032369	Plscr1	protein_coding	535.966	559.86	589.057	620.385	846.364	923.743	679.229	0.113751	3.39065	0.000697281	0.0403423	-0.385679
ENSMUSG00000045827	Serpinb9	protein_coding	205.603	227.076	251.331	339.12	309.326	322.862	275.886	0.114184	3.38709	0.000706387	0.0405168	-0.386969
ENSMUSG00000047867	Gimap6	protein_coding	443.145	427.725	424.121	557.189	660.97	542.587	509.289	0.105836	3.38764	0.00070497	0.0405168	-0.358617
ENSMUSG00000034858	Fam214a	protein_coding	831.396	851.535	1114.3	789.5	599.508	531.377	786.269	0.118117	-3.38482	0.000712251	0.0406778	0.399876
ENSMUSG00000038894	Irs2	protein_coding	867.327	795.745	770.683	580.331	447.364	689.444	691.816	0.114256	-3.37115	0.00074856	0.0423876	0.385184
ENSMUSG00000073902	Gm1966	unprocessed_pseudogene	26.948	23.4906	20.617	41.8337	53.4015	59.4155	37.6177	0.132199	3.37216	0.000745804	0.0423876	-0.445736
ENSMUSG00000033450	Tagap	protein_coding	2.99422	3.9151	5.89057	15.1313	19.1439	21.2999	11.3958	0.104122	3.36971	0.000752485	0.0424293	-0.344844
ENSMUSG00000048490	Nrip1	protein_coding	1059.95	1016.95	912.057	705.832	581.371	855.359	855.254	0.111489	-3.36669	0.000760757	0.0427148	0.375354
ENSMUSG00000054203	Ifi205	protein_coding	967.134	1071.76	844.315	1184.69	1266.52	1418.13	1125.43	0.103324	3.36362	0.000769283	0.043012	-0.347553
ENSMUSG00000039633	Lonrf1	protein_coding	173.665	182.052	143.337	89.8979	68.5152	135.647	132.186	0.132746	-3.3623	0.000772953	0.0430364	0.446144
ENSMUSG00000101389	Ms4a4a	protein_coding	49.9037	47.96	41.234	94.3483	91.6894	67.2629	65.3997	0.134442	3.34958	0.000809349	0.044875	-0.451241
ENSMUSG00000040322	Slc25a24	protein_coding	63.8768	88.0898	104.067	53.4047	46.3485	34.7525	65.0898	0.134556	-3.33619	0.000849345	0.0468972	0.449635
ENSMUSG00000019997	Ctgf	protein_coding	2245.67	2179.73	2369.97	1516.69	1015.64	2006.68	1889.06	0.122948	-3.33269	0.000860107	0.0471794	0.409618
ENSMUSG00000033083	Tbc1d4	protein_coding	1077.92	911.24	931.692	1347.58	1201.03	1272.39	1123.64	0.0980609	3.33222	0.000861547	0.0471794	-0.326789
ENSMUSG00000029246	Ppat	protein_coding	287.445	248.609	260.167	193.147	183.379	178.247	225.166	0.11677	-3.3277	0.000875651	0.0477553	0.388882
ENSMUSG00000021091	Serpina3n	protein_coding	873.315	960.179	887.513	1211.4	1436.8	1038.09	1067.88	0.106368	3.32334	0.000889467	0.0482641	-0.35353
ENSMUSG00000049313	Sorl1	protein_coding	141.727	148.774	135.483	188.697	221.667	221.967	176.386	0.121697	3.32247	0.000892235	0.0482641	-0.40462
ENSMUSG00000029683	Lmod2	protein_coding	8847.93	9232.79	9802.89	7971.54	7119.53	7023.36	8333.01	0.0884919	-3.3119	0.000926643	0.0495439	0.293079
ENSMUSG00000039286	Fndc3b	protein_coding	752.548	873.068	807.008	1079.67	1055.94	1020.15	931.397	0.0963218	3.31177	0.000927064	0.0495439	-0.319033
ENSMUSG00000074151	Nlrc5	protein_coding	169.673	230.012	181.626	190.477	412.099	381.156	260.84	0.132729	3.31296	0.000923135	0.0495439	-0.439225
ENSMUSG00000071540	3425401B19Rik	protein_coding	1353.39	1357.56	1289.05	981.757	1118.41	1013.43	1185.6	0.0937996	-3.30937	0.000935078	0.0497724	0.31044
ENSMUSG00000071714	Csf2rb2	protein_coding	104.798	144.859	174.754	202.938	268.015	202.91	183.045	0.129102	3.30314	0.000956085	0.0506877	-0.426614
ENSMUSG00000044951	Mylk4	protein_coding	3547.16	2813	2169.69	1928.8	1958.73	2169.23	2431.1	0.114372	-3.29824	0.000972942	0.0513767	0.377194
ENSMUSG00000001751	Naglu	protein_coding	61.8806	60.6841	58.9057	40.9436	26.197	20.1789	44.7983	0.133141	-3.2851	0.00101946	0.0536203	0.438306
ENSMUSG00000024899	Papss2	protein_coding	234.547	271.121	257.222	317.758	365.75	386.761	305.527	0.113641	3.283	0.00102708	0.0538086	-0.373195
ENSMUSG00000015647	Lama5	protein_coding	1143.79	1158.87	1115.28	1915.45	1371.31	1374.4	1346.52	0.108924	3.26732	0.0010857	0.0564352	-0.355919
ENSMUSG00000104713	Gbp6	protein_coding	284.451	431.64	404.486	395.195	768.78	616.576	483.521	0.129544	3.26786	0.00108364	0.0564352	-0.423083
ENSMUSG00000022126	Acod1	protein_coding	59.8845	101.793	76.5774	111.26	402.023	387.882	189.903	0.102105	3.2598	0.00111492	0.0577284	-0.308153
ENSMUSG00000042364	Snx18	protein_coding	310.401	387.595	411.358	527.817	485.652	512.319	439.19	0.110698	3.25655	0.00112774	0.0580429	-0.360593
ENSMUSG00000054499	Dedd2	protein_coding	134.74	130.177	121.738	88.1178	77.5833	77.3523	104.952	0.129564	-3.25606	0.00112972	0.0580429	0.422619
ENSMUSG00000043154	Ppp2r3a	protein_coding	5649.1	5565.32	6489.44	4306.2	4592.53	4977.45	5263.34	0.0930478	-3.25482	0.00113463	0.0580712	0.302853
ENSMUSG00000023991	Foxp4	protein_coding	167.676	163.456	157.082	202.938	251.894	258.962	200.335	0.120905	3.24018	0.00119452	0.0609024	-0.391933
ENSMUSG00000025340	Rabgef1	protein_coding	294.432	307.336	317.109	418.337	382.879	449.54	361.605	0.108841	3.23786	0.0012043	0.0611664	-0.352515
ENSMUSG00000007655	Cav1	protein_coding	1542.02	1890.99	1638.56	1437.48	1269.55	1013.43	1465.34	0.109267	-3.23095	0.00123381	0.062102	0.353072
ENSMUSG00000022150	Dab2	protein_coding	678.691	794.766	792.282	1152.65	941.076	930.469	881.656	0.10506	3.2281	0.00124614	0.062102	-0.339196
ENSMUSG00000030470	Csrp3	protein_coding	8575.46	7506.23	7963.07	6272.38	6322.54	6684.81	7220.75	0.0869814	-3.22989	0.00123839	0.062102	0.280944
ENSMUSG00000034206	Polq	protein_coding	110.786	111.58	109.957	152.203	188.417	163.673	139.436	0.125782	3.22875	0.00124333	0.062102	-0.406506
ENSMUSG00000046688	Tifa	protein_coding	152.705	276.993	243.477	251.892	444.341	404.698	295.685	0.131763	3.22622	0.00125435	0.062102	-0.42477
ENSMUSG00000047139	Cd24a	protein_coding	53.896	45.0237	45.161	86.3376	66.5	107.621	67.4232	0.134524	3.22626	0.00125421	0.062102	-0.434256
ENSMUSG00000066842	Hmcn1	protein_coding	405.218	404.234	397.613	510.015	574.318	517.924	468.221	0.103646	3.22599	0.00125539	0.062102	-0.334437
ENSMUSG00000053475	Tnfaip6	protein_coding	125.757	163.456	207.152	180.686	299.25	339.677	219.33	0.132298	3.21315	0.00131289	0.0647061	-0.424741
ENSMUSG00000020737	Jpt1	protein_coding	447.137	379.765	423.139	289.275	297.235	330.709	361.21	0.110114	-3.20304	0.00135986	0.0667738	0.352792
ENSMUSG00000069516	Lyz2	protein_coding	861.338	1064.91	815.844	1356.48	1234.28	1095.26	1071.35	0.107152	3.20106	0.00136923	0.0669867	-0.343037
ENSMUSG00000055978	Fut2	protein_coding	58.8864	57.7478	47.1246	71.2063	100.758	118.831	75.7589	0.134391	3.19822	0.00138279	0.0672187	-0.429794
ENSMUSG00000060591	Ifitm2	protein_coding	201.611	235.885	217.951	299.956	309.326	301.562	261.049	0.113734	3.19795	0.00138408	0.0672187	-0.3639
ENSMUSG00000002100	Mybpc3	protein_coding	34660.1	38104.7	37681	26563.5	29998.6	31407.3	33069.2	0.0897436	-3.19217	0.00141207	0.0682146	0.286475
ENSMUSG00000032690	Oas2	protein_coding	190.632	296.569	301.401	324.879	443.333	414.788	328.6	0.125048	3.19161	0.00141484	0.0682146	-0.399103
ENSMUSG00000021701	Plk2	protein_coding	576.887	452.194	456.519	363.152	296.227	397.972	423.825	0.116038	-3.18702	0.00143748	0.0688248	0.369876
ENSMUSG00000062563	Cys1	protein_coding	27.9461	39.151	32.3981	16.0214	8.06061	14.5736	23.0251	0.123128	-3.18695	0.00143784	0.0688248	0.390898
ENSMUSG00000016664	Pacsin2	protein_coding	1368.36	1485.78	1467.73	1715.18	1844.87	1885.6	1627.92	0.0908335	3.18568	0.00144414	0.068879	-0.289375
ENSMUSG00000000489	Pdgfb	protein_coding	118.771	134.092	127.629	100.579	50.3788	71.747	100.533	0.133676	-3.18148	0.00146525	0.0696361	0.425831
ENSMUSG00000035621	Midn	protein_coding	1976.19	2079.9	1849.64	2669.35	2122.96	3270.1	2328.02	0.110752	3.17674	0.00148941	0.0705321	-0.351811
ENSMUSG00000040260	Daam2	protein_coding	44.9133	64.5992	73.6321	104.139	108.818	97.5311	82.2722	0.133606	3.17459	0.00150049	0.0708051	-0.424706
ENSMUSG00000026610	Esrrg	protein_coding	552.933	539.305	517.388	785.939	672.053	658.055	620.946	0.102924	3.16218	0.00156592	0.0726054	-0.325534
ENSMUSG00000028307	Aldob	protein_coding	55.8922	46.0025	64.7963	90.788	88.6667	104.257	75.0672	0.133731	3.16229	0.00156531	0.0726054	-0.423409
ENSMUSG00000034157	Cipc	protein_coding	719.612	571.605	597.893	462.841	445.349	499.987	549.548	0.107389	-3.16581	0.00154654	0.0726054	0.340024
ENSMUSG00000046916	Myct1	protein_coding	62.8787	75.3657	56.9422	48.9543	22.1667	22.421	48.1214	0.132153	-3.16341	0.00155934	0.0726054	0.418203
ENSMUSG00000095098	Ccdc85b	protein_coding	87.8305	107.665	81.4862	66.7559	45.3409	44.8419	72.3201	0.13437	-3.16218	0.00156592	0.0726054	0.425762
ENSMUSG00000036943	Rab8b	protein_coding	350.324	481.558	377.978	480.642	592.455	626.666	484.937	0.116243	3.16046	0.00157519	0.0727814	-0.3674
ENSMUSG00000063171	Rps4l	transcribed_processed_pseudogene	151.707	150.731	163.954	113.04	97.7349	96.4101	128.93	0.126638	-3.15786	0.00158932	0.0731803	0.400483
ENSMUSG00000030098	Grip2	protein_coding	101.804	96.8988	62.8327	120.161	143.076	164.794	114.928	0.132326	3.14926	0.00163684	0.0746535	-0.416808
ENSMUSG00000058624	Gda	protein_coding	529.977	629.353	654.835	863.376	801.023	737.649	702.702	0.104774	3.15072	0.00162867	0.0746535	-0.330174
ENSMUSG00000096054	Syne1	protein_coding	1596.92	1570.93	1524.68	1937.7	1920.44	1965.2	1752.64	0.0871308	3.14903	0.00163815	0.0746535	-0.274387
ENSMUSG00000018654	Ikzf1	protein_coding	33.9345	73.4082	33.3799	78.3269	85.6439	106.5	68.5322	0.133972	3.14764	0.00164593	0.0747521	-0.420938
ENSMUSG00000023019	Gpd1	protein_coding	420.189	354.317	293.547	582.111	410.083	542.587	433.806	0.12037	3.14645	0.00165265	0.0748023	-0.378791
ENSMUSG00000057367	Birc2	protein_coding	724.602	828.044	796.209	857.146	1231.26	1103.11	923.395	0.110331	3.14474	0.00166237	0.0749868	-0.34696
ENSMUSG00000011305	Plin5	protein_coding	1081.91	635.225	625.382	1198.94	1102.29	1118.81	960.425	0.122737	3.13734	0.00170491	0.076388	-0.385008
ENSMUSG00000015112	Slc25a13	protein_coding	1789.55	1795.07	1722.99	1300.4	1377.36	1523.5	1584.81	0.0928377	-3.13779	0.00170224	0.076388	0.291311
ENSMUSG00000033453	Adamts15	protein_coding	55.8922	27.4057	26.5076	66.7559	85.6439	63.8997	54.3508	0.133269	3.1347	0.00172027	0.0768176	-0.417161
ENSMUSG00000004891	Nes	protein_coding	269.48	299.505	281.766	210.059	192.447	210.757	244.002	0.114832	-3.12588	0.00177274	0.0783926	0.359162
ENSMUSG00000035783	Acta2	protein_coding	870.321	660.674	514.443	364.042	477.591	538.103	570.862	0.124933	-3.12626	0.00177047	0.0783926	0.39045
ENSMUSG00000040026	Saa3	protein_coding	132.744	88.0898	41.234	172.675	349.629	348.646	188.836	0.106017	3.12516	0.00177711	0.0783926	-0.312256
ENSMUSG00000069206	Zfp874a	protein_coding	69.8652	107.665	128.611	63.1956	54.4091	57.1734	80.1532	0.134426	-3.12483	0.00177911	0.0783926	0.420386
ENSMUSG00000015656	Hspa8	protein_coding	18667	16439.5	16578	12409.5	12120.1	15515.3	15288.2	0.0990616	-3.11635	0.00183104	0.0804147	0.308704
ENSMUSG00000026728	Vim	protein_coding	1220.64	1982.02	1931.13	1359.15	1183.9	1066.12	1457.16	0.119302	-3.11274	0.00185357	0.0808705	0.37134
ENSMUSG00000073490	Ifi207	protein_coding	765.523	1168.66	1172.22	1153.54	1680.64	1660.27	1266.81	0.121799	3.11323	0.00185053	0.0808705	-0.379109
ENSMUSG00000014158	Trpv4	protein_coding	71.8614	58.7265	67.7416	113.04	101.765	105.378	86.4188	0.132065	3.11169	0.00186021	0.0808951	-0.411588
ENSMUSG00000062210	Tnfaip8	protein_coding	1033.01	1067.84	1107.43	845.575	854.424	844.149	958.738	0.0927926	-3.10864	0.00187951	0.0814677	0.288487
ENSMUSG00000032845	Alpk2	protein_coding	1890.35	1474.04	1439.26	2026.71	2236.82	2029.1	1849.38	0.103035	3.10661	0.00189245	0.081498	-0.320095
ENSMUSG00000047798	Cd300lf	protein_coding	24.9519	7.8302	9.81762	46.2841	29.2197	34.7525	25.476	0.120834	3.10689	0.00189069	0.081498	-0.371836
ENSMUSG00000102329	Gm10851	antisense_RNA	3.9923	6.85143	9.81762	8.01071	32.2424	34.7525	15.9445	0.104554	3.10199	0.00192225	0.0825143	-0.313937
ENSMUSG00000038403	Hfe2	protein_coding	1437.23	1353.65	1153.57	1678.69	1607.08	1784.71	1502.49	0.0983839	3.09596	0.00196176	0.0836704	-0.304601
ENSMUSG00000049907	Rasl11b	protein_coding	350.324	222.182	189.48	142.413	140.053	195.062	206.586	0.131673	-3.09612	0.00196072	0.0836704	0.407442
ENSMUSG00000045312	Lhfpl2	protein_coding	99.8074	135.071	124.684	153.093	202.523	190.578	150.959	0.127578	3.09465	0.00197047	0.0837733	-0.395015
ENSMUSG00000002020	Ltbp2	protein_coding	19.9615	31.3208	25.5258	37.3833	80.6061	47.084	40.3136	0.129941	3.08786	0.002016	0.0854361	-0.399816
ENSMUSG00000040483	Xaf1	protein_coding	198.617	249.588	228.75	279.485	315.371	359.856	271.945	0.118181	3.08264	0.00205174	0.0866747	-0.364391
ENSMUSG00000091649	Phf11b	protein_coding	20.9596	42.0874	20.617	27.5924	77.5833	91.9259	46.7943	0.125467	3.08164	0.00205863	0.0866904	-0.382013
ENSMUSG00000040428	Plekha4	protein_coding	26.948	41.1086	29.4529	47.1742	80.6061	62.7787	48.0114	0.133273	3.07573	0.00209989	0.088149	-0.409595
ENSMUSG00000028919	Arhgef19	protein_coding	189.634	169.328	153.155	206.498	273.053	262.325	208.999	0.12247	3.07096	0.00213375	0.0892887	-0.376214
ENSMUSG00000015340	Cybb	protein_coding	244.528	320.06	145.301	404.986	597.492	512.319	370.781	0.129468	3.06562	0.00217219	0.0906122	-0.392323
ENSMUSG00000018428	Akap1	protein_coding	1245.6	1110.91	1050.49	1483.76	1349.14	1510.05	1291.66	0.0968473	3.06293	0.00219181	0.0911452	-0.29665
ENSMUSG00000005583	Mef2c	protein_coding	751.55	718.421	789.336	553.629	604.545	602.003	669.914	0.0989185	-3.06061	0.00220883	0.0915668	0.302786
ENSMUSG00000026858	Miga2	protein_coding	304.413	270.142	227.769	367.602	386.909	348.646	317.58	0.114719	3.05167	0.00227576	0.0939354	-0.350205
ENSMUSG00000034614	Pik3ip1	protein_coding	305.411	396.404	377.978	284.825	272.045	186.094	303.793	0.12312	-3.05109	0.00228009	0.0939354	0.375873
ENSMUSG00000023913	Pla2g7	protein_coding	57.8883	33.2784	42.2158	94.3483	73.553	70.626	61.985	0.134543	3.04626	0.0023171	0.0951658	-0.410243
ENSMUSG00000030847	Bag3	protein_coding	3224.78	2793.43	2790.17	2301.74	1831.77	2554.87	2582.79	0.105681	-3.04415	0.00233339	0.0955397	0.321705
ENSMUSG00000028339	Col15a1	protein_coding	414.201	546.157	532.115	714.733	808.076	554.919	595.033	0.117238	3.03952	0.00236957	0.0967236	-0.356406
ENSMUSG00000005800	Mmp8	protein_coding	99.8074	56.769	33.3799	117.49	107.811	123.315	89.7621	0.13429	3.03691	0.00239014	0.097265	-0.407009
ENSMUSG00000004609	Cd33	protein_coding	103.8	110.602	92.2856	194.927	146.098	131.163	129.813	0.129958	3.03349	0.00241742	0.0980751	-0.3947
ENSMUSG00000012443	Kif11	protein_coding	78.8479	75.3657	78.5409	44.5039	28.2121	57.1734	60.4407	0.134514	-3.03046	0.00244183	0.0982962	0.407634
ENSMUSG00000026043	Col3a1	protein_coding	536.964	740.933	659.744	1024.48	983.394	698.413	773.988	0.118007	3.03006	0.00244503	0.0982962	-0.35761
ENSMUSG00000057880	Abat	protein_coding	193.626	199.67	179.662	225.19	330.485	269.051	232.948	0.122321	3.03089	0.00243831	0.0982962	-0.370844
ENSMUSG00000034460	Six4	protein_coding	73.8575	81.2384	76.5774	44.5039	47.3561	43.7209	61.209	0.134331	-3.02596	0.00247846	0.0990415	0.407247
ENSMUSG00000075307	Klhl41	protein_coding	1500.11	1489.7	1420.61	1233.65	887.674	1214.09	1290.97	0.106959	-3.0264	0.00247485	0.0990415	0.323717
ENSMUSG00000001131	Timp1	protein_coding	140.728	175.201	143.337	196.707	210.583	265.688	188.708	0.124581	3.0249	0.00248717	0.0990921	-0.37695
ENSMUSG00000000253	Gmpr	protein_coding	755.542	736.039	753.011	573.211	550.136	630.029	666.328	0.0990386	-3.02348	0.00249886	0.0992607	0.299473
ENSMUSG00000016487	Ppfibp1	protein_coding	842.375	908.304	1076.99	1289.72	1249.39	1131.14	1082.99	0.102674	3.02013	0.00252668	0.0997915	-0.310116
ENSMUSG00000030474	Siglece	protein_coding	25.9499	22.5118	20.617	48.0642	52.3939	39.2367	34.7956	0.131643	3.02006	0.00252722	0.0997915	-0.397895
ENSMUSG00000038582	Pptc7	protein_coding	1320.45	1220.53	1120.19	1467.74	1543.61	1607.58	1380.02	0.0949425	3.01374	0.00258046	0.101592	-0.28614
ENSMUSG00000068742	Cry2	protein_coding	291.438	261.333	238.568	203.828	180.356	181.61	226.189	0.118187	-3.01111	0.00260294	0.102175	0.356114
ENSMUSG00000033799	Fam208b	protein_coding	377.272	414.022	417.249	425.457	584.394	693.928	485.387	0.11966	3.00111	0.00268999	0.105281	-0.359072
ENSMUSG00000023809	Rps6ka2	protein_coding	328.366	404.234	340.671	490.433	510.841	434.966	418.252	0.110336	2.99931	0.00270589	0.105321	-0.331029
ENSMUSG00000041741	Pde3a	protein_coding	1140.8	984.648	1149.64	1483.76	1406.58	1280.24	1240.94	0.0981211	2.99832	0.00271473	0.105321	-0.294222
ENSMUSG00000044350	Lacc1	protein_coding	79.846	99.8351	58.9057	104.139	150.129	135.647	104.75	0.133305	2.99906	0.00270812	0.105321	-0.39984
ENSMUSG00000027555	Car13	protein_coding	39.923	80.2596	68.7233	82.7773	113.856	134.526	86.6775	0.134571	2.9915	0.00277614	0.10739	-0.40218
ENSMUSG00000071856	Mcc	protein_coding	130.748	138.007	125.665	222.52	200.508	155.826	162.212	0.125929	2.98933	0.00279593	0.10753	-0.37682
ENSMUSG00000078616	Trim30c	protein_coding	20.9596	32.2996	37.3069	49.8444	63.4773	60.5366	44.0707	0.133254	2.9902	0.00278795	0.10753	-0.39846
ENSMUSG00000066861	Oas1g	protein_coding	14.9711	39.151	28.4711	36.4932	72.5455	67.2629	43.1491	0.129122	2.98407	0.00284439	0.109079	-0.383216
ENSMUSG00000004105	Angptl2	protein_coding	548.941	628.374	531.133	400.535	474.568	421.514	500.844	0.107187	-2.98185	0.00286515	0.109245	0.319672
ENSMUSG00000035105	Egln3	protein_coding	604.833	418.916	358.343	652.428	582.379	741.012	559.652	0.122338	2.98246	0.00285939	0.109245	-0.364836
ENSMUSG00000020275	Rel	protein_coding	828.402	831.959	621.455	907.88	977.349	1204.01	895.175	0.113088	2.9728	0.002951	0.112197	-0.336173
ENSMUSG00000016024	Lbp	protein_coding	120.767	118.432	163.954	205.608	224.689	168.157	166.935	0.127294	2.96939	0.00298396	0.113127	-0.378258
ENSMUSG00000024471	Myot	protein_coding	1003.06	771.275	736.321	1117.05	1115.39	1063.87	967.828	0.10667	2.96582	0.00301876	0.114121	-0.316382
ENSMUSG00000023947	Nfkbie	protein_coding	78.8479	136.05	90.3221	126.391	219.652	155.826	134.515	0.133744	2.96321	0.00304451	0.114388	-0.396138
ENSMUSG00000030247	Kcnj8	protein_coding	157.696	217.288	212.061	150.423	124.939	121.073	163.913	0.12674	-2.96385	0.00303814	0.114388	0.376008
ENSMUSG00000037016	Frem2	protein_coding	208.598	141.922	177.699	94.3483	123.932	130.042	146.09	0.129541	-2.96162	0.00306021	0.114388	0.383699
ENSMUSG00000052981	Ube2ql1	protein_coding	101.804	101.793	86.395	124.611	151.136	163.673	121.569	0.12898	2.96219	0.00305462	0.114388	-0.382279
ENSMUSG00000010609	Psen2	protein_coding	76.8517	92.9837	100.14	117.49	161.212	137.889	114.428	0.130575	2.95632	0.00311338	0.11605	-0.386286
ENSMUSG00000024413	Npc1	protein_coding	466.101	383.68	434.92	359.592	294.212	297.078	372.597	0.112811	-2.95536	0.00312309	0.116087	0.333536
ENSMUSG00000020577	Tspan13	protein_coding	227.561	356.274	320.054	209.168	214.614	207.394	255.844	0.123097	-2.95327	0.00314429	0.116549	0.363678
ENSMUSG00000043263	Ifi209	protein_coding	55.8922	105.708	66.7598	106.809	257.939	224.21	136.22	0.117177	2.94835	0.00319479	0.118092	-0.33591
ENSMUSG00000025221	Kcnip2	protein_coding	1249.59	1488.72	1333.23	1015.58	1104.3	1106.47	1216.32	0.0967846	-2.94324	0.00324792	0.119723	0.284873
ENSMUSG00000049871	Nlrc3	protein_coding	19.9615	18.5967	10.7994	31.1527	51.3864	30.2683	27.0275	0.125033	2.9421	0.00325991	0.119833	-0.366268
ENSMUSG00000035356	Nfkbiz	protein_coding	416.197	617.607	504.626	634.626	1277.61	1280.24	788.483	0.129272	2.93863	0.00329671	0.120852	-0.375603
ENSMUSG00000046031	Fam26f	protein_coding	6.98652	5.87265	1.96352	10.6809	22.1667	21.2999	11.495	0.101339	2.93472	0.00333845	0.122046	-0.290341
ENSMUSG00000021702	Thbs4	protein_coding	81.8421	89.0686	86.395	112.15	129.977	152.462	108.649	0.130251	2.93312	0.00335569	0.12234	-0.382269
ENSMUSG00000036098	Myrf	protein_coding	23.9538	28.3845	31.4164	57.8551	72.5455	34.7525	41.4846	0.131569	2.92004	0.00349983	0.127247	-0.383992
ENSMUSG00000044456	Rin3	protein_coding	233.549	284.824	273.912	328.439	455.424	325.104	316.875	0.120319	2.91599	0.00354558	0.128559	-0.350935
ENSMUSG00000053581	Zfand2a	protein_coding	239.538	212.394	211.079	161.994	135.015	172.641	188.777	0.121733	-2.91501	0.00355677	0.128614	0.355055
ENSMUSG00000026073	Il1r2	protein_coding	26.948	18.5967	18.6535	43.6138	41.3106	44.8419	32.3274	0.130655	2.90883	0.00362781	0.130474	-0.380017
ENSMUSG00000074364	Ehd2	protein_coding	512.012	745.827	714.723	544.728	464.492	424.877	567.777	0.117331	-2.90963	0.00361852	0.130474	0.34147
ENSMUSG00000019979	Apaf1	protein_coding	302.417	402.277	493.826	461.061	659.962	593.034	485.429	0.123562	2.90785	0.00363918	0.13053	-0.359267
ENSMUSG00000049037	Clec4a1	protein_coding	45.9114	42.0874	37.3069	68.536	90.6818	59.4155	57.3232	0.134543	2.90634	0.00365678	0.130809	-0.391428
ENSMUSG00000054204	Alkal2	protein_coding	3.9923	3.9151	2.94529	9.79086	11.0833	24.663	9.39832	0.0953121	2.90336	0.00369187	0.13171	-0.268668
ENSMUSG00000049225	Pdp1	protein_coding	369.288	397.383	452.592	298.176	257.939	343.041	353.07	0.115222	-2.9009	0.00372094	0.132392	0.334309
ENSMUSG00000020077	Srgn	protein_coding	461.11	503.091	526.224	671.119	567.265	702.897	571.951	0.106199	2.89391	0.00380475	0.135013	-0.307369
ENSMUSG00000075289	Carns1	protein_coding	151.707	136.05	138.428	92.5682	90.6818	105.378	119.136	0.127814	-2.89274	0.00381896	0.135156	0.370055
ENSMUSG00000039497	Dse	protein_coding	78.8479	100.814	66.7598	131.732	131.992	116.589	104.456	0.131434	2.89081	0.00384252	0.13528	-0.380352
ENSMUSG00000052749	Trim30b	protein_coding	51.8999	35.2359	37.3069	78.3269	52.3939	93.0469	58.0351	0.134197	2.89079	0.00384277	0.13528	-0.387738
ENSMUSG00000083012	Fam220a	protein_coding	433.164	401.298	471.246	534.937	563.235	590.792	499.112	0.104494	2.889	0.00386468	0.135692	-0.301919
ENSMUSG00000035513	Ntng2	protein_coding	38.9249	47.96	46.1428	81.8872	69.5227	72.8681	59.551	0.13449	2.88708	0.00388834	0.136163	-0.388936
ENSMUSG00000084899	Gm15344	processed_transcript	61.8806	16.6392	17.6717	9.79086	9.06818	14.5736	21.604	0.110552	-2.8854	0.00390912	0.136532	0.311243
ENSMUSG00000073676	Hspe1	protein_coding	1221.64	920.049	901.257	692.481	615.629	908.048	876.518	0.11786	-2.88321	0.00393647	0.137127	0.339779
ENSMUSG00000036334	Igsf10	protein_coding	28.9442	22.5118	23.5623	49.8444	63.4773	34.7525	37.1821	0.131164	2.87895	0.00399001	0.13842	-0.377502
ENSMUSG00000038174	Fam126b	protein_coding	248.521	241.758	316.127	187.807	202.523	190.578	231.219	0.119706	-2.87861	0.00399438	0.13842	0.344747
ENSMUSG00000039519	Cyp7b1	protein_coding	6.98652	11.7453	15.7082	27.5924	30.2273	26.9051	19.8608	0.120023	2.87143	0.00408624	0.140505	-0.342999
ENSMUSG00000061436	Hipk2	protein_coding	1235.62	1261.64	865.914	1417	1468.04	1568.35	1302.76	0.110613	2.87205	0.00407817	0.140505	-0.317681
ENSMUSG00000079014	Serpina3i	protein_coding	9.98074	5.87265	10.7994	16.9115	30.2273	25.7841	16.5959	0.114266	2.87252	0.00407206	0.140505	-0.324897
ENSMUSG00000048489	8430408G22Rik	protein_coding	507.022	502.112	605.747	497.554	347.614	292.593	458.774	0.122918	-2.8703	0.00410083	0.140644	0.352941
ENSMUSG00000028163	Nfkb1	protein_coding	864.332	1092.31	987.652	1174.01	1209.09	1404.67	1122.01	0.103573	2.86803	0.00413041	0.141294	-0.297054
ENSMUSG00000058427	Cxcl2	protein_coding	306.409	395.425	427.066	444.149	1144.61	1440.55	693.034	0.112674	2.86092	0.00422419	0.144132	-0.31072
ENSMUSG00000001053	N4bp3	protein_coding	52.8979	79.2808	69.7051	56.0749	22.1667	22.421	50.4244	0.130836	-2.85939	0.00424463	0.144459	0.373793
ENSMUSG00000024924	Vldlr	protein_coding	5340.7	4440.7	4925.5	6091.7	6045.45	5911.28	5459.22	0.0900845	2.85794	0.00426406	0.14475	-0.257457
ENSMUSG00000044583	Tlr7	protein_coding	60.8825	91.0261	59.8875	128.171	126.955	87.4417	92.3939	0.133889	2.8562	0.00428745	0.145173	-0.382781
ENSMUSG00000025558	Dock9	protein_coding	769.515	776.169	831.552	975.526	1132.52	914.775	900.009	0.100919	2.85518	0.00430118	0.145269	-0.288167
ENSMUSG00000020205	Phlda1	protein_coding	334.355	329.847	284.711	196.707	163.227	292.593	266.907	0.126931	-2.85346	0.00432463	0.145691	0.362098
ENSMUSG00000022358	Fbxo32	protein_coding	2573.04	2635.84	2739.12	2203.83	2253.95	2078.42	2414.03	0.0872301	-2.84662	0.00441861	0.147858	0.248319
ENSMUSG00000050549	5730508B09Rik	protein_coding	47.9076	46.0025	60.8692	69.4261	91.6894	96.4101	68.7175	0.134373	2.84748	0.00440668	0.147858	-0.382786
ENSMUSG00000051335	Gfod1	protein_coding	511.014	636.204	649.926	777.929	710.341	856.48	690.316	0.107644	2.84635	0.00442229	0.147858	-0.306414
ENSMUSG00000022032	Scara5	protein_coding	123.761	108.644	119.775	178.906	173.303	152.462	142.809	0.125144	2.84456	0.00444722	0.148192	-0.356315
ENSMUSG00000026031	Cflar	protein_coding	1196.69	1505.36	1218.37	1328	1975.86	2020.13	1540.73	0.11638	2.84404	0.00445456	0.148192	-0.330954
ENSMUSG00000027544	Nfatc2	protein_coding	179.653	138.986	179.662	114.82	107.811	119.952	140.147	0.126821	-2.8412	0.00449446	0.149147	0.360589
ENSMUSG00000026932	Nacc2	protein_coding	217.58	190.861	176.717	248.332	279.098	272.415	230.834	0.117648	2.83895	0.00452621	0.149455	-0.334111
ENSMUSG00000030469	Zfp719	protein_coding	64.8748	65.578	59.8875	91.6781	103.78	102.015	81.3023	0.13248	2.83939	0.00451999	0.149455	-0.376587
ENSMUSG00000001119	Col6a1	protein_coding	442.147	529.518	431.975	677.35	640.818	531.377	542.197	0.110525	2.83697	0.00455441	0.150014	-0.313628
ENSMUSG00000047875	Gpr157	protein_coding	355.314	271.121	240.532	430.798	363.735	395.73	342.872	0.118933	2.82641	0.00470724	0.154284	-0.336233
ENSMUSG00000100826	Snhg14	processed_transcript	65.8729	50.8963	62.8327	106.809	88.6667	89.6838	77.4603	0.133425	2.82653	0.00470555	0.154284	-0.377662
ENSMUSG00000019558	Slc6a8	protein_coding	1756.61	1616.94	1512.89	2029.38	1959.73	2016.76	1815.39	0.0913517	2.82541	0.004722	0.154387	-0.258113
ENSMUSG00000067653	Ankrd23	protein_coding	46.9095	36.2147	27.4893	72.0964	49.3712	78.4733	51.7591	0.133794	2.82405	0.00474208	0.154664	-0.377702
ENSMUSG00000030889	Vwa3a	protein_coding	67.8691	56.769	40.2522	120.161	85.6439	72.8681	73.9271	0.134574	2.82122	0.0047841	0.155653	-0.379944
ENSMUSG00000030967	Zranb1	protein_coding	967.134	1042.4	1287.09	866.046	730.492	921.501	969.11	0.109347	-2.81542	0.00487131	0.158104	0.30787
ENSMUSG00000052593	Adam17	protein_coding	518.001	454.152	415.285	583.891	582.379	623.302	529.502	0.10565	2.81087	0.00494075	0.159967	-0.297001
ENSMUSG00000032776	Mctp2	protein_coding	14.9711	11.7453	9.81762	30.2627	33.25	22.421	20.4113	0.121121	2.80681	0.00500344	0.161604	-0.338778
ENSMUSG00000063060	Sox7	protein_coding	160.69	241.758	272.93	150.423	137.03	170.399	188.872	0.128902	-2.80554	0.00502323	0.16185	0.361704
ENSMUSG00000030156	Cd69	protein_coding	10.9788	18.5967	21.5988	17.8016	56.4242	47.084	28.7474	0.120729	2.80303	0.00506243	0.162719	-0.33456
ENSMUSG00000027257	Pacsin3	protein_coding	843.373	802.596	763.811	634.626	623.689	669.265	722.893	0.0975252	-2.79248	0.00523056	0.167718	0.272362
ENSMUSG00000045045	Lrfn4	protein_coding	38.9249	44.0449	33.3799	80.1071	52.3939	69.5049	53.0593	0.134362	2.78373	0.00537375	0.171895	-0.3744
ENSMUSG00000021622	Ckmt2	protein_coding	16765.7	16068.6	16140.2	12755.7	13130.7	14662.2	14920.5	0.0865096	-2.78092	0.00542047	0.172974	0.240576
ENSMUSG00000003282	Plag1	protein_coding	43.9153	59.7053	105.049	38.2734	47.3561	17.9368	52.0392	0.12934	-2.77811	0.00546754	0.173961	0.357994
ENSMUSG00000057193	Slc44a2	protein_coding	642.76	641.098	683.306	547.398	519.909	492.14	587.769	0.100233	-2.77752	0.00547754	0.173961	0.278455
ENSMUSG00000022221	Ripk3	protein_coding	48.9056	55.7902	79.5227	37.3833	29.2197	35.8735	47.7825	0.133702	-2.7761	0.00550146	0.174305	0.371346
ENSMUSG00000034810	Scn7a	protein_coding	332.359	326.911	404.486	475.302	540.061	404.698	413.969	0.114755	2.77006	0.0056046	0.17715	-0.317957
ENSMUSG00000027346	Gpcpd1	protein_coding	4043.2	3064.55	3918.21	2989.77	2764.79	2984.23	3294.12	0.100714	-2.76913	0.0056207	0.177239	0.278891
ENSMUSG00000033161	Atp1a1	protein_coding	7989.59	6122.24	5854.25	8235.01	8424.34	8647.76	7545.53	0.102087	2.76629	0.00566977	0.178363	-0.282397
ENSMUSG00000039126	Prune2	protein_coding	4276.75	2891.3	2826.49	4615.06	4292.27	4280.16	3863.67	0.112248	2.76499	0.00569239	0.178652	-0.310351
ENSMUSG00000029664	Tfpi2	protein_coding	70.8633	78.302	76.5774	89.8979	107.811	163.673	97.854	0.133829	2.76402	0.00570948	0.178767	-0.369708
ENSMUSG00000038418	Egr1	protein_coding	3788.69	4038.43	4626.06	2542.95	2944.14	3930.39	3645.11	0.112885	-2.76083	0.0057655	0.180098	0.311629
ENSMUSG00000004043	Stat5a	protein_coding	193.626	181.073	179.662	224.3	243.833	292.593	219.181	0.119737	2.75589	0.0058532	0.182409	-0.330046
ENSMUSG00000028832	Stmn1	protein_coding	55.8922	66.5567	54.9787	29.3726	34.2576	38.1156	46.5289	0.13417	-2.75447	0.00587864	0.182773	0.369739
ENSMUSG00000059839	Zfp874b	protein_coding	75.8537	93.9625	118.793	76.5467	49.3712	47.084	76.9352	0.134545	-2.75345	0.0058971	0.18292	0.370953
ENSMUSG00000053835	H2-T24	protein_coding	71.8614	98.8563	66.7598	97.0186	122.924	154.705	102.021	0.133459	2.74829	0.00599067	0.18496	-0.366701
ENSMUSG00000057914	Cacnb2	protein_coding	683.681	583.35	671.525	422.787	545.099	524.65	571.849	0.109173	-2.74862	0.00598463	0.18496	0.300083
ENSMUSG00000032484	Ngp	protein_coding	11.9769	15.6604	22.5805	24.9222	45.3409	39.2367	26.6196	0.124745	2.74651	0.00602336	0.185186	-0.340992
ENSMUSG00000039109	F13a1	protein_coding	356.313	454.152	375.033	610.594	579.356	418.151	465.6	0.118498	2.74637	0.00602581	0.185186	-0.325527
ENSMUSG00000061086	Myl4	protein_coding	12.975	12.7241	55.9604	35.6031	330.485	234.299	113.674	0.0652473	2.74515	0.00604838	0.185451	-0.142556
ENSMUSG00000026034	Clk1	protein_coding	1283.52	1563.1	1941.92	1401.87	1158.71	986.522	1389.28	0.117371	-2.74078	0.0061293	0.1875	0.321701
ENSMUSG00000022383	Ppara	protein_coding	358.309	277.972	266.057	398.755	480.614	350.888	355.433	0.1195	2.73686	0.00620295	0.189318	-0.327122
ENSMUSG00000021871	Pnp	protein_coding	172.667	256.439	216.969	195.817	388.924	411.424	273.707	0.13266	2.73317	0.00627281	0.191012	-0.362245
ENSMUSG00000056367	Actr3b	protein_coding	425.18	508.963	590.039	375.613	371.795	409.182	446.795	0.112866	-2.72994	0.00633465	0.192455	0.30816
ENSMUSG00000046798	Cldn12	protein_coding	415.199	292.654	277.839	215.399	222.674	267.93	281.949	0.123571	-2.72838	0.00636455	0.192923	0.337152
ENSMUSG00000019850	Tnfaip3	protein_coding	702.644	1245	858.06	1154.43	2637.83	2790.29	1564.71	0.118431	2.72632	0.0064044	0.193689	-0.315203
ENSMUSG00000032135	Mcam	protein_coding	363.299	525.602	574.331	363.152	331.492	376.672	422.425	0.120019	-2.72306	0.00646807	0.195171	0.32686
ENSMUSG00000023004	Tuba1b	protein_coding	358.309	427.725	342.635	305.297	266	282.504	330.412	0.113457	-2.72119	0.00650475	0.195834	0.308848
ENSMUSG00000042115	Klhdc8a	protein_coding	74.8556	76.3445	72.6504	105.919	102.773	128.92	93.5772	0.131401	2.72013	0.00652566	0.19602	-0.357686
ENSMUSG00000026384	Ptpn4	protein_coding	796.463	809.447	964.09	1108.15	1011.61	1104.23	965.664	0.100288	2.71753	0.00657705	0.197119	-0.272554
ENSMUSG00000020689	Itgb3	protein_coding	40.921	34.2571	34.3617	70.3162	52.3939	65.0208	49.5451	0.13436	2.71536	0.00662031	0.19797	-0.365246
ENSMUSG00000029730	Mcm7	protein_coding	82.8402	81.2384	92.2856	66.7559	36.2727	52.6892	68.6803	0.134528	-2.70702	0.00678911	0.202562	0.36464
ENSMUSG00000036006	Ripor2	protein_coding	128.752	112.559	83.4497	168.225	148.114	156.947	133.008	0.129123	2.69842	0.00696703	0.207406	-0.348652
ENSMUSG00000042688	Mapk6	protein_coding	482.07	513.857	548.805	550.959	670.038	830.696	599.404	0.114875	2.6959	0.00701984	0.208511	-0.309669
ENSMUSG00000048126	Col6a3	protein_coding	241.534	272.1	227.769	396.085	364.742	258.962	293.532	0.122103	2.69145	0.00711427	0.210845	-0.328787
ENSMUSG00000033624	Pdpr	protein_coding	1018.04	1044.35	1102.52	1317.32	1221.18	1327.32	1171.79	0.0926967	2.68452	0.0072634	0.214787	-0.248858
ENSMUSG00000074793	Hspa12b	protein_coding	101.804	121.368	114.866	100.579	59.447	47.084	90.858	0.134455	-2.68242	0.00730911	0.215659	0.361182
ENSMUSG00000036067	Slc2a6	protein_coding	15.9692	22.5118	6.87233	26.7024	40.303	34.7525	24.5185	0.121667	2.68018	0.0073582	0.216627	-0.323925
ENSMUSG00000021273	Fdft1	protein_coding	389.249	406.192	434.92	320.428	305.295	332.951	364.839	0.107693	-2.6765	0.00743962	0.217103	0.288307
ENSMUSG00000025225	Nfkb2	protein_coding	418.193	548.114	451.61	610.594	598.5	610.971	539.664	0.107602	2.67709	0.00742644	0.217103	-0.2881
ENSMUSG00000028024	Enpep	protein_coding	89.8267	94.9412	114.866	160.214	143.076	130.042	122.161	0.128752	2.6766	0.00743742	0.217103	-0.344968
ENSMUSG00000032089	Il10ra	protein_coding	50.9018	59.7053	56.9422	92.5682	94.7121	75.1102	71.6566	0.133795	2.67819	0.00740216	0.217103	-0.35885
ENSMUSG00000020375	Rufy1	protein_coding	312.397	356.274	333.799	234.981	279.098	249.994	294.424	0.113173	-2.67255	0.0075276	0.218235	0.302545
ENSMUSG00000024235	Map3k8	protein_coding	300.42	358.232	319.073	376.503	417.136	497.745	378.185	0.114137	2.67263	0.00752585	0.218235	-0.305058
ENSMUSG00000037242	Clic4	protein_coding	7640.26	8188.44	8232.07	8452.18	9930.67	12003.1	9074.45	0.103305	2.6728	0.00752212	0.218235	-0.276105
ENSMUSG00000040829	Zmynd15	protein_coding	28.9442	20.5543	14.7264	31.1527	63.4773	36.9946	32.6416	0.126739	2.67076	0.0075679	0.218451	-0.336977
ENSMUSG00000043230	Fam124b	protein_coding	0.998074	0.978776	5.89057	19.5817	8.06061	8.96838	7.41302	0.0851709	2.67139	0.0075537	0.218451	-0.218471
ENSMUSG00000025880	Smad7	protein_coding	139.73	117.453	154.137	105.919	68.5152	99.7732	114.255	0.131655	-2.66864	0.00761599	0.219364	0.351602
ENSMUSG00000011148	Adssl1	protein_coding	1058.96	1201.94	1149.64	935.472	877.599	960.738	1030.72	0.0954589	-2.66404	0.00772092	0.220308	0.254322
ENSMUSG00000020828	Pld2	protein_coding	77.8498	74.3869	76.5774	52.5146	45.3409	44.8419	61.9186	0.134304	-2.66617	0.00767205	0.220308	0.358702
ENSMUSG00000026819	Slc25a25	protein_coding	350.324	330.826	328.89	381.844	436.28	498.866	387.838	0.111457	2.66292	0.00774652	0.220308	-0.296813
ENSMUSG00000038332	Sesn1	protein_coding	2098.95	2397.02	2826.49	2045.4	1913.39	1876.63	2192.98	0.1017	-2.66285	0.00774812	0.220308	0.270822
ENSMUSG00000051067	Lingo3	protein_coding	39.923	47.96	33.3799	67.646	54.4091	84.0786	54.5661	0.134374	2.66301	0.00774449	0.220308	-0.357865
ENSMUSG00000055065	Ddx17	protein_coding	1123.83	1022.82	1060.3	1375.17	1261.48	1277.99	1186.93	0.0930963	2.6646	0.00770797	0.220308	-0.248079
ENSMUSG00000098123	Gm4518	processed_pseudogene	18.9634	21.5331	26.5076	14.2413	3.02273	6.72629	15.1657	0.109077	-2.66087	0.00779395	0.221139	0.287175
ENSMUSG00000038374	Rbm8a	protein_coding	322.378	322.996	323	254.562	233.758	256.72	285.569	0.111149	-2.6599	0.00781648	0.221306	0.295746
ENSMUSG00000002985	Apoe	protein_coding	1243.6	1337.99	1271.38	1669.79	1641.34	1418.13	1430.37	0.0951134	2.65887	0.00784023	0.221507	-0.252911
ENSMUSG00000036944	Tmem71	protein_coding	131.746	124.305	146.282	100.579	93.7045	82.9575	113.262	0.128954	-2.65425	0.00794853	0.224091	0.342693
ENSMUSG00000020589	Fam49a	protein_coding	114.779	109.623	122.72	153.984	169.273	162.552	138.822	0.124952	2.6525	0.00798979	0.224304	-0.33165
ENSMUSG00000101122	Gm17971	processed_pseudogene	29.9422	22.5118	21.5988	10.6809	8.06061	12.3315	17.521	0.117447	-2.65291	0.00798003	0.224304	0.309747
ENSMUSG00000053024	Cntn2	protein_coding	40.921	21.5331	31.4164	34.7131	114.864	44.8419	48.0482	0.125547	2.65062	0.00803433	0.22508	-0.329945
ENSMUSG00000032870	Smap2	protein_coding	486.062	517.772	511.498	585.672	630.742	689.444	570.198	0.102455	2.64968	0.0080567	0.225232	-0.271487
ENSMUSG00000038807	Rap1gap2	protein_coding	772.51	840.768	788.355	1020.03	983.394	941.68	891.123	0.0950693	2.64724	0.00811519	0.226392	-0.251694
ENSMUSG00000022816	Fstl1	protein_coding	913.238	1060.01	911.075	1103.7	1408.59	1141.23	1089.64	0.104891	2.64258	0.00822763	0.227844	-0.277193
ENSMUSG00000024238	Zeb1	protein_coding	721.608	779.105	717.668	853.585	973.318	915.896	826.863	0.0976306	2.64244	0.00823098	0.227844	-0.257997
ENSMUSG00000028318	Polr1e	protein_coding	144.721	154.647	179.662	105.029	121.917	112.105	136.347	0.126576	-2.64112	0.00826318	0.227844	0.334525
ENSMUSG00000032035	Ets1	protein_coding	946.175	1157.89	1049.5	1350.25	1172.82	1434.94	1185.26	0.10227	2.64144	0.00825542	0.227844	-0.270148
ENSMUSG00000037306	Man1c1	protein_coding	236.544	230.991	228.75	297.286	341.568	278.02	268.86	0.114605	2.64342	0.00820743	0.227844	-0.303055
ENSMUSG00000045534	Kcna5	protein_coding	356.313	467.855	435.902	524.256	577.341	523.529	480.866	0.10967	2.64084	0.00826999	0.227844	-0.289666
ENSMUSG00000003228	Grk5	protein_coding	271.476	269.163	247.404	335.56	365.75	321.741	301.849	0.111408	2.63993	0.00829241	0.227888	-0.294197
ENSMUSG00000028713	Cyp4b1	protein_coding	227.561	184.01	199.298	159.324	138.038	146.857	175.848	0.122514	-2.63868	0.00832295	0.227888	0.323492
ENSMUSG00000033526	Ppip5k1	protein_coding	1104.87	757.572	708.832	1214.96	1049.89	1146.83	997.159	0.116292	2.6388	0.00832007	0.227888	-0.306869
ENSMUSG00000032267	Usp28	protein_coding	1998.14	1894.91	2020.47	1668.01	1400.53	1733.14	1785.87	0.096631	-2.63786	0.008343	0.227968	0.254905
ENSMUSG00000038067	Csf3	protein_coding	75.8537	142.901	156.1	152.203	413.106	523.529	243.949	0.102532	2.63597	0.0083898	0.228309	-0.256976
ENSMUSG00000064367	mt-Nd5	protein_coding	391121	330720	412654	431728	456403	507905	421755	0.0963714	2.63654	0.00837561	0.228309	-0.254084
ENSMUSG00000034910	Pygo1	protein_coding	366.293	367.041	380.924	421.007	508.826	496.624	423.452	0.107686	2.63504	0.00841272	0.228465	-0.283781
ENSMUSG00000044786	Zfp36	protein_coding	1671.77	1811.71	1937.02	1815.76	2511.89	2672.58	2070.12	0.110149	2.63233	0.00848006	0.229825	-0.289932
ENSMUSG00000000385	Tmprss2	protein_coding	3.9923	10.7665	15.7082	7.12063	35.2652	47.084	19.9895	0.10389	2.62779	0.00859427	0.232447	-0.264497
ENSMUSG00000036594	H2-Aa	protein_coding	328.366	317.123	311.218	469.961	466.508	331.83	370.835	0.116674	2.62675	0.00862046	0.232683	-0.306581
ENSMUSG00000041476	Smpx	protein_coding	2654.88	2644.65	2760.71	2047.18	2211.63	2408.01	2454.51	0.0909144	-2.62109	0.00876482	0.2361	0.238295
ENSMUSG00000015837	Sqstm1	protein_coding	4178.94	3908.25	4624.1	3847.81	3196.03	3292.52	3841.27	0.0966523	-2.61514	0.00891916	0.239772	0.252764
ENSMUSG00000002266	Zim1	protein_coding	22.9557	27.4057	11.7811	39.1635	52.3939	32.5104	31.0351	0.127232	2.61197	0.00900226	0.241518	-0.331472
ENSMUSG00000053846	Lipg	protein_coding	32.9365	57.7478	49.0881	47.1742	87.6591	114.347	64.8254	0.132956	2.60924	0.0090744	0.242964	-0.345812
ENSMUSG00000025076	Casp7	protein_coding	52.8979	81.2384	70.6868	82.7773	124.939	112.105	87.4408	0.133933	2.60786	0.00911111	0.243427	-0.349304
ENSMUSG00000042717	Ppp1r3a	protein_coding	4860.62	3756.54	3974.17	3453.5	3398.55	3364.26	3801.28	0.0976127	-2.60721	0.00912828	0.243427	0.254499
ENSMUSG00000033022	Cdo1	protein_coding	19.9615	26.4269	34.3617	46.2841	71.5379	34.7525	38.8874	0.130043	2.59997	0.00932306	0.248124	-0.337566
ENSMUSG00000038366	Lasp1	protein_coding	144.721	246.651	187.516	154.874	114.864	125.557	162.364	0.130629	-2.59705	0.00940279	0.249746	0.339446
ENSMUSG00000022894	Adamts5	protein_coding	114.779	112.559	104.067	163.774	205.545	116.589	136.219	0.131113	2.5897	0.00960601	0.253123	-0.339758
ENSMUSG00000033102	Cdc14b	protein_coding	143.723	136.05	142.355	185.136	187.409	200.668	165.89	0.121442	2.59095	0.00957116	0.253123	-0.314799
ENSMUSG00000035236	Scai	protein_coding	367.291	259.376	237.586	215.399	194.462	216.362	248.413	0.124149	-2.59019	0.0095922	0.253123	0.321643
ENSMUSG00000047976	Kcna1	protein_coding	6.98652	2.93633	6.87233	15.1313	20.1515	14.5736	11.1086	0.103178	2.5899	0.00960027	0.253123	-0.263507
ENSMUSG00000028859	Csf3r	protein_coding	125.757	80.2596	45.161	135.292	146.098	125.557	109.688	0.134574	2.58479	0.00974393	0.25625	-0.347518
ENSMUSG00000098188	Sowahc	protein_coding	105.796	137.029	137.447	175.345	175.318	177.126	151.343	0.125062	2.58246	0.00980976	0.257472	-0.32316
ENSMUSG00000032816	Igdcc4	protein_coding	100.806	125.283	106.03	137.962	177.333	155.826	133.873	0.127746	2.5811	0.00984866	0.257984	-0.329886
ENSMUSG00000027951	Adar	protein_coding	200.613	383.68	313.182	327.549	492.705	477.566	365.882	0.129819	2.57923	0.00990215	0.258876	-0.334707
ENSMUSG00000021870	Slmap	protein_coding	3378.48	2836.49	3461.69	2432.58	2607.61	2839.61	2926.08	0.0973922	-2.57408	0.0100506	0.261728	0.250694
ENSMUSG00000031652	N4bp1	protein_coding	486.062	745.827	754.975	736.095	918.909	1033.61	779.246	0.121212	2.57454	0.0100374	0.261728	-0.312024
ENSMUSG00000038151	Prdm1	protein_coding	59.8845	49.9176	41.234	82.7773	83.6288	71.747	64.8649	0.134387	2.57174	0.010119	0.262996	-0.345987
ENSMUSG00000103313	Gm38357	TEC	74.8556	83.1959	69.7051	69.4261	149.121	149.099	99.2339	0.134562	2.56904	0.0101979	0.26453	-0.345208
ENSMUSG00000074519	Zfp971	protein_coding	158.694	108.644	140.392	168.225	240.811	174.883	165.275	0.12914	2.56686	0.0102623	0.265682	-0.331554
ENSMUSG00000035112	Wnk4	protein_coding	133.742	167.371	132.538	106.809	96.7273	102.015	123.2	0.12827	-2.5559	0.0105913	0.273666	0.328127
ENSMUSG00000019302	Atp6v0a1	protein_coding	717.615	729.188	683.306	843.794	900.773	854.238	788.152	0.0956378	2.5543	0.0106401	0.273865	-0.244304
ENSMUSG00000025429	Pstpip2	protein_coding	136.736	125.283	126.647	186.026	171.288	172.641	153.104	0.123113	2.55471	0.0106277	0.273865	-0.314729
ENSMUSG00000026822	Lcn2	protein_coding	709.631	401.298	383.869	702.272	999.515	1117.68	719.045	0.129213	2.55077	0.0107485	0.275587	-0.326772
ENSMUSG00000048572	Tmem252	protein_coding	349.326	403.256	502.662	461.951	560.212	658.055	489.244	0.119626	2.55093	0.0107437	0.275587	-0.305133
ENSMUSG00000066258	Trim12a	protein_coding	232.551	276.993	262.13	244.772	427.212	410.303	308.994	0.126838	2.54965	0.010783	0.275942	-0.323311
ENSMUSG00000020482	Ccdc117	protein_coding	322.378	274.057	333.799	259.903	199.5	242.146	271.964	0.118064	-2.54251	0.0110058	0.281103	0.300291
ENSMUSG00000003382	Etv3	protein_coding	509.018	677.313	624.4	724.524	816.136	752.223	683.936	0.107309	2.54128	0.0110447	0.281556	-0.272721
ENSMUSG00000036362	P2ry13	protein_coding	13.973	15.6604	5.89057	24.0321	33.25	23.542	19.3914	0.117825	2.54034	0.0110744	0.281772	-0.297417
ENSMUSG00000018411	Mapt	protein_coding	832.394	787.914	710.795	944.373	959.212	948.406	863.849	0.0970448	2.53779	0.0111554	0.283292	-0.246294
ENSMUSG00000034751	Mast4	protein_coding	686.675	746.806	731.412	997.778	876.591	808.275	807.923	0.101476	2.53481	0.011251	0.285175	-0.257256
ENSMUSG00000045392	Olfr1033	protein_coding	352.32	424.789	408.413	454.83	509.833	547.071	449.543	0.109164	2.53267	0.0113197	0.286372	-0.276493
ENSMUSG00000063524	Eno1	protein_coding	675.696	674.376	661.707	583.001	529.985	516.803	606.928	0.0998318	-2.53126	0.0113654	0.286981	0.252744
ENSMUSG00000001156	Mxd1	protein_coding	146.717	193.798	213.042	227.86	257.939	266.809	217.694	0.122774	2.53018	0.0114005	0.287323	-0.310705
ENSMUSG00000030729	Pgm2l1	protein_coding	156.698	188.904	165.918	149.533	110.833	98.6522	145.09	0.128702	-2.52758	0.0114852	0.288911	0.325667
ENSMUSG00000019866	Crybg1	protein_coding	89.8267	146.816	161.009	122.831	253.909	246.63	170.17	0.134371	2.5263	0.011527	0.289415	-0.339003
ENSMUSG00000043557	Mdga1	protein_coding	89.8267	103.75	106.03	68.536	57.4318	75.1102	83.4475	0.132733	-2.52496	0.011571	0.289973	0.335431
ENSMUSG00000000078	Klf6	protein_coding	2278.6	2342.21	2405.32	1801.52	1590.96	2232.01	2108.44	0.104158	-2.52109	0.0116992	0.29229	0.262587
ENSMUSG00000027859	Ngf	protein_coding	208.598	261.333	156.1	228.75	289.174	383.398	254.559	0.130089	2.52084	0.0117074	0.29229	-0.327789
ENSMUSG00000014778	Fhod1	protein_coding	68.8671	85.1535	69.7051	48.9543	45.3409	48.205	61.0377	0.134426	-2.51981	0.011742	0.292604	0.339137
ENSMUSG00000021094	Dhrs7	protein_coding	191.63	200.649	229.732	139.742	148.114	172.641	180.418	0.122552	-2.51842	0.0117882	0.293207	0.308718
ENSMUSG00000025271	Pfkfb1	protein_coding	156.698	165.413	161.991	119.271	131.992	95.289	138.442	0.12679	-2.517	0.0118358	0.293842	0.319428
ENSMUSG00000022360	Atad2	protein_coding	48.9056	88.0898	92.2856	51.6246	47.3561	39.2367	61.2497	0.134283	-2.5115	0.0120219	0.297444	0.337441
ENSMUSG00000032518	Rpsa	protein_coding	2861.48	2896.2	2991.43	2260.8	2395.01	2647.91	2675.47	0.0904327	-2.51139	0.0120256	0.297444	0.227111
ENSMUSG00000035186	Ubd	protein_coding	4.99037	8.80898	4.90881	5.34047	37.2803	16.8157	13.0241	0.0967761	2.51057	0.0120536	0.297582	-0.235123
ENSMUSG00000029207	Apbb2	protein_coding	532.972	608.798	567.458	413.886	425.197	514.561	510.479	0.107828	-2.50901	0.0121071	0.298349	0.270548
ENSMUSG00000021260	Hhipl1	protein_coding	41.9191	63.6204	46.1428	40.0535	24.1818	16.8157	38.7889	0.13003	-2.5061	0.0122073	0.298606	0.32604
ENSMUSG00000021458	2010111I01Rik	protein_coding	700.648	558.881	638.145	487.763	423.182	568.371	562.832	0.111841	-2.50653	0.0121922	0.298606	0.280339
ENSMUSG00000027366	Sppl2a	protein_coding	1037	1004.22	1032.81	1064.53	1404.56	1362.07	1150.87	0.103544	2.50641	0.0121965	0.298606	-0.25952
ENSMUSG00000050071	Bex1	protein_coding	5.98845	17.618	11.7811	1.78016	4.0303	3.36314	7.42686	0.0882217	-2.50632	0.0121994	0.298606	0.214194
ENSMUSG00000022367	Has2	protein_coding	67.8691	60.6841	59.8875	82.7773	87.6591	115.468	79.0575	0.133533	2.5024	0.0123354	0.300529	-0.334228
ENSMUSG00000034997	Htr2a	protein_coding	22.9557	19.5755	19.6352	7.12063	6.04545	12.3315	14.6107	0.111996	-2.50188	0.0123536	0.300529	0.277392
ENSMUSG00000066621	Tecpr1	protein_coding	340.343	351.38	281.766	482.423	409.076	372.188	372.863	0.114953	2.50199	0.0123496	0.300529	-0.287701
ENSMUSG00000021948	Prkcd	protein_coding	133.742	136.05	125.665	182.466	180.356	171.52	154.967	0.12267	2.50026	0.0124102	0.300806	-0.3069
ENSMUSG00000026879	Gsn	protein_coding	6145.14	7836.08	7194.35	8514.49	9491.36	7962.8	7857.37	0.0988226	2.50054	0.0124006	0.300806	-0.247108
ENSMUSG00000022514	Il1rap	protein_coding	55.8922	60.6841	71.6686	88.1178	104.788	89.6838	78.4724	0.133231	2.49842	0.0124748	0.301274	-0.333162
ENSMUSG00000042129	Rassf4	protein_coding	236.544	217.288	148.246	328.439	286.152	225.331	240.333	0.127519	2.49856	0.01247	0.301274	-0.318727
ENSMUSG00000031137	Fgf13	protein_coding	500.035	578.456	551.75	404.986	437.288	461.872	489.064	0.105179	-2.4962	0.0125531	0.302504	0.26257
ENSMUSG00000047330	Kcne4	protein_coding	59.8845	86.1323	114.866	148.643	113.856	130.042	108.904	0.133422	2.49569	0.0125712	0.302504	-0.33313
ENSMUSG00000076617	Ighm	IG_C_gene	13.973	22.5118	17.6717	29.3726	30.2273	48.205	26.9936	0.125956	2.49355	0.0126473	0.303787	-0.312981
ENSMUSG00000021892	Sh3bp5	protein_coding	610.822	582.371	623.419	732.535	733.515	747.739	671.733	0.0969524	2.4899	0.012778	0.306372	-0.24142
ENSMUSG00000002007	Srpk3	protein_coding	193.626	175.201	171.808	125.501	127.962	145.736	156.639	0.12348	-2.48711	0.0128784	0.307435	0.307232
ENSMUSG00000039616	Mocos	protein_coding	50.9018	42.0874	44.1793	60.5253	80.6061	76.2312	59.0885	0.134553	2.48675	0.0128916	0.307435	-0.334734
ENSMUSG00000070436	Serpinh1	protein_coding	2112.92	1840.1	1552.17	1376.95	1331.01	1656.91	1645.01	0.10777	-2.48754	0.012863	0.307435	0.268074
ENSMUSG00000025934	Gsta3	protein_coding	101.804	107.665	120.757	73.8765	84.6364	68.3839	92.8537	0.131511	-2.48284	0.0130341	0.310276	0.326862
ENSMUSG00000015396	Cd83	protein_coding	116.775	157.583	99.1579	168.225	184.386	172.641	149.795	0.128413	2.48174	0.0130743	0.3105	-0.318815
ENSMUSG00000030994	D7Ertd443e	protein_coding	20.9596	8.80898	15.7082	43.6138	34.2576	19.0578	23.7343	0.120178	2.48004	0.0131368	0.3105	-0.296559
ENSMUSG00000031662	Snx20	protein_coding	14.9711	11.7453	9.81762	18.6916	30.2273	31.3893	19.4737	0.119171	2.48045	0.0131217	0.3105	-0.293831
ENSMUSG00000041633	Kctd12b	protein_coding	120.767	92.0049	107.012	89.8979	67.5076	51.5682	88.1263	0.133854	-2.4807	0.0131125	0.3105	0.332543
ENSMUSG00000032212	Sltm	protein_coding	627.789	634.247	665.634	503.784	513.864	552.676	582.999	0.0999339	-2.47871	0.0131858	0.310801	0.247727
ENSMUSG00000074102	Rbm15b	protein_coding	252.513	195.755	218.933	179.796	136.023	174.883	192.984	0.123933	-2.47843	0.0131962	0.310801	0.307291
ENSMUSG00000037820	Tgm2	protein_coding	3030.15	3010.71	3028.73	3451.72	3595.03	3610.89	3287.88	0.0837549	2.47613	0.0132815	0.312257	-0.207389
ENSMUSG00000041836	Ptpre	protein_coding	126.755	129.198	119.775	126.391	182.371	237.662	153.692	0.131337	2.47525	0.0133141	0.312471	-0.324932
ENSMUSG00000026193	Fn1	protein_coding	509.018	712.549	699.996	857.146	822.182	767.918	728.135	0.110806	2.46963	0.0135254	0.316327	-0.273678
ENSMUSG00000032366	Tpm1	protein_coding	67761.3	69694.7	73185.4	55605	57459	64555.5	64710.2	0.0876156	-2.46961	0.013526	0.316327	0.216376
ENSMUSG00000038545	Cul7	protein_coding	177.657	176.18	165.918	142.413	121.917	116.589	150.112	0.124349	-2.46819	0.0135799	0.317032	0.307189
ENSMUSG00000021500	Ddx46	protein_coding	666.714	641.098	725.522	585.672	523.939	539.224	613.695	0.101355	-2.46627	0.013653	0.318155	0.250007
ENSMUSG00000029322	Plac8	protein_coding	11.9769	11.7453	12.7629	29.3726	27.2045	21.2999	19.0604	0.120323	2.46566	0.0136762	0.318155	-0.296004
ENSMUSG00000069792	Wfdc17	protein_coding	95.8151	130.177	64.7963	143.303	131.992	156.947	120.505	0.133025	2.46504	0.0136998	0.318155	-0.327928
ENSMUSG00000015947	Fcgr1	protein_coding	31.9384	54.8114	40.2522	56.965	87.6591	65.0208	56.1078	0.13417	2.46359	0.0137555	0.318566	-0.330479
ENSMUSG00000038550	Ciart	protein_coding	88.8286	34.2571	32.3981	24.9222	27.2045	28.0262	39.2728	0.126448	-2.46333	0.0137653	0.318566	0.309723
ENSMUSG00000002944	Cd36	protein_coding	23290.1	16915.2	18579.8	26374.8	23073.5	23378.3	21935.3	0.103099	2.46207	0.0138137	0.319131	-0.253832
ENSMUSG00000006403	Adamts4	protein_coding	544.949	732.124	1102.52	1349.36	1213.12	2158.02	1183.35	0.124495	2.4607	0.0138666	0.319536	-0.302481
ENSMUSG00000032501	Trib1	protein_coding	772.51	849.577	811.917	718.293	488.674	689.444	721.736	0.112903	-2.46006	0.0138916	0.319536	0.277771
ENSMUSG00000074240	Cib3	protein_coding	5.98845	2.93633	1.96352	11.571	17.1288	8.96838	8.09275	0.0919423	2.45975	0.0139033	0.319536	-0.221006
ENSMUSG00000019362	D8Ertd738e	protein_coding	476.081	470.791	440.811	395.195	351.644	363.219	416.29	0.10571	-2.45683	0.014017	0.321593	0.259772
ENSMUSG00000036461	Elf1	protein_coding	371.284	488.409	576.294	542.948	656.939	690.565	554.407	0.11855	2.45606	0.0140469	0.321645	-0.291155
ENSMUSG00000112023	Lilr4b	protein_coding	238.54	210.437	225.805	372.053	248.871	281.383	262.848	0.122057	2.45553	0.0140676	0.321645	-0.299843
ENSMUSG00000003033	Ap1m1	protein_coding	297.426	272.1	274.893	375.613	351.644	341.919	318.933	0.109827	2.45356	0.0141451	0.322311	-0.269541
ENSMUSG00000046546	Fam43a	protein_coding	357.311	427.725	522.297	544.728	503.788	667.023	503.812	0.117937	2.4537	0.0141397	0.322311	-0.289378
ENSMUSG00000042579	4632404H12Rik	lincRNA	51.8999	45.0237	42.2158	73.8765	66.5	76.2312	59.2912	0.134476	2.45252	0.0141859	0.322686	-0.330109
ENSMUSG00000026580	Selp	protein_coding	684.679	1097.21	1248.8	1259.46	2005.08	2284.69	1429.99	0.12948	2.45032	0.0142731	0.324116	-0.314811
ENSMUSG00000021764	Ndufs4	protein_coding	1780.56	1826.4	1928.18	1499.78	1453.93	1664.76	1692.27	0.0923062	-2.44882	0.0143326	0.324688	0.226043
ENSMUSG00000066979	Bub3	protein_coding	273.472	257.418	245.44	215.399	189.424	190.578	228.622	0.116544	-2.44845	0.0143471	0.324688	0.285496
ENSMUSG00000048279	Sacs	protein_coding	1114.85	869.153	1008.27	747.666	683.136	925.985	891.51	0.110743	-2.44537	0.0144702	0.326918	0.270798
ENSMUSG00000027221	Chst1	protein_coding	33.9345	27.4057	24.544	16.0214	15.1136	10.0894	21.1848	0.122213	-2.44069	0.0146594	0.330632	0.297832
ENSMUSG00000016520	Lnx2	protein_coding	212.59	187.925	191.444	246.552	261.97	260.083	226.76	0.116076	2.4392	0.0147198	0.331431	-0.283211
ENSMUSG00000036053	Fmnl2	protein_coding	268.482	292.654	293.547	340.9	360.712	381.156	322.909	0.10989	2.4383	0.0147563	0.331693	-0.267985
ENSMUSG00000107962	Gm43980	TEC	76.8517	74.3869	117.811	127.281	139.045	124.436	109.969	0.131955	2.43562	0.0148663	0.333601	-0.321556
ENSMUSG00000026623	Lpgat1	protein_coding	1460.18	1288.07	1236.04	1496.22	1655.45	1672.6	1468.09	0.0962184	2.43367	0.0149465	0.334838	-0.234165
ENSMUSG00000018566	Slc2a4	protein_coding	2916.37	3292.6	3155.38	2682.7	2512.89	2697.24	2876.2	0.0888539	-2.43054	0.0150762	0.336828	0.215967
ENSMUSG00000044991	1110034G24Rik	protein_coding	140.728	147.795	131.556	125.501	95.7197	59.4155	116.786	0.133335	-2.43031	0.015086	0.336828	0.324454
ENSMUSG00000040289	Hey1	protein_coding	26.948	25.4482	46.1428	22.252	9.06818	15.6947	24.259	0.121292	-2.42861	0.0151568	0.337841	0.293415
ENSMUSG00000001918	Slc1a5	protein_coding	247.522	297.548	290.601	219.849	220.659	204.031	246.702	0.116052	-2.4245	0.0153296	0.339984	0.281485
ENSMUSG00000027217	Tspan18	protein_coding	34.9326	33.2784	31.4164	56.0749	62.4697	45.9629	44.0225	0.1339	2.42515	0.015302	0.339984	-0.325069
ENSMUSG00000109136	Gm45114	TEC	9.98074	8.80898	3.92705	11.571	18.1364	30.2683	13.7821	0.105859	2.42468	0.015322	0.339984	-0.25238
ENSMUSG00000020241	Col6a2	protein_coding	427.176	476.664	383.869	617.714	614.621	437.209	492.875	0.116537	2.42252	0.0154134	0.341274	-0.282376
ENSMUSG00000020810	Cygb	protein_coding	204.605	319.081	264.094	200.268	209.576	169.278	227.817	0.125041	-2.42121	0.0154687	0.341931	0.302883
ENSMUSG00000018339	Gpx3	protein_coding	1029.01	1165.72	978.816	1215.85	1449.9	1227.55	1177.81	0.101161	2.41797	0.0156073	0.344421	-0.244611
ENSMUSG00000078945	Naip2	protein_coding	19.9615	14.6816	19.6352	25.8123	44.3333	34.7525	26.5294	0.126208	2.41409	0.0157745	0.347535	-0.303874
ENSMUSG00000047098	Rnf31	protein_coding	262.494	277.972	254.276	316.868	349.629	340.798	300.34	0.110859	2.40921	0.0159872	0.351639	-0.26713
ENSMUSG00000001627	Ifrd1	protein_coding	1793.54	1411.39	1532.53	1215.85	860.47	1513.41	1387.87	0.120535	-2.40144	0.0163306	0.357664	0.28942
ENSMUSG00000028060	2810403A07Rik	protein_coding	591.858	546.157	636.182	533.157	436.28	449.54	532.196	0.107201	-2.39943	0.0164206	0.357664	0.257276
ENSMUSG00000030275	Etnk1	protein_coding	719.612	987.585	1025.94	864.266	1384.41	1420.37	1067.03	0.123428	2.40075	0.0163617	0.357664	-0.29626
ENSMUSG00000033032	Afap1l1	protein_coding	727.596	858.386	749.084	648.867	672.053	571.734	704.62	0.103315	-2.39945	0.0164195	0.357664	0.247934
ENSMUSG00000036002	Fam214b	protein_coding	235.546	241.758	247.404	196.707	185.394	176.004	213.802	0.116791	-2.40182	0.0163138	0.357664	0.280658
ENSMUSG00000050296	Abca12	protein_coding	77.8498	64.5992	108.976	57.8551	50.3788	53.8103	68.9115	0.134531	-2.39939	0.0164224	0.357664	0.322999
ENSMUSG00000043099	Hic1	protein_coding	18.9634	27.4057	38.2887	21.3619	10.0758	4.48419	20.0966	0.113309	-2.39875	0.0164509	0.3577	0.269994
ENSMUSG00000017002	Slpi	protein_coding	1.99615	3.9151	7.85409	16.0214	8.06061	19.0578	9.4842	0.0950845	2.39522	0.0166106	0.357742	-0.222761
ENSMUSG00000019082	Slc25a22	protein_coding	205.603	151.71	139.41	259.903	213.606	202.91	195.524	0.126137	2.39528	0.0166077	0.357742	-0.302271
ENSMUSG00000019820	Utrn	protein_coding	1314.46	1421.18	1298.87	1579.89	1642.35	1571.71	1471.41	0.0903346	2.39786	0.016491	0.357742	-0.216616
ENSMUSG00000029627	Zkscan14	protein_coding	50.9018	44.0449	54.9787	37.3833	26.197	23.542	39.5079	0.132632	-2.39661	0.0165477	0.357742	0.318346
ENSMUSG00000032060	Cryab	protein_coding	13843.3	11802.1	10453.8	9548.76	8797.14	10963.8	10901.5	0.103099	-2.39514	0.0166141	0.357742	0.246931
ENSMUSG00000042406	Atf4	protein_coding	1370.36	1407.48	1476.57	1139.3	938.053	1338.53	1278.38	0.106602	-2.39685	0.0165367	0.357742	0.255507
ENSMUSG00000029377	Ereg	protein_coding	71.8614	89.0686	45.161	92.5682	103.78	117.71	86.6916	0.13428	2.39378	0.0166758	0.358018	-0.321377
ENSMUSG00000052013	Btla	protein_coding	10.9788	9.78776	3.92705	14.2413	22.1667	24.663	14.2941	0.109118	2.39367	0.0166808	0.358018	-0.258133
ENSMUSG00000026463	Atp2b4	protein_coding	457.118	561.817	463.392	647.977	715.379	524.65	561.722	0.112968	2.39055	0.0168232	0.359335	-0.270098
ENSMUSG00000028278	Rragd	protein_coding	1552.01	1340.92	1435.34	1740.1	1702.8	1716.32	1581.25	0.0917702	2.39112	0.0167969	0.359335	-0.219439
ENSMUSG00000036528	Ppfibp2	protein_coding	205.603	268.185	214.024	326.659	303.28	267.93	264.28	0.118726	2.39112	0.0167972	0.359335	-0.284001
ENSMUSG00000015316	Slamf1	protein_coding	5.98845	16.6392	9.81762	24.0321	16.1212	34.7525	17.8918	0.113496	2.38749	0.0169637	0.361756	-0.26831
ENSMUSG00000019929	Dcn	protein_coding	3968.34	4796	4881.32	5394.77	6130.09	5062.65	5038.86	0.0990442	2.38472	0.017092	0.363574	-0.236193
ENSMUSG00000032508	Myd88	protein_coding	278.463	372.914	333.799	347.131	447.364	501.108	380.13	0.1198	2.38389	0.0171309	0.363574	-0.285568
ENSMUSG00000097347	Gm17275	lincRNA	30.9403	37.1935	47.1246	24.0321	23.1742	14.5736	29.5064	0.128216	-2.38422	0.0171153	0.363574	0.30575
ENSMUSG00000019832	Rab32	protein_coding	19.9615	22.5118	8.83586	37.3833	26.197	38.1156	25.5008	0.123684	2.3826	0.017191	0.363652	-0.293618
ENSMUSG00000030411	Nova2	protein_coding	45.9114	40.1298	54.9787	31.1527	18.1364	31.3893	36.9497	0.131423	-2.38205	0.0172165	0.363652	0.312948
ENSMUSG00000068614	Actc1	protein_coding	97612.7	78036.8	66761.8	63003.3	61772.5	70247.1	72905.7	0.106257	-2.38288	0.0171779	0.363652	0.253189
ENSMUSG00000071656	Lrrn4cl	protein_coding	34.9326	40.1298	55.9604	24.0321	29.2197	20.1789	34.0756	0.130443	-2.381	0.0172657	0.364111	0.310529
ENSMUSG00000108324	Gm44608	TEC	2.99422	5.87265	5.89057	16.0214	13.0985	13.4526	9.55499	0.0993049	2.38041	0.0172935	0.364121	-0.233348
ENSMUSG00000025066	Sfr1	protein_coding	820.417	763.445	830.57	597.243	679.106	705.139	732.653	0.10037	-2.37661	0.0174727	0.366276	0.238543
ENSMUSG00000028793	Rnf19b	protein_coding	360.305	466.876	384.851	410.326	591.447	585.187	466.499	0.119168	2.37649	0.0174784	0.366276	-0.283178
ENSMUSG00000041957	Pkp2	protein_coding	1795.54	1680.56	1905.6	1422.35	1535.55	1557.13	1649.45	0.092217	-2.37748	0.0174315	0.366276	0.219246
ENSMUSG00000033487	Fndc3a	protein_coding	408.212	469.812	496.771	450.38	649.886	698.413	528.912	0.119013	2.37535	0.0175322	0.366825	-0.282664
ENSMUSG00000008301	Phax	protein_coding	159.692	166.392	197.334	145.083	119.902	119.952	151.392	0.125705	-2.3729	0.0176492	0.368117	0.298523
ENSMUSG00000051375	Pcdh1	protein_coding	223.569	320.06	286.674	256.343	178.341	170.399	239.231	0.126906	-2.37345	0.0176226	0.368117	0.301384
ENSMUSG00000000982	Ccl3	protein_coding	66.871	92.9837	26.5076	92.5682	224.689	188.336	115.326	0.0999863	2.37102	0.0177389	0.369407	-0.226722
ENSMUSG00000020385	Clk4	protein_coding	612.818	626.416	645.017	524.256	528.977	496.624	572.352	0.0993991	-2.36883	0.0178446	0.371029	0.235492
ENSMUSG00000018920	Cxcl16	protein_coding	135.738	140.944	141.374	142.413	227.712	208.515	166.116	0.128148	2.36656	0.0179541	0.372413	-0.30325
ENSMUSG00000041445	Mmrn2	protein_coding	389.249	429.682	442.775	387.184	329.477	244.388	370.459	0.119691	-2.36629	0.0179672	0.372413	0.283351
ENSMUSG00000031980	Agt	protein_coding	149.711	138.986	107.994	196.707	150.129	198.425	156.992	0.127666	2.36438	0.0180603	0.37376	-0.301955
ENSMUSG00000025982	Sf3b1	protein_coding	5008.34	3879.87	4380.62	3779.27	3083.18	3911.33	4007.1	0.103944	-2.3638	0.0180886	0.373766	0.245701
ENSMUSG00000029093	Sorcs2	protein_coding	133.742	164.434	175.735	114.82	121.917	109.863	136.752	0.126936	-2.36289	0.0181331	0.374105	0.300135
ENSMUSG00000058715	Fcer1g	protein_coding	104.798	109.623	112.903	151.313	161.212	133.405	128.876	0.126647	2.36216	0.0181686	0.374256	-0.299382
ENSMUSG00000026409	Pfkfb2	protein_coding	356.313	262.312	317.109	480.642	388.924	349.767	359.178	0.119195	2.36074	0.0182385	0.374536	-0.281471
ENSMUSG00000110631	Gm42047	lincRNA	14.9711	79.2808	53.0151	14.2413	28.2121	28.0262	36.2911	0.118634	-2.36113	0.0182191	0.374536	0.276499
ENSMUSG00000045672	Col27a1	protein_coding	92.8209	84.1747	63.8145	82.7773	146.098	132.284	100.328	0.134013	2.35741	0.0184031	0.377334	-0.31575
ENSMUSG00000007812	Zfp655	protein_coding	547.943	514.836	543.896	495.774	339.553	424.877	477.813	0.113685	-2.35537	0.0185042	0.378243	0.267828
ENSMUSG00000068079	Tcf15	protein_coding	25.9499	29.3633	27.4893	20.4718	7.05303	11.2105	20.2563	0.118759	-2.35542	0.0185016	0.378243	0.278969
ENSMUSG00000021112	Mpp5	protein_coding	834.39	742.891	781.482	645.307	557.189	711.865	712.187	0.104491	-2.35412	0.0185667	0.378938	0.245993
ENSMUSG00000040040	Ift88	protein_coding	52.8979	69.4931	64.7963	47.1742	39.2955	29.1472	50.4674	0.134208	-2.35151	0.0186972	0.381015	0.316119
ENSMUSG00000079419	Ms4a6c	protein_coding	45.9114	63.6204	46.1428	81.8872	83.6288	70.626	65.3028	0.134391	2.35074	0.018736	0.381222	-0.316241
ENSMUSG00000002346	Slc25a42	protein_coding	393.241	305.378	255.258	412.996	404.038	420.393	365.217	0.118275	2.34483	0.0190358	0.381507	-0.27736
ENSMUSG00000020009	Ifngr1	protein_coding	691.666	682.207	533.097	764.577	934.023	711.865	719.572	0.112112	2.34351	0.0191035	0.381507	-0.262751
ENSMUSG00000020354	Sgcd	protein_coding	342.34	293.633	272.93	363.152	384.894	400.214	342.86	0.111828	2.3409	0.0192373	0.381507	-0.261804
ENSMUSG00000021136	Smoc1	protein_coding	43.9153	93.9625	65.778	45.394	41.3106	36.9946	54.5592	0.133569	-2.34109	0.0192273	0.381507	0.312721
ENSMUSG00000026365	Cfh	protein_coding	1754.61	2139.6	2375.86	2530.49	2944.14	2312.72	2342.91	0.107012	2.34714	0.018918	0.381507	-0.251175
ENSMUSG00000028955	Vamp3	protein_coding	626.791	603.905	615.565	498.444	517.894	506.713	561.552	0.0991158	-2.34888	0.0188298	0.381507	0.232838
ENSMUSG00000032300	1700017B05Rik	protein_coding	142.725	149.753	96.2126	202.938	160.205	174.883	154.453	0.128988	2.3434	0.0191088	0.381507	-0.302412
ENSMUSG00000038296	Galnt18	protein_coding	55.8922	81.2384	92.2856	97.9086	131.992	107.621	94.4896	0.133432	2.3451	0.0190221	0.381507	-0.313005
ENSMUSG00000041773	Enc1	protein_coding	304.413	392.489	414.303	445.929	459.455	506.713	420.55	0.113251	2.34175	0.0191935	0.381507	-0.265225
ENSMUSG00000042359	Osbpl6	protein_coding	177.657	189.882	233.659	254.562	248.871	281.383	231.003	0.119407	2.34305	0.0191268	0.381507	-0.279836
ENSMUSG00000044469	Tnfaip8l1	protein_coding	48.9056	58.7265	68.7233	46.2841	29.2197	31.3893	47.2081	0.133681	-2.34623	0.0189644	0.381507	0.314066
ENSMUSG00000052496	Pkdrej	protein_coding	59.8845	48.9388	45.161	76.5467	91.6894	66.1418	64.727	0.134459	2.34708	0.0189212	0.381507	-0.315847
ENSMUSG00000057315	Arhgap24	protein_coding	156.698	172.265	185.553	242.101	199.5	233.178	198.216	0.120603	2.34199	0.0191811	0.381507	-0.282566
ENSMUSG00000057637	Prdm2	protein_coding	532.972	572.584	537.024	661.328	668.023	658.055	604.998	0.0985133	2.3456	0.0189967	0.381507	-0.231093
ENSMUSG00000058975	Kcnc1	protein_coding	7.9846	15.6604	9.81762	26.7024	25.1894	20.1789	17.5889	0.11699	2.34571	0.0189911	0.381507	-0.273343
ENSMUSG00000060187	Lrrc10	protein_coding	1825.48	2080.88	1859.46	1333.34	1695.75	1691.66	1747.76	0.101994	-2.34302	0.0191281	0.381507	0.238969
ENSMUSG00000109052	Gm45012	antisense_RNA	29.9422	15.6604	20.617	41.8337	40.303	36.9946	30.8918	0.129226	2.34678	0.0189362	0.381507	-0.303044
ENSMUSG00000026435	Slc45a3	protein_coding	47.9076	50.8963	33.3799	54.2948	81.6136	73.9891	57.0136	0.134424	2.33886	0.0193429	0.381966	-0.314298
ENSMUSG00000045193	Cirbp	protein_coding	233.549	237.842	312.2	210.059	214.614	162.552	228.469	0.123447	-2.33936	0.0193168	0.381966	0.288937
ENSMUSG00000078429	Ctdsp2	protein_coding	802.452	1169.64	1121.17	947.934	710.341	739.891	915.238	0.116989	-2.33878	0.0193466	0.381966	0.273639
ENSMUSG00000019878	Hsf2	protein_coding	232.551	194.776	227.769	145.973	156.174	192.82	191.677	0.122866	-2.33792	0.0193912	0.38228	0.287268
ENSMUSG00000014226	Cacybp	protein_coding	841.377	776.169	819.771	599.913	655.932	742.133	739.216	0.101953	-2.33658	0.0194609	0.382925	0.238219
ENSMUSG00000020684	Rasl10b	protein_coding	633.777	576.499	421.176	665.779	671.045	744.376	618.775	0.114511	2.33619	0.0194815	0.382925	-0.267518
ENSMUSG00000025645	Ccdc51	protein_coding	43.9153	42.0874	46.1428	25.8123	26.197	25.7841	34.9898	0.13227	-2.33466	0.0195614	0.383929	0.30899
ENSMUSG00000061816	Myl1	protein_coding	219.576	303.42	252.313	180.686	185.394	221.967	227.226	0.122144	-2.33347	0.0196236	0.384582	0.285049
ENSMUSG00000096957	E230013L22Rik	bidirectional_promoter_lncRNA	122.763	88.0898	149.228	141.522	202.523	167.036	145.194	0.131337	2.33292	0.0196526	0.384584	-0.306395
ENSMUSG00000052331	Ankrd44	protein_coding	114.779	110.602	100.14	142.413	162.22	137.889	128.007	0.126903	2.32597	0.02002	0.391199	-0.295345
ENSMUSG00000011008	Mcoln2	protein_coding	65.8729	82.2171	92.2856	107.699	116.879	116.589	96.9238	0.131434	2.3218	0.0202439	0.394994	-0.305343
ENSMUSG00000020733	Slc9a3r1	protein_coding	30.9403	52.8539	47.1246	54.2948	84.6364	70.626	56.746	0.134228	2.32099	0.0202873	0.395261	-0.311429
ENSMUSG00000033318	Gstt2	protein_coding	26.948	19.5755	22.5805	6.23055	18.1364	5.60524	16.5127	0.111556	-2.31899	0.0203954	0.396786	0.256106
ENSMUSG00000090698	Apold1	protein_coding	504.028	565.732	902.239	828.663	832.258	960.738	765.61	0.123578	2.31685	0.0205121	0.398474	-0.286279
ENSMUSG00000104271	Gm37891	TEC	16.9673	7.8302	16.6899	3.56031	7.05303	3.36314	9.24398	0.0958631	-2.31597	0.0205598	0.398817	0.217821
ENSMUSG00000073982	Rhog	protein_coding	137.734	174.222	155.118	194.037	196.477	227.573	180.86	0.122544	2.31495	0.0206159	0.399324	-0.28375
ENSMUSG00000007041	Clic1	protein_coding	304.413	412.065	420.194	314.198	235.773	317.256	333.983	0.12114	-2.31322	0.0207106	0.399881	0.280268
ENSMUSG00000018930	Ccl4	protein_coding	111.784	149.753	46.1428	175.345	242.826	258.962	164.135	0.113502	2.31362	0.0206886	0.399881	-0.256884
ENSMUSG00000022665	Ccdc80	protein_coding	609.823	728.209	721.595	866.046	911.856	751.102	764.772	0.104557	2.31278	0.0207348	0.399881	-0.241843
ENSMUSG00000022014	Epsti1	protein_coding	13.973	19.5755	9.81762	28.4825	28.2121	29.1472	21.5347	0.122381	2.30973	0.020903	0.40196	-0.281925
ENSMUSG00000029004	Kmt2e	protein_coding	614.814	645.992	710.795	551.849	563.235	498.866	597.592	0.102624	-2.3102	0.0208773	0.40196	0.237117
ENSMUSG00000000555	Itga5	protein_coding	1372.35	1447.61	1369.56	1247.89	859.462	1238.76	1255.94	0.110415	-2.30761	0.0210209	0.403643	0.2548
ENSMUSG00000029614	Rpl6	protein_coding	1609.89	1669.79	1758.34	1351.14	1413.63	1495.48	1549.71	0.0912343	-2.30526	0.0211519	0.405574	0.210321
ENSMUSG00000006369	Fbln1	protein_coding	345.334	438.491	439.829	498.444	541.068	488.777	458.657	0.109823	2.3029	0.0212843	0.407525	-0.252946
ENSMUSG00000047250	Ptgs1	protein_coding	57.8883	80.2596	84.4315	51.6246	42.3182	51.5682	61.3484	0.134561	-2.30024	0.0214345	0.409812	0.309754
ENSMUSG00000064080	Fbln2	protein_coding	669.708	776.169	671.525	1048.51	955.182	688.323	801.57	0.114965	2.29898	0.021506	0.41059	-0.264338
ENSMUSG00000025001	Hells	protein_coding	11.9769	26.4269	17.6717	8.01071	10.0758	4.48419	13.1077	0.106476	-2.29785	0.0215705	0.410642	0.242294
ENSMUSG00000036905	C1qb	protein_coding	280.459	354.317	279.802	457.5	372.803	345.283	348.361	0.11768	2.29814	0.0215539	0.410642	-0.270533
ENSMUSG00000042659	Arrdc4	protein_coding	359.307	623.48	523.279	538.497	835.28	658.055	589.65	0.126321	2.29474	0.0217481	0.413431	-0.289827
ENSMUSG00000019942	Cdk1	protein_coding	4.99037	18.5967	20.617	5.34047	6.04545	3.36314	9.82553	0.0946836	-2.29374	0.0218057	0.413935	0.212552
ENSMUSG00000020696	Rffl	protein_coding	87.8305	101.793	90.3221	115.71	134.008	136.768	111.072	0.129116	2.29225	0.0218912	0.414966	-0.296088
ENSMUSG00000004814	Ccl24	protein_coding	17.9653	20.5543	16.6899	31.1527	24.1818	49.3261	26.645	0.125321	2.29022	0.0220088	0.416603	-0.285966
ENSMUSG00000096188	Cmtm4	protein_coding	201.611	194.776	213.042	261.683	266	247.752	230.811	0.115293	2.28803	0.0221357	0.418408	-0.263881
ENSMUSG00000019970	Sgk1	protein_coding	896.271	804.554	935.619	834.894	681.121	597.518	791.663	0.109637	-2.28383	0.0223815	0.421856	0.250437
ENSMUSG00000113940	AC159244.4	lincRNA	25.9499	13.7029	19.6352	7.12063	6.04545	12.3315	14.1309	0.109418	-2.28398	0.022373	0.421856	0.247027
ENSMUSG00000019828	Grm1	protein_coding	462.108	343.55	288.638	530.487	461.47	433.845	420.016	0.120866	2.28189	0.0224956	0.423338	-0.275841
ENSMUSG00000051344	Plekhm3	protein_coding	82.8402	116.474	96.2126	138.852	137.03	131.163	117.095	0.129268	2.28142	0.0225237	0.423338	-0.295109
ENSMUSG00000037999	Arap2	protein_coding	279.461	291.675	301.401	342.68	373.811	368.825	326.309	0.109086	2.28064	0.0225699	0.423607	-0.248821
ENSMUSG00000007039	Ddah2	protein_coding	47.9076	56.769	66.7598	38.2734	39.2955	29.1472	46.3587	0.133969	-2.27866	0.0226873	0.425126	0.305632
ENSMUSG00000022419	Deptor	protein_coding	335.353	297.548	259.185	372.053	394.97	356.493	335.934	0.112934	2.27787	0.0227342	0.425126	-0.257295
ENSMUSG00000029101	Rgs12	protein_coding	89.8267	122.347	101.121	146.863	158.189	125.557	123.984	0.12919	2.27766	0.0227467	0.425126	-0.294455
ENSMUSG00000033253	Szt2	protein_coding	167.676	141.922	103.085	187.807	198.492	174.883	162.311	0.127895	2.27667	0.0228061	0.425639	-0.291269
ENSMUSG00000023961	Enpp4	protein_coding	510.016	564.754	575.312	540.278	818.152	742.133	625.107	0.115378	2.27586	0.0228544	0.425944	-0.262568
ENSMUSG00000007739	Cct4	protein_coding	1400.3	1343.86	1433.37	1168.67	1143.6	1230.91	1286.79	0.0909553	-2.27153	0.0231149	0.426616	0.206613
ENSMUSG00000044573	Acp1	protein_coding	228.559	192.819	231.696	171.785	155.167	174.883	192.485	0.120606	-2.27329	0.0230086	0.426616	0.274274
ENSMUSG00000045658	Pid1	protein_coding	124.759	138.007	131.556	190.477	177.333	154.705	152.806	0.124261	2.27446	0.0229383	0.426616	-0.28282
ENSMUSG00000055053	Nfic	protein_coding	915.234	1132.44	1035.76	826.883	878.606	849.754	939.78	0.0997522	-2.27287	0.0230341	0.426616	0.226735
ENSMUSG00000063919	Srrm4	protein_coding	50.9018	34.2571	38.2887	82.7773	59.447	52.6892	53.0602	0.134131	2.27216	0.0230767	0.426616	-0.305043
ENSMUSG00000073940	Hbb-bt	protein_coding	9.98074	29.3633	35.3434	45.394	27.2045	72.8681	36.6923	0.122692	2.27211	0.0230799	0.426616	-0.27664
ENSMUSG00000097000	Gm17435	antisense_RNA	10.9788	13.7029	8.83586	17.8016	24.1818	29.1472	17.4414	0.116797	2.2719	0.0230926	0.426616	-0.263799
ENSMUSG00000014773	Dll1	protein_coding	29.9422	63.6204	68.7233	56.0749	89.6742	123.315	71.8917	0.132802	2.26957	0.0232335	0.42821	-0.300533
ENSMUSG00000078919	Dpm1	protein_coding	46.9095	37.1935	58.9057	31.1527	27.2045	26.9051	38.0452	0.132241	-2.26848	0.0232999	0.42884	0.300127
ENSMUSG00000026078	Pdcl3	protein_coding	508.02	469.812	530.151	404.986	420.159	410.303	457.239	0.10381	-2.2671	0.0233842	0.429205	0.235378
ENSMUSG00000089809	Rasgef1b	protein_coding	582.875	418.916	383.869	367.602	257.939	409.182	403.397	0.12588	-2.2672	0.0233782	0.429205	0.285366
ENSMUSG00000026991	Pkp4	protein_coding	1479.15	1409.44	1449.08	1845.13	1695.75	1588.52	1577.85	0.0924431	2.26459	0.0235379	0.430838	-0.209355
ENSMUSG00000031636	Pdlim3	protein_coding	150.709	137.029	178.681	98.7987	115.871	128.92	135.001	0.128152	-2.26483	0.0235231	0.430838	0.290279
ENSMUSG00000112148	Lilrb4a	protein_coding	98.8094	109.623	106.03	156.654	126.955	142.373	123.407	0.127628	2.26382	0.0235853	0.431111	-0.28913
ENSMUSG00000038866	Zcchc2	protein_coding	209.596	337.678	309.255	303.517	434.265	410.303	334.102	0.125855	2.26201	0.0236969	0.432557	-0.28465
ENSMUSG00000001027	Scn4a	protein_coding	239.538	219.246	169.845	318.648	227.712	284.746	243.289	0.124021	2.26078	0.0237728	0.433349	-0.280456
ENSMUSG00000014602	Kif1a	protein_coding	5.98845	9.78776	11.7811	19.5817	25.1894	16.8157	14.8574	0.112249	2.25963	0.0238441	0.434053	-0.25213
ENSMUSG00000033705	Stard9	protein_coding	100.806	184.01	139.41	112.15	96.7273	86.3207	119.904	0.132934	-2.25602	0.0240695	0.437558	0.300097
ENSMUSG00000025402	Nab2	protein_coding	41.9191	41.1086	55.9604	60.5253	77.5833	73.9891	58.5143	0.134573	2.25094	0.024389	0.439763	-0.302993
ENSMUSG00000026837	Col5a1	protein_coding	206.601	251.545	158.064	256.343	306.303	254.478	238.889	0.124566	2.2511	0.0243789	0.439763	-0.28046
ENSMUSG00000029915	Clec5a	protein_coding	41.9191	32.2996	19.6352	58.7452	61.4621	38.1156	42.0295	0.13138	2.2523	0.0243034	0.439763	-0.29577
ENSMUSG00000034640	Tiparp	protein_coding	2156.84	2206.16	1819.2	2534.94	2038.33	3245.43	2333.48	0.114583	2.25141	0.0243597	0.439763	-0.257956
ENSMUSG00000042462	Dctpp1	protein_coding	91.8228	86.1323	84.4315	64.9757	49.3712	66.1418	73.8126	0.133623	-2.25242	0.0242954	0.439763	0.301221
ENSMUSG00000053279	Aldh1a1	protein_coding	285.449	235.885	244.459	180.686	234.765	169.278	225.087	0.122244	-2.25112	0.0243782	0.439763	0.275269
ENSMUSG00000021508	Cxcl14	protein_coding	130.748	170.307	157.082	196.707	188.417	217.483	176.791	0.123024	2.24727	0.0246225	0.442174	-0.276546
ENSMUSG00000031377	Bmx	protein_coding	25.9499	36.2147	39.2705	20.4718	19.1439	15.6947	26.1243	0.126757	-2.24737	0.0246165	0.442174	0.284782
ENSMUSG00000059851	Kmt5c	protein_coding	30.9403	31.3208	23.5623	15.1313	14.1061	15.6947	21.7926	0.123608	-2.24775	0.0245919	0.442174	0.277316
ENSMUSG00000022748	Cmss1	protein_coding	355.314	324.953	350.489	255.453	253.909	311.651	308.628	0.113316	-2.24561	0.0247293	0.443494	0.254477
ENSMUSG00000020115	Tbk1	protein_coding	390.247	382.701	354.416	429.908	467.515	486.535	418.554	0.106064	2.24378	0.0248464	0.444995	-0.237997
ENSMUSG00000033192	Lpcat2	protein_coding	12.975	10.7665	22.5805	26.7024	36.2727	26.9051	22.7004	0.122251	2.24109	0.0250203	0.447507	-0.273099
ENSMUSG00000046997	Spsb4	protein_coding	44.9133	47.96	49.0881	18.6916	35.2652	31.3893	37.8846	0.13185	-2.24036	0.0250674	0.447748	0.294927
ENSMUSG00000018927	Ccl6	protein_coding	204.605	220.225	223.842	428.128	264.992	206.273	258.011	0.130896	2.23749	0.0252545	0.450484	-0.292986
ENSMUSG00000097431	Gm26782	lincRNA	92.8209	91.0261	94.2491	117.49	135.015	126.678	109.547	0.128698	2.2362	0.0253384	0.451376	-0.287945
ENSMUSG00000038037	Socs1	protein_coding	17.9653	42.0874	53.9969	40.0535	75.5682	84.0786	52.2916	0.129424	2.23332	0.0255278	0.454142	-0.287814
ENSMUSG00000042712	Tceal9	protein_coding	142.725	183.031	199.298	144.193	125.947	119.952	152.524	0.126951	-2.23228	0.0255967	0.454759	0.283587
ENSMUSG00000014599	Csf1	protein_coding	1734.65	2436.17	1608.13	1992.89	4152.22	3753.27	2612.89	0.130262	2.23123	0.0256661	0.45478	-0.288939
ENSMUSG00000031204	Asb12	protein_coding	67.8691	106.687	84.4315	53.4047	66.5	54.9313	72.3039	0.13434	-2.23149	0.0256484	0.45478	0.299925
ENSMUSG00000027993	Trim2	protein_coding	145.719	159.54	148.246	200.268	245.848	159.189	176.468	0.126282	2.22844	0.0258511	0.457448	-0.281545
ENSMUSG00000025491	Ifitm1	protein_coding	66.871	51.8751	59.8875	82.7773	92.697	82.9575	72.8442	0.133605	2.22763	0.0259053	0.457798	-0.297832
ENSMUSG00000042429	Adora1	protein_coding	160.69	170.307	133.52	111.26	124.939	109.863	135.096	0.126918	-2.22559	0.0260415	0.459595	0.282619
ENSMUSG00000020280	Pus10	protein_coding	96.8132	72.4294	76.5774	113.93	140.053	94.168	98.9952	0.132607	2.2232	0.0262024	0.459689	-0.294987
ENSMUSG00000022528	Hes1	protein_coding	142.725	88.0898	119.775	145.973	165.242	169.278	138.514	0.129537	2.22243	0.0262541	0.459689	-0.287919
ENSMUSG00000024427	Spry4	protein_coding	471.091	539.305	687.233	681.8	660.97	797.065	639.577	0.11433	2.22459	0.0261088	0.459689	-0.254335
ENSMUSG00000026064	Ptp4a1	protein_coding	835.388	800.638	822.716	735.205	542.076	719.713	742.623	0.107825	-2.22245	0.0262532	0.459689	0.239653
ENSMUSG00000033752	Mnd1	protein_coding	8.98267	7.8302	8.83586	22.252	23.1742	12.3315	13.9011	0.110281	2.22261	0.0262424	0.459689	-0.243668
ENSMUSG00000040811	Eml2	protein_coding	182.648	173.243	170.827	145.083	120.909	134.526	154.539	0.123516	-2.22346	0.0261846	0.459689	0.274797
ENSMUSG00000096449	Gm4076	processed_pseudogene	66.871	32.2996	44.1793	48.9543	69.5227	122.194	64.0035	0.131672	2.2206	0.0263779	0.461249	-0.291246
ENSMUSG00000040204	Pclaf	protein_coding	0.998074	22.5118	16.6899	1.78016	6.04545	3.36314	8.56477	0.0819083	-2.21703	0.026621	0.464447	0.172725
ENSMUSG00000052776	Oas1a	protein_coding	62.8787	136.05	102.103	97.0186	158.189	206.273	127.085	0.134541	2.21638	0.0266655	0.464447	-0.297691
ENSMUSG00000090799	Klhl33	protein_coding	62.8787	56.769	53.0151	32.0428	35.2652	43.7209	47.2819	0.13424	-2.21681	0.0266358	0.464447	0.297542
ENSMUSG00000020926	Adam11	protein_coding	96.8132	97.8776	82.468	137.962	118.894	121.073	109.181	0.129388	2.21173	0.0269851	0.465715	-0.286391
ENSMUSG00000021067	Sav1	protein_coding	188.636	235.885	255.258	261.683	331.492	284.746	259.617	0.120273	2.21459	0.0267883	0.465715	-0.266394
ENSMUSG00000024767	Otub1	protein_coding	368.289	387.595	382.887	336.45	286.152	297.078	343.075	0.10958	-2.21075	0.0270532	0.465715	0.242324
ENSMUSG00000026896	Ifih1	protein_coding	320.382	661.652	580.221	580.331	1377.36	1321.72	806.943	0.114432	2.21309	0.0268912	0.465715	-0.24822
ENSMUSG00000029553	Tfec	protein_coding	21.9576	43.0661	12.7629	56.0749	42.3182	41.4788	36.2764	0.126872	2.21341	0.0268697	0.465715	-0.280082
ENSMUSG00000038725	Pkhd1l1	protein_coding	38.9249	61.6629	40.2522	55.1849	91.6894	72.8681	60.0971	0.134289	2.21123	0.0270196	0.465715	-0.296792
ENSMUSG00000040997	Abhd4	protein_coding	354.316	425.767	403.504	323.098	297.235	334.072	356.332	0.11042	-2.21283	0.0269092	0.465715	0.244382
ENSMUSG00000049001	Ndnf	protein_coding	48.9056	41.1086	43.1975	56.0749	74.5606	71.747	55.9324	0.134573	2.21209	0.0269601	0.465715	-0.297735
ENSMUSG00000076435	Acsf2	protein_coding	339.345	295.59	230.714	388.964	338.545	378.914	328.679	0.118317	2.2114	0.0270084	0.465715	-0.261682
ENSMUSG00000039982	Dtx4	protein_coding	32.9365	40.1298	22.5805	62.3055	52.3939	41.4788	41.9708	0.132503	2.20754	0.0272765	0.468827	-0.292666
ENSMUSG00000057751	Megf6	protein_coding	8.98267	30.342	19.6352	10.6809	7.05303	6.72629	13.9034	0.105771	-2.20714	0.0273045	0.468827	0.230936
ENSMUSG00000024112	Cacna1h	protein_coding	29.9422	45.0237	62.8327	54.2948	109.826	61.6576	60.5961	0.132532	2.20559	0.0274127	0.470079	-0.291816
ENSMUSG00000020423	Btg2	protein_coding	3551.15	3225.07	3074.88	2683.59	1810.61	3208.44	2925.62	0.118603	-2.20458	0.0274838	0.470082	0.261446
ENSMUSG00000044501	Zfp758	protein_coding	122.763	133.113	128.611	169.115	178.341	156.947	148.148	0.123817	2.20415	0.0275139	0.470082	-0.273057
ENSMUSG00000100691	2010320M18Rik	lincRNA	45.9114	40.1298	63.8145	32.0428	27.2045	32.5104	40.2689	0.132661	-2.20408	0.0275189	0.470082	0.292407
ENSMUSG00000020525	Ppm1d	protein_coding	128.752	103.75	110.939	97.9086	76.5758	69.5049	97.905	0.131956	-2.20067	0.0277591	0.472367	0.290734
ENSMUSG00000023307	2024-03-05	protein_coding	792.471	910.261	992.561	870.497	1242.34	1282.48	1015.1	0.114769	2.20105	0.0277327	0.472367	-0.25259
ENSMUSG00000024063	Lbh	protein_coding	2637.91	2439.11	2247.25	2722.75	2876.63	3017.86	2656.92	0.0920991	2.19967	0.0278301	0.472367	-0.202587
ENSMUSG00000056427	Slit3	protein_coding	72.8594	115.496	115.848	136.182	152.144	133.405	120.989	0.131063	2.20054	0.0277687	0.472367	-0.288534
ENSMUSG00000079481	Nhsl2	protein_coding	194.625	234.906	142.355	224.3	288.167	251.115	222.578	0.126579	2.20014	0.0277971	0.472367	-0.278505
ENSMUSG00000025289	Prdx4	protein_coding	109.788	123.326	128.611	76.5467	102.773	82.9575	104	0.130746	-2.19786	0.0279591	0.473818	0.287502
ENSMUSG00000037098	Rab11fip3	protein_coding	360.305	347.465	325.945	395.195	435.273	437.209	383.565	0.107129	2.19747	0.0279868	0.473818	-0.23543
ENSMUSG00000059323	Tonsl	protein_coding	314.393	273.078	273.912	206.498	260.962	208.515	256.226	0.117926	-2.19616	0.0280804	0.474798	0.259041
ENSMUSG00000004980	Hnrnpa2b1	protein_coding	5497.39	5018.18	5269.12	4549.19	4311.42	4743.15	4898.08	0.0864189	-2.19321	0.028292	0.475355	0.189536
ENSMUSG00000038175	Mylip	protein_coding	368.289	446.322	409.395	366.712	322.424	288.109	366.875	0.113153	-2.1949	0.0281708	0.475355	0.248444
ENSMUSG00000040328	Olfr56	protein_coding	46.9095	91.0261	98.1762	73.8765	277.083	276.899	143.995	0.096074	2.19397	0.0282377	0.475355	-0.201293
ENSMUSG00000050440	Hamp	protein_coding	1.99615	6.85143	9.81762	9.79086	21.1591	17.9368	11.2587	0.0997113	2.19346	0.0282742	0.475355	-0.214994
ENSMUSG00000058818	Pirb	protein_coding	137.734	104.729	79.5227	156.654	157.182	132.284	128.018	0.131275	2.1946	0.0281921	0.475355	-0.288213
ENSMUSG00000001750	Tcirg1	protein_coding	76.8517	126.262	104.067	116.6	168.265	146.857	123.151	0.132146	2.19234	0.0283547	0.475808	-0.28971
ENSMUSG00000008845	Cd163	protein_coding	389.249	319.081	240.532	500.224	419.152	334.072	367.052	0.125489	2.19059	0.0284816	0.476617	-0.274948
ENSMUSG00000050912	Tmem123	protein_coding	786.483	844.683	806.026	923.011	992.462	967.464	886.688	0.0945421	2.19019	0.0285104	0.476617	-0.207072
ENSMUSG00000074863	Platr25	protein_coding	16.9673	12.7241	16.6899	6.23055	7.05303	5.60524	10.8784	0.104052	-2.19065	0.028477	0.476617	0.225895
ENSMUSG00000021557	Agtpbp1	protein_coding	2027.09	1755.92	1954.69	1522.92	1668.55	1675.97	1767.52	0.093359	-2.18943	0.0285659	0.476946	0.204403
ENSMUSG00000042109	Csdc2	protein_coding	308.405	294.611	277.839	378.283	353.659	353.13	327.655	0.109192	2.18853	0.0286311	0.477437	-0.239019
ENSMUSG00000013076	Amotl1	protein_coding	1298.49	1237.17	1076.01	1463.29	1373.33	1451.76	1316.67	0.0962887	2.18604	0.0288128	0.478097	-0.210496
ENSMUSG00000020143	Dock2	protein_coding	30.9403	46.9812	30.4346	63.1956	53.4015	53.8103	46.4606	0.133848	2.1823	0.0290872	0.478097	-0.292304
ENSMUSG00000022884	Eif4a2	protein_coding	3745.77	3566.66	4127.33	3381.41	3206.11	3216.29	3540.59	0.0891961	-2.18144	0.0291507	0.478097	0.194579
ENSMUSG00000023963	Cyp39a1	protein_coding	69.8652	100.814	113.884	60.5253	66.5	69.5049	80.1823	0.133992	-2.18432	0.0289387	0.478097	0.292757
ENSMUSG00000024621	Csf1r	protein_coding	193.626	259.376	226.787	352.471	285.144	245.509	260.486	0.122825	2.18065	0.0292097	0.478097	-0.267957
ENSMUSG00000026255	Efhd1	protein_coding	17.9653	15.6604	9.81762	22.252	31.2348	30.2683	21.1997	0.121631	2.18391	0.0289691	0.478097	-0.264653
ENSMUSG00000026308	Klhl30	protein_coding	232.551	221.203	157.082	251.002	299.25	247.752	234.807	0.123524	2.18068	0.0292071	0.478097	-0.269412
ENSMUSG00000027361	Gabpb1	protein_coding	212.59	275.036	232.678	292.836	296.227	321.741	271.851	0.116075	2.18689	0.0287504	0.478097	-0.253881
ENSMUSG00000029651	Mtus2	protein_coding	1233.62	905.367	941.509	1198.05	1274.58	1289.2	1140.39	0.106459	2.18103	0.0291815	0.478097	-0.23219
ENSMUSG00000031983	2310022B05Rik	protein_coding	424.182	456.109	438.847	543.838	505.803	542.587	485.228	0.102382	2.1855	0.0288522	0.478097	-0.223779
ENSMUSG00000046079	Lrrc8d	protein_coding	98.8094	69.4931	65.778	132.622	103.78	96.4101	94.4821	0.133315	2.18092	0.029189	0.478097	-0.290968
ENSMUSG00000053470	Kdm3a	protein_coding	333.357	340.614	430.993	325.769	266	280.262	329.499	0.116608	-2.18442	0.0289315	0.478097	0.254798
ENSMUSG00000055652	Klhl25	protein_coding	28.9442	60.6841	48.1063	42.7238	94.7121	89.6838	60.809	0.132135	2.1816	0.0291392	0.478097	-0.287473
ENSMUSG00000059498	Fcgr3	protein_coding	220.574	239.8	209.115	315.978	259.955	270.172	252.599	0.116542	2.18487	0.0288986	0.478097	-0.254719
ENSMUSG00000075053	Vdac3-ps1	unprocessed_pseudogene	34.9326	21.5331	25.5258	128.171	18.1364	133.405	60.284	0.0810218	2.18721	0.0287271	0.478097	-0.16339
ENSMUSG00000078670	Fam174b	protein_coding	2359.45	1973.21	1969.41	1729.42	1733.03	1855.33	1936.64	0.0957446	-2.18012	0.0292488	0.478149	0.208735
ENSMUSG00000020692	Nle1	protein_coding	95.8151	88.0898	80.5045	62.3055	51.3864	70.626	74.7879	0.133646	-2.17937	0.0293044	0.47847	0.291402
ENSMUSG00000004951	Hspb1	protein_coding	3133.95	2734.7	2665.48	2222.53	1639.33	2850.82	2541.14	0.117994	-2.17558	0.0295866	0.479927	0.256682
ENSMUSG00000024457	Trim26	protein_coding	155.7	204.564	254.276	193.147	340.561	317.256	244.251	0.13117	2.17491	0.0296368	0.479927	-0.285161
ENSMUSG00000042010	Acacb	protein_coding	3739.78	3127.19	2804.89	4113.94	3652.46	3842.95	3546.87	0.100757	2.17485	0.0296415	0.479927	-0.219131
ENSMUSG00000044734	Serpinb1a	protein_coding	24.9519	27.4057	18.6535	42.7238	29.2197	50.4471	32.2336	0.129407	2.17487	0.0296397	0.479927	-0.281078
ENSMUSG00000060961	Slc4a4	protein_coding	404.22	374.871	298.456	502.004	415.121	433.845	404.753	0.114687	2.17479	0.029646	0.479927	-0.249465
ENSMUSG00000063179	Pstk	protein_coding	186.64	174.222	187.516	146.863	123.932	150.22	161.566	0.123061	-2.17558	0.0295867	0.479927	0.267841
ENSMUSG00000066363	Serpina3f	protein_coding	252.513	310.272	243.477	269.694	463.485	337.435	312.813	0.126183	2.1765	0.029518	0.479927	-0.274612
ENSMUSG00000000058	Cav2	protein_coding	443.145	464.918	426.085	427.238	353.659	241.025	392.678	0.123056	-2.17227	0.0298356	0.481998	0.267421
ENSMUSG00000001366	Fbxo9	protein_coding	232.551	226.097	237.586	165.555	206.553	172.641	206.831	0.11932	-2.17212	0.0298464	0.481998	0.259249
ENSMUSG00000015950	Ncf1	protein_coding	59.8845	73.4082	42.2158	85.4475	88.6667	82.9575	72.0967	0.13432	2.1705	0.0299687	0.482801	-0.291686
ENSMUSG00000024048	Myl12a	protein_coding	5580.23	5504.63	5518.48	4463.74	4759.79	5106.37	5155.54	0.0865044	-2.17085	0.0299425	0.482801	0.187788
ENSMUSG00000026921	Egfl7	protein_coding	98.8094	105.708	84.4315	93.4582	56.4242	38.1156	79.4911	0.134486	-2.16896	0.0300855	0.483994	0.292077
ENSMUSG00000030830	Itgal	protein_coding	17.9653	25.4482	16.6899	30.2627	42.3182	33.6314	27.7193	0.127633	2.16857	0.0301155	0.483994	-0.276444
ENSMUSG00000062209	Erbb4	protein_coding	179.653	184.01	170.827	152.203	130.985	125.557	157.206	0.123492	-2.16789	0.0301671	0.484239	0.267905
ENSMUSG00000085687	Gm16153	processed_transcript	2.99422	5.87265	2.94529	13.3512	11.0833	10.0894	7.72268	0.0922581	2.16738	0.0302059	0.484277	-0.196873
ENSMUSG00000056091	St3gal5	protein_coding	535.966	412.065	371.106	522.476	553.159	573.976	494.791	0.113942	2.16566	0.0303371	0.485795	-0.246764
ENSMUSG00000024529	Lox	protein_coding	158.694	251.545	221.878	309.747	255.924	262.325	243.352	0.12446	2.16444	0.0304303	0.486118	-0.269474
ENSMUSG00000036112	Metap2	protein_coding	1378.34	1316.45	1489.33	1229.2	1127.48	1197.28	1289.68	0.093472	-2.1645	0.0304262	0.486118	0.202328
ENSMUSG00000027330	Cdc25b	protein_coding	9.98074	31.3208	14.7264	8.90078	2.01515	11.2105	13.0257	0.100014	-2.16325	0.0305218	0.486995	0.212066
ENSMUSG00000025731	Mettl26	protein_coding	69.8652	69.4931	55.9604	40.0535	46.3485	43.7209	54.2403	0.134572	-2.16213	0.0306078	0.487782	0.29112
ENSMUSG00000021109	Hif1a	protein_coding	1448.21	1348.75	1501.11	1628.84	1594.99	1851.97	1562.31	0.0947595	2.16073	0.0307159	0.488182	-0.204749
ENSMUSG00000032580	Rbm5	protein_coding	739.573	667.525	750.066	645.307	584.394	566.129	658.832	0.101131	-2.16038	0.0307429	0.488182	0.218512
ENSMUSG00000040113	Mettl11b	protein_coding	17.9653	8.80898	5.89057	24.0321	19.1439	25.7841	16.9375	0.113631	2.16112	0.0306862	0.488182	-0.24379
ENSMUSG00000040446	Rprd1a	protein_coding	372.282	297.548	324.963	401.425	426.205	399.093	370.253	0.11024	2.15921	0.030834	0.489044	-0.23806
ENSMUSG00000021983	Atp8a2	protein_coding	89.8267	85.1535	67.7416	92.5682	147.106	105.378	97.9624	0.133272	2.15848	0.0308905	0.489357	-0.287688
ENSMUSG00000043085	Tmem82	protein_coding	90.8248	82.2171	70.6868	129.061	131.992	82.9575	97.9567	0.133149	2.15699	0.0310064	0.490608	-0.287443
ENSMUSG00000023277	Twf2	protein_coding	1590.93	1516.12	1622.85	1421.46	1146.62	1402.43	1450.07	0.0984708	-2.15507	0.0311565	0.490893	0.212218
ENSMUSG00000026466	Tor1aip1	protein_coding	1057.96	1248.92	1286.11	1266.58	1560.73	1504.45	1320.79	0.102834	2.15252	0.0313563	0.490893	-0.22135
ENSMUSG00000026626	Ppp2r5a	protein_coding	830.398	913.198	918.929	1020.92	1027.73	1095.26	967.739	0.0949556	2.1526	0.0313501	0.490893	-0.204406
ENSMUSG00000026944	Abca2	protein_coding	534.968	583.35	466.337	652.428	650.894	615.455	583.905	0.104499	2.1558	0.031099	0.490893	-0.225301
ENSMUSG00000029925	Tbxas1	protein_coding	21.9576	31.3208	11.7811	32.9329	40.303	42.5998	30.1492	0.126864	2.15462	0.0311918	0.490893	-0.272616
ENSMUSG00000038683	Pak1ip1	protein_coding	319.384	258.397	307.291	232.31	229.727	243.267	265.063	0.115274	-2.15587	0.0310939	0.490893	0.248563
ENSMUSG00000039236	Isg20	protein_coding	42.9172	86.1323	77.5592	64.9757	206.553	245.509	120.608	0.0991606	2.15305	0.0313151	0.490893	-0.205422
ENSMUSG00000042228	Lyn	protein_coding	203.607	226.097	194.389	244.772	255.924	289.23	235.67	0.117093	2.15259	0.0313511	0.490893	-0.25208
ENSMUSG00000045639	Zfp629	protein_coding	133.742	112.559	118.793	192.257	156.174	137.889	141.902	0.127671	2.1538	0.0312559	0.490893	-0.275179
ENSMUSG00000026786	Apbb1ip	protein_coding	45.9114	46.9812	36.3252	70.3162	78.5909	48.205	54.3883	0.134366	2.15002	0.0315532	0.493395	-0.289138
ENSMUSG00000027533	Fabp5	protein_coding	125.757	127.241	150.21	113.93	91.6894	91.9259	116.792	0.129202	-2.14833	0.0316878	0.493728	0.277821
ENSMUSG00000035151	Elmod2	protein_coding	161.688	184.989	194.389	218.069	250.886	221.967	205.331	0.11953	2.14907	0.0316287	0.493728	-0.256948
ENSMUSG00000039461	Tcta	protein_coding	251.515	329.847	269.003	217.179	252.902	191.699	252.024	0.120834	-2.14788	0.0317229	0.493728	0.259625
ENSMUSG00000051790	Nlgn2	protein_coding	85.8344	130.177	114.866	130.842	166.25	153.584	130.259	0.129913	2.1485	0.0316742	0.493728	-0.279174
ENSMUSG00000000171	Sdhd	protein_coding	3510.23	3507.93	3610.92	3046.74	3019.7	3172.56	3311.35	0.0840753	-2.14269	0.0321381	0.493806	0.180148
ENSMUSG00000001508	Sgca	protein_coding	805.446	802.596	855.114	646.197	675.076	748.86	755.548	0.098739	-2.14276	0.032132	0.493806	0.211576
ENSMUSG00000004359	Spic	protein_coding	5.98845	2.93633	5.89057	19.5817	9.06818	11.2105	9.11262	0.0957902	2.14298	0.0321147	0.493806	-0.202359
ENSMUSG00000005417	Mprip	protein_coding	1329.44	1425.1	1276.29	1587.01	1598.02	1524.62	1456.75	0.0910083	2.14389	0.0320414	0.493806	-0.195118
ENSMUSG00000010376	Nedd8	protein_coding	446.139	368.02	372.088	320.428	294.212	343.041	357.321	0.11197	-2.14717	0.0317794	0.493806	0.240443
ENSMUSG00000020057	Dram1	protein_coding	102.802	131.156	107.994	156.654	169.273	131.163	133.173	0.128046	2.14525	0.0319329	0.493806	-0.274863
ENSMUSG00000027293	Ehd4	protein_coding	5032.29	4951.63	4884.26	3880.74	3946.67	4795.84	4581.91	0.0944333	-2.144	0.0320328	0.493806	0.202463
ENSMUSG00000032425	Zfp949	protein_coding	44.9133	92.0049	120.757	56.0749	56.4242	51.5682	70.2904	0.133681	-2.14655	0.0318288	0.493806	0.286736
ENSMUSG00000033220	Rac2	protein_coding	36.9288	57.7478	49.0881	78.3269	61.4621	75.1102	59.7773	0.134574	2.14458	0.0319865	0.493806	-0.28879
ENSMUSG00000041261	Car8	protein_coding	145.719	220.225	184.571	143.303	130.985	140.131	160.822	0.126987	-2.14515	0.031941	0.493806	0.27252
ENSMUSG00000043008	Klhl6	protein_coding	117.773	100.814	94.2491	90.788	49.3712	76.2312	88.2044	0.134	-2.14616	0.0318606	0.493806	0.287782
ENSMUSG00000045095	Magi1	protein_coding	154.702	162.477	134.501	211.839	203.53	170.399	172.908	0.123354	2.142	0.0321938	0.493806	-0.264365
ENSMUSG00000089911	Mfsd14a	protein_coding	154.702	160.519	155.118	131.732	108.818	116.589	137.913	0.125431	-2.14179	0.0322104	0.493806	0.268836
ENSMUSG00000000782	Tcf7	protein_coding	4.99037	8.80898	1.96352	16.0214	7.05303	20.1789	9.83603	0.0948359	2.13868	0.0324615	0.496303	-0.198745
ENSMUSG00000004730	Adgre1	protein_coding	56.8902	115.496	70.6868	136.182	114.864	102.015	99.3556	0.134295	2.13902	0.032434	0.496303	-0.287376
ENSMUSG00000019851	Perp	protein_coding	1487.13	1504.38	1540.38	1175.79	1273.58	1402.43	1397.28	0.0943739	-2.13666	0.0326258	0.496303	0.201643
ENSMUSG00000020389	Cdkl3	protein_coding	67.8691	75.3657	70.6868	43.6138	45.3409	57.1734	60.0083	0.13448	-2.13626	0.0326582	0.496303	0.287334
ENSMUSG00000026180	Cxcr2	protein_coding	41.9191	32.2996	22.5805	62.3055	37.2803	58.2945	42.4466	0.13189	2.13759	0.0325499	0.496303	-0.281748
ENSMUSG00000028329	Xpa	protein_coding	45.9114	61.6629	57.9239	34.7131	40.303	31.3893	45.3173	0.13397	-2.1361	0.0326716	0.496303	0.286397
ENSMUSG00000029380	Cxcl1	protein_coding	1363.37	2222.8	1889.89	1610.15	5108.41	6057.02	3041.94	0.10372	2.1374	0.0325653	0.496303	-0.214624
ENSMUSG00000040006	Ginm1	protein_coding	876.309	823.15	815.844	755.677	658.955	700.655	771.765	0.0981468	-2.13786	0.0325277	0.496303	0.209844
ENSMUSG00000015533	Itga2	protein_coding	15.9692	23.4906	37.3069	9.79086	14.1061	14.5736	19.2062	0.11689	-2.13408	0.0328363	0.497413	0.247763
ENSMUSG00000028794	A3galt2	protein_coding	1.99615	7.8302	13.7447	11.571	19.1439	26.9051	13.5319	0.102432	2.13289	0.032934	0.497413	-0.214753
ENSMUSG00000034610	Zcchc11	protein_coding	304.413	344.529	363.252	380.063	443.333	422.635	376.371	0.110176	2.13331	0.0328995	0.497413	-0.235057
ENSMUSG00000038521	C1s1	protein_coding	163.684	190.861	188.498	277.704	255.924	178.247	209.153	0.125579	2.13353	0.0328811	0.497413	-0.268078
ENSMUSG00000071648	Rom1	protein_coding	89.8267	163.456	114.866	95.2384	66.5	94.168	104.009	0.134007	-2.13351	0.0328833	0.497413	0.285949
ENSMUSG00000097418	Mir155hg	lincRNA	14.9711	26.4269	23.5623	11.571	57.4318	61.6576	32.6035	0.116908	2.13246	0.032969	0.497413	-0.246307
ENSMUSG00000036591	Arhgap21	protein_coding	941.184	1029.67	1060.3	824.213	817.144	917.017	931.589	0.0973116	-2.13192	0.0330137	0.497489	0.207464
ENSMUSG00000055148	Klf2	protein_coding	323.376	257.418	237.586	246.552	151.136	218.604	239.112	0.127041	-2.1314	0.033056	0.497489	0.270841
ENSMUSG00000069833	Ahnak	protein_coding	11804.2	11620	10904.4	10667.6	9011.76	9836.07	10640.7	0.0893473	-2.13104	0.0330862	0.497489	0.190403
ENSMUSG00000086584	Gm12002	antisense_RNA	77.8498	55.7902	63.8145	56.965	39.2955	30.2683	53.9972	0.134043	-2.12935	0.0332251	0.499015	0.28584
ENSMUSG00000028044	Cks1b	protein_coding	30.9403	36.2147	36.3252	23.142	16.1212	20.1789	27.1537	0.128052	-2.12865	0.033283	0.499321	0.272579
ENSMUSG00000020044	Timp3	protein_coding	3330.57	3710.54	3933.92	3068.1	3240.36	3108.66	3398.69	0.0904888	-2.12422	0.0336514	0.501682	0.19222
ENSMUSG00000020101	Vsir	protein_coding	112.782	150.731	96.2126	104.139	74.5606	75.1102	102.256	0.133261	-2.12404	0.0336666	0.501682	0.283309
ENSMUSG00000023034	Nr4a1	protein_coding	437.157	496.239	667.598	359.592	325.447	530.255	469.381	0.12637	-2.12599	0.0335043	0.501682	0.268588
ENSMUSG00000030630	Fah	protein_coding	162.686	107.665	102.103	185.136	156.174	162.552	146.053	0.1299	2.12492	0.033593	0.501682	-0.276119
ENSMUSG00000042594	Sh2b3	protein_coding	405.218	434.576	436.884	388.964	315.371	335.193	386.035	0.109578	-2.12506	0.0335816	0.501682	0.232919
ENSMUSG00000109953	5430430B14Rik	TEC	29.9422	25.4482	18.6535	8.01071	16.1212	13.4526	18.6047	0.117672	-2.12501	0.0335858	0.501682	0.248507
ENSMUSG00000024735	Prpf19	protein_coding	1803.52	1769.63	1787.79	1523.81	1558.72	1553.77	1666.21	0.0870738	-2.1212	0.0339049	0.504667	0.184705
ENSMUSG00000048578	Mlec	protein_coding	1290.51	1015.97	1090.74	1463.29	1278.61	1327.32	1244.41	0.10177	2.12027	0.0339833	0.505269	-0.215787
ENSMUSG00000037926	Ssh2	protein_coding	1627.86	1586.6	1639.54	1436.59	1345.11	1400.19	1505.98	0.0888349	-2.11771	0.0341996	0.507351	0.188133
ENSMUSG00000049988	Lrrc25	protein_coding	31.9384	27.4057	22.5805	45.394	39.2955	48.205	35.8032	0.132063	2.11789	0.0341841	0.507351	-0.27969
ENSMUSG00000007097	Atp1a2	protein_coding	7996.57	7831.18	8072.04	6711.19	6810.2	7313.71	7455.82	0.0834962	-2.1165	0.0343026	0.508312	0.17672
ENSMUSG00000075122	Cd80	protein_coding	7.9846	10.7665	17.6717	22.252	23.1742	26.9051	18.1257	0.117462	2.11081	0.0347883	0.514936	-0.246855
ENSMUSG00000029108	Pcdh7	protein_coding	1687.74	1520.04	1554.13	1289.72	1282.64	1476.42	1468.45	0.0950034	-2.10943	0.0349076	0.516128	0.200402
ENSMUSG00000021913	Ogdhl	protein_coding	1416.27	1220.53	1095.65	1604.81	1357.2	1520.14	1369.1	0.103002	2.10891	0.0349521	0.516213	-0.217228
ENSMUSG00000022831	Hcls1	protein_coding	135.738	131.156	125.665	139.742	201.515	178.247	152.011	0.126853	2.10838	0.0349979	0.516315	-0.26747
ENSMUSG00000032245	Cln6	protein_coding	125.757	135.071	134.501	102.359	91.6894	103.136	115.419	0.1279	-2.10792	0.0350378	0.516332	0.269767
ENSMUSG00000010755	Cars	protein_coding	272.474	255.46	271.948	220.739	192.447	226.452	239.92	0.115687	-2.10692	0.0351247	0.51704	0.243804
ENSMUSG00000031538	Plat	protein_coding	273.472	275.036	361.288	395.195	356.682	383.398	340.845	0.115165	2.10488	0.0353019	0.519074	-0.242446
ENSMUSG00000064179	Tnnt1	protein_coding	94.8171	126.262	132.538	74.7666	98.7424	82.9575	101.681	0.131997	-2.10358	0.0354151	0.520164	0.277759
ENSMUSG00000033987	Dnah17	protein_coding	28.9442	11.7453	19.6352	41.8337	30.2273	34.7525	27.8564	0.125786	2.10293	0.0354722	0.520255	-0.26402
ENSMUSG00000039262	Prrc2b	protein_coding	1365.37	1550.38	1313.6	1600.36	1707.84	1656.91	1532.41	0.0942357	2.10261	0.0354995	0.520255	-0.198144
ENSMUSG00000035004	Igsf6	protein_coding	99.8074	83.1959	53.0151	95.2384	113.856	128.92	95.6722	0.133964	2.10176	0.0355747	0.520784	-0.281454
ENSMUSG00000019841	Rev3l	protein_coding	237.542	234.906	291.583	179.796	222.674	198.425	227.488	0.120133	-2.09961	0.0357628	0.522312	0.252274
ENSMUSG00000025492	Ifitm3	protein_coding	901.261	1315.47	1239.97	1190.03	1575.85	1551.53	1295.69	0.115412	2.09976	0.0357496	0.522312	-0.242324
ENSMUSG00000043122	A530016L24Rik	protein_coding	254.509	176.18	163.954	252.782	266	253.357	227.797	0.124278	2.09923	0.0357968	0.522312	-0.26092
ENSMUSG00000021277	Traf3	protein_coding	220.574	233.927	188.498	283.935	256.932	265.688	241.593	0.116837	2.09813	0.0358934	0.523148	-0.245207
ENSMUSG00000023828	Slc22a3	protein_coding	53.896	54.8114	62.8327	85.4475	89.6742	69.5049	69.3612	0.133983	2.09612	0.0360716	0.524595	-0.281123
ENSMUSG00000097141	Gm10524	TEC	55.8922	56.769	39.2705	67.646	93.7045	63.8997	62.8636	0.134572	2.09636	0.0360502	0.524595	-0.282198
ENSMUSG00000037736	Limch1	protein_coding	2881.44	2945.14	3314.43	2535.83	2599.55	2727.51	2833.98	0.0904319	-2.09316	0.0363346	0.527843	0.189289
ENSMUSG00000040363	Bcor	protein_coding	424.182	470.791	477.136	529.597	518.902	610.971	505.263	0.105631	2.09269	0.0363765	0.527876	-0.221059
ENSMUSG00000004508	Gab2	protein_coding	361.303	392.489	374.051	459.28	474.568	427.119	414.802	0.105423	2.08912	0.0366968	0.530787	-0.220275
ENSMUSG00000032279	Idh3a	protein_coding	6358.73	5861.89	6290.15	5024.49	5156.77	5791.33	5747.23	0.089147	-2.08916	0.0366931	0.530787	0.186241
ENSMUSG00000044827	Tlr1	protein_coding	26.948	24.4694	15.7082	32.9329	54.4091	29.1472	30.6025	0.127165	2.0898	0.0366354	0.530787	-0.265264
ENSMUSG00000022425	Enpp2	protein_coding	84.8363	108.644	134.501	128.171	166.25	151.341	128.957	0.13063	2.08755	0.0368387	0.532261	-0.272731
ENSMUSG00000002409	Dyrk1b	protein_coding	148.713	149.753	134.501	107.699	126.955	89.6838	126.217	0.128497	-2.08683	0.0369031	0.532613	0.268337
ENSMUSG00000030677	Kif22	protein_coding	3.9923	21.5331	10.7994	2.67024	5.03788	4.48419	8.08617	0.0877713	-2.08535	0.0370371	0.533773	0.177875
ENSMUSG00000108614	2610306O10Rik	TEC	35.9307	17.618	19.6352	14.2413	10.0758	12.3315	18.3054	0.116364	-2.08506	0.0370637	0.533773	0.241481
ENSMUSG00000100131	Gm28439	unprocessed_pseudogene	319.384	286.781	311.218	315.978	344.591	534.74	352.115	0.124787	2.08418	0.0371441	0.534353	-0.260003
ENSMUSG00000044566	Cage1	protein_coding	3.9923	4.89388	3.92705	12.4611	11.0833	11.2105	7.92802	0.0940986	2.0837	0.0371871	0.534394	-0.193575
ENSMUSG00000043541	Casc1	protein_coding	50.9018	41.1086	35.3434	50.7345	72.5455	69.5049	53.3564	0.134378	2.0827	0.0372789	0.535136	-0.279766
ENSMUSG00000020393	Kremen1	protein_coding	1297.5	1227.38	1038.7	1354.7	1366.27	1515.66	1300.04	0.0999786	2.08047	0.0374827	0.535709	-0.208001
ENSMUSG00000027326	Knl1	protein_coding	1.99615	23.4906	14.7264	5.34047	6.04545	1.12105	8.78669	0.0843388	-2.08057	0.037473	0.535709	0.169632
ENSMUSG00000030094	Xpc	protein_coding	108.79	114.517	126.647	88.1178	89.6742	81.8365	101.597	0.129916	-2.08043	0.0374864	0.535709	0.270489
ENSMUSG00000035357	Pdzrn3	protein_coding	442.147	396.404	464.373	544.728	477.591	554.919	480.027	0.106595	2.08121	0.0374143	0.535709	-0.221863
ENSMUSG00000048000	Gigyf2	protein_coding	453.126	431.64	391.723	558.079	520.917	466.356	470.307	0.107053	2.08006	0.0375202	0.535709	-0.222715
ENSMUSG00000028195	Cyr61	protein_coding	3988.31	3388.52	2501.53	2351.59	1221.18	2350.84	2633.66	0.1296	-2.07953	0.0375685	0.535824	0.268021
ENSMUSG00000024677	Ms4a6b	protein_coding	87.8305	130.177	128.611	158.434	179.348	130.042	135.74	0.130332	2.07805	0.0377049	0.537194	-0.270975
ENSMUSG00000022951	Rcan1	protein_coding	2844.51	3577.42	3781.75	4171.8	3616.19	4493.16	3747.47	0.104711	2.07757	0.0377487	0.537243	-0.217543
ENSMUSG00000001525	Tubb5	protein_coding	534.968	902.431	745.157	602.583	604.545	510.077	649.96	0.120374	-2.07551	0.0379393	0.538434	0.249859
ENSMUSG00000031304	Il2rg	protein_coding	56.8902	78.302	82.468	69.4261	113.856	135.647	89.4315	0.134517	2.07535	0.0379538	0.538434	-0.278891
ENSMUSG00000041688	Amot	protein_coding	263.492	183.031	165.918	257.233	244.841	297.078	235.265	0.125511	2.07569	0.0379229	0.538434	-0.260513
ENSMUSG00000037405	Icam1	protein_coding	2092.96	3336.65	2414.15	2586.57	6245.96	4981.94	3609.7	0.12538	2.07312	0.0381609	0.540221	-0.257746
ENSMUSG00000043639	Rbm20	protein_coding	1926.28	2077.94	2052.86	1643.08	1803.56	1779.1	1880.47	0.0897731	-2.07336	0.0381387	0.540221	0.186133
ENSMUSG00000000948	Gm38393	protein_coding	37.9268	27.4057	32.3981	59.6353	55.4167	38.1156	41.8164	0.132947	2.07168	0.0382951	0.540395	-0.275652
ENSMUSG00000026491	Ahctf1	protein_coding	765.523	720.379	876.713	693.371	637.795	646.844	723.438	0.101974	-2.07248	0.0382209	0.540395	0.211359
ENSMUSG00000074582	Arfgef2	protein_coding	723.604	647.949	653.853	879.398	753.667	776.886	739.226	0.100923	2.07194	0.0382714	0.540395	-0.209124
ENSMUSG00000009013	Dynll1	protein_coding	138.732	183.031	174.754	137.072	116.879	124.436	145.817	0.126507	-2.0682	0.0386213	0.540862	0.261794
ENSMUSG00000019505	Ubb	protein_coding	2184.78	2149.39	2112.75	1817.54	1613.13	2047.03	1987.44	0.0965744	-2.06773	0.0386652	0.540862	0.199689
ENSMUSG00000023944	Hsp90ab1	protein_coding	14749.5	13049	12559.7	11012.1	11350.3	12380.8	12516.9	0.0908398	-2.06794	0.0386454	0.540862	0.187851
ENSMUSG00000029624	Ptcd1	protein_coding	164.682	196.734	182.608	167.335	115.871	130.042	159.545	0.126723	-2.06899	0.0385473	0.540862	0.262374
ENSMUSG00000042436	Mfap4	protein_coding	35.9307	82.2171	43.1975	72.0964	101.765	73.9891	68.1993	0.133891	2.06942	0.0385064	0.540862	-0.276889
ENSMUSG00000044258	Ctla2a	protein_coding	217.58	147.795	182.608	149.533	110.833	151.341	159.948	0.128684	-2.06834	0.0386083	0.540862	0.266223
ENSMUSG00000060716	Plekhh1	protein_coding	11.9769	16.6392	17.6717	22.252	45.3409	20.1789	22.3433	0.119774	2.06943	0.0385058	0.540862	-0.246819
ENSMUSG00000070583	Fv1	protein_coding	93.819	54.8114	62.8327	91.6781	99.75	108.742	85.2721	0.133891	2.06699	0.0387346	0.540862	-0.276735
ENSMUSG00000108994	Gm31663	transcribed_unprocessed_pseudogene	96.8132	63.6204	63.8145	96.1285	89.6742	134.526	90.7628	0.134061	2.06734	0.0387022	0.540862	-0.277024
ENSMUSG00000113491	AC166827.1	processed_pseudogene	30.9403	28.3845	27.4893	33.823	53.4015	52.6892	37.788	0.132037	2.07003	0.0384499	0.540862	-0.273019
ENSMUSG00000052688	Rab7b	protein_coding	22.9557	19.5755	24.544	15.1313	7.05303	11.2105	16.745	0.115702	-2.06655	0.038777	0.540886	0.238372
ENSMUSG00000105096	Gbp10	protein_coding	13.973	17.618	9.81762	16.9115	36.2727	26.9051	20.2497	0.118379	2.06394	0.039023	0.543747	-0.242994
ENSMUSG00000045761	Togaram2	protein_coding	45.9114	35.2359	52.0334	70.3162	59.447	67.2629	55.0345	0.134557	2.06256	0.039154	0.545002	-0.2777
ENSMUSG00000030551	Nr2f2	protein_coding	73.8575	81.2384	83.4497	71.2063	52.3939	38.1156	66.7102	0.134562	-2.06169	0.0392372	0.54502	0.277886
ENSMUSG00000050541	Adra1b	protein_coding	123.761	143.88	163.954	180.686	185.394	190.578	164.709	0.123678	2.06174	0.0392326	0.54502	-0.255067
ENSMUSG00000037731	Themis2	protein_coding	38.9249	50.8963	45.161	43.6138	86.6515	77.3523	57.1	0.133932	2.06116	0.039288	0.545157	-0.275725
ENSMUSG00000037172	E330009J07Rik	protein_coding	31.9384	27.4057	40.2522	52.5146	54.4091	47.084	42.2673	0.133555	2.05987	0.0394106	0.546289	-0.275271
ENSMUSG00000051331	Cacna1c	protein_coding	2926.35	2741.55	2702.79	3213.18	3254.47	3141.18	2996.59	0.0856927	2.05734	0.0396536	0.549085	-0.176301
ENSMUSG00000024349	Tmem173	protein_coding	299.422	382.701	447.683	526.926	396.985	505.592	426.552	0.119996	2.05467	0.039911	0.551501	-0.246575
ENSMUSG00000029321	Slc10a6	protein_coding	361.303	342.571	501.68	496.664	487.667	517.924	451.302	0.116118	2.05501	0.0398783	0.551501	-0.238637
ENSMUSG00000076609	Igkc	IG_C_gene	7.9846	10.7665	2.94529	24.0321	7.05303	21.2999	12.3469	0.100076	2.05355	0.0400193	0.552424	-0.202353
ENSMUSG00000005410	Mcm5	protein_coding	20.9596	45.0237	27.4893	11.571	24.1818	14.5736	23.9665	0.120741	-2.05194	0.0401759	0.552807	0.246517
ENSMUSG00000023224	Serping1	protein_coding	730.59	834.896	757.92	935.472	993.47	830.696	847.174	0.100787	2.05213	0.0401575	0.552807	-0.206844
ENSMUSG00000031453	Rasa3	protein_coding	248.521	294.611	268.021	301.737	385.902	321.741	303.422	0.115722	2.05257	0.040114	0.552807	-0.237555
ENSMUSG00000098708	Gm27252	processed_transcript	52.8979	39.151	42.2158	22.252	36.2727	24.663	36.2421	0.1314	-2.05155	0.0402132	0.552807	0.269386
ENSMUSG00000039737	Prkrip1	protein_coding	80.844	78.302	95.2309	58.7452	56.4242	66.1418	72.6147	0.133616	-2.05091	0.040276	0.553099	0.274167
ENSMUSG00000042453	Reln	protein_coding	59.8845	75.3657	104.067	129.061	124.939	85.1996	96.4196	0.134075	2.05023	0.0403419	0.553276	-0.275065
ENSMUSG00000084911	Gm16185	antisense_RNA	110.786	83.1959	128.611	68.536	72.5455	90.8048	92.4132	0.133284	-2.04992	0.0403721	0.553276	0.273183
ENSMUSG00000021391	Cenpp	protein_coding	21.9576	21.5331	18.6535	12.4611	7.05303	11.2105	15.4781	0.114332	-2.04887	0.0404749	0.554114	0.233339
ENSMUSG00000096687	Mfsd4b4	protein_coding	43.9153	45.0237	36.3252	27.5924	29.2197	20.1789	33.7092	0.131245	-2.04812	0.040548	0.554545	0.269018
ENSMUSG00000022357	Klhl38	protein_coding	228.559	224.14	268.021	173.565	210.583	187.215	215.347	0.119638	-2.04736	0.0406232	0.555003	0.244989
ENSMUSG00000020422	Tns3	protein_coding	250.517	304.399	232.678	335.56	324.439	316.135	293.955	0.115097	2.04474	0.040881	0.55644	-0.235391
ENSMUSG00000020427	Igfbp3	protein_coding	218.578	255.46	338.708	349.801	370.788	312.772	307.685	0.121444	2.04374	0.0409793	0.55644	-0.248247
ENSMUSG00000022372	Sla	protein_coding	54.8941	65.578	39.2705	96.1285	82.6212	57.1734	65.9443	0.134509	2.04386	0.0409672	0.55644	-0.275145
ENSMUSG00000054364	Rhob	protein_coding	2110.93	2629.97	2383.72	2372.95	3121.47	3082.88	2616.99	0.10578	2.04432	0.0409221	0.55644	-0.216243
ENSMUSG00000072941	Sod3	protein_coding	186.64	176.18	148.246	219.849	210.583	216.362	192.977	0.120375	2.04388	0.0409653	0.55644	-0.246101
ENSMUSG00000090394	4930523C07Rik	protein_coding	281.457	262.312	254.276	259.013	410.083	349.767	302.818	0.121907	2.0448	0.040875	0.55644	-0.249253
ENSMUSG00000028978	Nos3	protein_coding	137.734	158.562	166.899	137.962	83.6288	122.194	134.497	0.130421	-2.04328	0.0410248	0.55649	0.266631
ENSMUSG00000040723	Rcsd1	protein_coding	799.458	847.62	768.719	622.165	751.652	658.055	741.278	0.101461	-2.0422	0.0411315	0.556802	0.207212
ENSMUSG00000069763	Tmem100	protein_coding	286.447	184.989	242.495	166.445	192.447	192.82	210.94	0.125063	-2.04229	0.0411232	0.556802	0.25542
ENSMUSG00000023088	Abcc1	protein_coding	512.012	485.473	519.352	404.986	419.152	446.177	464.525	0.103306	-2.04026	0.0413244	0.558846	0.210782
ENSMUSG00000024603	Dctn4	protein_coding	583.874	730.167	841.37	635.516	580.364	536.982	651.379	0.112744	-2.03844	0.0415059	0.559925	0.229853
ENSMUSG00000031548	Sfrp1	protein_coding	69.8652	95.92	74.6139	122.831	110.833	95.289	94.8921	0.132245	2.03863	0.0414868	0.559925	-0.269831
ENSMUSG00000052085	Dock8	protein_coding	144.721	112.559	80.5045	153.984	142.068	161.431	132.545	0.131181	2.03819	0.0415305	0.559925	-0.267398
ENSMUSG00000026880	Stom	protein_coding	1606.9	1426.08	1450.06	1840.68	1571.82	1851.97	1624.58	0.0965364	2.03739	0.0416114	0.560449	-0.196684
ENSMUSG00000015202	Cnksr3	protein_coding	393.241	496.239	520.334	687.141	452.402	640.118	531.579	0.11999	2.03587	0.041763	0.560803	-0.244302
ENSMUSG00000026068	Il18rap	protein_coding	15.9692	9.78776	5.89057	28.4825	18.1364	17.9368	16.0339	0.112272	2.03541	0.0418094	0.560803	-0.22727
ENSMUSG00000026663	Atf6	protein_coding	1856.42	1746.14	1839.82	2024.04	2124.98	2112.05	1950.57	0.0874638	2.03265	0.0420883	0.560803	-0.177784
ENSMUSG00000027722	Spata5	protein_coding	115.777	139.965	163.954	105.919	104.788	105.378	122.63	0.129014	-2.03481	0.0418697	0.560803	0.262649
ENSMUSG00000031558	Slit2	protein_coding	32.9365	51.8751	54.9787	65.8658	79.5985	61.6576	57.8187	0.134504	2.0335	0.0420025	0.560803	-0.273637
ENSMUSG00000036918	Ttc7	protein_coding	147.715	127.241	107.994	147.753	164.235	191.699	147.773	0.127437	2.03252	0.0421013	0.560803	-0.259012
ENSMUSG00000039976	Tbc1d16	protein_coding	692.664	582.371	501.68	720.964	689.182	743.255	655.019	0.10854	2.0331	0.0420428	0.560803	-0.220677
ENSMUSG00000042045	Sln	protein_coding	0.998074	0	9.81762	3.56031	60.4545	53.8103	21.4401	0.0427502	2.03423	0.0419286	0.560803	-0.0632596
ENSMUSG00000054720	Lrrc8c	protein_coding	606.829	765.403	736.321	883.848	861.477	779.128	772.168	0.104343	2.03465	0.0418857	0.560803	-0.212322
ENSMUSG00000057133	Chd6	protein_coding	1341.41	990.521	1249.78	975.526	1074.08	919.259	1091.76	0.10681	-2.03583	0.0417675	0.560803	0.217455
ENSMUSG00000061758	Akr1b10	protein_coding	428.174	372.914	449.647	284.825	336.53	390.125	377.036	0.115267	-2.03348	0.0420036	0.560803	0.234372
ENSMUSG00000017737	Mmp9	protein_coding	17.9653	18.5967	21.5988	33.823	31.2348	33.6314	26.1417	0.127819	2.03033	0.0423232	0.562239	-0.259425
ENSMUSG00000018076	Med13l	protein_coding	602.837	663.61	569.422	731.644	696.235	746.618	668.394	0.100202	2.03041	0.0423146	0.562239	-0.203462
ENSMUSG00000029082	Bst1	protein_coding	18.9634	19.5755	15.7082	32.9329	30.2273	30.2683	24.6126	0.126595	2.02979	0.0423781	0.562239	-0.256847
ENSMUSG00000054659	Pm20d2	protein_coding	228.559	276.993	223.842	271.474	312.348	326.225	273.24	0.116835	2.03013	0.0423437	0.562239	-0.237199
ENSMUSG00000075595	Zfp652	protein_coding	484.066	512.878	468.3	582.111	591.447	563.887	533.782	0.100818	2.02858	0.0425008	0.563305	-0.204535
ENSMUSG00000024589	Nedd4l	protein_coding	408.212	413.043	426.085	359.592	327.462	349.767	380.693	0.106124	-2.02592	0.0427726	0.564657	0.215035
ENSMUSG00000031778	Cx3cl1	protein_coding	112.782	153.668	96.2126	153.984	179.348	150.22	141.036	0.129672	2.02627	0.0427368	0.564657	-0.262828
ENSMUSG00000038517	Tbkbp1	protein_coding	85.8344	104.729	118.793	88.1178	74.5606	58.2945	88.3882	0.133397	-2.02625	0.0427393	0.564657	0.270621
ENSMUSG00000038900	Rpl12	protein_coding	1189.7	1339.94	1371.52	1060.08	1083.14	1186.07	1205.08	0.0961659	-2.0266	0.0427034	0.564657	0.194891
ENSMUSG00000026042	Col5a2	protein_coding	310.401	335.72	267.039	451.27	388.924	307.167	343.42	0.119609	2.02476	0.0428919	0.565671	-0.242258
ENSMUSG00000060739	Nsa2	protein_coding	420.189	388.574	420.194	315.088	343.583	359.856	374.581	0.107713	-2.0229	0.0430831	0.56763	0.217904
ENSMUSG00000027750	Postn	protein_coding	409.21	530.496	531.133	606.143	687.167	517.924	547.012	0.113975	2.02212	0.0431634	0.568127	-0.230501
ENSMUSG00000017679	Ttpal	protein_coding	547.943	597.053	596.911	469.961	400.008	559.403	528.546	0.111026	-2.02106	0.043274	0.56902	0.224388
ENSMUSG00000037331	Larp1	protein_coding	1190.7	1223.47	1076.01	1370.72	1304.81	1387.86	1258.93	0.093378	2.02008	0.0433746	0.569779	-0.188635
ENSMUSG00000028047	Thbs3	protein_coding	20.9596	30.342	23.5623	48.0642	33.25	40.3577	32.756	0.130434	2.01798	0.0435931	0.571808	-0.26328
ENSMUSG00000049130	C5ar1	protein_coding	134.74	168.349	140.392	221.63	183.379	167.036	169.254	0.125275	2.01777	0.043615	0.571808	-0.252925
ENSMUSG00000036553	Sh3tc1	protein_coding	56.8902	78.302	55.9604	48.9543	42.3182	36.9946	53.2366	0.13444	-2.0173	0.0436646	0.571894	0.271514
ENSMUSG00000017740	Slc12a5	protein_coding	12.975	15.6604	8.83586	23.142	23.1742	24.663	18.0751	0.118634	2.0163	0.043769	0.572135	-0.238483
ENSMUSG00000042428	Mgat3	protein_coding	14.9711	28.3845	19.6352	27.5924	42.3182	38.1156	28.5028	0.126995	2.0165	0.043748	0.572135	-0.255562
ENSMUSG00000036097	Slf2	protein_coding	422.185	376.829	389.759	322.208	325.447	338.556	362.498	0.107471	-2.01184	0.0442372	0.577122	0.216237
ENSMUSG00000038214	Bend3	protein_coding	117.773	100.814	78.5409	126.391	127.962	143.494	115.829	0.130286	2.01214	0.044205	0.577122	-0.262198
ENSMUSG00000038642	Ctss	protein_coding	153.703	172.265	117.811	216.289	211.591	154.705	171.061	0.128221	2.0112	0.0443043	0.577432	-0.258008
ENSMUSG00000055172	C1ra	protein_coding	102.802	132.135	130.574	161.994	152.144	160.31	139.993	0.126119	2.00944	0.0444908	0.5787	-0.253534
ENSMUSG00000068749	Psma5	protein_coding	393.241	349.423	364.234	308.857	295.22	310.53	336.917	0.108789	-2.00905	0.0445321	0.5787	0.218596
ENSMUSG00000081485	Gm12338	processed_pseudogene	129.75	129.198	112.903	86.3376	92.697	102.015	108.817	0.129264	-2.0093	0.0445055	0.5787	0.259803
ENSMUSG00000025597	Klhl4	protein_coding	58.8864	73.4082	75.5957	50.7345	49.3712	43.7209	58.6195	0.134531	-2.00759	0.0446869	0.579579	0.270363
ENSMUSG00000027200	Sema6d	protein_coding	512.012	528.539	565.495	487.763	409.076	442.814	490.95	0.105307	-2.00786	0.0446583	0.579579	0.211475
ENSMUSG00000020123	Avpr1a	protein_coding	24.9519	30.342	25.5258	33.823	44.3333	51.5682	35.0907	0.13145	2.00517	0.0449444	0.580092	-0.263304
ENSMUSG00000031506	Ptpn7	protein_coding	8.98267	15.6604	9.81762	6.23055	3.02273	3.36314	7.84619	0.0919665	-2.00576	0.0448821	0.580092	0.182039
ENSMUSG00000036437	Npy1r	protein_coding	16.9673	16.6392	17.6717	7.12063	11.0833	5.60524	12.5146	0.107954	-2.00519	0.0449422	0.580092	0.215137
ENSMUSG00000039634	Zfp189	protein_coding	57.8883	61.6629	71.6686	99.6888	76.5758	89.6838	76.1947	0.133535	2.0057	0.0448878	0.580092	-0.26804
ENSMUSG00000041920	Slc16a6	protein_coding	68.8671	60.6841	59.8875	87.2277	92.697	81.8365	75.2	0.133166	2.00555	0.0449038	0.580092	-0.26726
ENSMUSG00000027398	Il1b	protein_coding	80.844	166.392	174.754	163.774	285.144	339.677	201.764	0.11863	2.0019	0.0452958	0.584062	-0.234578
ENSMUSG00000064326	Siva1	protein_coding	83.8382	79.2808	89.3403	61.4154	55.4167	65.0208	72.3854	0.133457	-2.00077	0.0454171	0.585058	0.267183
ENSMUSG00000005774	Rfx5	protein_coding	48.9056	57.7478	45.161	56.0749	91.6894	73.9891	62.2613	0.134571	1.99831	0.0456831	0.585139	-0.268861
ENSMUSG00000020441	2310033P09Rik	protein_coding	48.9056	39.151	37.3069	28.4825	23.1742	26.9051	33.9876	0.131495	-1.99768	0.0457517	0.585139	0.262749
ENSMUSG00000021003	Galc	protein_coding	97.8113	62.6416	66.7598	120.161	110.833	85.1996	90.5677	0.133743	1.99754	0.0457663	0.585139	-0.26733
ENSMUSG00000024691	Fam111a	protein_coding	144.721	169.328	189.48	156.654	105.795	117.71	147.281	0.128966	-1.99746	0.0457751	0.585139	0.257796
ENSMUSG00000025372	Baiap2	protein_coding	96.8132	98.8563	90.3221	137.072	122.924	116.589	110.429	0.128818	1.99756	0.0457644	0.585139	-0.257504
ENSMUSG00000032410	Xrn1	protein_coding	395.237	482.536	450.629	453.05	619.659	558.282	493.232	0.113368	1.99915	0.0455923	0.585139	-0.226635
ENSMUSG00000038022	Mindy4	protein_coding	28.9442	34.2571	43.1975	66.7559	44.3333	51.5682	44.8427	0.133412	1.99796	0.0457212	0.585139	-0.266749
ENSMUSG00000049299	Trappc1	protein_coding	195.623	181.073	176.717	129.951	153.152	152.462	164.83	0.122672	-2.00019	0.0454797	0.585139	0.245407
ENSMUSG00000073489	Ifi204	protein_coding	414.201	778.127	749.084	698.712	1350.15	1395.7	897.663	0.122978	1.9963	0.0459017	0.586194	-0.243203
ENSMUSG00000018593	Sparc	protein_coding	1782.56	2262.93	2078.39	1847.8	1793.48	1507.81	1878.83	0.102866	-1.99552	0.0459858	0.586704	0.20528
ENSMUSG00000070867	Trabd2b	protein_coding	1280.53	1382.03	1358.76	1475.75	1534.54	1647.94	1446.59	0.0918296	1.99416	0.0461347	0.588041	-0.183123
ENSMUSG00000018821	Avpi1	protein_coding	53.896	58.7265	37.3069	30.2627	33.25	33.6314	41.1789	0.133029	-1.9935	0.0462069	0.588397	0.265151
ENSMUSG00000026683	Nuf2	protein_coding	2.99422	20.5543	10.7994	0	4.0303	6.72629	7.51741	0.0794738	-1.99056	0.0465291	0.590518	0.150571
ENSMUSG00000030871	Ears2	protein_coding	84.8363	84.1747	81.4862	66.7559	63.4773	48.205	71.4892	0.133818	-1.99041	0.0465456	0.590518	0.266691
ENSMUSG00000032193	Ldlr	protein_coding	126.755	120.389	147.264	171.785	166.25	167.036	149.913	0.12419	1.99036	0.0465509	0.590518	-0.247279
ENSMUSG00000052212	Cd177	protein_coding	3.9923	10.7665	8.83586	13.3512	16.1212	22.421	12.5813	0.10598	1.99082	0.046501	0.590518	-0.208975
ENSMUSG00000001138	Cnnm3	protein_coding	115.777	138.986	149.228	115.71	105.795	79.5944	117.515	0.130567	-1.98796	0.0468161	0.591064	0.259812
ENSMUSG00000021127	Zfp36l1	protein_coding	266.486	327.89	313.182	349.801	345.598	421.514	337.412	0.114276	1.98831	0.0467778	0.591064	-0.22722
ENSMUSG00000026678	Rgs5	protein_coding	6456.54	6681.12	7372.05	7943.95	7985.04	7564.83	7333.92	0.0869277	1.98812	0.0467979	0.591064	-0.172824
ENSMUSG00000031557	Plekha2	protein_coding	204.605	205.543	234.641	198.487	338.545	301.562	247.231	0.126608	1.988	0.0468114	0.591064	-0.251643
ENSMUSG00000066113	Adamtsl1	protein_coding	13.973	11.7453	13.7447	21.3619	29.2197	22.421	18.7443	0.11987	1.98876	0.046728	0.591064	-0.237789
ENSMUSG00000001493	Meox1	protein_coding	116.775	188.904	115.848	147.753	232.75	192.82	165.808	0.132107	1.98699	0.0469232	0.591242	-0.262435
ENSMUSG00000025790	Slco3a1	protein_coding	1087.9	902.431	958.199	1082.34	1234.28	1155.8	1070.16	0.0993362	1.98688	0.0469357	0.591242	-0.19737
ENSMUSG00000032925	Itgbl1	protein_coding	90.8248	140.944	87.3768	150.423	173.303	113.226	126.016	0.132838	1.98635	0.0469941	0.591242	-0.263971
ENSMUSG00000085438	1700020I14Rik	lincRNA	4820.7	4029.62	4174.45	4916.79	5128.56	5002.11	4678.71	0.0910375	1.98623	0.0470079	0.591242	-0.180821
ENSMUSG00000021481	Zfp346	protein_coding	84.8363	100.814	123.702	134.402	138.038	136.768	119.76	0.12934	1.98548	0.0470909	0.591727	-0.256903
ENSMUSG00000054855	Rnd1	protein_coding	387.253	699.825	736.321	595.462	1393.48	1690.54	917.146	0.111091	1.98475	0.0471718	0.592184	-0.21625
ENSMUSG00000019054	Fis1	protein_coding	533.97	477.642	519.352	414.777	451.394	419.272	469.401	0.103954	-1.98334	0.0473293	0.592865	0.206195
ENSMUSG00000033871	Ppargc1b	protein_coding	128.752	91.0261	102.103	75.6567	64.4849	94.168	92.6984	0.133129	-1.98349	0.0473131	0.592865	0.264043
ENSMUSG00000039699	Batf2	protein_coding	8.98267	21.5331	15.7082	9.79086	44.3333	39.2367	23.2641	0.112376	1.98307	0.0473597	0.592865	-0.22019
ENSMUSG00000022272	Myo10	protein_coding	631.781	632.289	508.553	700.492	708.326	702.897	647.39	0.104104	1.98158	0.047526	0.593295	-0.2063
ENSMUSG00000024163	Mapk8ip3	protein_coding	702.644	589.223	522.297	721.854	723.439	730.923	665.063	0.106652	1.98179	0.0475027	0.593295	-0.211368
ENSMUSG00000038023	Atp6v0a2	protein_coding	473.087	395.425	400.559	480.642	533.008	510.077	465.466	0.106876	1.98157	0.0475278	0.593295	-0.21179
ENSMUSG00000020019	Ntn4	protein_coding	71.8614	109.623	118.793	158.434	142.068	108.742	118.254	0.132644	1.98063	0.0476332	0.594054	-0.262895
ENSMUSG00000023170	Gps2	protein_coding	143.723	138.986	134.501	106.809	123.932	85.1996	122.192	0.128995	-1.97821	0.0479046	0.594652	0.255361
ENSMUSG00000026670	Uap1	protein_coding	1039	842.726	1022.01	1129.51	1105.31	1187.19	1054.29	0.0998859	1.97938	0.0477732	0.594652	-0.197714
ENSMUSG00000026842	Abl1	protein_coding	383.261	456.109	410.376	386.294	315.371	322.862	379.046	0.111901	-1.9789	0.0478276	0.594652	0.221499
ENSMUSG00000042675	Ypel3	protein_coding	162.686	186.946	195.371	154.874	131.992	140.131	162	0.123542	-1.97932	0.0477804	0.594652	0.244654
ENSMUSG00000050029	Rap2c	protein_coding	355.314	436.534	383.869	489.543	451.394	473.082	431.623	0.107691	1.97844	0.0478787	0.594652	-0.213087
ENSMUSG00000110237	Gm18258	processed_pseudogene	9.98074	18.5967	13.7447	4.45039	7.05303	6.72629	10.092	0.1004	-1.97614	0.0481391	0.597005	0.19604
ENSMUSG00000075486	Commd6	protein_coding	99.8074	105.708	107.994	73.8765	92.697	63.8997	90.6637	0.132257	-1.97502	0.0482654	0.598015	0.261405
ENSMUSG00000025959	Klf7	protein_coding	384.259	399.34	524.261	469.071	564.242	577.339	486.419	0.115035	1.97398	0.0483836	0.59886	-0.22707
ENSMUSG00000037905	Bri3bp	protein_coding	274.47	253.503	220.896	313.308	316.379	289.23	277.964	0.114482	1.97363	0.0484236	0.59886	-0.225991
ENSMUSG00000001416	Cct3	protein_coding	1143.79	892.643	879.658	736.095	794.977	892.354	889.92	0.108256	-1.97193	0.0486171	0.600694	0.213466
ENSMUSG00000036225	Kctd1	protein_coding	40.921	63.6204	59.8875	78.3269	73.553	81.8365	66.3576	0.134404	1.97097	0.0487278	0.601011	-0.265029
ENSMUSG00000051343	Rab11fip5	protein_coding	568.902	670.461	622.437	781.489	675.076	749.981	678.058	0.102527	1.97092	0.048733	0.601011	-0.202086
ENSMUSG00000039458	Mtmr12	protein_coding	230.555	234.906	225.805	250.112	283.129	322.862	257.895	0.116447	1.96933	0.0489157	0.602705	-0.229316
ENSMUSG00000073599	Ecscr	protein_coding	122.763	153.668	179.662	137.962	87.6591	113.226	132.49	0.131384	-1.96878	0.0489782	0.602917	0.25882
ENSMUSG00000021057	Akap5	protein_coding	19.9615	9.78776	10.7994	3.56031	10.0758	2.2421	9.40446	0.0940068	-1.96657	0.0492324	0.603256	0.181697
ENSMUSG00000023951	Vegfa	protein_coding	2290.58	1821.5	1799.57	2575.89	2073.59	2390.07	2158.53	0.104474	1.96734	0.0491444	0.603256	-0.205536
ENSMUSG00000027404	Snrpb	protein_coding	447.137	466.876	438.847	347.131	371.795	411.424	413.869	0.106779	-1.96715	0.0491665	0.603256	0.210052
ENSMUSG00000043505	Gimap5	protein_coding	33.9345	49.9176	35.3434	52.5146	76.5758	50.4471	49.7888	0.133833	1.96781	0.0490896	0.603256	-0.263382
ENSMUSG00000078486	Perm1	protein_coding	2489.2	1901.76	1674.89	2510.91	2348.66	2447.25	2228.78	0.10861	1.96696	0.0491875	0.603256	-0.213631
ENSMUSG00000001211	Agpat3	protein_coding	1460.18	1188.23	1073.07	1561.2	1375.34	1502.2	1360.04	0.105165	1.96491	0.0494247	0.603389	-0.206642
ENSMUSG00000014592	Camta1	protein_coding	1576.96	1427.05	1495.22	1233.65	1302.8	1356.47	1398.69	0.0920796	-1.96511	0.0494011	0.603389	0.180947
ENSMUSG00000023087	Noct	protein_coding	1023.03	1173.55	1080.92	985.317	1365.27	1760.04	1231.35	0.120126	1.96582	0.0493197	0.603389	-0.236111
ENSMUSG00000035517	Tdrd7	protein_coding	168.675	253.503	262.13	217.179	345.598	340.798	264.647	0.129293	1.96541	0.0493672	0.603389	-0.254039
ENSMUSG00000002996	Hbp1	protein_coding	445.141	367.041	488.917	384.514	345.598	334.072	394.214	0.113219	-1.96238	0.0497179	0.606092	0.222223
ENSMUSG00000056492	Adgrf5	protein_coding	4504.31	3992.43	4081.18	5220.31	4893.8	4425.9	4519.65	0.0922121	1.96222	0.0497372	0.606092	-0.180942
ENSMUSG00000019775	Rgs17	protein_coding	12.975	24.4694	16.6899	8.90078	11.0833	5.60524	13.2873	0.108138	-1.96157	0.0498126	0.606455	0.210883
ENSMUSG00000002799	Jag2	protein_coding	172.667	235.885	235.623	181.576	171.288	151.341	191.397	0.124212	-1.95709	0.0503366	0.609675	0.243212
ENSMUSG00000020255	D10Wsu102e	protein_coding	229.557	203.585	156.1	232.31	246.856	266.809	222.536	0.122474	1.95717	0.0503269	0.609675	-0.239711
ENSMUSG00000028878	Fam76a	protein_coding	310.401	322.017	360.307	279.485	287.159	246.63	301	0.112892	-1.95696	0.0503519	0.609675	0.220986
ENSMUSG00000041134	Cyyr1	protein_coding	821.415	910.261	1036.74	1153.54	1098.26	1017.91	1006.35	0.101716	1.95701	0.0503459	0.609675	-0.199072
ENSMUSG00000042590	Ipo11	protein_coding	336.351	326.911	332.817	281.265	284.136	257.841	303.22	0.110101	-1.9574	0.0503	0.609675	0.215564
ENSMUSG00000105556	Gm43080	TEC	6.98652	4.89388	8.83586	24.0321	15.1136	7.84733	11.2849	0.101005	1.95788	0.0502446	0.609675	-0.195975
ENSMUSG00000020250	Txnrd1	protein_coding	1463.18	1408.46	1219.35	1699.16	1364.26	1819.46	1495.64	0.105639	1.95551	0.0505234	0.61064	-0.206576
ENSMUSG00000070544	Top1	protein_coding	1338.42	1439.78	1530.57	1113.49	1158.71	1387.86	1328.14	0.100587	-1.95568	0.0505026	0.61064	0.196712
ENSMUSG00000040152	Thbs1	protein_coding	5549.29	8840.3	8828.98	9506.04	8610.74	10510.9	8641.05	0.116225	1.95461	0.0506297	0.61137	-0.227163
ENSMUSG00000006611	Hfe	protein_coding	388.251	340.614	317.109	436.138	374.818	460.751	386.28	0.112018	1.95325	0.0507901	0.61186	-0.218812
ENSMUSG00000022035	Ccdc25	protein_coding	282.455	279.93	286.674	319.538	356.682	349.767	312.508	0.109845	1.95296	0.0508241	0.61186	-0.21454
ENSMUSG00000029019	Nppb	protein_coding	3826.62	3551	2463.24	2748.56	1986.94	3094.09	2945.07	0.121175	-1.95366	0.0507413	0.61186	0.236714
ENSMUSG00000030353	Tead4	protein_coding	64.8748	79.2808	105.049	72.0964	22.1667	65.0208	68.0813	0.131927	-1.95271	0.0508542	0.61186	0.257242
ENSMUSG00000030538	Cib1	protein_coding	60.8825	56.769	49.0881	44.5039	32.2424	34.7525	46.3731	0.134091	-1.95146	0.0510029	0.611989	0.261966
ENSMUSG00000032243	Itga11	protein_coding	11.9769	11.7453	9.81762	22.252	26.197	15.6947	16.2806	0.11555	1.95164	0.0509807	0.611989	-0.224859
ENSMUSG00000079012	Serpina3m	protein_coding	4.99037	5.87265	5.89057	10.6809	19.1439	10.0894	9.44465	0.0982045	1.95209	0.0509271	0.611989	-0.189608
ENSMUSG00000019731	Slc35e1	protein_coding	958.151	962.136	893.403	1071.65	1101.28	1080.69	1011.22	0.0926507	1.95091	0.0510676	0.612213	-0.180758
ENSMUSG00000045071	E130308A19Rik	protein_coding	71.8614	60.6841	51.0516	84.5575	86.6515	82.9575	72.9606	0.133724	1.95039	0.0511292	0.61237	-0.26095
ENSMUSG00000073600	Prob1	protein_coding	594.852	569.647	483.027	624.835	682.129	651.329	600.97	0.104245	1.95003	0.0511728	0.61237	-0.203287
ENSMUSG00000031683	Lsm6	protein_coding	204.605	175.201	168.863	133.512	121.917	171.52	162.603	0.12623	-1.94826	0.0513835	0.613558	0.245919
ENSMUSG00000033618	Map3k13	protein_coding	11.9769	9.78776	6.87233	17.8016	19.1439	20.1789	14.2936	0.112216	1.94804	0.0514103	0.613558	-0.217517
ENSMUSG00000049881	2810025M15Rik	transcribed_processed_pseudogene	105.796	114.517	137.447	101.469	74.5606	90.8048	104.099	0.131342	-1.94879	0.0513206	0.613558	0.256134
ENSMUSG00000005672	Kit	protein_coding	35.9307	69.4931	87.3768	50.7345	36.2727	36.9946	52.8004	0.132341	-1.94619	0.0516324	0.614341	0.257536
ENSMUSG00000020357	Flt4	protein_coding	164.682	205.543	207.152	248.332	253.909	218.604	216.37	0.119935	1.94631	0.0516175	0.614341	-0.233508
ENSMUSG00000040752	Myh6	protein_coding	267962	206429	227485	199295	193463	210010	217441	0.0959811	-1.94595	0.0516606	0.614341	0.186773
ENSMUSG00000078515	Ddi2	protein_coding	715.619	741.912	860.023	714.733	619.659	615.455	711.234	0.104143	-1.94606	0.0516477	0.614341	0.202693
ENSMUSG00000027082	Tfpi	protein_coding	957.153	878.94	1120.19	753.896	896.742	835.18	907.017	0.10485	-1.94422	0.0518687	0.615823	0.203853
ENSMUSG00000046207	Pik3r6	protein_coding	88.8286	98.8563	62.8327	144.193	112.848	88.5628	99.3536	0.133779	1.94415	0.0518778	0.615823	-0.26029
ENSMUSG00000020185	E2f7	protein_coding	18.9634	28.3845	58.9057	33.823	8.06061	11.2105	26.5579	0.112323	-1.94194	0.0521439	0.615947	0.216592
ENSMUSG00000024558	Mapk4	protein_coding	61.8806	68.5143	51.0516	81.8872	97.7349	72.8681	72.3228	0.13403	1.93997	0.0523832	0.615947	-0.260177
ENSMUSG00000024935	Slc1a1	protein_coding	70.8633	66.5567	76.5774	76.5467	93.7045	127.799	85.3414	0.133818	1.9419	0.052149	0.615947	-0.259725
ENSMUSG00000032497	Lrrfip2	protein_coding	1426.25	1329.18	1453.99	1263.02	1126.47	1246.6	1307.59	0.0934808	-1.94152	0.0521949	0.615947	0.181501
ENSMUSG00000035299	Mid1	protein_coding	43.9153	77.3233	85.4133	32.0428	44.3333	60.5366	57.2608	0.133211	-1.94106	0.0522511	0.615947	0.258026
ENSMUSG00000043279	Trim56	protein_coding	687.673	1107.97	1086.81	930.132	1385.42	1353.1	1091.85	0.124023	1.94261	0.0520637	0.615947	-0.240892
ENSMUSG00000052914	Cyp2j6	protein_coding	66.871	77.3233	87.3768	64.0856	52.3939	47.084	65.8558	0.134369	-1.94013	0.0523638	0.615947	0.261019
ENSMUSG00000061601	Pclo	protein_coding	7.9846	5.87265	2.94529	12.4611	16.1212	11.2105	9.43255	0.0980501	1.93985	0.0523974	0.615947	-0.188093
ENSMUSG00000067851	Arfgef1	protein_coding	1874.38	1741.24	1789.75	1993.78	2034.3	2170.35	1933.97	0.088938	1.94085	0.0522766	0.615947	-0.172615
ENSMUSG00000073016	Uprt	protein_coding	42.9172	33.2784	39.2705	65.8658	57.4318	47.084	47.6413	0.134173	1.94329	0.051981	0.615947	-0.261001
ENSMUSG00000074909	Ranbp6	protein_coding	137.734	149.753	146.282	187.807	228.72	144.615	165.818	0.127323	1.9422	0.0521132	0.615947	-0.247398
ENSMUSG00000030166	Rad52	protein_coding	110.786	94.9412	96.2126	63.1956	75.5682	85.1996	87.6506	0.132413	-1.93881	0.0525243	0.616408	0.256718
ENSMUSG00000053175	Bcl3	protein_coding	249.519	346.487	367.179	370.273	420.159	403.577	359.532	0.117991	1.93839	0.0525756	0.616408	-0.228727
ENSMUSG00000054966	Lmntd1	protein_coding	5.98845	7.8302	6.87233	7.12063	32.2424	10.0894	11.6906	0.0971916	1.93841	0.0525731	0.616408	-0.185108
ENSMUSG00000000563	Atp5f1	protein_coding	9868.96	9368.84	9976.66	7830.91	8034.41	9469.49	9091.54	0.0918876	-1.9372	0.0527205	0.61702	0.178004
ENSMUSG00000042726	Trafd1	protein_coding	530.976	697.867	734.358	613.264	931	915.896	737.227	0.12067	1.93757	0.0526759	0.61702	-0.233778
ENSMUSG00000024052	Lpin2	protein_coding	155.7	131.156	118.793	178.016	174.311	164.794	153.795	0.124758	1.93665	0.0527885	0.617273	-0.2417
ENSMUSG00000052544	St6galnac3	protein_coding	21.9576	17.618	18.6535	35.6031	34.2576	26.9051	25.8325	0.127183	1.93572	0.052902	0.618057	-0.246185
ENSMUSG00000021796	Bmpr1a	protein_coding	1249.59	1103.08	1188.91	872.277	1004.55	1124.41	1090.47	0.102341	-1.93422	0.0530865	0.619362	0.197941
ENSMUSG00000024099	Ndufv2	protein_coding	5155.05	4894.86	5154.25	4077.45	4269.1	4869.83	4736.76	0.0909131	-1.93405	0.0531068	0.619362	0.175829
ENSMUSG00000112794	AC160029.2	TEC	6.98652	5.87265	9.81762	19.5817	15.1136	13.4526	11.8041	0.106029	1.93264	0.0532809	0.620848	-0.203749
ENSMUSG00000029403	Cdkl2	protein_coding	72.8594	76.3445	81.4862	97.9086	93.7045	118.831	90.1891	0.13184	1.93225	0.0533288	0.620863	-0.2548
ENSMUSG00000026283	Ing5	protein_coding	114.779	113.538	132.538	154.874	145.091	162.552	137.228	0.125593	1.93175	0.0533899	0.621031	-0.24269
ENSMUSG00000060260	Pwwp2b	protein_coding	38.9249	45.0237	48.1063	58.7452	68.5152	62.7787	53.6823	0.134573	1.93097	0.0534868	0.621615	-0.25998
ENSMUSG00000016206	H2-M3	protein_coding	27.9461	34.2571	43.1975	38.2734	76.5758	49.3261	44.9293	0.131986	1.92964	0.053651	0.621893	-0.254391
ENSMUSG00000025937	Lactb2	protein_coding	351.322	331.805	324.963	308.857	261.97	257.841	306.126	0.112457	-1.93	0.0536069	0.621893	0.217109
ENSMUSG00000045201	Lrrc3b	protein_coding	77.8498	83.1959	102.103	48.0642	77.5833	62.7787	75.2625	0.134265	-1.93027	0.053574	0.621893	0.25913
ENSMUSG00000042202	Slc35e2	protein_coding	137.734	105.708	86.395	75.6567	78.5909	88.5628	95.4412	0.132917	-1.92876	0.0537612	0.622629	0.256373
ENSMUSG00000010660	Plcd1	protein_coding	168.675	143.88	123.702	172.675	192.447	190.578	165.326	0.124492	1.92834	0.0538123	0.622679	-0.240095
ENSMUSG00000068184	Ndufaf2	protein_coding	181.65	134.092	156.1	112.15	126.955	126.678	139.604	0.127124	-1.92556	0.054159	0.626146	0.244827
ENSMUSG00000031762	Mt2	protein_coding	185.642	153.668	116.83	194.037	192.447	415.909	209.755	0.121989	1.92461	0.0542788	0.626986	-0.232635
ENSMUSG00000028896	Rcc1	protein_coding	45.9114	53.8327	56.9422	37.3833	25.1894	41.4788	43.4563	0.133427	-1.92347	0.0544213	0.628087	0.256638
ENSMUSG00000109324	Prmt1	protein_coding	369.288	375.85	388.778	302.627	295.22	346.404	346.361	0.109369	-1.92287	0.054496	0.628404	0.210313
ENSMUSG00000013846	St3gal1	protein_coding	715.619	784.978	855.114	881.178	892.712	993.248	853.808	0.100344	1.92165	0.0546503	0.629637	-0.192825
ENSMUSG00000028064	Sema4a	protein_coding	29.9422	41.1086	33.3799	54.2948	37.2803	68.3839	44.0649	0.132821	1.92091	0.0547436	0.629961	-0.254961
ENSMUSG00000034266	Batf	protein_coding	50.9018	50.8963	38.2887	64.0856	62.4697	73.9891	56.7719	0.134571	1.92067	0.054773	0.629961	-0.258519
ENSMUSG00000048027	Rgmb	protein_coding	94.8171	122.347	109.957	103.249	67.5076	67.2629	94.1901	0.133317	-1.92016	0.054838	0.630164	0.256289
ENSMUSG00000060036	Rpl3	protein_coding	1034.01	1132.44	1115.28	966.625	940.068	934.954	1020.56	0.0931489	-1.91803	0.0551068	0.632706	0.178671
ENSMUSG00000055447	Cd47	protein_coding	604.833	788.893	766.756	743.216	932.008	931.59	794.549	0.110501	1.91752	0.0551717	0.632904	-0.211881
ENSMUSG00000022892	App	protein_coding	1502.1	1868.48	1851.6	2097.91	2047.39	1947.26	1885.79	0.0978949	1.91647	0.0553059	0.633353	-0.187617
ENSMUSG00000038459	Abhd17c	protein_coding	206.601	226.097	183.589	254.562	235.773	271.293	229.653	0.117832	1.91669	0.0552773	0.633353	-0.225879
ENSMUSG00000022858	Tra2b	protein_coding	686.675	663.61	751.048	613.264	545.099	626.666	647.727	0.101714	-1.91575	0.0553971	0.633612	0.194869
ENSMUSG00000031701	Dnaja2	protein_coding	3356.52	3352.31	3644.3	2973.75	2824.23	3233.1	3230.7	0.0898432	-1.91554	0.0554238	0.633612	0.172098
ENSMUSG00000024525	Impa2	protein_coding	70.8633	77.3233	71.6686	97.9086	80.6061	121.073	86.5738	0.133019	1.91414	0.0556022	0.635106	-0.254636
ENSMUSG00000024959	Bad	protein_coding	64.8748	79.2808	57.9239	41.8337	55.4167	43.7209	57.1751	0.134569	-1.91306	0.0557407	0.635597	0.257527
ENSMUSG00000040433	Zbtb38	protein_coding	700.648	644.034	628.327	532.267	585.402	563.887	609.094	0.100523	-1.91323	0.0557187	0.635597	0.19233
ENSMUSG00000097379	Gm26873	lincRNA	31.9384	25.4482	24.544	23.142	8.06061	13.4526	21.0976	0.119313	-1.91244	0.05582	0.635956	0.227852
ENSMUSG00000020657	Dnajc27	protein_coding	153.703	146.816	159.045	178.016	212.598	186.094	172.712	0.12181	1.91137	0.0559565	0.636966	-0.232876
ENSMUSG00000001518	Itfg2	protein_coding	91.8228	85.1535	85.4133	56.0749	73.553	62.7787	75.7994	0.133334	-1.91079	0.0560321	0.637039	0.254863
ENSMUSG00000022551	Cyc1	protein_coding	4471.37	5104.31	4854.81	3999.12	4113.93	4479.71	4503.88	0.0898252	-1.91058	0.0560587	0.637039	0.171618
ENSMUSG00000002297	Dbf4	protein_coding	21.9576	21.5331	24.544	16.0214	13.0985	6.72629	17.3135	0.116468	-1.90941	0.0562095	0.637721	0.222165
ENSMUSG00000039384	Dusp10	protein_coding	105.796	79.2808	85.4133	48.9543	51.3864	90.8048	76.9393	0.13457	-1.909	0.0562625	0.637721	0.256545
ENSMUSG00000039646	Vasn	protein_coding	136.736	165.413	145.301	117.49	103.78	126.678	132.567	0.126952	-1.90922	0.0562337	0.637721	0.242458
ENSMUSG00000030401	Rtn2	protein_coding	472.089	469.812	506.589	389.854	404.038	430.482	445.478	0.104213	-1.9084	0.0563394	0.63805	0.198889
ENSMUSG00000015966	Il17rb	protein_coding	1.99615	6.85143	3.92705	7.12063	10.0758	16.8157	7.79779	0.0897836	1.90772	0.0564281	0.638122	-0.167959
ENSMUSG00000020612	Prkar1a	protein_coding	4888.57	4480.83	4561.26	5184.71	5046.95	5665.77	4971.35	0.0877643	1.90713	0.0565034	0.638122	-0.167378
ENSMUSG00000023495	Pcbp4	protein_coding	336.351	318.102	294.529	267.024	268.015	248.873	288.815	0.111928	-1.90739	0.0564697	0.638122	0.21354
ENSMUSG00000032555	Topbp1	protein_coding	164.682	182.052	207.152	153.093	150.129	134.526	165.272	0.123547	-1.90687	0.0565376	0.638122	0.235703
ENSMUSG00000019487	Trip10	protein_coding	936.194	889.707	986.671	834.894	759.712	826.212	872.232	0.0963737	-1.90527	0.0567452	0.639381	0.183626
ENSMUSG00000095115	Itpripl2	protein_coding	308.405	492.324	438.847	390.744	298.242	286.988	369.259	0.12434	-1.90548	0.0567171	0.639381	0.236994
ENSMUSG00000053093	Myh7	protein_coding	1450.2	1549.4	1792.7	1861.15	2344.63	1582.92	1763.5	0.111648	1.90345	0.0569813	0.641498	-0.21252
ENSMUSG00000019278	Dpep1	protein_coding	381.264	399.34	377.978	480.642	477.591	418.151	422.495	0.106042	1.90291	0.0570527	0.64155	-0.201821
ENSMUSG00000047888	Tnrc6b	protein_coding	817.423	736.039	689.197	971.076	880.621	793.702	814.676	0.103275	1.90268	0.0570824	0.64155	-0.196516
ENSMUSG00000027282	Mtch2	protein_coding	1367.36	1239.13	1285.13	1091.24	1067.02	1207.37	1209.54	0.0945282	-1.9015	0.0572363	0.642269	0.179746
ENSMUSG00000064349	mt-Tc	Mt_tRNA	33.9345	19.5755	16.6899	30.2627	30.2273	58.2945	31.4974	0.125592	1.90145	0.0572429	0.642269	-0.237768
ENSMUSG00000018845	Unc45b	protein_coding	2007.13	1324.28	1466.75	1238.99	1256.45	1455.12	1458.12	0.113513	-1.90092	0.0573129	0.642513	0.21577
ENSMUSG00000000149	Gna12	protein_coding	908.248	865.238	699.014	997.778	905.811	1025.76	900.308	0.104765	1.89961	0.0574839	0.642806	-0.199016
ENSMUSG00000027615	Hps3	protein_coding	155.7	161.498	171.808	167.335	240.811	212.999	185.025	0.124396	1.89975	0.0574664	0.642806	-0.236319
ENSMUSG00000038970	Lmtk2	protein_coding	417.195	461.003	446.702	534.937	539.053	489.898	481.465	0.103487	1.90026	0.0573988	0.642806	-0.196675
ENSMUSG00000025358	Cdk2	protein_coding	59.8845	97.8776	75.5957	62.3055	55.4167	45.9629	66.1738	0.134565	-1.89905	0.0575579	0.643093	0.255796
ENSMUSG00000019952	Poc1b	protein_coding	58.8864	51.8751	60.8692	42.7238	37.2803	38.1156	48.2917	0.134428	-1.89406	0.0582175	0.646661	0.254845
ENSMUSG00000026090	2010300C02Rik	protein_coding	18.9634	21.5331	14.7264	30.2627	39.2955	23.542	24.7205	0.125137	1.89434	0.0581795	0.646661	-0.236841
ENSMUSG00000027074	Slc43a3	protein_coding	913.238	1147.12	1060.3	1134.85	1384.41	1172.62	1135.42	0.104271	1.89615	0.0579401	0.646661	-0.197716
ENSMUSG00000029178	Klf3	protein_coding	535.966	586.287	658.762	565.2	423.182	486.535	542.655	0.111483	-1.89527	0.0580561	0.646661	0.211325
ENSMUSG00000045377	Tmem88	protein_coding	61.8806	77.3233	72.6504	67.646	35.2652	41.4788	59.374	0.13433	-1.89414	0.0582069	0.646661	0.254775
ENSMUSG00000056124	B4galt6	protein_coding	328.366	343.55	357.361	409.436	422.174	392.367	375.542	0.106461	1.89439	0.0581731	0.646661	-0.201705
ENSMUSG00000109697	Gm34030	lincRNA	13.973	9.78776	15.7082	5.34047	4.0303	7.84733	9.44785	0.0985729	-1.89468	0.0581347	0.646661	0.184505
ENSMUSG00000026872	Zeb2	protein_coding	594.852	656.758	620.473	727.194	741.576	710.744	675.266	0.0977702	1.89343	0.0583004	0.647042	-0.185132
ENSMUSG00000024679	Ms4a6d	protein_coding	144.721	195.755	141.374	212.729	201.515	195.062	181.859	0.124185	1.89171	0.0585294	0.649042	-0.234999
ENSMUSG00000032285	Dnaja4	protein_coding	909.246	889.707	888.494	720.964	715.379	862.086	830.979	0.100073	-1.89097	0.0586279	0.64942	0.189231
ENSMUSG00000102780	Gm38253	TEC	9.98074	7.8302	9.81762	20.4718	18.1364	15.6947	13.6552	0.111281	1.89072	0.0586611	0.64942	-0.209636
ENSMUSG00000020914	Top2a	protein_coding	29.9422	112.559	86.395	54.2948	49.3712	40.3577	62.1534	0.129953	-1.88925	0.0588579	0.649977	0.245068
ENSMUSG00000023150	Ivns1abp	protein_coding	18580.2	16875.1	20784.9	16299.1	16819.5	15876.3	17539.2	0.0913187	-1.88952	0.0588228	0.649977	0.172548
ENSMUSG00000056870	Gulp1	protein_coding	42.9172	46.9812	49.0881	56.965	87.6591	56.0524	56.6105	0.134478	1.88939	0.0588397	0.649977	-0.254137
ENSMUSG00000019966	Kitl	protein_coding	1070.93	1182.36	1196.77	1044.95	848.379	1045.94	1064.89	0.101434	-1.88848	0.0589615	0.650111	0.191563
ENSMUSG00000046186	Cd109	protein_coding	18.9634	46.9812	41.234	24.9222	21.1591	16.8157	28.3459	0.124625	-1.88771	0.0590655	0.650111	0.234976
ENSMUSG00000060438	Rps10-ps1	processed_pseudogene	12.975	15.6604	17.6717	7.12063	9.06818	5.60524	11.3502	0.105207	-1.88819	0.0590008	0.650111	0.197425
ENSMUSG00000069729	Arid1b	protein_coding	385.257	490.367	468.3	542.058	501.773	562.766	491.753	0.108409	1.88789	0.0590408	0.650111	-0.204676
ENSMUSG00000041930	Fam222a	protein_coding	2.99422	9.78776	8.83586	14.2413	11.0833	22.421	11.5606	0.101958	1.88447	0.0595012	0.654366	-0.189984
ENSMUSG00000025938	Slco5a1	protein_coding	541.954	365.083	385.832	321.318	309.326	404.698	388.035	0.121796	-1.88369	0.0596065	0.654983	0.229399
ENSMUSG00000046027	Stard5	protein_coding	53.896	61.6629	51.0516	55.1849	99.75	82.9575	67.4171	0.134574	1.88252	0.0597653	0.655644	-0.253203
ENSMUSG00000062070	Pgk1	protein_coding	1584.94	1531.78	1565.91	1298.62	1310.86	1468.57	1460.11	0.0919251	-1.88272	0.0597379	0.655644	0.173069
ENSMUSG00000020407	Upp1	protein_coding	109.788	112.559	116.83	95.2384	171.288	196.183	133.648	0.133313	1.88161	0.0598885	0.656455	-0.250641
ENSMUSG00000000183	Fgf6	protein_coding	12.975	13.7029	12.7629	3.56031	2.01515	11.2105	9.37111	0.0948597	-1.88048	0.0600427	0.657603	0.174771
ENSMUSG00000000386	Mx1	protein_coding	49.9037	186.946	110.939	118.38	402.023	359.856	204.675	0.0890689	1.87966	0.0601545	0.657745	-0.159894
ENSMUSG00000032231	Anxa2	protein_coding	568.902	637.183	580.221	520.696	440.311	544.829	548.69	0.10606	-1.87987	0.0601255	0.657745	0.199391
ENSMUSG00000035226	Rims4	protein_coding	13.973	13.7029	6.87233	25.8123	22.1667	16.8157	16.5571	0.114856	1.87873	0.0602814	0.658591	-0.215126
ENSMUSG00000035278	Plekhj1	protein_coding	103.8	76.3445	78.5409	59.6353	68.5152	60.5366	74.562	0.133809	-1.87735	0.0604708	0.660119	0.251308
ENSMUSG00000038058	Nod1	protein_coding	212.59	303.42	293.547	305.297	351.644	344.162	301.777	0.119155	1.87408	0.0609199	0.663932	-0.223318
ENSMUSG00000085793	Lin52	protein_coding	121.765	82.2171	101.121	72.0964	91.6894	58.2945	87.864	0.133831	-1.87417	0.0609075	0.663932	0.250954
ENSMUSG00000026697	Myoc	protein_coding	10.9788	12.7241	21.5988	29.3726	40.303	13.4526	21.405	0.116587	1.87356	0.0609917	0.664171	-0.217573
ENSMUSG00000036158	Prickle1	protein_coding	156.698	138.007	126.647	125.501	109.826	86.3207	123.833	0.129656	-1.87229	0.0611666	0.664605	0.242964
ENSMUSG00000037206	Islr	protein_coding	104.798	141.922	127.629	164.665	172.295	142.373	142.28	0.127052	1.87218	0.0611815	0.664605	-0.237979
ENSMUSG00000087107	AI662270	processed_transcript	9.98074	19.5755	14.7264	19.5817	30.2273	29.1472	20.5398	0.120238	1.87245	0.0611439	0.664605	-0.224347
ENSMUSG00000020701	Tmem132e	protein_coding	0.998074	8.80898	7.85409	15.1313	9.06818	17.9368	9.96624	0.0952691	1.87111	0.0613304	0.665571	-0.175568
ENSMUSG00000059456	Ptk2b	protein_coding	82.8402	67.5355	53.0151	99.6888	82.6212	95.289	80.165	0.133706	1.87082	0.0613703	0.665571	-0.250238
ENSMUSG00000084929	Foxo6os	antisense_RNA	63.8768	51.8751	60.8692	40.0535	39.2955	43.7209	49.9485	0.134495	-1.8702	0.061456	0.665957	0.251621
ENSMUSG00000027456	Sdcbp2	protein_coding	26.948	20.5543	20.617	11.571	9.06818	16.8157	17.5957	0.117293	-1.86848	0.0616957	0.667717	0.218125
ENSMUSG00000028709	Mob3c	protein_coding	179.653	192.819	176.717	178.016	248.871	269.051	207.521	0.124522	1.86808	0.0617515	0.667717	-0.232571
ENSMUSG00000033307	Mif	protein_coding	279.461	259.376	245.44	205.608	214.614	224.21	238.118	0.115343	-1.86795	0.061769	0.667717	0.215483
ENSMUSG00000000290	Itgb2	protein_coding	50.9018	96.8988	69.7051	136.182	84.6364	86.3207	87.4408	0.134573	1.86697	0.0619057	0.66811	-0.25139
ENSMUSG00000037815	Ctnna1	protein_coding	5335.71	4800.89	5493.94	4453.95	4486.74	4779.03	4891.71	0.088402	-1.86727	0.0618639	0.66811	0.16507
ENSMUSG00000037225	Fgf2	protein_coding	363.299	364.105	355.398	340.9	278.091	278.02	329.969	0.111993	-1.86625	0.0620064	0.668392	0.209069
ENSMUSG00000050619	Zscan29	protein_coding	75.8537	86.1323	102.103	72.9864	65.4924	53.8103	76.063	0.133811	-1.86571	0.0620825	0.668392	0.249925
ENSMUSG00000055204	Ankrd17	protein_coding	1584.94	1547.44	1615	1682.25	1822.7	1938.29	1698.44	0.0914318	1.8658	0.0620688	0.668392	-0.170592
ENSMUSG00000030747	Dgat2	protein_coding	3135.95	3075.31	2940.38	2713.85	2572.34	2779.08	2869.48	0.0863835	-1.86493	0.0621909	0.669017	0.1611
ENSMUSG00000002031	Ift46	protein_coding	72.8594	76.3445	78.5409	64.0856	58.4394	39.2367	64.9178	0.134481	-1.86372	0.062361	0.670305	0.25099
ENSMUSG00000004319	Clcn3	protein_coding	535.966	507.985	640.109	429.018	513.864	466.356	515.549	0.109427	-1.86302	0.0624592	0.670504	0.203872
ENSMUSG00000031134	Rbmx	protein_coding	330.363	350.402	442.775	318.648	312.348	292.593	341.188	0.114977	-1.86287	0.0624803	0.670504	0.214229
ENSMUSG00000034471	Caskin2	protein_coding	274.47	297.548	323	299.066	214.614	200.668	268.228	0.122258	-1.86053	0.0628101	0.673021	0.227581
ENSMUSG00000039164	Naif1	protein_coding	19.9615	23.4906	20.617	41.8337	34.2576	26.9051	27.8443	0.128112	1.86049	0.0628166	0.673021	-0.238481
ENSMUSG00000053930	Shisa6	protein_coding	20.9596	23.4906	24.544	47.1742	32.2424	30.2683	29.7798	0.128947	1.85978	0.0629171	0.673021	-0.239971
ENSMUSG00000062488	Ifit3b	protein_coding	69.8652	180.095	176.717	112.15	530.992	459.629	254.908	0.0868647	1.86011	0.0628698	0.673021	-0.153782
ENSMUSG00000017652	Cd40	protein_coding	71.8614	123.326	95.2309	86.3376	228.72	227.573	138.841	0.114348	1.8579	0.0631829	0.674963	-0.209575
ENSMUSG00000035900	Gramd4	protein_coding	322.378	333.762	269.984	392.525	383.886	339.677	340.369	0.112653	1.85778	0.0632001	0.674963	-0.209325
ENSMUSG00000005161	Prdx2	protein_coding	1613.89	1611.06	1548.24	1354.7	1359.22	1467.45	1492.43	0.0899056	-1.85629	0.0634122	0.675061	0.166891
ENSMUSG00000021245	Mlh3	protein_coding	146.717	132.135	107.012	158.434	163.227	169.278	146.134	0.126048	1.85648	0.0633852	0.675061	-0.23405
ENSMUSG00000030315	Vgll4	protein_coding	60.8825	74.3869	81.4862	55.1849	56.4242	42.5998	61.8274	0.134515	-1.8572	0.0632825	0.675061	0.250082
ENSMUSG00000035458	Tnni3	protein_coding	32708.9	27945	30328.6	23728.6	25328.4	29596.8	28272.7	0.0961728	-1.85653	0.0633777	0.675061	0.178547
ENSMUSG00000030695	Aldoa	protein_coding	16183.8	15495	15095.6	13398.4	13317.1	14666.7	14692.7	0.0846892	-1.85461	0.0636513	0.67665	0.157065
ENSMUSG00000043467	Zbtb37	protein_coding	159.692	131.156	132.538	181.576	205.545	150.22	160.121	0.126046	1.85382	0.0637649	0.67665	-0.233758
ENSMUSG00000074925	Ptar1	protein_coding	52.8979	40.1298	49.0881	72.0964	73.553	54.9313	57.1161	0.134573	1.85414	0.0637196	0.67665	-0.249727
ENSMUSG00000086784	Isoc2a	protein_coding	268.482	260.354	262.13	307.077	307.311	335.193	290.091	0.110905	1.85427	0.0637008	0.67665	-0.205662
ENSMUSG00000002329	Mdp1	protein_coding	339.345	353.338	376.015	274.144	281.114	334.072	326.338	0.112105	-1.8532	0.0638537	0.677052	0.207752
ENSMUSG00000036469	2024-03-01	protein_coding	42.9172	43.0661	33.3799	54.2948	69.5227	49.3261	48.7511	0.134207	1.85015	0.0642922	0.680244	-0.248406
ENSMUSG00000040048	Ndufb10	protein_coding	3578.1	3249.53	3058.19	2591.91	2757.73	3183.77	3069.87	0.0972232	-1.84964	0.064366	0.680244	0.179824
ENSMUSG00000049265	Kcnk3	protein_coding	1760.6	1580.72	1612.05	1906.55	1804.57	1951.74	1769.37	0.090718	1.85014	0.0642932	0.680244	-0.167842
ENSMUSG00000057396	Zfp759	protein_coding	20.9596	19.5755	23.5623	35.6031	40.303	26.9051	27.8181	0.128243	1.85003	0.0643087	0.680244	-0.237275
ENSMUSG00000066440	Zfyve26	protein_coding	122.763	130.177	120.757	178.016	156.174	139.01	141.149	0.125868	1.84933	0.0644103	0.680244	-0.232912
ENSMUSG00000029670	Ing3	protein_coding	184.644	153.668	183.589	141.522	134.008	140.131	156.26	0.123654	-1.8483	0.0645594	0.681279	0.228626
ENSMUSG00000037849	Ifi206	protein_coding	22.9557	62.6416	35.3434	38.2734	147.106	98.6522	67.4954	0.0937574	1.84717	0.0647226	0.681981	-0.167253
ENSMUSG00000087440	4930577N17Rik	TEC	18.9634	24.4694	17.6717	11.571	11.0833	10.0894	15.6414	0.115117	-1.84713	0.0647285	0.681981	0.212044
ENSMUSG00000055322	Tns1	protein_coding	11032.7	10829.2	10519.6	12551.9	12380.1	11544.5	11476.3	0.0831374	1.84638	0.0648373	0.682587	-0.153503
ENSMUSG00000032261	Sh3bgrl2	protein_coding	91.8228	96.8988	122.72	94.3483	70.5303	65.0208	90.2235	0.133216	-1.84548	0.064968	0.683423	0.246113
ENSMUSG00000020460	Rps27a	protein_coding	1245.6	1260.66	1343.05	1108.15	1062.99	1182.71	1200.53	0.0930092	-1.84459	0.0650976	0.683654	0.171566
ENSMUSG00000022463	Srebf2	protein_coding	195.623	291.675	273.912	308.857	314.364	317.256	283.614	0.11995	1.84392	0.0651955	0.683654	-0.221205
ENSMUSG00000022508	Bcl6	protein_coding	366.293	458.067	342.635	418.337	461.47	541.466	431.378	0.115687	1.84414	0.0651625	0.683654	-0.21333
ENSMUSG00000083563	Gm13340	unprocessed_pseudogene	878.305	542.242	538.987	821.542	646.864	1030.24	743.031	0.126774	1.84423	0.0651492	0.683654	-0.233755
ENSMUSG00000028926	Cdk14	protein_coding	71.8614	102.771	71.6686	113.93	106.803	106.5	95.589	0.132166	1.84287	0.0653476	0.68426	-0.243688
ENSMUSG00000030750	Nsmce1	protein_coding	291.438	277.972	355.398	251.002	256.932	253.357	281.016	0.115391	-1.84281	0.0653561	0.68426	0.212678
ENSMUSG00000026875	Traf1	protein_coding	21.9576	34.2571	23.5623	44.5039	37.2803	41.4788	33.84	0.131047	1.84148	0.0655511	0.685223	-0.241354
ENSMUSG00000045930	Clec14a	protein_coding	51.8999	51.8751	85.4133	45.394	44.3333	40.3577	53.2122	0.134152	-1.84159	0.0655352	0.685223	0.247151
ENSMUSG00000020063	Sirt1	protein_coding	317.388	344.529	359.325	273.254	275.068	304.925	312.415	0.111014	-1.83845	0.0659957	0.686098	0.204109
ENSMUSG00000033728	Lrrc14	protein_coding	53.896	50.8963	45.161	27.5924	41.3106	32.5104	41.8945	0.133408	-1.83941	0.0658551	0.686098	0.245339
ENSMUSG00000037295	Ldlrap1	protein_coding	142.725	141.922	107.012	180.686	172.295	145.736	148.396	0.127014	1.83976	0.0658037	0.686098	-0.233786
ENSMUSG00000038179	Slamf7	protein_coding	8.98267	23.4906	12.7629	22.252	23.1742	35.8735	21.0893	0.118559	1.839	0.0659153	0.686098	-0.216975
ENSMUSG00000039841	Zfp800	protein_coding	101.804	131.156	128.611	142.413	176.326	144.615	137.487	0.127649	1.84054	0.0656888	0.686098	-0.235011
ENSMUSG00000073633	Fbxo36	protein_coding	7.9846	4.89388	3.92705	8.01071	13.0985	17.9368	9.30858	0.0965602	1.83967	0.0658167	0.686098	-0.175158
ENSMUSG00000096780	Tmem181b-ps	transcribed_unprocessed_pseudogene	41.9191	39.151	29.4529	58.7452	70.5303	35.8735	45.9453	0.132773	1.8386	0.0659744	0.686098	-0.244213
ENSMUSG00000021367	Edn1	protein_coding	83.8382	89.0686	69.7051	47.1742	61.4621	68.3839	69.9387	0.134244	-1.83611	0.0663412	0.687107	0.246406
ENSMUSG00000022094	Slc39a14	protein_coding	1556	1202.92	1174.19	1560.31	1538.57	1516.78	1424.79	0.103352	1.83371	0.0666963	0.687107	-0.18952
ENSMUSG00000022215	Fitm1	protein_coding	267.484	318.102	207.152	184.246	207.561	238.783	237.221	0.124765	-1.8338	0.0666835	0.687107	0.22877
ENSMUSG00000022442	Ttll1	protein_coding	328.366	327.89	359.325	259.013	280.106	308.288	310.498	0.111822	-1.83308	0.0667913	0.687107	0.204981
ENSMUSG00000024232	Bambi	protein_coding	224.567	154.647	132.538	121.051	102.773	161.431	149.501	0.132422	-1.83427	0.0666139	0.687107	0.242796
ENSMUSG00000025785	Exosc7	protein_coding	109.788	99.8351	87.3768	76.5467	76.5758	70.626	86.7914	0.132066	-1.83291	0.0668157	0.687107	0.242223
ENSMUSG00000029231	Pdgfra	protein_coding	451.13	557.902	507.571	781.489	636.788	460.751	565.938	0.121387	1.8353	0.0664612	0.687107	-0.222827
ENSMUSG00000032625	Thsd7a	protein_coding	93.819	132.135	127.629	158.434	151.136	143.494	134.441	0.127962	1.83302	0.0667992	0.687107	-0.234664
ENSMUSG00000032902	Slc16a1	protein_coding	3440.36	2901.09	3023.83	2635.52	2603.58	2912.48	2919.48	0.0937949	-1.83476	0.0665414	0.687107	0.17209
ENSMUSG00000033767	Tmem131l	protein_coding	200.613	217.288	191.444	251.892	233.758	256.72	225.286	0.11637	1.83635	0.0663066	0.687107	-0.213733
ENSMUSG00000036718	Micall2	protein_coding	35.9307	45.0237	35.3434	24.0321	23.1742	28.0262	31.9217	0.130751	-1.83363	0.066709	0.687107	0.239644
ENSMUSG00000039936	Pik3cd	protein_coding	65.8729	63.6204	49.0881	74.7666	71.5379	100.894	70.9634	0.134307	1.83461	0.066563	0.687107	-0.246343
ENSMUSG00000046280	She	protein_coding	122.763	207.5	173.772	152.203	121.917	107.621	147.629	0.131364	-1.8373	0.0661663	0.687107	0.24151
ENSMUSG00000070639	Lrrc8b	protein_coding	180.651	195.755	161.991	201.158	241.818	223.088	200.744	0.120371	1.83653	0.0662799	0.687107	-0.221089
ENSMUSG00000064354	mt-Co2	protein_coding	280.459	187.925	201.261	233.201	239.803	408.061	258.452	0.131146	1.83228	0.066909	0.687536	-0.240161
ENSMUSG00000027570	Col9a3	protein_coding	7.9846	10.7665	6.87233	9.79086	19.1439	23.542	13.0167	0.106592	1.83	0.0672501	0.690507	-0.193232
ENSMUSG00000028082	Sh3d19	protein_coding	107.792	118.432	103.085	144.193	159.197	118.831	125.255	0.128328	1.82847	0.067479	0.691789	-0.234772
ENSMUSG00000055675	Kbtbd11	protein_coding	31.9384	16.6392	26.5076	38.2734	42.3182	36.9946	32.1119	0.129811	1.82854	0.0674682	0.691789	-0.23723
ENSMUSG00000026701	Prdx6	protein_coding	1945.25	1553.32	1637.58	1474.86	1419.67	1534.71	1594.23	0.0983438	-1.8281	0.067534	0.69182	0.179784
ENSMUSG00000029304	Spp1	protein_coding	1.99615	10.7665	8.83586	14.2413	23.1742	10.0894	11.5172	0.0995257	1.82712	0.0676813	0.692796	-0.179812
ENSMUSG00000031441	Atp11a	protein_coding	1301.49	1260.66	1213.46	1364.49	1446.88	1505.57	1348.76	0.0915173	1.82606	0.0678413	0.6939	-0.167115
ENSMUSG00000035373	Ccl7	protein_coding	588.864	819.235	682.324	719.183	876.591	919.259	767.576	0.112596	1.82521	0.0679694	0.694144	-0.205503
ENSMUSG00000060969	Irx1	protein_coding	50.9018	43.0661	42.2158	36.4932	23.1742	30.2683	37.6866	0.132346	-1.82555	0.0679185	0.694144	0.241767
ENSMUSG00000026222	Sp100	protein_coding	383.261	630.331	585.13	490.433	1155.69	1119.93	727.462	0.120649	1.82446	0.0680827	0.694767	-0.218086
ENSMUSG00000054404	Slfn5	protein_coding	2615.95	3888.68	3813.16	3217.63	6261.08	6048.05	4307.43	0.132348	1.82375	0.0681905	0.695334	-0.240678
ENSMUSG00000002980	Bcam	protein_coding	1664.79	1887.08	1691.58	1519.36	1441.84	1613.19	1636.31	0.0933508	-1.81718	0.069189	0.69571	0.169637
ENSMUSG00000019891	Dcbld1	protein_coding	81.8421	82.2171	72.6504	74.7666	60.4545	21.2999	65.5384	0.132593	-1.81737	0.0691601	0.69571	0.241185
ENSMUSG00000019920	Lims1	protein_coding	1428.24	1359.52	1616.96	1334.23	1284.66	1196.16	1369.96	0.0965111	-1.81846	0.068994	0.69571	0.17551
ENSMUSG00000020889	Nr1d1	protein_coding	246.524	220.225	181.626	191.367	166.25	161.431	194.57	0.123049	-1.81595	0.0693775	0.69571	0.22354
ENSMUSG00000021070	Bdkrb2	protein_coding	4.99037	0.978776	7.85409	15.1313	8.06061	11.2105	8.03761	0.0898385	1.81613	0.0693503	0.69571	-0.160538
ENSMUSG00000021366	Hivep1	protein_coding	541.954	646.971	490.881	635.516	759.712	613.213	614.708	0.110934	1.82023	0.0687233	0.69571	-0.201936
ENSMUSG00000024308	Tapbp	protein_coding	537.962	679.27	629.309	572.32	865.508	818.365	683.789	0.117469	1.82119	0.0685773	0.69571	-0.213913
ENSMUSG00000024795	Kif20b	protein_coding	6.98652	18.5967	16.6899	8.90078	7.05303	2.2421	10.0782	0.0964358	-1.81703	0.0692127	0.69571	0.173612
ENSMUSG00000024913	Lrp5	protein_coding	483.068	493.303	435.902	647.977	571.295	469.719	516.877	0.111525	1.81986	0.0687796	0.69571	-0.203
ENSMUSG00000024966	Stip1	protein_coding	1518.07	1262.62	1096.63	989.767	976.341	1267.9	1185.22	0.112113	-1.81836	0.0690098	0.69571	0.203849
ENSMUSG00000025278	Flnb	protein_coding	1019.03	1288.07	1243.89	1267.47	1390.45	1501.08	1285	0.10274	1.82075	0.068645	0.69571	-0.187061
ENSMUSG00000028862	Map3k6	protein_coding	677.693	730.167	770.683	921.231	787.924	825.091	785.465	0.100374	1.81629	0.0693256	0.69571	-0.182322
ENSMUSG00000030399	Ckm	protein_coding	8385.82	8508.5	7941.47	6850.04	6843.45	8072.66	7766.99	0.0909777	-1.81836	0.0690093	0.69571	0.165429
ENSMUSG00000030683	Sez6l2	protein_coding	24.9519	42.0874	28.4711	17.8016	24.1818	15.6947	25.5314	0.125241	-1.82209	0.0684406	0.69571	0.227942
ENSMUSG00000032254	Kif23	protein_coding	5.98845	35.2359	20.617	10.6809	12.0909	6.72629	15.2232	0.103549	-1.82029	0.0687153	0.69571	0.18647
ENSMUSG00000032294	Pkm	protein_coding	8135.3	7971.15	7933.62	6939.94	6687.28	7634.33	7550.27	0.0861163	-1.82049	0.0686847	0.69571	0.156773
ENSMUSG00000032860	P2ry2	protein_coding	468.097	451.216	424.121	583.001	436.28	593.034	492.625	0.112216	1.81964	0.0688136	0.69571	-0.204202
ENSMUSG00000042121	Ssh1	protein_coding	200.613	187.925	202.243	277.704	182.371	283.625	222.414	0.125066	1.81666	0.0692694	0.69571	-0.227227
ENSMUSG00000047675	Rps8	protein_coding	1664.79	1700.13	1782.88	1401.87	1525.47	1580.68	1609.3	0.0913381	-1.82313	0.0682842	0.69571	0.16652
ENSMUSG00000052056	Zfp217	protein_coding	152.705	286.781	231.696	254.562	282.121	327.346	255.869	0.128599	1.82244	0.0683887	0.69571	-0.234332
ENSMUSG00000062694	Cav3	protein_coding	398.232	341.593	375.033	303.517	276.076	348.646	340.516	0.112913	-1.81687	0.0692364	0.69571	0.205153
ENSMUSG00000074896	Ifit3	protein_coding	282.455	752.678	745.157	525.146	1988.95	1681.57	995.994	0.0921641	1.81989	0.0687765	0.69571	-0.161362
ENSMUSG00000021250	Fos	protein_coding	3888.5	2607.46	1812.33	1883.41	1105.31	2032.46	2221.58	0.124619	-1.81456	0.0695919	0.697334	0.22458
ENSMUSG00000039242	B3galnt2	protein_coding	231.553	228.055	215.988	265.243	291.189	258.962	248.498	0.114337	1.81394	0.0696863	0.697754	-0.207436
ENSMUSG00000026360	Rgs2	protein_coding	615.812	450.237	498.735	374.723	351.644	536.982	471.355	0.12201	-1.81127	0.0700996	0.700035	0.220949
ENSMUSG00000038354	Ankrd35	protein_coding	20.9596	16.6392	11.7811	24.9222	29.2197	29.1472	22.1115	0.1233	1.81111	0.0701245	0.700035	-0.222859
ENSMUSG00000044037	Als2cl	protein_coding	119.769	108.644	121.738	117.49	75.5682	66.1418	101.559	0.133265	-1.81188	0.0700055	0.700035	0.241754
ENSMUSG00000061100	Retnla	protein_coding	6.98652	12.7241	12.7629	30.2627	10.0758	22.421	15.8721	0.109928	1.81125	0.070102	0.700035	-0.197993
ENSMUSG00000032288	Imp3	protein_coding	170.671	136.05	137.447	120.161	118.894	109.863	132.181	0.127072	-1.80984	0.0703202	0.700937	0.230085
ENSMUSG00000063281	Zfp35	protein_coding	70.8633	81.2384	73.6321	56.965	51.3864	57.1734	65.2098	0.134067	-1.81017	0.070269	0.700937	0.24284
ENSMUSG00000027540	Ptpn1	protein_coding	430.17	542.242	553.714	596.353	630.742	579.582	555.467	0.107658	1.80897	0.0704552	0.701757	-0.194764
ENSMUSG00000030762	Aqp8	protein_coding	40.921	19.5755	14.7264	33.823	43.3258	44.8419	32.8689	0.126675	1.80788	0.0706249	0.702396	-0.228347
ENSMUSG00000078866	Zfp970	protein_coding	595.85	437.513	484.009	559.859	728.477	551.555	559.544	0.115981	1.80789	0.0706241	0.702396	-0.209684
ENSMUSG00000035828	Pim3	protein_coding	1494.12	1472.08	1444.17	1776.6	1500.28	1793.68	1580.15	0.0951199	1.80596	0.0709248	0.704852	-0.171785
ENSMUSG00000024594	Prrc1	protein_coding	187.638	166.392	188.498	238.541	235.773	192.82	201.61	0.120469	1.80517	0.0710488	0.705031	-0.217549
ENSMUSG00000052738	Suclg1	protein_coding	3139.94	2822.79	2926.63	2447.72	2449.42	2863.16	2774.94	0.0934867	-1.80549	0.0709977	0.705031	0.168788
ENSMUSG00000061780	Cfd	protein_coding	3.9923	8.80898	15.7082	18.6916	12.0909	26.9051	14.3662	0.106287	1.80479	0.071107	0.705082	-0.19003
ENSMUSG00000040721	Zfhx2	protein_coding	92.8209	56.769	55.9604	95.2384	85.6439	99.7732	81.0343	0.134163	1.80345	0.0713173	0.706642	-0.241964
ENSMUSG00000035898	Uba6	protein_coding	142.725	165.413	157.082	192.257	199.5	182.731	173.285	0.121214	1.80275	0.0714268	0.707199	-0.218587
ENSMUSG00000020623	Map2k6	protein_coding	37.9268	50.8963	36.3252	20.4718	30.2273	31.3893	34.5395	0.130879	-1.80026	0.0718196	0.709839	0.235272
ENSMUSG00000023349	Clec4n	protein_coding	49.9037	43.0661	44.1793	79.217	63.4773	50.4471	55.0484	0.134506	1.79998	0.0718635	0.709839	-0.242384
ENSMUSG00000034024	Cct2	protein_coding	1363.37	1260.66	1343.05	1102.81	1164.76	1206.25	1240.15	0.0922094	-1.79981	0.0718913	0.709839	0.165959
ENSMUSG00000042978	Sbk1	protein_coding	605.831	652.843	597.893	525.146	537.038	538.103	576.142	0.0996679	-1.79971	0.0719067	0.709839	0.179383
ENSMUSG00000028883	Sema3a	protein_coding	26.948	21.5331	27.4893	35.6031	52.3939	30.2683	32.3726	0.129667	1.79914	0.0719962	0.710195	-0.233206
ENSMUSG00000040599	Mis12	protein_coding	99.8074	89.0686	90.3221	88.1178	54.4091	62.7787	80.7506	0.133829	-1.79854	0.0720909	0.710603	0.240957
ENSMUSG00000052557	Gan	protein_coding	176.659	179.116	164.936	284.825	188.417	184.973	196.488	0.126911	1.79799	0.0721789	0.710944	-0.22831
ENSMUSG00000034422	Parp14	protein_coding	1797.53	3324.9	3242.76	2669.35	5916.49	6213.97	3860.83	0.117554	1.79657	0.0724045	0.712638	-0.20886
ENSMUSG00000020387	Jade2	protein_coding	352.32	423.81	453.574	457.5	506.811	497.745	448.627	0.109538	1.7951	0.0726379	0.713433	-0.196639
ENSMUSG00000028214	Gem	protein_coding	172.667	265.248	291.583	242.101	479.606	432.724	313.988	0.128223	1.79505	0.0726461	0.713433	-0.229094
ENSMUSG00000066975	Cryba4	protein_coding	26.948	31.3208	22.5805	10.6809	22.1667	14.5736	21.3784	0.12131	-1.79508	0.0726414	0.713433	0.217038
ENSMUSG00000027016	Zfp385b	protein_coding	54.8941	44.0449	55.9604	29.3726	40.303	36.9946	43.5949	0.133724	-1.79451	0.0727323	0.713753	0.23989
ENSMUSG00000079499	6530402F18Rik	processed_transcript	27.9461	30.342	16.6899	45.394	34.2576	36.9946	31.9374	0.129521	1.7937	0.0728614	0.714493	-0.232307
ENSMUSG00000022853	Ehhadh	protein_coding	148.713	128.22	127.629	242.991	159.197	127.799	155.758	0.131946	1.79332	0.0729218	0.714559	-0.236782
ENSMUSG00000034485	Uaca	protein_coding	978.113	978.776	924.82	947.934	1142.59	1297.05	1044.88	0.105126	1.79278	0.0730079	0.714725	-0.188457
ENSMUSG00000053626	Tll1	protein_coding	9.98074	13.7029	9.81762	16.0214	14.1061	33.6314	16.21	0.111916	1.79254	0.0730462	0.714725	-0.199081
ENSMUSG00000048814	Lonrf2	protein_coding	38.9249	46.0025	40.2522	52.5146	70.5303	54.9313	50.526	0.134431	1.79186	0.0731547	0.714736	-0.240953
ENSMUSG00000059883	Irak4	protein_coding	29.9422	43.0661	40.2522	57.8551	70.5303	38.1156	46.6269	0.133144	1.79198	0.073136	0.714736	-0.238727
ENSMUSG00000026946	Nmi	protein_coding	103.8	140.944	140.392	104.139	217.636	199.546	151.076	0.13376	1.79127	0.0732497	0.714953	-0.239425
ENSMUSG00000072949	Acot1	protein_coding	82.8402	56.769	49.0881	105.029	65.4924	91.9259	75.1908	0.134569	1.79072	0.0733382	0.714953	-0.241017
ENSMUSG00000107075	Gm43068	TEC	3.9923	7.8302	3.92705	9.79086	15.1136	11.2105	8.64409	0.0954558	1.79103	0.0732881	0.714953	-0.169101
ENSMUSG00000018362	Kpna2	protein_coding	340.343	231.97	247.404	213.619	217.636	230.936	246.985	0.122244	-1.78817	0.0737488	0.718429	0.218603
ENSMUSG00000024030	Abcg1	protein_coding	39.923	105.708	74.6139	44.5039	49.3712	56.0524	61.6954	0.13312	-1.78714	0.0739148	0.718995	0.237619
ENSMUSG00000045954	Cavin2	protein_coding	731.589	676.334	753.993	678.24	605.553	569.492	669.2	0.102022	-1.78743	0.0738687	0.718995	0.182379
ENSMUSG00000000693	Loxl3	protein_coding	20.9596	31.3208	19.6352	35.6031	39.2955	36.9946	30.6348	0.129662	1.78625	0.0740589	0.719562	-0.231526
ENSMUSG00000021733	Slc4a7	protein_coding	323.376	350.402	402.522	445.929	383.886	455.145	393.544	0.111494	1.78611	0.0740813	0.719562	-0.199156
ENSMUSG00000028691	Prdx1	protein_coding	2657.87	2487.07	2676.28	2311.53	2241.86	2371.02	2457.6	0.0868442	-1.7851	0.0742458	0.720318	0.155027
ENSMUSG00000031465	Angpt2	protein_coding	64.8748	83.1959	70.6868	69.4261	36.2727	48.205	62.1102	0.134482	-1.78496	0.0742674	0.720318	0.240303
ENSMUSG00000021368	Tbc1d7	protein_coding	141.727	138.007	141.374	106.809	109.826	117.71	125.909	0.126235	-1.78328	0.0745401	0.721504	0.225172
ENSMUSG00000022534	Mefv	protein_coding	21.9576	15.6604	12.7629	27.5924	29.2197	26.9051	22.3497	0.123728	1.78349	0.0745072	0.721504	-0.220361
ENSMUSG00000026582	Sele	protein_coding	683.681	1321.35	1425.52	1108.15	2559.24	2645.67	1623.93	0.11315	1.78288	0.0746065	0.721504	-0.19891
ENSMUSG00000087413	Gm11266	antisense_RNA	22.9557	21.5331	21.5988	8.90078	20.1515	6.72629	16.9777	0.113852	-1.78305	0.0745776	0.721504	0.202102
ENSMUSG00000034653	Ythdc2	protein_coding	234.547	223.161	249.367	253.672	307.311	293.714	260.296	0.115439	1.78215	0.074724	0.721591	-0.205736
ENSMUSG00000039530	Tusc3	protein_coding	125.757	148.774	149.228	107.699	121.917	104.257	126.272	0.127389	-1.78248	0.0746705	0.721591	0.227166
ENSMUSG00000039488	Cntn5	protein_coding	47.9076	49.9176	65.778	82.7773	67.5076	73.9891	64.6462	0.134401	1.78158	0.0748174	0.721969	-0.239605
ENSMUSG00000036249	Rbm43	protein_coding	39.923	68.5143	45.161	43.6138	100.758	82.9575	63.4879	0.133039	1.78091	0.0749277	0.722051	-0.236521
ENSMUSG00000057113	Npm1	protein_coding	1684.75	1738.31	1999.85	1506.9	1510.36	1696.14	1689.38	0.0965887	-1.78053	0.0749887	0.722051	0.171979
ENSMUSG00000104693	Gm42941	sense_intronic	22.9557	6.85143	4.90881	23.142	20.1515	23.542	16.9253	0.109232	1.78064	0.0749706	0.722051	-0.192863
ENSMUSG00000020832	Eral1	protein_coding	150.709	168.349	186.535	124.611	138.038	142.373	151.769	0.124648	-1.7796	0.0751413	0.722378	0.221859
ENSMUSG00000038578	Susd1	protein_coding	24.9519	15.6604	13.7447	41.8337	25.1894	23.542	24.1537	0.122707	1.77976	0.0751153	0.722378	-0.218191
ENSMUSG00000047656	Trpt1	protein_coding	65.8729	57.7478	61.851	49.8444	37.2803	44.8419	52.9064	0.134557	-1.77933	0.0751855	0.722378	0.239612
ENSMUSG00000041144	Dnah7b	protein_coding	24.9519	14.6816	12.7629	35.6031	20.1515	32.5104	23.4436	0.122117	1.77847	0.0753261	0.722686	-0.216691
ENSMUSG00000060183	Cxcl11	polymorphic_pseudogene	9.98074	51.8751	46.1428	27.5924	155.167	158.068	74.8042	0.0719896	1.77851	0.0753209	0.722686	-0.11829
ENSMUSG00000032024	Clmp	protein_coding	24.9519	14.6816	27.4893	34.7131	32.2424	39.2367	28.8858	0.128117	1.77652	0.0756474	0.723161	-0.227351
ENSMUSG00000038777	Sema6c	protein_coding	16.9673	35.2359	28.4711	17.8016	11.0833	17.9368	21.2493	0.120111	-1.77669	0.0756197	0.723161	0.212835
ENSMUSG00000048332	Lhfp	protein_coding	280.459	292.654	315.146	348.911	410.083	309.409	326.11	0.114614	1.77714	0.0755451	0.723161	-0.20372
ENSMUSG00000052485	Tmem171	protein_coding	10.9788	15.6604	12.7629	28.4825	19.1439	21.2999	18.0547	0.118401	1.77743	0.0754978	0.723161	-0.210159
ENSMUSG00000058498	Rnf207	protein_coding	269.48	312.229	286.674	223.41	264.992	232.057	264.807	0.115206	-1.77762	0.0754663	0.723161	0.204821
ENSMUSG00000024608	Rps14	protein_coding	1548.01	1638.47	1713.17	1450.83	1442.85	1422.61	1535.99	0.0898123	-1.77576	0.0757726	0.723318	0.159489
ENSMUSG00000041037	Irgq	protein_coding	175.661	189.882	175.735	210.949	216.629	232.057	200.152	0.118146	1.77588	0.0757523	0.723318	-0.209838
ENSMUSG00000029798	Herc6	protein_coding	170.671	341.593	315.146	247.442	651.902	684.96	401.952	0.10898	1.77529	0.0758495	0.723533	-0.190176
ENSMUSG00000028884	Rpa2	protein_coding	84.8363	104.729	93.2674	70.3162	75.5682	68.3839	82.8502	0.132461	-1.77493	0.0759095	0.723588	0.235246
ENSMUSG00000028455	Stoml2	protein_coding	424.182	368.998	352.452	324.879	316.379	323.983	351.812	0.109826	-1.77377	0.0761007	0.724891	0.194828
ENSMUSG00000060012	Kif13b	protein_coding	229.557	235.885	196.352	300.847	238.795	265.688	244.521	0.118415	1.77327	0.0761836	0.725161	-0.210035
ENSMUSG00000026443	Lrrn2	protein_coding	9.98074	14.6816	1.96352	14.2413	29.2197	12.3315	13.7364	0.101356	1.7722	0.0763611	0.726331	-0.177446
ENSMUSG00000024672	Ms4a7	protein_coding	9.98074	18.5967	13.7447	28.4825	19.1439	25.7841	19.2888	0.119289	1.77138	0.0764977	0.726911	-0.210901
ENSMUSG00000030605	Mfge8	protein_coding	789.477	844.683	802.099	715.623	674.068	729.802	759.292	0.0963962	-1.77118	0.0765313	0.726911	0.170742
ENSMUSG00000109635	Gm45670	antisense_RNA	239.538	237.842	191.444	194.037	164.235	184.973	202.011	0.121188	-1.76989	0.076746	0.72843	0.214548
ENSMUSG00000074994	Qser1	protein_coding	746.56	803.575	781.482	881.178	884.652	903.564	833.502	0.0944304	1.76761	0.0771262	0.731517	-0.166921
ENSMUSG00000011831	Evi5	protein_coding	262.494	322.017	372.088	283.045	276.076	217.483	288.867	0.121157	-1.76687	0.0772499	0.731979	0.214141
ENSMUSG00000028568	Btf3l4	protein_coding	211.592	186.946	247.404	178.906	162.22	182.731	194.966	0.121886	-1.76601	0.0773949	0.731979	0.215295
ENSMUSG00000045005	Fzd5	protein_coding	84.8363	105.708	103.085	80.1071	151.136	169.278	115.692	0.134188	1.76635	0.0773373	0.731979	-0.236795
ENSMUSG00000109754	Gm39214	lincRNA	80.844	103.75	100.14	75.6567	64.4849	75.1102	83.3309	0.132763	-1.76602	0.0773925	0.731979	0.23459
ENSMUSG00000029422	Rsrc2	protein_coding	746.56	670.461	791.3	677.35	626.712	593.034	684.236	0.102058	-1.76462	0.0776273	0.733494	0.180112
ENSMUSG00000056753	C330011M18Rik	antisense_RNA	10.9788	15.6604	10.7994	16.9115	26.197	23.542	17.3482	0.117015	1.7644	0.0776654	0.733494	-0.205715
ENSMUSG00000022180	Slc7a8	protein_coding	31.9384	28.3845	21.5988	56.965	42.3182	26.9051	34.685	0.12927	1.76254	0.0779781	0.734534	-0.227975
ENSMUSG00000027399	Il1a	protein_coding	10.9788	44.0449	13.7447	36.4932	32.2424	49.3261	31.1384	0.120211	1.76243	0.0779963	0.734534	-0.210758
ENSMUSG00000040964	Arhgef10l	protein_coding	315.392	331.805	319.073	359.592	376.833	404.698	351.232	0.108014	1.76285	0.0779261	0.734534	-0.190417
ENSMUSG00000055546	Timd4	protein_coding	13.973	20.5543	13.7447	29.3726	25.1894	25.7841	21.4363	0.122995	1.76329	0.077852	0.734534	-0.216691
ENSMUSG00000034674	Tdg	protein_coding	90.8248	79.2808	80.5045	114.82	111.841	97.5311	95.8004	0.130852	1.76209	0.0780539	0.734557	-0.230715
ENSMUSG00000016477	E2f3	protein_coding	160.69	140.944	102.103	173.565	156.174	183.852	152.888	0.128266	1.76038	0.0783441	0.735208	-0.225817
ENSMUSG00000020961	Ston2	protein_coding	49.9037	58.7265	54.9787	55.1849	86.6515	85.1996	65.1075	0.134551	1.76073	0.0782841	0.735208	-0.236793
ENSMUSG00000043487	Acot6	protein_coding	19.9615	17.618	17.6717	26.7024	33.25	29.1472	24.0585	0.126082	1.76048	0.0783257	0.735208	-0.221759
ENSMUSG00000044365	Cxxc4	protein_coding	22.9557	18.5967	14.7264	12.4611	12.0909	4.48419	14.2192	0.109644	-1.76076	0.0782783	0.735208	0.192505
ENSMUSG00000064368	mt-Nd6	protein_coding	78507.5	62772.8	86276.2	87618.4	82159.7	94859.7	82032.4	0.102173	1.75943	0.0785039	0.736188	-0.179765
ENSMUSG00000020372	Rack1	protein_coding	1985.17	2348.08	2315.98	1854.92	1927.49	2034.7	2077.72	0.0941904	-1.75834	0.0786897	0.736374	0.165619
ENSMUSG00000020656	Grhl1	protein_coding	16.9673	6.85143	6.87233	19.5817	17.1288	21.2999	14.7836	0.110486	1.75898	0.0785801	0.736374	-0.193191
ENSMUSG00000021728	Emb	protein_coding	15.9692	16.6392	12.7629	34.7131	16.1212	26.9051	20.5184	0.119754	1.75835	0.0786881	0.736374	-0.210196
ENSMUSG00000000753	Serpinf1	protein_coding	110.786	130.177	139.41	142.413	204.538	140.131	144.576	0.129349	1.75717	0.0788893	0.737205	-0.227335
ENSMUSG00000003153	Slc2a3	protein_coding	47.9076	75.3657	81.4862	85.4475	101.765	89.6838	80.276	0.134056	1.75728	0.07887	0.737205	-0.23563
ENSMUSG00000021748	Pdhb	protein_coding	6107.22	5819.8	6111.47	5112.61	5093.3	5774.52	5669.82	0.0875961	-1.75669	0.078971	0.73745	0.153878
ENSMUSG00000024660	Incenp	protein_coding	13.973	48.9388	31.4164	24.0321	20.1515	7.84733	24.3932	0.115314	-1.75533	0.0792033	0.739101	0.201713
ENSMUSG00000044338	Aplnr	protein_coding	41.9191	89.0686	34.3617	29.3726	48.3636	28.0262	45.1853	0.128436	-1.75361	0.0794968	0.739765	0.224758
ENSMUSG00000052681	Rap1b	protein_coding	1228.63	1436.84	1463.81	1567.43	1503.3	1671.48	1478.58	0.0964666	1.75371	0.0794811	0.739765	-0.169175
ENSMUSG00000070942	Il1rl2	protein_coding	71.8614	67.5355	83.4497	57.8551	64.4849	38.1156	63.8837	0.134562	-1.75414	0.0794062	0.739765	0.23629
ENSMUSG00000074221	Zfp568	protein_coding	421.187	299.505	282.747	278.595	197.485	318.377	299.649	0.127345	-1.75435	0.07937	0.739765	0.223382
ENSMUSG00000003948	Mmd	protein_coding	146.717	152.689	115.848	94.3483	121.917	108.742	123.377	0.129348	-1.75309	0.079587	0.740087	0.226781
ENSMUSG00000006920	Ezh1	protein_coding	407.214	367.041	397.613	365.822	317.386	303.804	359.814	0.110231	-1.75111	0.0799278	0.740957	0.193072
ENSMUSG00000034116	Vav1	protein_coding	53.896	75.3657	45.161	87.2277	79.5985	71.747	68.8327	0.134472	1.75197	0.0797787	0.740957	-0.235739
ENSMUSG00000038383	Pigu	protein_coding	214.586	233.927	203.225	182.466	181.364	171.52	197.848	0.118716	-1.75179	0.0798098	0.740957	0.208028
ENSMUSG00000042700	Sipa1l1	protein_coding	154.702	190.861	167.881	202.048	213.606	212.999	190.349	0.120292	1.75153	0.0798546	0.740957	-0.21073
ENSMUSG00000054027	Nt5dc3	protein_coding	656.733	563.775	553.714	657.768	656.939	760.07	641.5	0.104616	1.75092	0.079959	0.740957	-0.18317
ENSMUSG00000022505	Emp2	protein_coding	355.314	363.126	358.343	292.836	305.295	316.135	331.842	0.108069	-1.75029	0.0800676	0.741447	0.189167
ENSMUSG00000020169	Best3	protein_coding	87.8305	57.7478	48.1063	115.71	78.5909	73.9891	76.9958	0.134564	1.74652	0.0807207	0.742233	-0.235139
ENSMUSG00000020522	Mfap3	protein_coding	185.642	148.774	142.355	145.973	117.886	110.984	141.936	0.128019	-1.7477	0.0805152	0.742233	0.223879
ENSMUSG00000020955	Ap4s1	protein_coding	477.08	441.428	487.936	356.921	381.871	452.903	433.023	0.109409	-1.7453	0.0809329	0.742233	0.19094
ENSMUSG00000025404	R3hdm2	protein_coding	1572.97	1616.94	1465.77	1757.9	1717.92	1795.92	1654.57	0.0895706	1.74691	0.0806521	0.742233	-0.156473
ENSMUSG00000029009	Mthfr	protein_coding	87.8305	90.0474	88.3586	136.182	108.818	98.6522	101.648	0.131021	1.74753	0.0805447	0.742233	-0.229153
ENSMUSG00000029330	Cds1	protein_coding	64.8748	56.769	63.8145	74.7666	74.5606	100.894	72.6133	0.133939	1.74679	0.0806733	0.742233	-0.233924
ENSMUSG00000031197	Vbp1	protein_coding	411.207	476.664	515.425	388.964	405.045	396.851	432.359	0.108154	-1.74878	0.0803292	0.742233	0.189153
ENSMUSG00000031551	Ido1	protein_coding	9.98074	19.5755	16.6899	15.1313	33.25	32.5104	21.1897	0.118399	1.74556	0.0808874	0.742233	-0.205614
ENSMUSG00000032724	Abtb2	protein_coding	293.434	312.229	269.984	330.219	318.394	402.456	321.119	0.114302	1.74663	0.080702	0.742233	-0.199636
ENSMUSG00000034312	Iqsec1	protein_coding	705.639	685.143	551.75	757.457	733.515	779.128	702.105	0.104661	1.74834	0.0804057	0.742233	-0.182987
ENSMUSG00000039191	Rbpj	protein_coding	303.415	339.635	301.401	435.248	359.705	334.072	345.579	0.114011	1.74558	0.0808832	0.742233	-0.199068
ENSMUSG00000044206	Vsig4	protein_coding	3.9923	4.89388	4.90881	15.1313	8.06061	8.96838	7.65922	0.0918959	1.74646	0.0807311	0.742233	-0.158898
ENSMUSG00000056429	Tgoln1	protein_coding	1523.06	1340.92	1473.62	1611.93	1629.25	1688.3	1544.51	0.0914965	1.74646	0.0807316	0.742233	-0.159795
ENSMUSG00000071226	Cecr2	protein_coding	246.524	312.229	267.039	367.602	297.235	329.588	303.37	0.116065	1.7453	0.0809334	0.742233	-0.202608
ENSMUSG00000032044	Rpusd4	protein_coding	110.786	123.326	120.757	86.3376	111.841	75.1102	104.693	0.131211	-1.74466	0.0810446	0.742742	0.229042
ENSMUSG00000020642	Rnf144a	protein_coding	90.8248	148.774	64.7963	163.774	154.159	100.894	120.537	0.134562	1.74359	0.0812311	0.743939	-0.234649
ENSMUSG00000006715	Gmnn	protein_coding	367.291	282.866	269.003	237.651	270.03	248.873	279.286	0.118722	-1.74091	0.0816989	0.744125	0.206699
ENSMUSG00000018287	Spag7	protein_coding	546.945	581.393	611.638	442.369	498.75	547.071	538.028	0.105719	-1.74131	0.0816287	0.744125	0.184084
ENSMUSG00000024188	Luc7l	protein_coding	347.33	340.614	384.851	332.889	299.25	265.688	328.437	0.112737	-1.7429	0.0813511	0.744125	0.196546
ENSMUSG00000025872	Thoc3	protein_coding	148.713	127.241	120.757	92.5682	116.879	102.015	118.029	0.129038	-1.74182	0.0815393	0.744125	0.224803
ENSMUSG00000031813	Mvb12a	protein_coding	95.8151	85.1535	102.103	78.3269	69.5227	67.2629	83.0307	0.132459	-1.74204	0.0815021	0.744125	0.230929
ENSMUSG00000032402	Smad3	protein_coding	154.702	201.628	194.389	224.3	243.833	207.394	204.374	0.121322	1.74249	0.0814221	0.744125	-0.211458
ENSMUSG00000040435	Ppp1r15a	protein_coding	653.739	582.371	658.762	381.844	518.902	652.45	574.678	0.120333	-1.74196	0.0815151	0.744125	0.209568
ENSMUSG00000079184	Mphosph8	protein_coding	361.303	299.505	335.763	288.385	289.174	256.72	305.142	0.112951	-1.74108	0.0816695	0.744125	0.196698
ENSMUSG00000102252	Snrpn	protein_coding	112.782	139.965	123.702	145.973	150.129	177.126	141.613	0.126305	1.74012	0.0818373	0.744876	-0.219798
ENSMUSG00000023905	Tnfrsf12a	protein_coding	878.305	794.766	710.795	657.768	461.47	820.607	720.619	0.121959	-1.73969	0.0819135	0.74506	0.212147
ENSMUSG00000073988	Ttpa	protein_coding	12.975	3.9151	2.94529	14.2413	16.1212	12.3315	10.4216	0.0977988	1.7393	0.0819816	0.74517	-0.168143
ENSMUSG00000024750	Zfand5	protein_coding	1573.96	1593.45	1786.81	2088.12	1746.13	1847.49	1772.66	0.0966022	1.73881	0.0820674	0.745441	-0.167978
ENSMUSG00000013936	Myl2	protein_coding	74750.8	65824.6	73509.4	57436.8	61240.5	69437.7	67033.3	0.0927035	-1.73587	0.0825873	0.746776	0.16092
ENSMUSG00000024411	Aqp4	protein_coding	32.9365	36.2147	61.851	25.8123	34.2576	25.7841	36.1427	0.130105	-1.737	0.0823864	0.746776	0.225823
ENSMUSG00000044864	Ankrd50	protein_coding	351.322	322.996	368.161	450.38	381.871	397.972	378.784	0.109395	1.73729	0.0823363	0.746776	-0.19008
ENSMUSG00000054520	Sh3bp2	protein_coding	63.8768	74.3869	46.1428	84.5575	73.553	91.9259	72.4071	0.134276	1.73625	0.0825196	0.746776	-0.23317
ENSMUSG00000054808	Actn4	protein_coding	765.523	935.709	840.388	805.521	673.061	699.534	786.623	0.104275	-1.73575	0.0826073	0.746776	0.181014
ENSMUSG00000084819	Gm11967	antisense_RNA	13.973	11.7453	7.85409	26.7024	14.1061	20.1789	15.76	0.113183	1.73606	0.0825541	0.746776	-0.195857
ENSMUSG00000090841	Myl6	protein_coding	822.413	966.052	861.005	742.325	782.886	776.886	825.261	0.0983951	-1.73659	0.0824597	0.746776	0.170876
ENSMUSG00000037580	Gch1	protein_coding	174.663	261.333	316.127	241.211	351.644	373.309	286.381	0.130002	1.73526	0.0826945	0.746796	-0.225518
ENSMUSG00000053964	Lgals4	protein_coding	169.673	103.75	127.629	231.42	143.076	150.22	154.295	0.132543	1.73511	0.0827217	0.746796	-0.23007
ENSMUSG00000036570	Fxyd1	protein_coding	1663.79	1435.86	1434.35	1187.36	1305.82	1439.43	1411.1	0.0994114	-1.73473	0.082788	0.746888	0.172448
ENSMUSG00000027580	Helz2	protein_coding	814.429	1514.17	1642.49	1453.5	2465.54	2372.14	1710.38	0.126657	1.7344	0.0828466	0.746911	-0.218524
ENSMUSG00000031736	Crnde	processed_transcript	26.948	35.2359	40.2522	16.9115	26.197	22.421	27.9943	0.127722	-1.73381	0.0829513	0.747348	0.221106
ENSMUSG00000028086	Fbxw7	protein_coding	353.318	328.869	464.373	340.9	313.356	292.593	348.902	0.117686	-1.73274	0.0831419	0.748273	0.203962
ENSMUSG00000032434	Cmtm6	protein_coding	263.492	373.892	409.395	433.468	424.189	412.545	386.164	0.118602	1.7326	0.0831664	0.748273	-0.205513
ENSMUSG00000015850	Adamtsl4	protein_coding	333.357	410.107	366.197	312.418	327.462	294.835	340.729	0.111413	-1.73022	0.0835916	0.749611	0.1928
ENSMUSG00000016262	Sertad4	protein_coding	13.973	18.5967	17.6717	25.8123	28.2121	28.0262	22.0487	0.124191	1.73107	0.0834399	0.749611	-0.214755
ENSMUSG00000030214	Plbd1	protein_coding	501.033	389.553	367.179	481.532	490.689	524.65	459.106	0.112332	1.73019	0.0835968	0.749611	-0.194355
ENSMUSG00000038729	Akap2	protein_coding	5.98845	6.85143	2.94529	9.79086	13.0985	12.3315	8.50101	0.0953027	1.7308	0.0834879	0.749611	-0.163207
ENSMUSG00000044522	A730020M07Rik	lincRNA	15.9692	6.85143	11.7811	17.8016	22.1667	22.421	16.1652	0.114358	1.73093	0.0834641	0.749611	-0.197059
ENSMUSG00000017146	Brca1	protein_coding	6.98652	13.7029	13.7447	8.90078	3.02273	2.2421	8.09994	0.0903507	-1.72908	0.0837941	0.749716	0.154728
ENSMUSG00000028414	Fktn	protein_coding	319.384	298.527	362.27	396.975	333.508	446.177	359.473	0.115176	1.72886	0.0838339	0.749716	-0.199124
ENSMUSG00000032523	Hhatl	protein_coding	749.554	810.426	748.102	679.13	523.939	748.86	710.002	0.110278	-1.72896	0.0838164	0.749716	0.190666
ENSMUSG00000036427	Gpi1	protein_coding	3174.87	3104.68	2905.03	2674.69	2672.09	2817.19	2891.43	0.0867468	-1.7298	0.0836659	0.749716	0.150055
ENSMUSG00000021767	Kat6b	protein_coding	433.164	386.616	414.303	503.784	449.379	487.656	445.817	0.105167	1.72845	0.0839082	0.749877	-0.181791
ENSMUSG00000018501	Ncor1	protein_coding	1674.77	1585.62	1628.74	1905.66	1777.36	1831.79	1733.99	0.0883803	1.72596	0.0843539	0.750046	-0.152544
ENSMUSG00000021876	Rnase4	protein_coding	274.47	336.699	301.401	375.613	373.811	334.072	332.678	0.111958	1.72646	0.0842644	0.750046	-0.193327
ENSMUSG00000028684	Urod	protein_coding	361.303	327.89	321.036	289.275	279.098	285.867	310.745	0.110164	-1.7264	0.0842758	0.750046	0.190213
ENSMUSG00000029561	Oasl2	protein_coding	347.33	604.883	447.683	448.6	893.72	875.538	602.959	0.126479	1.72624	0.0843039	0.750046	-0.217193
ENSMUSG00000034707	Gns	protein_coding	919.227	933.752	885.549	1043.17	1020.67	1048.18	975.092	0.092309	1.72583	0.0843781	0.750046	-0.159313
ENSMUSG00000039105	Atp6v1g1	protein_coding	699.65	612.714	644.036	529.597	579.356	581.824	607.863	0.101384	-1.72691	0.0841839	0.750046	0.175083
ENSMUSG00000053390	Zfp952	protein_coding	47.9076	54.8114	49.0881	61.4154	77.5833	68.3839	59.865	0.13447	1.72731	0.0841119	0.750046	-0.232331
ENSMUSG00000078920	Ifi47	protein_coding	246.524	488.409	459.464	399.645	809.083	799.307	533.739	0.120616	1.72752	0.0840751	0.750046	-0.206644
ENSMUSG00000002504	Slc9a3r2	protein_coding	384.259	428.704	292.565	380.954	283.129	202.91	328.753	0.129032	-1.72416	0.0846784	0.750741	0.222559
ENSMUSG00000025220	Mgea5	protein_coding	1273.54	1208.79	1252.73	1427.69	1435.8	1360.95	1326.58	0.0899498	1.7243	0.0846537	0.750741	-0.155104
ENSMUSG00000044442	N6amt1	protein_coding	246.524	243.715	252.313	222.52	192.447	201.789	226.551	0.116126	-1.7248	0.0845629	0.750741	0.200354
ENSMUSG00000044707	Ccnjl	protein_coding	3.9923	4.89388	4.90881	11.571	11.0833	8.96838	7.56962	0.0926509	1.72414	0.084682	0.750741	-0.158243
ENSMUSG00000010066	Cacna2d2	protein_coding	20.9596	29.3633	13.7447	26.7024	59.447	21.2999	28.5861	0.120926	1.7225	0.0849795	0.751612	-0.207541
ENSMUSG00000025241	Fyco1	protein_coding	4617.09	4256.7	4491.56	4761.03	5005.64	5250.99	4730.5	0.086247	1.72173	0.085119	0.751612	-0.148493
ENSMUSG00000037287	Tbcel	protein_coding	172.667	187.925	179.662	219.849	223.682	209.636	198.904	0.117959	1.72206	0.0850584	0.751612	-0.203181
ENSMUSG00000038594	Cep85l	protein_coding	263.492	269.163	271.948	248.332	228.72	187.215	244.812	0.117636	-1.72234	0.0850073	0.751612	0.202694
ENSMUSG00000039952	Dag1	protein_coding	3366.5	3541.21	3404.75	3883.41	3751.2	3906.85	3642.32	0.0839623	1.72304	0.0848809	0.751612	-0.144671
ENSMUSG00000070327	Rnf213	protein_coding	1845.44	3075.31	2703.77	2242.11	5168.86	5523.4	3426.48	0.119469	1.72199	0.0850712	0.751612	-0.203874
ENSMUSG00000040943	Tet2	protein_coding	661.723	490.367	516.407	642.637	669.03	653.571	605.622	0.108937	1.72095	0.0852603	0.75236	-0.187478
ENSMUSG00000024986	Hhex	protein_coding	8.98267	13.7029	15.7082	1.78016	8.06061	7.84733	9.34697	0.0952427	-1.71994	0.0854436	0.752979	0.161103
ENSMUSG00000026383	Epb41l5	protein_coding	79.846	76.3445	41.234	102.359	87.6591	79.5944	77.8395	0.134538	1.72018	0.0853997	0.752979	-0.231517
ENSMUSG00000047749	Zc3hav1l	protein_coding	17.9653	22.5118	30.4346	35.6031	34.2576	39.2367	30.0015	0.129271	1.71889	0.0856353	0.754168	-0.222087
ENSMUSG00000032280	Tle3	protein_coding	232.551	256.439	264.094	335.56	275.068	290.351	275.677	0.115021	1.71845	0.085714	0.754363	-0.197707
ENSMUSG00000002831	Plin4	protein_coding	3481.28	2776.79	3088.62	3818.44	3405.61	3471.88	3340.44	0.0964829	1.71267	0.0867734	0.754774	-0.165245
ENSMUSG00000003190	Bcl2l12	protein_coding	17.9653	24.4694	11.7811	10.6809	8.06061	10.0894	13.8411	0.109773	-1.71766	0.0858582	0.754774	0.187659
ENSMUSG00000005936	Kctd20	protein_coding	341.341	362.147	430.012	336.45	309.326	308.288	347.927	0.112212	-1.71288	0.0867349	0.754774	0.19224
ENSMUSG00000019659	Ccdc12	protein_coding	191.63	193.798	217.951	144.193	166.25	182.731	182.759	0.122026	-1.71577	0.0862046	0.754774	0.209362
ENSMUSG00000020790	Ankfy1	protein_coding	339.345	473.727	398.595	401.425	533.008	532.498	446.433	0.118139	1.71422	0.0864879	0.754774	-0.2025
ENSMUSG00000023206	Il15ra	protein_coding	213.588	177.158	166.899	185.136	275.068	234.299	208.692	0.12527	1.71426	0.0864815	0.754774	-0.214723
ENSMUSG00000025268	Maged2	protein_coding	121.765	124.305	132.538	105.029	93.7045	100.894	113.039	0.128163	-1.71271	0.0867652	0.754774	0.219613
ENSMUSG00000025408	Ddit3	protein_coding	327.368	191.84	183.589	76.5467	93.7045	209.636	180.448	0.110006	-1.71276	0.0867564	0.754774	0.185551
ENSMUSG00000026791	Slc2a8	protein_coding	85.8344	92.0049	93.2674	64.9757	68.5152	73.9891	79.7644	0.132549	-1.71684	0.0860083	0.754774	0.227632
ENSMUSG00000028136	Snx27	protein_coding	249.519	294.611	277.839	343.57	321.417	310.53	299.581	0.112196	1.71564	0.086228	0.754774	-0.192525
ENSMUSG00000029167	Ppargc1a	protein_coding	2146.86	1605.19	2041.08	2773.48	1712.88	2532.45	2135.32	0.118786	1.71418	0.0864948	0.754774	-0.203616
ENSMUSG00000030498	Gas2	protein_coding	30.9403	31.3208	36.3252	16.9115	23.1742	23.542	27.0357	0.127993	-1.71433	0.0864675	0.754774	0.219103
ENSMUSG00000031698	Mylk3	protein_coding	6401.65	5838.4	6400.1	5256.8	5688.77	5653.44	5873.19	0.0863848	-1.71199	0.0868993	0.754774	0.147889
ENSMUSG00000032006	Pdgfd	protein_coding	215.584	253.503	266.057	307.077	303.28	270.172	269.279	0.115538	1.7117	0.0869519	0.754774	-0.197812
ENSMUSG00000033419	Snap91	protein_coding	78.8479	114.517	86.395	53.4047	83.6288	71.747	81.4234	0.134174	-1.71193	0.0869087	0.754774	0.229632
ENSMUSG00000034595	Ppp1r18	protein_coding	265.488	376.829	316.127	360.482	396.985	393.488	351.566	0.115804	1.71384	0.0865582	0.754774	-0.198478
ENSMUSG00000035274	Tpbg	protein_coding	8.98267	13.7029	11.7811	19.5817	17.1288	24.663	15.9734	0.115203	1.71234	0.0868346	0.754774	-0.196585
ENSMUSG00000035673	Sbno2	protein_coding	1365.37	1592.47	1719.06	1781.94	1614.14	2044.79	1686.29	0.103842	1.71612	0.0861406	0.754774	-0.178203
ENSMUSG00000036144	Meox2	protein_coding	36.9288	43.0661	52.0334	32.0428	34.2576	22.421	36.7916	0.131869	-1.71255	0.0867961	0.754774	0.226022
ENSMUSG00000043943	Naalad2	protein_coding	121.765	135.071	160.027	178.906	154.159	186.094	156.004	0.125492	1.71197	0.0869029	0.754774	-0.214882
ENSMUSG00000055254	Ntrk2	protein_coding	9.98074	12.7241	11.7811	18.6916	23.1742	19.0578	15.9016	0.115786	1.71413	0.0865053	0.754774	-0.197967
ENSMUSG00000078816	Prkcg	protein_coding	73.8575	61.6629	63.8145	86.3376	71.5379	108.742	77.6587	0.133867	1.71093	0.0870936	0.755512	-0.229007
ENSMUSG00000050855	Zfp940	protein_coding	12.975	17.618	11.7811	6.23055	9.06818	5.60524	10.5463	0.102538	-1.71022	0.0872248	0.756157	0.174192
ENSMUSG00000025647	Shisa5	protein_coding	301.418	379.765	335.763	339.12	431.242	452.903	373.369	0.116189	1.70938	0.0873808	0.756523	-0.198595
ENSMUSG00000040666	Sh3bgr	protein_coding	1608.9	1398.67	1339.12	1183.8	1222.19	1374.4	1354.51	0.0990574	-1.70947	0.0873634	0.756523	0.169333
ENSMUSG00000019124	Scrn1	protein_coding	32.9365	31.3208	26.5076	27.5924	58.4394	51.5682	38.0608	0.130512	1.70897	0.0874567	0.756688	-0.222593
ENSMUSG00000030616	Sytl2	protein_coding	6.98652	7.8302	5.89057	8.01071	19.1439	15.6947	10.5928	0.100983	1.70864	0.0875181	0.756728	-0.170867
ENSMUSG00000001506	Col1a1	protein_coding	303.415	383.68	301.401	435.248	446.356	317.256	364.559	0.119647	1.70744	0.0877396	0.757167	-0.204339
ENSMUSG00000002379	Ndufa11	protein_coding	1321.45	1355.6	1293.96	1083.23	1127.48	1273.51	1242.54	0.0948715	-1.70745	0.0877388	0.757167	0.161985
ENSMUSG00000067297	Ifit1bl2	protein_coding	59.8845	47.96	51.0516	59.6353	89.6742	68.3839	62.7649	0.134553	1.70764	0.0877023	0.757167	-0.22976
ENSMUSG00000006057	Atp5g1	protein_coding	5607.18	5636.77	5330.97	4805.53	4650.97	5286.86	5219.71	0.0872661	-1.70629	0.0879533	0.757607	0.148901
ENSMUSG00000017417	Plxdc1	protein_coding	7.9846	12.7241	16.6899	19.5817	31.2348	15.6947	17.3183	0.114568	1.70594	0.0880184	0.757607	-0.194776
ENSMUSG00000048772	Tmem53	protein_coding	69.8652	57.7478	53.9969	40.9436	49.3712	40.3577	52.0471	0.134515	-1.70602	0.0880039	0.757607	0.229572
ENSMUSG00000049588	Ccdc69	protein_coding	40.921	29.3633	31.4164	35.6031	54.4091	59.4155	41.8547	0.13259	1.70678	0.0878631	0.757607	-0.225997
ENSMUSG00000000326	Comt	protein_coding	1223.64	732.124	713.741	1148.2	1006.57	1119.93	990.7	0.122468	1.70364	0.0884485	0.759345	-0.20863
ENSMUSG00000031841	Cdh13	protein_coding	1662.79	1601.28	1745.57	1453.5	1499.27	1488.75	1575.19	0.0891766	-1.70395	0.0883908	0.759345	0.151954
ENSMUSG00000050891	Tatdn1	protein_coding	121.765	96.8988	118.793	89.0078	79.5985	94.168	100.039	0.130831	-1.70375	0.0884269	0.759345	0.222971
ENSMUSG00000058997	Vwa8	protein_coding	3508.23	2413.66	2304.19	3293.29	2980.41	3520.09	3003.31	0.113508	1.70391	0.0883979	0.759345	-0.193402
ENSMUSG00000030707	Coro1a	protein_coding	42.9172	66.5567	50.0698	83.6674	79.5985	56.0524	63.1437	0.134567	1.70282	0.0886012	0.759886	-0.229348
ENSMUSG00000036777	Anln	protein_coding	8.98267	37.1935	31.4164	12.4611	19.1439	11.2105	20.068	0.112528	-1.70269	0.0886257	0.759886	0.190416
ENSMUSG00000000538	Tom1l2	protein_coding	1168.75	1067.84	1031.83	1257.68	1255.44	1201.76	1163.88	0.0934562	1.70212	0.0887336	0.760245	-0.159077
ENSMUSG00000018965	Ywhah	protein_coding	459.114	557.902	548.805	434.358	407.061	491.019	483.043	0.109089	-1.70125	0.0888962	0.760245	0.18559
ENSMUSG00000027602	Map1lc3a	protein_coding	2134.88	2184.63	2072.5	1708.95	1817.67	2086.27	2000.82	0.0946225	-1.70159	0.0888323	0.760245	0.161006
ENSMUSG00000034394	Lif	protein_coding	58.8864	115.496	148.246	130.842	120.909	192.82	127.866	0.134574	1.70137	0.0888732	0.760245	-0.228761
ENSMUSG00000027189	Trim44	protein_coding	500.035	556.923	535.06	623.055	659.962	561.645	572.78	0.103045	1.69972	0.0891832	0.761121	-0.175163
ENSMUSG00000044408	Sptssa	protein_coding	154.702	223.161	226.787	165.555	179.348	136.768	181.053	0.127221	-1.69918	0.0892846	0.761121	0.216257
ENSMUSG00000048852	Gm12185	protein_coding	33.9345	97.8776	83.4497	56.0749	231.742	214.12	119.533	0.0885684	1.69928	0.0892672	0.761121	-0.144884
ENSMUSG00000050640	Tmem150c	protein_coding	59.8845	86.1323	59.8875	102.359	77.5833	94.168	80.0024	0.13388	1.69953	0.0892197	0.761121	-0.227641
ENSMUSG00000068245	Phf11d	protein_coding	223.569	396.404	355.398	295.506	671.045	672.629	435.758	0.119784	1.69945	0.0892339	0.761121	-0.201846
ENSMUSG00000021779	Thrb	protein_coding	286.447	274.057	300.419	213.619	271.038	234.299	263.313	0.115914	-1.69859	0.0893964	0.76132	0.196904
ENSMUSG00000083899	Gm12346	transcribed_processed_pseudogene	40.921	30.342	20.617	20.4718	15.1136	21.2999	24.7942	0.124193	-1.69845	0.0894224	0.76132	0.21055
ENSMUSG00000028312	Smc2	protein_coding	35.9307	67.5355	64.7963	45.394	41.3106	28.0262	47.1655	0.13259	-1.69764	0.0895759	0.761652	0.225267
ENSMUSG00000052397	Ezr	protein_coding	510.016	559.86	599.856	462.841	472.553	503.35	518.079	0.103898	-1.69787	0.0895329	0.761652	0.17641
ENSMUSG00000022237	Ankrd33b	protein_coding	691.666	903.41	808.972	920.341	878.606	997.732	866.788	0.10457	1.69612	0.0898631	0.762069	-0.177364
ENSMUSG00000026181	Ppm1f	protein_coding	269.48	349.423	298.456	266.133	266	230.936	280.071	0.116683	-1.69586	0.0899126	0.762069	0.19793
ENSMUSG00000028902	Sf3a3	protein_coding	147.715	145.838	140.392	128.171	117.886	99.7732	129.963	0.126865	-1.69664	0.0897642	0.762069	0.215389
ENSMUSG00000039168	Dap	protein_coding	69.8652	75.3657	70.6868	83.6674	102.773	95.289	82.9412	0.132412	1.69566	0.0899498	0.762069	-0.224573
ENSMUSG00000039328	Rnf122	protein_coding	131.746	176.18	134.501	180.686	159.197	214.12	166.072	0.126777	1.69556	0.0899684	0.762069	-0.21496
ENSMUSG00000056999	Ide	protein_coding	2049.05	1604.21	2581.05	1489.1	2076.61	1578.43	1896.41	0.119418	-1.6968	0.0897351	0.762069	0.202619
ENSMUSG00000030064	Frmd4b	protein_coding	271.476	293.633	242.495	292.836	332.5	337.435	295.063	0.113889	1.69519	0.0900385	0.762177	-0.193066
ENSMUSG00000029710	Ephb4	protein_coding	311.399	396.404	405.468	369.383	302.273	232.057	336.164	0.123129	-1.69417	0.0902326	0.763334	0.208685
ENSMUSG00000030433	Sbk2	protein_coding	29.9422	36.2147	34.3617	45.394	51.3864	47.084	40.7305	0.133592	1.69254	0.0905422	0.76513	-0.226176
ENSMUSG00000034349	Smc4	protein_coding	221.573	252.524	291.583	232.31	201.515	196.183	232.615	0.119916	-1.69245	0.0905598	0.76513	0.203023
ENSMUSG00000001687	Ubl3	protein_coding	721.608	772.254	721.595	788.61	827.22	932.712	794	0.0994263	1.6914	0.0907612	0.766344	-0.168165
ENSMUSG00000022350	Washc5	protein_coding	454.124	410.107	409.395	357.812	365.75	368.825	394.335	0.105971	-1.69063	0.0909081	0.766612	0.179169
ENSMUSG00000079139	Gm4204	processed_pseudogene	21.9576	28.3845	38.2887	38.2734	49.3712	43.7209	36.666	0.131615	1.69065	0.0909044	0.766612	-0.222425
ENSMUSG00000009585	Apobec3	protein_coding	379.268	413.043	376.015	441.479	479.606	439.451	421.477	0.105389	1.69027	0.090976	0.766699	-0.178149
ENSMUSG00000020611	Gna13	protein_coding	711.627	911.24	956.236	909.66	986.417	1141.23	936.068	0.10973	1.68989	0.0910493	0.76679	-0.185425
ENSMUSG00000029204	Rhoh	protein_coding	4.99037	9.78776	3.92705	9.79086	15.1136	14.5736	9.69722	0.0984171	1.68961	0.091102	0.76679	-0.164669
ENSMUSG00000024772	Ehd1	protein_coding	997.076	1099.16	939.546	1115.27	1215.14	1136.74	1083.82	0.0963128	1.68887	0.0912437	0.767497	-0.162662
ENSMUSG00000071014	Ndufb6	protein_coding	568.902	498.197	496.771	404.986	454.417	480.929	484.034	0.106742	-1.6885	0.0913148	0.76761	0.180229
ENSMUSG00000023972	Ptk7	protein_coding	20.9596	23.4906	25.5258	16.9115	13.0985	11.2105	18.5327	0.119627	-1.68758	0.0914924	0.768617	0.201806
ENSMUSG00000008035	Mid1ip1	protein_coding	1468.17	1520.04	1246.84	1041.39	1086.17	1462.97	1304.26	0.111013	-1.68685	0.091633	0.768828	0.187249
ENSMUSG00000106149	Gm43430	TEC	18.9634	16.6392	7.85409	19.5817	38.2879	17.9368	19.8772	0.115804	1.68691	0.0916204	0.768828	-0.194496
ENSMUSG00000073647	Gm10557	pseudogene	4.99037	23.4906	15.7082	29.3726	21.1591	26.9051	20.271	0.115452	1.68631	0.0917367	0.769213	-0.193913
ENSMUSG00000032462	Pik3cb	protein_coding	186.64	180.095	238.568	177.126	154.159	160.31	182.816	0.123607	-1.68546	0.0919002	0.769547	0.208406
ENSMUSG00000034560	Washc4	protein_coding	326.37	357.253	370.124	356.031	474.568	421.514	384.31	0.113117	1.6852	0.09195	0.769547	-0.190622
ENSMUSG00000049939	Lrrc4	protein_coding	7.9846	7.8302	1.96352	16.9115	10.0758	11.2105	9.32934	0.0957666	1.68558	0.0918769	0.769547	-0.159867
ENSMUSG00000021322	Aoah	protein_coding	21.9576	36.2147	18.6535	37.3833	42.3182	36.9946	32.2536	0.129464	1.6832	0.0923372	0.771893	-0.217809
ENSMUSG00000035161	Ints6	protein_coding	260.497	235.885	305.328	206.498	212.598	245.509	244.386	0.118936	-1.68315	0.0923464	0.771893	0.200186
ENSMUSG00000079293	Clec7a	polymorphic_pseudogene	17.9653	23.4906	17.6717	25.8123	38.2879	29.1472	25.3958	0.126234	1.68282	0.0924107	0.771946	-0.212195
ENSMUSG00000008540	Mgst1	protein_coding	539.958	322.996	318.091	516.246	457.439	484.293	439.837	0.124721	1.67931	0.093091	0.77326	-0.209443
ENSMUSG00000013974	Mcemp1	protein_coding	10.9788	9.78776	5.89057	15.1313	19.1439	15.6947	12.7712	0.108519	1.67949	0.0930563	0.77326	-0.181382
ENSMUSG00000021290	2010107E04Rik	protein_coding	1857.42	1671.75	1719.06	1451.72	1532.52	1647.94	1646.74	0.0927269	-1.67997	0.0929624	0.77326	0.155777
ENSMUSG00000021994	Wnt5a	protein_coding	64.8748	43.0661	53.9969	90.788	74.5606	56.0524	63.8898	0.134565	1.68142	0.0926817	0.77326	-0.226461
ENSMUSG00000026532	Spta1	protein_coding	256.505	145.838	201.261	155.764	169.273	152.462	180.184	0.128971	-1.68081	0.0927995	0.77326	0.216796
ENSMUSG00000042793	Lgr6	protein_coding	289.442	298.527	333.799	221.63	293.205	254.478	281.846	0.116828	-1.68081	0.0927994	0.77326	0.196371
ENSMUSG00000047648	Fbxo30	protein_coding	645.754	627.395	626.364	619.495	420.159	561.645	583.469	0.112901	-1.67941	0.0930716	0.77326	0.189627
ENSMUSG00000053205	Styx	protein_coding	58.8864	57.7478	64.7963	67.646	86.6515	87.4417	70.5283	0.133906	1.67944	0.0930662	0.77326	-0.224877
ENSMUSG00000061878	Sphk1	protein_coding	228.559	273.078	249.367	312.418	251.894	341.919	276.206	0.118444	1.68025	0.0929094	0.77326	-0.199025
ENSMUSG00000028030	Tbck	protein_coding	168.675	174.222	162.972	203.828	213.606	193.941	186.207	0.119301	1.67878	0.0931944	0.773636	-0.20033
ENSMUSG00000070699	Sars2	protein_coding	68.8671	76.3445	64.7963	56.0749	51.3864	48.205	60.9457	0.134375	-1.67836	0.0932767	0.773836	0.225724
ENSMUSG00000026672	Optn	protein_coding	1015.04	845.662	947.4	1136.63	1025.71	1054.91	1004.23	0.0985601	1.67745	0.0934548	0.774416	-0.165336
ENSMUSG00000040174	Alkbh3	protein_coding	173.665	175.201	149.228	134.402	140.053	130.042	150.432	0.123986	-1.67741	0.093463	0.774416	0.208042
ENSMUSG00000033644	Piwil2	protein_coding	7.9846	12.7241	14.7264	19.5817	22.1667	20.1789	16.2271	0.115624	1.67672	0.0935971	0.774562	-0.193357
ENSMUSG00000047511	Olfr1396	protein_coding	36.9288	36.2147	20.617	20.4718	74.5606	54.9313	40.6207	0.124861	1.67687	0.0935672	0.774562	-0.208414
ENSMUSG00000032271	Nnmt	protein_coding	31.9384	35.2359	40.2522	28.4825	17.1288	24.663	29.6168	0.128983	-1.67547	0.0938428	0.776114	0.216148
ENSMUSG00000028018	Gstcd	protein_coding	20.9596	20.5543	18.6535	34.7131	28.2121	30.2683	25.5601	0.12735	1.6738	0.0941707	0.778342	-0.213156
ENSMUSG00000040624	Plekhg1	protein_coding	300.42	336.699	468.3	492.213	423.182	423.756	407.428	0.120196	1.67343	0.0942425	0.778451	-0.201167
ENSMUSG00000016756	Cmah	protein_coding	26.948	20.5543	13.7447	49.8444	21.1591	28.0262	26.7128	0.122515	1.67233	0.0944599	0.779323	-0.204657
ENSMUSG00000031382	Asb11	protein_coding	1261.57	962.136	1140.81	1321.77	1254.43	1300.42	1206.85	0.101396	1.67196	0.0945318	0.779323	-0.169532
ENSMUSG00000043993	2900052L18Rik	processed_transcript	16.9673	12.7241	14.7264	8.90078	9.06818	4.48419	11.1452	0.104158	-1.67186	0.0945514	0.779323	0.173434
ENSMUSG00000074743	Thbd	protein_coding	1569.97	1530.81	1666.05	2462.85	1247.38	2154.65	1771.95	0.124111	1.67171	0.0945822	0.779323	-0.207465
ENSMUSG00000000531	Grasp	protein_coding	64.8748	69.4931	91.3038	52.5146	62.4697	52.6892	65.5576	0.13441	-1.67128	0.0946668	0.779537	0.224721
ENSMUSG00000023068	Nus1	protein_coding	1104.87	1110.91	1370.54	1098.36	892.712	1089.66	1111.17	0.106005	-1.67088	0.0947455	0.779702	0.177126
ENSMUSG00000027550	Lrrcc1	protein_coding	102.802	97.8776	107.012	116.6	148.114	123.315	115.953	0.12879	1.6704	0.0948394	0.779992	-0.215177
ENSMUSG00000106121	Gm42679	sense_intronic	51.8999	43.0661	41.234	60.5253	47.3561	82.9575	54.5065	0.134271	1.66976	0.094966	0.780551	-0.224055
ENSMUSG00000030691	Fchsd2	protein_coding	289.442	278.951	299.437	316.868	380.864	327.346	315.485	0.111901	1.6669	0.0955338	0.781358	-0.18654
ENSMUSG00000038252	Ncapd2	protein_coding	106.794	134.092	108.976	85.4475	99.75	89.6838	104.124	0.130417	-1.66702	0.0955106	0.781358	0.217474
ENSMUSG00000048707	Tprn	protein_coding	14.9711	14.6816	8.83586	26.7024	15.1136	24.663	17.4946	0.1162	1.66812	0.0952927	0.781358	-0.193303
ENSMUSG00000059213	Ddn	protein_coding	8.98267	6.85143	6.87233	15.1313	13.0985	15.6947	11.1052	0.105037	1.66741	0.095432	0.781358	-0.174212
ENSMUSG00000070780	Rbm47	protein_coding	19.9615	24.4694	25.5258	44.5039	30.2273	31.3893	29.3462	0.128851	1.66737	0.0954416	0.781358	-0.214971
ENSMUSG00000074063	Osgin1	protein_coding	46.9095	27.4057	22.5805	14.2413	18.1364	28.0262	26.2166	0.123033	-1.66736	0.095443	0.781358	0.204168
ENSMUSG00000075705	Msrb1	protein_coding	899.265	740.933	692.142	601.693	654.924	736.528	720.914	0.108606	-1.6683	0.095257	0.781358	0.181178
ENSMUSG00000078532	Nkain1	protein_coding	56.8902	46.0025	38.2887	87.2277	54.4091	54.9313	56.2916	0.134196	1.66878	0.0951619	0.781358	-0.224136
ENSMUSG00000002814	Top3a	protein_coding	35.9307	27.4057	19.6352	37.3833	49.3712	36.9946	34.4535	0.130498	1.66503	0.0959075	0.78201	-0.217165
ENSMUSG00000022553	Maf1	protein_coding	439.153	465.897	482.045	398.755	399	400.214	430.844	0.103896	-1.66529	0.0958552	0.78201	0.173032
ENSMUSG00000036611	Eepd1	protein_coding	86.8325	126.262	111.921	138.852	123.932	149.099	122.816	0.129592	1.66526	0.0958602	0.78201	-0.215848
ENSMUSG00000055639	Dach1	protein_coding	90.8248	160.519	142.355	91.6781	99.75	112.105	116.205	0.132657	-1.66571	0.0957709	0.78201	0.220946
ENSMUSG00000059089	Fcgr4	protein_coding	21.9576	13.7029	8.83586	27.5924	28.2121	19.0578	19.8931	0.118487	1.66561	0.0957912	0.78201	-0.196927
ENSMUSG00000039997	Ifi203	protein_coding	1011.05	2329.49	2056.79	2054.3	3318.95	3348.57	2353.19	0.122754	1.66414	0.0960853	0.78298	-0.202917
ENSMUSG00000003346	Abhd17a	protein_coding	112.782	140.944	122.72	102.359	103.78	91.9259	112.419	0.129094	-1.66345	0.0962214	0.783131	0.214858
ENSMUSG00000030161	Gabarapl1	protein_coding	1073.93	1252.83	1301.82	1221.19	769.788	1048.18	1111.29	0.115785	-1.66368	0.0961769	0.783131	0.192638
ENSMUSG00000000732	Icosl	protein_coding	260.497	275.036	258.203	314.198	331.492	290.351	288.296	0.111762	1.66291	0.0963308	0.78322	-0.18588
ENSMUSG00000031979	Cog2	protein_coding	185.642	189.882	187.516	170.895	146.098	144.615	170.775	0.121707	-1.66205	0.0965025	0.78322	0.202376
ENSMUSG00000038005	Hpf1	protein_coding	188.636	183.031	174.754	146.863	147.106	155.826	166.036	0.121324	-1.66236	0.0964412	0.78322	0.201722
ENSMUSG00000045671	Spred2	protein_coding	209.596	330.826	309.255	315.088	396.985	329.588	315.223	0.123381	1.66231	0.0964513	0.78322	-0.205106
ENSMUSG00000059734	Ndufs8	protein_coding	1538.03	1423.14	1452.03	1182.02	1240.33	1445.03	1380.1	0.0973243	-1.66193	0.0965267	0.78322	0.161743
ENSMUSG00000037266	Rsrp1	protein_coding	1250.59	1849.89	2053.85	1562.09	1562.75	1107.59	1564.46	0.12178	-1.66078	0.0967567	0.78413	0.202253
ENSMUSG00000045104	Gm5514	processed_pseudogene	23.9538	32.2996	31.4164	20.4718	17.1288	17.9368	23.8679	0.125624	-1.66083	0.0967481	0.78413	0.208596
ENSMUSG00000027981	Rnpc3	protein_coding	139.73	147.795	155.118	123.721	130.985	99.7732	132.854	0.127008	-1.66013	0.0968883	0.784719	0.210973
ENSMUSG00000030007	Cct7	protein_coding	1155.77	1134.4	1128.04	953.274	1023.7	1045.94	1073.52	0.0925105	-1.65979	0.0969575	0.784801	0.153547
ENSMUSG00000019802	Sec63	protein_coding	745.562	641.098	712.759	807.301	814.121	780.249	750.182	0.0984796	1.65939	0.097037	0.78495	-0.163422
ENSMUSG00000033379	Atp6v0b	protein_coding	243.53	313.208	263.112	234.091	215.621	234.299	250.644	0.117358	-1.65911	0.0970938	0.78495	0.194743
ENSMUSG00000021134	Srsf5	protein_coding	1924.29	1230.32	1644.45	2044.51	1875.1	1755.56	1745.7	0.112832	1.65872	0.0971723	0.785107	-0.187158
ENSMUSG00000022488	Nckap1l	protein_coding	77.8498	108.644	62.8327	105.919	116.879	103.136	95.8769	0.133185	1.65739	0.09744	0.786316	-0.220794
ENSMUSG00000026429	Ube2t	protein_coding	37.9268	33.2784	25.5258	23.142	14.1061	24.663	26.4404	0.126252	-1.65743	0.0974316	0.786316	0.209002
ENSMUSG00000009828	Ick	protein_coding	138.732	151.71	185.553	138.852	134.008	106.5	142.559	0.127927	-1.65674	0.0975728	0.78691	0.212068
ENSMUSG00000099974	Bcl2a1d	protein_coding	5.98845	19.5755	11.7811	16.9115	28.2121	21.2999	17.2948	0.113209	1.65637	0.0976475	0.787035	-0.18661
ENSMUSG00000016554	Eif3d	protein_coding	181.65	209.458	190.462	162.884	141.061	173.762	176.546	0.122149	-1.65521	0.0978809	0.787962	0.202219
ENSMUSG00000031779	Ccl22	protein_coding	5.98845	6.85143	0.981762	14.2413	11.0833	6.72629	7.64542	0.0884088	1.65544	0.0978349	0.787962	-0.144414
ENSMUSG00000033938	Ndufb7	protein_coding	1591.93	1396.71	1320.47	1168.67	1175.84	1402.43	1342.68	0.101409	-1.65374	0.0981797	0.789889	0.167699
ENSMUSG00000052726	Kcnt2	protein_coding	50.9018	64.5992	55.9604	73.8765	84.6364	69.5049	66.5799	0.134151	1.65334	0.0982619	0.790073	-0.221913
ENSMUSG00000014303	Glis2	protein_coding	49.9037	50.8963	32.3981	35.6031	34.2576	19.0578	37.0195	0.130568	-1.65184	0.0985681	0.791631	0.215868
ENSMUSG00000020333	Acsl6	protein_coding	98.8094	110.602	125.665	144.193	117.886	160.31	126.244	0.129044	1.6518	0.0985746	0.791631	-0.213183
ENSMUSG00000034209	Rasl10a	protein_coding	27.9461	16.6392	12.7629	28.4825	31.2348	31.3893	24.7425	0.124469	1.65111	0.0987168	0.792132	-0.205132
ENSMUSG00000051615	Rap2a	protein_coding	121.765	139.965	142.355	110.37	102.773	110.984	121.369	0.127396	-1.65091	0.0987561	0.792132	0.210396
ENSMUSG00000009092	Derl3	protein_coding	23.9538	4.89388	11.7811	8.01071	0	8.96838	9.60131	0.0859568	-1.64898	0.0991508	0.793171	0.138322
ENSMUSG00000018412	Kansl1	protein_coding	381.264	458.067	427.066	399.645	362.727	307.167	389.323	0.112945	-1.64882	0.0991836	0.793171	0.186275
ENSMUSG00000022864	D16Ertd472e	protein_coding	35.9307	69.4931	64.7963	57.8551	97.7349	81.8365	67.9411	0.134275	1.64908	0.0991321	0.793171	-0.221275
ENSMUSG00000024927	Rela	protein_coding	450.132	594.117	535.06	518.916	702.28	654.692	575.866	0.114313	1.64964	0.0990173	0.793171	-0.188566
ENSMUSG00000031740	Mmp2	protein_coding	215.584	363.126	308.273	411.216	376.833	304.925	329.993	0.125275	1.64955	0.0990348	0.793171	-0.206695
ENSMUSG00000001228	Uhrf1	protein_coding	18.9634	29.3633	16.6899	12.4611	12.0909	13.4526	17.1702	0.116559	-1.6478	0.0993936	0.793477	0.191499
ENSMUSG00000020074	Ccar1	protein_coding	989.092	850.556	946.418	746.776	816.136	868.812	869.632	0.0999565	-1.6466	0.0996393	0.793477	0.164585
ENSMUSG00000028601	Echdc2	protein_coding	160.69	155.625	165.918	186.026	182.371	217.483	178.019	0.121254	1.64684	0.0995912	0.793477	-0.199692
ENSMUSG00000031955	Bcar1	protein_coding	181.65	216.309	218.933	231.42	248.871	260.083	226.211	0.117747	1.64765	0.0994237	0.793477	-0.194018
ENSMUSG00000034761	Map4k5	protein_coding	410.209	446.322	477.136	542.058	524.947	478.687	479.893	0.105332	1.64669	0.0996214	0.793477	-0.17347
ENSMUSG00000064280	Ccdc146	protein_coding	110.786	62.6416	82.468	102.359	111.841	119.952	98.3413	0.133161	1.64695	0.099568	0.793477	-0.219279
ENSMUSG00000087263	Gm15726	antisense_RNA	10.9788	45.0237	56.9422	1.78016	8.06061	23.542	24.3879	0.0640099	-1.64705	0.0995475	0.793477	0.0962159
ENSMUSG00000020469	Myl7	protein_coding	0.998074	0	40.2522	15.1313	241.818	161.431	76.6051	0.0352021	1.64552	0.0998628	0.793536	-0.0417008
ENSMUSG00000021037	Ahsa1	protein_coding	824.409	602.926	596.911	545.618	574.318	597.518	623.617	0.112128	-1.64454	0.100064	0.793536	0.184397
ENSMUSG00000027469	Tpx2	protein_coding	10.9788	32.2996	30.4346	16.0214	16.1212	10.0894	19.3242	0.11493	-1.64478	0.100016	0.793536	0.188484
ENSMUSG00000035208	Slfn8	protein_coding	174.663	408.149	352.452	298.176	726.462	659.176	436.513	0.11047	1.64534	0.0999006	0.793536	-0.179289
ENSMUSG00000038305	Spats2l	protein_coding	40.921	60.6841	49.0881	48.9543	75.5682	85.1996	60.0692	0.134376	1.64626	0.09971	0.793536	-0.221007
ENSMUSG00000051586	Mical3	protein_coding	1005.06	848.598	747.121	1033.38	989.439	986.522	935.02	0.104474	1.64509	0.0999519	0.793536	-0.171873
ENSMUSG00000069910	Spdl1	protein_coding	5.98845	15.6604	11.7811	3.56031	7.05303	4.48419	8.08792	0.0919224	-1.64495	0.099981	0.793536	0.149254
ENSMUSG00000025384	Faap100	protein_coding	57.8883	58.7265	53.9969	37.3833	44.3333	42.5998	49.1547	0.134489	-1.64329	0.100323	0.794271	0.221037
ENSMUSG00000043192	Gm1840	processed_pseudogene	19.9615	17.618	18.6535	11.571	13.0985	6.72629	14.6048	0.112635	-1.64366	0.100246	0.794271	0.184784
ENSMUSG00000045464	2810002D19Rik	processed_transcript	26.948	37.1935	16.6899	43.6138	39.2955	38.1156	33.6427	0.129679	1.64323	0.100336	0.794271	-0.213037
ENSMUSG00000020848	Doc2b	protein_coding	12.975	12.7241	8.83586	14.2413	30.2273	16.8157	15.9699	0.112743	1.64214	0.100562	0.795585	-0.184289
ENSMUSG00000047810	Ccdc88b	protein_coding	25.9499	23.4906	10.7994	29.3726	34.2576	31.3893	25.8766	0.124898	1.64072	0.100856	0.79744	-0.204574
ENSMUSG00000074521	Gm14327	protein_coding	112.782	60.6841	63.8145	92.5682	119.902	104.257	92.3347	0.134336	1.63938	0.101133	0.799157	-0.220159
ENSMUSG00000037622	Wdtc1	protein_coding	586.868	631.31	545.86	679.13	670.038	671.507	630.785	0.0998766	1.63898	0.101217	0.799346	-0.163703
ENSMUSG00000041801	Phlda3	protein_coding	25.9499	35.2359	28.4711	21.3619	18.1364	17.9368	24.5153	0.126167	-1.63794	0.101434	0.800582	0.206654
ENSMUSG00000021930	Spryd7	protein_coding	427.176	459.046	504.626	358.702	433.258	399.093	430.317	0.108988	-1.63672	0.101688	0.801639	0.178386
ENSMUSG00000027956	Tmem144	protein_coding	680.687	558.881	577.276	569.65	490.689	501.108	563.049	0.106773	-1.63678	0.101675	0.801639	0.174784
ENSMUSG00000005580	Adcy9	protein_coding	250.517	224.14	198.316	272.364	267.008	262.325	245.778	0.116335	1.63489	0.102071	0.802144	-0.190223
ENSMUSG00000021451	Sema4d	protein_coding	189.634	203.585	194.389	218.959	272.045	216.362	215.829	0.11946	1.63513	0.102021	0.802144	-0.195363
ENSMUSG00000021943	Gdf10	protein_coding	8.98267	13.7029	8.83586	2.67024	6.04545	5.60524	7.64039	0.091471	-1.63516	0.102015	0.802144	0.147483
ENSMUSG00000022607	Ptk2	protein_coding	341.341	415.98	431.975	350.691	311.341	347.525	366.475	0.11222	-1.63469	0.102114	0.802144	0.183466
ENSMUSG00000022973	Synj1	protein_coding	279.461	307.336	335.763	372.943	373.811	336.314	334.271	0.111099	1.63537	0.101972	0.802144	-0.181717
ENSMUSG00000036822	Topors	protein_coding	200.613	237.842	253.295	181.576	203.53	189.457	211.052	0.119651	-1.63597	0.101845	0.802144	0.195776
ENSMUSG00000025779	Ly96	protein_coding	15.9692	21.5331	10.7994	25.8123	30.2273	22.421	21.127	0.121534	1.63383	0.102295	0.803093	-0.198298
ENSMUSG00000063382	Bcl9l	protein_coding	213.588	155.625	129.593	231.42	224.689	169.278	187.366	0.129177	1.63203	0.102674	0.80559	-0.210883
ENSMUSG00000000740	Rpl13	protein_coding	1223.64	1268.49	1295.93	1117.94	1062.99	1177.1	1191.01	0.09226	-1.63107	0.102875	0.806696	0.150484
ENSMUSG00000017446	C1qtnf1	protein_coding	69.8652	92.9837	97.1944	73.8765	72.5455	48.205	75.7784	0.134281	-1.63067	0.102959	0.806878	0.219198
ENSMUSG00000030681	Mvp	protein_coding	600.841	568.669	601.82	680.91	655.932	682.718	631.815	0.0978626	1.63034	0.10303	0.806961	-0.159554
ENSMUSG00000037872	Ackr1	protein_coding	10.9788	4.89388	4.90881	10.6809	14.1061	16.8157	10.3974	0.100533	1.6288	0.103355	0.808802	-0.162248
ENSMUSG00000043631	Ecm2	protein_coding	174.663	210.437	221.878	249.222	294.212	198.425	224.806	0.124042	1.62865	0.103387	0.808802	-0.202079
ENSMUSG00000024401	Tnf	protein_coding	47.9076	99.8351	34.3617	59.6353	182.371	126.678	91.7982	0.0979895	1.62836	0.103448	0.808807	-0.155922
ENSMUSG00000038014	Fam120a	protein_coding	1448.21	1493.61	1399.99	1682.25	1551.67	1642.33	1536.34	0.0898628	1.62654	0.103835	0.81135	-0.146168
ENSMUSG00000028760	Eif4g3	protein_coding	550.937	681.228	620.473	709.393	685.152	738.77	664.325	0.102761	1.62615	0.103919	0.811529	-0.167108
ENSMUSG00000087445	Gm14286	antisense_RNA	5.98845	3.9151	4.90881	10.6809	9.06818	12.3315	7.8155	0.0934392	1.62554	0.104047	0.812052	-0.150434
ENSMUSG00000028538	St3gal3	protein_coding	433.164	439.47	437.866	482.423	528.977	496.624	469.754	0.102566	1.62391	0.104396	0.812394	-0.166564
ENSMUSG00000031461	Myom2	protein_coding	14836.4	13125.4	16416	12071.2	13852.2	13210.4	13918.6	0.0952932	-1.62442	0.104287	0.812394	0.154795
ENSMUSG00000031824	6430548M08Rik	protein_coding	139.73	139.965	150.21	123.721	108.818	115.468	129.652	0.126044	-1.62502	0.104159	0.812394	0.204912
ENSMUSG00000039994	Timeless	protein_coding	226.563	352.359	408.413	307.967	472.553	460.751	371.434	0.129228	1.62399	0.104377	0.812394	-0.209813
ENSMUSG00000079508	Apoo	protein_coding	791.473	772.254	770.683	626.615	660.97	753.344	729.223	0.100219	-1.62415	0.104344	0.812394	0.162766
ENSMUSG00000032182	Yipf2	protein_coding	14.9711	21.5331	8.83586	24.9222	25.1894	24.663	20.0191	0.119729	1.62353	0.104476	0.812544	-0.193982
ENSMUSG00000022546	Gpt	protein_coding	216.582	226.097	244.459	195.817	196.477	182.731	210.361	0.117419	-1.62228	0.104743	0.812722	0.190537
ENSMUSG00000033149	Phldb2	protein_coding	258.501	356.274	214.024	183.356	245.848	238.783	249.465	0.127501	-1.62283	0.104627	0.812722	0.206877
ENSMUSG00000033849	B3galt2	protein_coding	95.8151	113.538	154.137	61.4154	106.803	107.621	106.555	0.134184	-1.62237	0.104724	0.812722	0.217511
ENSMUSG00000079562	Maea	protein_coding	481.072	519.73	505.607	453.05	419.152	436.087	469.116	0.1029	-1.6223	0.104738	0.812722	0.166952
ENSMUSG00000002565	Scin	protein_coding	38.9249	57.7478	49.0881	23.142	37.2803	41.4788	41.277	0.132249	-1.62074	0.105073	0.814808	0.213984
ENSMUSG00000020528	Prpsap2	protein_coding	27.9461	40.1298	15.7082	54.2948	42.3182	30.2683	35.1109	0.12774	1.6194	0.105362	0.816572	-0.206834
ENSMUSG00000030980	Knop1	protein_coding	216.582	218.267	213.042	203.828	166.25	167.036	197.501	0.119993	-1.61758	0.105754	0.816977	0.194179
ENSMUSG00000031807	Pgls	protein_coding	146.717	160.519	148.246	121.051	103.78	143.494	137.301	0.127069	-1.61731	0.105811	0.816977	0.205519
ENSMUSG00000031904	Slc7a6	protein_coding	150.709	172.265	170.827	198.487	213.606	183.852	181.624	0.120938	1.61734	0.105804	0.816977	-0.19565
ENSMUSG00000031917	Nip7	protein_coding	182.648	165.413	157.082	137.072	124.939	151.341	153.083	0.124272	-1.61801	0.105661	0.816977	0.201099
ENSMUSG00000032596	Uba7	protein_coding	160.69	167.371	137.447	159.324	224.689	189.457	173.163	0.125563	1.61808	0.105646	0.816977	-0.203166
ENSMUSG00000034377	Tulp4	protein_coding	622.798	730.167	649.926	713.843	827.22	760.07	717.337	0.10199	1.6181	0.105642	0.816977	-0.165031
ENSMUSG00000055839	Elob	protein_coding	570.899	556.923	509.534	443.259	460.462	515.682	509.46	0.104549	-1.61716	0.105844	0.816977	0.169069
ENSMUSG00000002983	Relb	protein_coding	239.538	295.59	244.459	270.584	343.583	317.256	285.168	0.117408	1.61628	0.106033	0.817514	-0.189763
ENSMUSG00000015357	Clpx	protein_coding	1141.8	1061.97	1394.1	1364.49	1389.45	1374.4	1287.7	0.101614	1.61606	0.106082	0.817514	-0.164216
ENSMUSG00000056536	Pign	protein_coding	157.696	154.647	160.027	195.817	197.485	176.004	173.613	0.120745	1.61598	0.106098	0.817514	-0.195181
ENSMUSG00000020328	Nudcd2	protein_coding	100.806	84.1747	102.103	72.9864	67.5076	82.9575	85.0892	0.132444	-1.61484	0.106346	0.81895	0.213908
ENSMUSG00000003032	Klf4	protein_coding	365.295	270.142	261.149	232.31	174.311	311.651	269.143	0.128774	-1.61407	0.106511	0.819283	0.20779
ENSMUSG00000022614	Lmf2	protein_coding	142.725	201.628	141.374	139.742	123.932	125.557	145.826	0.128281	-1.61379	0.106572	0.819283	0.207099
ENSMUSG00000028029	Aimp1	protein_coding	416.197	441.428	444.738	336.45	381.871	403.577	404.043	0.107691	-1.6135	0.106635	0.819283	0.173755
ENSMUSG00000039457	Ppl	protein_coding	48.9056	63.6204	50.0698	42.7238	35.2652	39.2367	46.6369	0.134182	-1.6137	0.106593	0.819283	0.216665
ENSMUSG00000004085	Map3k20	protein_coding	2795.61	2766.02	2705.74	3003.12	2948.17	3285.79	2917.41	0.0873059	1.61144	0.107083	0.819351	-0.140688
ENSMUSG00000008575	Nfib	protein_coding	1939.26	2183.65	2202.09	1809.53	1896.26	1921.48	1992.04	0.0909512	-1.61282	0.106784	0.819351	0.146688
ENSMUSG00000008892	Vdac3	protein_coding	1946.25	1739.28	1881.06	1449.94	1654.44	1793.68	1744.11	0.0973583	-1.60862	0.107699	0.819351	0.156609
ENSMUSG00000022747	St3gal6	protein_coding	399.23	370.956	381.905	436.138	421.167	476.445	414.307	0.105744	1.61	0.107397	0.819351	-0.17025
ENSMUSG00000026536	Ifi211	protein_coding	193.626	368.998	354.416	310.637	591.447	520.166	389.882	0.125485	1.60931	0.107549	0.819351	-0.200955
ENSMUSG00000027510	Rbm38	protein_coding	545.947	417.937	406.449	350.691	400.008	409.182	421.702	0.11452	-1.60896	0.107625	0.819351	0.184251
ENSMUSG00000032340	Neo1	protein_coding	702.644	633.268	725.522	792.17	784.902	770.16	734.778	0.0980279	1.61202	0.106957	0.819351	-0.158029
ENSMUSG00000033107	Rnf125	protein_coding	271.476	264.269	430.012	359.592	378.849	446.177	358.396	0.124912	1.61036	0.10732	0.819351	-0.201132
ENSMUSG00000033420	Antxr1	protein_coding	50.9018	69.4931	72.6504	88.1178	99.75	67.2629	74.696	0.134254	1.6109	0.107201	0.819351	-0.216414
ENSMUSG00000033623	Pcgf3	protein_coding	249.519	257.418	262.13	298.176	324.439	281.383	278.844	0.112404	1.61159	0.107051	0.819351	-0.181176
ENSMUSG00000037112	Sik2	protein_coding	93.819	98.8563	112.903	131.732	112.848	137.889	114.674	0.12898	1.60797	0.107843	0.819351	-0.207446
ENSMUSG00000038587	Akap12	protein_coding	4617.09	4246.91	7570.36	6716.53	7121.55	10179.1	6741.93	0.13101	1.61129	0.107116	0.819351	-0.21051
ENSMUSG00000041515	Irf8	protein_coding	144.721	171.286	215.988	182.466	227.712	247.752	198.321	0.126485	1.60725	0.107999	0.819351	-0.203263
ENSMUSG00000044934	Zfp367	protein_coding	286.447	322.996	335.763	232.31	263.985	301.562	290.51	0.116036	-1.60797	0.107842	0.819351	0.186567
ENSMUSG00000048758	Rpl29	protein_coding	706.637	795.745	805.045	640.856	637.795	735.407	720.247	0.101594	-1.60781	0.107876	0.819351	0.163343
ENSMUSG00000055923	Aasdh	protein_coding	130.748	93.9625	97.1944	130.842	149.121	124.436	121.051	0.129744	1.60972	0.10746	0.819351	-0.208899
ENSMUSG00000059486	Kbtbd2	protein_coding	317.388	387.595	434.92	349.801	306.303	303.804	349.968	0.115703	-1.61011	0.107373	0.819351	0.186334
ENSMUSG00000062580	Timm17a	protein_coding	1337.42	1226.41	1279.24	1080.56	1085.16	1230.91	1206.61	0.0949005	-1.61027	0.10734	0.819351	0.152813
ENSMUSG00000078137	Ankrd63	protein_coding	23.9538	15.6604	9.81762	16.0214	36.2727	30.2683	21.999	0.118203	1.60726	0.107996	0.819351	-0.189035
ENSMUSG00000078813	Leng1	protein_coding	133.742	145.838	144.319	117.49	108.818	117.71	127.986	0.126101	-1.61099	0.107183	0.819351	0.203216
ENSMUSG00000091264	Smim13	protein_coding	359.307	375.85	402.522	467.291	424.189	425.998	409.193	0.106291	1.61312	0.106719	0.819351	-0.171481
ENSMUSG00000098557	Kctd12	protein_coding	144.721	219.246	231.696	217.179	247.864	270.172	221.813	0.12618	1.6082	0.107792	0.819351	-0.202908
ENSMUSG00000004562	Arhgef40	protein_coding	129.75	183.031	120.757	200.268	190.432	150.22	162.41	0.128964	1.60409	0.108693	0.819398	-0.20696
ENSMUSG00000015355	Cd48	protein_coding	13.973	17.618	14.7264	27.5924	24.1818	22.421	20.0854	0.121987	1.60457	0.108588	0.819398	-0.195642
ENSMUSG00000018509	Cenpv	protein_coding	89.8267	100.814	98.1762	78.3269	62.4697	84.0786	85.6153	0.132473	-1.60694	0.108068	0.819398	0.212939
ENSMUSG00000040265	Dnm3	protein_coding	51.8999	49.9176	48.1063	92.5682	69.5227	43.7209	59.2892	0.134192	1.60556	0.10837	0.819398	-0.215709
ENSMUSG00000044768	D1Ertd622e	protein_coding	80.844	113.538	102.103	106.809	125.947	144.615	112.309	0.131052	1.6065	0.108163	0.819398	-0.210504
ENSMUSG00000045838	A430105I19Rik	protein_coding	402.224	316.145	307.291	267.914	301.265	295.957	315.133	0.115858	-1.60397	0.108721	0.819398	0.185835
ENSMUSG00000050382	Kif7	protein_coding	5.98845	6.85143	4.90881	16.0214	11.0833	8.96838	8.9703	0.097284	1.60549	0.108385	0.819398	-0.155261
ENSMUSG00000052374	Actn2	protein_coding	17287.6	16400.4	16710.6	14698.8	14315.6	16246.2	15943.2	0.0856812	-1.60386	0.108744	0.819398	0.137421
ENSMUSG00000062373	Tmem65	protein_coding	2347.47	2399.96	2530	2051.63	2076.61	2348.59	2292.38	0.0911809	-1.6044	0.108626	0.819398	0.146289
ENSMUSG00000062929	Cfl2	protein_coding	3827.62	3874.97	4163.65	3421.46	3355.23	3814.92	3742.98	0.0893764	-1.60509	0.108473	0.819398	0.143457
ENSMUSG00000066191	Anks6	protein_coding	11.9769	13.7029	8.83586	15.1313	22.1667	22.421	15.7058	0.114427	1.60479	0.108539	0.819398	-0.182905
ENSMUSG00000069539	Scyl2	protein_coding	359.307	317.123	370.124	378.283	420.159	421.514	377.752	0.108857	1.60559	0.108365	0.819398	-0.174779
ENSMUSG00000037278	Tmem97	protein_coding	26.948	30.342	34.3617	22.252	23.1742	13.4526	25.0884	0.125887	-1.60304	0.108926	0.820308	0.201915
ENSMUSG00000048458	Fam212b	protein_coding	61.8806	78.302	97.1944	52.5146	70.5303	54.9313	69.2256	0.134488	-1.60224	0.109102	0.821164	0.215517
ENSMUSG00000000976	Heatr6	protein_coding	82.8402	92.9837	90.3221	120.161	107.811	106.5	100.103	0.130048	1.60098	0.109382	0.821432	-0.208315
ENSMUSG00000008683	Rps15a	protein_coding	1152.78	1224.45	1294.94	1028.93	1066.02	1153.56	1153.45	0.0948856	-1.59906	0.109807	0.821432	0.151727
ENSMUSG00000018672	Copz2	protein_coding	176.659	169.328	180.644	145.083	150.129	140.131	160.329	0.121911	-1.59916	0.109786	0.821432	0.195011
ENSMUSG00000022906	Parp9	protein_coding	370.286	560.838	628.327	489.543	965.258	896.838	651.848	0.128064	1.60139	0.109291	0.821432	-0.204287
ENSMUSG00000026603	Smyd2	protein_coding	383.261	365.083	431.975	327.549	309.326	372.188	364.897	0.111225	-1.59902	0.109816	0.821432	0.177851
ENSMUSG00000027959	Sass6	protein_coding	5.98845	10.7665	5.89057	11.571	14.1061	17.9368	11.0432	0.103331	1.60086	0.109408	0.821432	-0.164252
ENSMUSG00000028729	Ebna1bp2	protein_coding	237.542	253.503	244.459	215.399	206.553	198.425	225.98	0.115515	-1.59996	0.109607	0.821432	0.184867
ENSMUSG00000032496	Ltf	protein_coding	1.99615	2.93633	10.7994	4.45039	13.0985	19.0578	8.72309	0.0871442	1.60145	0.109278	0.821432	-0.136596
ENSMUSG00000036206	Sh3bp4	protein_coding	255.507	269.163	268.021	294.616	310.333	323.983	286.937	0.11117	1.59991	0.109619	0.821432	-0.177869
ENSMUSG00000059325	Hopx	protein_coding	1810.51	1505.36	1646.41	1456.17	1477.11	1459.6	1559.19	0.094161	-1.60028	0.109537	0.821432	0.150685
ENSMUSG00000059436	Max	protein_coding	404.22	401.298	405.468	372.053	344.591	327.346	375.829	0.106803	-1.5997	0.109666	0.821432	0.170883
ENSMUSG00000045038	Prkce	protein_coding	479.076	495.26	489.899	566.98	565.25	540.345	522.802	0.100294	1.59818	0.110004	0.821911	-0.160298
ENSMUSG00000053113	Socs3	protein_coding	1778.57	1732.43	1721.03	1963.51	1706.83	2335.14	1872.92	0.102375	1.5984	0.109954	0.821911	-0.163632
ENSMUSG00000021294	Kif26a	protein_coding	34.9326	53.8327	63.8145	48.9543	29.2197	25.7841	42.7563	0.131142	-1.59698	0.11027	0.82303	0.209671
ENSMUSG00000030337	Vamp1	protein_coding	63.8768	78.302	61.851	56.965	42.3182	52.6892	59.3337	0.134553	-1.59667	0.110339	0.82303	0.21497
ENSMUSG00000031627	Irf2	protein_coding	252.513	338.656	323.981	296.396	379.856	429.361	336.794	0.121197	1.5968	0.110311	0.82303	-0.193497
ENSMUSG00000029344	Tpst2	protein_coding	145.719	180.095	178.681	135.292	154.159	121.073	152.503	0.125782	-1.59463	0.110795	0.824837	0.200651
ENSMUSG00000032584	Mst1r	protein_coding	20.9596	30.342	12.7629	32.0428	35.2652	31.3893	27.127	0.125964	1.59461	0.110799	0.824837	-0.200654
ENSMUSG00000034453	Polr3b	protein_coding	155.7	157.583	170.827	132.622	130.985	134.526	147.04	0.123573	-1.5942	0.110892	0.824837	0.197052
ENSMUSG00000036333	Kidins220	protein_coding	922.221	836.853	839.406	948.824	1082.14	927.106	926.091	0.0986151	1.5946	0.110803	0.824837	-0.157255
ENSMUSG00000044067	Gpr22	protein_coding	402.224	274.057	370.124	246.552	332.5	286.988	318.741	0.122076	-1.59433	0.110863	0.824837	0.194618
ENSMUSG00000083327	Vcp-rs	processed_pseudogene	63.8768	68.5143	64.7963	43.6138	43.3258	60.5366	57.4439	0.134569	-1.59339	0.111073	0.825726	0.21434
ENSMUSG00000017677	Wsb1	protein_coding	489.056	573.562	703.923	610.594	715.379	757.828	641.724	0.114	1.59227	0.111324	0.826283	-0.18151
ENSMUSG00000075514	Gm13375	antisense_RNA	75.8537	113.538	114.866	80.9971	67.5076	86.3207	89.8472	0.133374	-1.59233	0.11131	0.826283	0.21242
ENSMUSG00000095681	Gm8281	protein_coding	5.98845	6.85143	5.89057	8.90078	12.0909	16.8157	9.42298	0.0987059	1.59198	0.111389	0.826283	-0.155716
ENSMUSG00000113321	AC149586.1	lincRNA	25.9499	17.618	16.6899	9.79086	16.1212	8.96838	15.8564	0.11377	-1.59195	0.111396	0.826283	0.180495
ENSMUSG00000025781	Atp5c1	protein_coding	11336.1	10103.9	11737.9	9020.95	9691.87	10736.3	10437.8	0.0931103	-1.59157	0.111481	0.826452	0.148191
ENSMUSG00000031444	F10	protein_coding	11.9769	19.5755	5.89057	23.142	16.1212	25.7841	17.0817	0.11303	1.59094	0.111624	0.827048	-0.17903
ENSMUSG00000006462	A530013C23Rik	lincRNA	31.9384	21.5331	21.5988	12.4611	14.1061	20.1789	20.3027	0.120639	-1.58834	0.112209	0.828821	0.190914
ENSMUSG00000024414	Mrpl27	protein_coding	124.759	127.241	113.884	82.7773	104.788	105.378	109.805	0.129629	-1.58897	0.112067	0.828821	0.205967
ENSMUSG00000030057	Cnbp	protein_coding	3380.48	3091.95	3531.4	3004.01	2895.77	3051.49	3159.18	0.0884971	-1.58911	0.112035	0.828821	0.140632
ENSMUSG00000041075	Fzd7	protein_coding	52.8979	53.8327	53.0151	69.4261	70.5303	70.626	61.7214	0.134216	1.58898	0.112065	0.828821	-0.213354
ENSMUSG00000042506	Usp22	protein_coding	280.459	235.885	245.44	241.211	205.545	188.336	232.813	0.11924	-1.58822	0.112237	0.828821	0.189449
ENSMUSG00000067274	Rplp0	protein_coding	4218.86	4039.41	4290.3	3474.87	3765.31	3994.29	3963.84	0.0882964	-1.58847	0.112181	0.828821	0.140255
ENSMUSG00000027455	Nsfl1c	protein_coding	498.039	419.895	441.793	396.975	384.894	393.488	422.514	0.106519	-1.58763	0.112371	0.829351	0.169124
ENSMUSG00000002325	Irf9	protein_coding	358.309	570.626	531.133	445.929	666.008	678.234	541.706	0.125484	1.58565	0.11282	0.829772	-0.198938
ENSMUSG00000003184	Irf3	protein_coding	185.642	169.328	156.1	154.874	118.894	143.494	154.722	0.125284	-1.58435	0.113114	0.829772	0.19856
ENSMUSG00000011306	Sugp1	protein_coding	169.673	183.031	188.498	138.852	169.273	137.889	164.536	0.123315	-1.58463	0.113051	0.829772	0.195454
ENSMUSG00000028851	Nudc	protein_coding	660.725	498.197	609.674	473.522	497.742	547.071	547.822	0.109967	-1.58456	0.113066	0.829772	0.174244
ENSMUSG00000035885	Cox8a	protein_coding	535.966	670.461	541.932	485.983	447.364	563.887	540.932	0.111044	-1.585	0.112967	0.829772	0.176001
ENSMUSG00000044364	Tmem74b	protein_coding	10.9788	12.7241	9.81762	21.3619	13.0985	23.542	15.2538	0.11332	1.58562	0.112825	0.829772	-0.179087
ENSMUSG00000044461	Shisa2	protein_coding	11.9769	3.9151	3.92705	9.79086	18.1364	12.3315	10.013	0.0970168	1.58627	0.112678	0.829772	-0.152244
ENSMUSG00000045962	Wnk1	protein_coding	7109.28	7222.39	6259.71	7704.52	7667.65	7590.61	7259.03	0.0873591	1.58489	0.112992	0.829772	-0.138455
ENSMUSG00000051855	Mest	protein_coding	32.9365	49.9176	59.8875	31.1527	33.25	35.8735	40.503	0.132397	-1.5847	0.113034	0.829772	0.209724
ENSMUSG00000060679	Mrps9	protein_coding	732.587	672.419	758.902	583.891	634.773	675.992	676.427	0.10105	-1.58444	0.113094	0.829772	0.160105
ENSMUSG00000062157	Ifnlr1	protein_coding	50.9018	98.8563	107.012	68.536	61.4621	59.4155	74.364	0.134538	-1.58533	0.112891	0.829772	0.213347
ENSMUSG00000058756	Thra	protein_coding	323.376	316.145	339.69	336.45	410.083	397.972	353.953	0.110623	1.58406	0.113181	0.829806	-0.175228
ENSMUSG00000000346	Dazap2	protein_coding	1716.69	1717.75	1910.51	1562.98	1613.13	1594.13	1685.86	0.0903764	-1.58168	0.113723	0.83034	0.142948
ENSMUSG00000000805	Car4	protein_coding	196.621	140.944	146.282	242.101	181.364	173.762	180.179	0.12775	1.5826	0.113513	0.83034	-0.202259
ENSMUSG00000026574	Dpt	protein_coding	504.028	619.565	550.768	628.395	706.311	598.639	601.284	0.106008	1.5827	0.113489	0.83034	-0.16779
ENSMUSG00000027007	Ssfa2	protein_coding	474.085	561.817	511.498	439.699	464.492	439.451	481.84	0.104771	-1.58309	0.113402	0.83034	0.165873
ENSMUSG00000039771	Polr2j	protein_coding	111.784	109.623	117.811	89.8979	96.7273	84.0786	101.654	0.129714	-1.58158	0.113746	0.83034	0.20525
ENSMUSG00000041040	Fam117b	protein_coding	258.501	280.909	193.407	256.343	198.492	108.742	216.066	0.133408	-1.58155	0.113753	0.83034	0.211102
ENSMUSG00000064360	mt-Nd3	protein_coding	74.8556	31.3208	37.3069	40.9436	62.4697	110.984	59.6467	0.129021	1.58299	0.113423	0.83034	-0.203466
ENSMUSG00000078771	Evi2a	protein_coding	11.9769	16.6392	10.7994	21.3619	30.2273	14.5736	17.5964	0.115997	1.58202	0.113646	0.83034	-0.183135
ENSMUSG00000031604	Msmo1	protein_coding	50.9018	58.7265	61.851	83.6674	64.4849	77.3523	66.164	0.134219	1.5811	0.113855	0.830633	-0.212332
ENSMUSG00000019906	Lin7a	protein_coding	22.9557	33.2784	24.544	13.3512	21.1591	16.8157	22.0174	0.122912	-1.57893	0.114352	0.832091	0.193672
ENSMUSG00000019988	Nedd1	protein_coding	338.347	287.76	340.671	404.986	347.614	376.672	349.342	0.111326	1.57841	0.114472	0.832091	-0.175739
ENSMUSG00000021494	Ddx41	protein_coding	97.8113	93.9625	78.5409	70.3162	68.5152	71.747	80.1488	0.132758	-1.57774	0.114626	0.832091	0.209533
ENSMUSG00000021520	Uqcrb	protein_coding	3520.21	3077.27	3348.79	2678.25	2828.27	3283.55	3122.72	0.0961796	-1.5786	0.114427	0.832091	0.151827
ENSMUSG00000035566	Pcdh17	protein_coding	82.8402	112.559	135.483	126.391	130.985	162.552	125.135	0.131294	1.57868	0.11441	0.832091	-0.207244
ENSMUSG00000035877	Zhx3	protein_coding	452.128	516.794	506.589	453.05	417.136	409.182	459.146	0.105316	-1.57748	0.114685	0.832091	0.166157
ENSMUSG00000035948	Acss3	protein_coding	5.98845	4.89388	5.89057	15.1313	17.1288	3.36314	8.73269	0.0918107	1.57699	0.114799	0.832091	-0.143355
ENSMUSG00000037750	Fam222b	protein_coding	110.786	126.262	130.574	112.15	86.6515	94.168	110.099	0.129813	-1.5769	0.114818	0.832091	0.204835
ENSMUSG00000038055	Dexi	protein_coding	115.777	99.8351	120.757	128.171	134.008	154.705	125.542	0.127717	1.57895	0.114347	0.832091	-0.201658
ENSMUSG00000052911	Lamb2	protein_coding	2497.18	2840.41	2883.43	2575	2313.39	2427.07	2589.41	0.0922072	-1.57668	0.114868	0.832091	0.145384
ENSMUSG00000057913	Gm10032	lincRNA	8.98267	8.80898	24.544	10.6809	3.02273	6.72629	10.4609	0.0956006	-1.57678	0.114846	0.832091	0.149345
ENSMUSG00000079620	Muc4	protein_coding	8.98267	1.95755	2.94529	10.6809	8.06061	12.3315	7.4931	0.0884597	1.57753	0.114674	0.832091	-0.137559
ENSMUSG00000085882	2610507I01Rik	processed_transcript	29.9422	36.2147	27.4893	46.2841	40.303	45.9629	37.6994	0.132811	1.57705	0.114784	0.832091	-0.209501
ENSMUSG00000074264	Amy1	protein_coding	99.8074	97.8776	115.848	114.82	154.159	123.315	117.638	0.129606	1.57638	0.114939	0.832148	-0.204336
ENSMUSG00000022952	Runx1	protein_coding	118.771	150.731	102.103	151.313	167.258	142.373	138.758	0.128387	1.57513	0.115227	0.832425	-0.202279
ENSMUSG00000029166	Mapre3	protein_coding	264.49	239.8	198.316	298.176	277.083	260.083	256.325	0.118065	1.57519	0.115213	0.832425	-0.186011
ENSMUSG00000058239	Usf2	protein_coding	183.646	196.734	161.991	206.498	208.568	235.42	198.809	0.120031	1.57527	0.115195	0.832425	-0.189085
ENSMUSG00000074682	Zcchc3	protein_coding	34.9326	41.1086	43.1975	61.4154	39.2955	65.0208	47.4951	0.133785	1.57517	0.115218	0.832425	-0.210735
ENSMUSG00000020593	Lpin1	protein_coding	2482.21	2367.66	2479.93	2910.56	2657.98	2609.8	2584.69	0.0882744	1.57394	0.1155	0.832591	-0.138941
ENSMUSG00000026279	Thap4	protein_coding	173.665	178.137	174.754	142.413	128.97	163.673	160.268	0.123373	-1.57451	0.11537	0.832591	0.194265
ENSMUSG00000028937	Acot7	protein_coding	398.232	391.51	358.343	313.308	309.326	364.34	355.843	0.110033	-1.57427	0.115424	0.832591	0.173219
ENSMUSG00000063236	1110038F14Rik	protein_coding	70.8633	57.7478	62.8327	50.7345	47.3561	44.8419	55.7294	0.13456	-1.57408	0.115468	0.832591	0.211954
ENSMUSG00000026924	Sec16a	protein_coding	595.85	625.438	561.568	714.733	691.197	627.787	636.095	0.100832	1.57355	0.115591	0.832792	-0.158678
ENSMUSG00000003882	Il7r	protein_coding	8.98267	2.93633	5.89057	9.79086	13.0985	13.4526	9.02525	0.0963311	1.57281	0.115762	0.833573	-0.150045
ENSMUSG00000019787	Trdn	protein_coding	5241.89	4877.24	5827.74	4382.75	4637.87	5124.31	5015.3	0.094347	-1.57239	0.115859	0.833822	0.148349
ENSMUSG00000022957	Itsn1	protein_coding	579.881	609.777	542.914	627.505	717.394	636.755	619.038	0.101884	1.57114	0.116151	0.835469	-0.160078
ENSMUSG00000019689	Fmc1	protein_coding	254.509	244.694	254.276	182.466	202.523	247.752	231.037	0.119315	-1.56892	0.116666	0.83576	0.187168
ENSMUSG00000019856	Fam184a	protein_coding	35.9307	19.5755	16.6899	15.1313	15.1136	13.4526	19.3156	0.117931	-1.56887	0.116679	0.83576	0.184553
ENSMUSG00000022216	Psme1	protein_coding	744.563	815.32	883.586	643.527	703.288	784.733	762.503	0.103588	-1.56916	0.116612	0.83576	0.162539
ENSMUSG00000026116	Tmem131	protein_coding	549.939	658.716	630.291	718.293	692.205	689.444	656.481	0.1013	1.56853	0.116756	0.83576	-0.158901
ENSMUSG00000029417	Cxcl9	protein_coding	276.467	1071.76	921.874	485.983	2790.98	2513.39	1343.41	0.0766476	1.56874	0.116709	0.83576	-0.113972
ENSMUSG00000031822	Gse1	protein_coding	95.8151	144.859	118.793	138.852	136.023	176.004	135.058	0.129895	1.56914	0.116614	0.83576	-0.203806
ENSMUSG00000039167	Adgrl4	protein_coding	788.479	802.596	857.078	1086.79	951.152	788.096	879.031	0.106836	1.56934	0.116569	0.83576	-0.167681
ENSMUSG00000048756	Foxo3	protein_coding	1241.6	1319.39	1342.07	1571.88	1473.08	1350.86	1383.15	0.094037	1.5701	0.116391	0.83576	-0.147654
ENSMUSG00000050064	Zfp697	protein_coding	323.376	246.651	231.696	292.836	313.356	352.009	293.321	0.119271	1.56906	0.116633	0.83576	-0.187129
ENSMUSG00000021982	Cdadc1	protein_coding	445.141	416.958	440.811	380.954	362.727	389.003	405.932	0.104943	-1.56611	0.117323	0.839163	0.164364
ENSMUSG00000037032	Apbb1	protein_coding	613.816	470.791	499.717	626.615	582.379	624.423	569.624	0.107708	1.56595	0.117361	0.839163	-0.168669
ENSMUSG00000045102	Poln	protein_coding	25.9499	22.5118	21.5988	38.2734	29.2197	35.8735	28.9045	0.129301	1.56569	0.117421	0.839163	-0.202442
ENSMUSG00000020721	Helz	protein_coding	327.368	375.85	326.927	422.787	373.811	399.093	370.973	0.109125	1.56527	0.11752	0.839419	-0.170828
ENSMUSG00000111605	AC120394.3	TEC	24.9519	14.6816	8.83586	11.571	11.0833	1.12105	12.0408	0.0973975	-1.56492	0.117603	0.839561	0.1513
ENSMUSG00000018770	Atp5g3	protein_coding	8256.07	8519.26	8612.01	7321.79	7165.88	8294.63	8028.27	0.0878386	-1.56402	0.117813	0.840196	0.137381
ENSMUSG00000040485	Lrrc52	protein_coding	18.9634	9.78776	5.89057	24.0321	18.1364	17.9368	15.7912	0.111424	1.56387	0.117847	0.840196	-0.173592
ENSMUSG00000066705	Fxyd6	protein_coding	113.78	133.113	127.629	162.884	155.167	139.01	138.597	0.12564	1.56373	0.117881	0.840196	-0.196553
ENSMUSG00000107706	Gm44022	TEC	40.921	26.4269	9.81762	9.79086	15.1136	20.1789	20.3748	0.112414	-1.5629	0.118077	0.841142	0.174228
ENSMUSG00000020038	Cry1	protein_coding	212.59	247.63	310.237	219.849	195.47	224.21	234.998	0.12219	-1.56234	0.118209	0.841628	0.190927
ENSMUSG00000022403	St13	protein_coding	1384.33	1128.53	1118.23	1047.62	1091.2	1050.42	1136.72	0.100051	-1.56031	0.118687	0.842777	0.156112
ENSMUSG00000024583	Txnl1	protein_coding	793.469	781.063	818.789	642.637	720.417	746.618	750.499	0.098609	-1.56071	0.118592	0.842777	0.153897
ENSMUSG00000031422	Morf4l2	protein_coding	924.217	703.74	837.443	727.194	681.121	735.407	768.187	0.105005	-1.56061	0.118615	0.842777	0.163875
ENSMUSG00000036339	Tmem260	protein_coding	89.8267	90.0474	74.6139	113.93	109.826	96.4101	95.7756	0.131091	1.56042	0.118661	0.842777	-0.204667
ENSMUSG00000037145	2210407C18Rik	protein_coding	80.844	52.8539	59.8875	40.9436	38.2879	62.7787	55.9326	0.134181	-1.56125	0.118464	0.842777	0.209253
ENSMUSG00000028518	Prkaa2	protein_coding	2210.73	2042.7	2043.05	2380.96	2291.23	2337.38	2217.68	0.0873906	1.55993	0.118776	0.842962	-0.136324
ENSMUSG00000003235	Eif2b5	protein_coding	502.031	504.069	496.771	413.886	467.515	431.603	469.313	0.103238	-1.55264	0.120508	0.843753	0.160298
ENSMUSG00000010358	Ifi35	protein_coding	113.78	164.434	161.991	131.732	227.712	198.425	166.346	0.131515	1.557	0.11947	0.843753	-0.204702
ENSMUSG00000021178	Psmc1	protein_coding	1166.75	933.752	1150.62	913.22	984.402	952.89	1016.94	0.101302	-1.55408	0.120164	0.843753	0.157433
ENSMUSG00000021771	Vdac2	protein_coding	3832.61	3277.92	3514.71	3055.64	2952.2	3438.25	3345.22	0.0939377	-1.55209	0.120642	0.843753	0.145798
ENSMUSG00000023345	Poc1a	protein_coding	29.9422	26.4269	30.4346	16.9115	21.1591	19.0578	23.9887	0.12608	-1.55329	0.120355	0.843753	0.195648
ENSMUSG00000024566	Atp9b	protein_coding	281.457	277.972	294.529	320.428	336.53	335.193	307.685	0.109469	1.5589	0.119019	0.843753	-0.170661
ENSMUSG00000026121	Sema4c	protein_coding	264.49	430.661	660.726	511.795	771.803	848.633	581.351	0.122338	1.55604	0.119697	0.843753	-0.189231
ENSMUSG00000026399	Cd55	protein_coding	74.8556	87.111	81.4862	96.1285	105.795	105.378	91.7925	0.13114	1.55873	0.11906	0.843753	-0.204455
ENSMUSG00000026489	Coq8a	protein_coding	3802.66	3901.4	3927.05	3408.11	3380.42	3696.09	3685.96	0.085563	-1.55219	0.120616	0.843753	0.13281
ENSMUSG00000026578	Ccdc181	protein_coding	99.8074	80.2596	96.2126	72.0964	78.5909	65.0208	81.998	0.13277	-1.5529	0.120446	0.843753	0.206286
ENSMUSG00000027284	Cdan1	protein_coding	74.8556	74.3869	51.0516	48.9543	56.4242	43.7209	58.2323	0.134564	-1.55228	0.120596	0.843753	0.208971
ENSMUSG00000028458	Tesk1	protein_coding	90.8248	113.538	81.4862	112.15	121.917	124.436	107.392	0.130436	1.55095	0.120913	0.843753	-0.202325
ENSMUSG00000028796	Phc2	protein_coding	234.547	408.149	393.686	380.954	470.538	412.545	383.403	0.125398	1.55252	0.120537	0.843753	-0.19468
ENSMUSG00000030060	Hmces	protein_coding	43.9153	35.2359	51.0516	34.7131	33.25	22.421	36.7645	0.131716	-1.55671	0.119539	0.843753	0.205243
ENSMUSG00000031556	Tm2d2	protein_coding	261.495	249.588	270.966	200.268	235.773	227.573	240.944	0.115702	-1.55815	0.119199	0.843753	0.180286
ENSMUSG00000031930	Wwp2	protein_coding	233.549	196.734	223.842	193.147	171.288	183.852	200.402	0.119404	-1.55141	0.120804	0.843753	0.185287
ENSMUSG00000032308	Ulk3	protein_coding	67.8691	36.2147	28.4711	42.7238	71.5379	76.2312	53.8413	0.131593	1.55335	0.120338	0.843753	-0.203972
ENSMUSG00000033730	Egr3	protein_coding	50.9018	88.0898	97.1944	53.4047	50.3788	71.747	68.6194	0.134483	-1.55094	0.120917	0.843753	0.208444
ENSMUSG00000034875	Nudt19	protein_coding	435.16	468.834	449.647	358.702	428.22	386.761	421.221	0.106942	-1.5528	0.120472	0.843753	0.166064
ENSMUSG00000038370	Pcp4l1	protein_coding	1634.85	1512.21	1610.09	1262.13	1344.11	1588.52	1491.98	0.0987315	-1.55144	0.120796	0.843753	0.153171
ENSMUSG00000042660	Wdr55	protein_coding	110.786	89.0686	107.994	88.1178	71.5379	82.9575	91.7436	0.131851	-1.5547	0.120019	0.843753	0.205083
ENSMUSG00000042705	Commd10	protein_coding	73.8575	62.6416	78.5409	55.1849	50.3788	58.2945	63.1497	0.134308	-1.55245	0.120555	0.843753	0.208569
ENSMUSG00000046598	Bdh1	protein_coding	1080.91	859.365	617.528	1004.01	996.492	1044.82	933.854	0.118947	1.5528	0.120471	0.843753	-0.184694
ENSMUSG00000049521	Cdc42ep1	protein_coding	152.705	198.691	197.334	162.884	147.106	141.252	166.662	0.124526	-1.5516	0.120759	0.843753	0.193292
ENSMUSG00000051579	Tceal8	protein_coding	113.78	134.092	153.155	98.7987	91.6894	130.042	120.26	0.130595	-1.55782	0.119277	0.843753	0.203409
ENSMUSG00000053214	Gm9899	processed_transcript	126.755	129.198	108.976	151.313	147.106	146.857	135.034	0.125607	1.55512	0.119916	0.843753	-0.195387
ENSMUSG00000058163	Gm5431	protein_coding	28.9442	65.578	57.9239	42.7238	150.129	98.6522	73.9918	0.10047	1.55157	0.120765	0.843753	-0.153033
ENSMUSG00000069515	Lyz1	protein_coding	6.98652	6.85143	5.89057	16.9115	11.0833	10.0894	9.63546	0.0997961	1.55141	0.120803	0.843753	-0.154102
ENSMUSG00000073176	Zfp449	protein_coding	32.9365	41.1086	52.0334	57.8551	62.4697	51.5682	49.6619	0.134261	1.55228	0.120596	0.843753	-0.208511
ENSMUSG00000079462	Gm15737	protein_coding	26.948	30.342	9.81762	28.4825	36.2727	39.2367	28.5166	0.124362	1.55144	0.120796	0.843753	-0.192426
ENSMUSG00000087260	Lamtor5	protein_coding	233.549	241.758	269.003	213.619	209.576	207.394	229.15	0.115954	-1.55225	0.120602	0.843753	0.180024
ENSMUSG00000109864	Eid3	protein_coding	19.9615	8.80898	9.81762	27.5924	16.1212	21.2999	17.2669	0.114325	1.55433	0.120106	0.843753	-0.177185
ENSMUSG00000035248	Zcchc6	protein_coding	600.841	831.959	798.172	701.382	975.333	965.222	812.152	0.116998	1.54967	0.121222	0.84544	-0.181294
ENSMUSG00000039704	Lmbrd2	protein_coding	162.686	171.286	196.352	209.168	224.689	199.546	193.955	0.120133	1.54924	0.121325	0.845716	-0.186152
ENSMUSG00000026526	Fh1	protein_coding	3425.39	3305.33	3528.45	2899.88	2856.48	3392.29	3234.64	0.0923658	-1.54869	0.121456	0.846189	0.143044
ENSMUSG00000022972	1110004E09Rik	protein_coding	139.73	124.305	125.665	99.6888	103.78	113.226	117.733	0.127785	-1.54827	0.121557	0.846443	0.197868
ENSMUSG00000081049	Rps24-ps3	processed_pseudogene	18.9634	25.4482	26.5076	13.3512	20.1515	10.0894	19.0852	0.118937	-1.54733	0.121785	0.847587	0.183779
ENSMUSG00000021832	Psmc6	protein_coding	1270.55	1139.29	1303.78	1101.92	1084.15	1117.68	1169.56	0.0938025	-1.54462	0.122438	0.848529	0.144891
ENSMUSG00000022255	Mtdh	protein_coding	763.527	849.577	864.932	922.121	925.962	948.406	879.088	0.0958611	1.54584	0.122144	0.848529	-0.148188
ENSMUSG00000023021	Cers5	protein_coding	173.665	164.434	196.352	146.863	155.167	141.252	162.956	0.122786	-1.54453	0.122459	0.848529	0.189699
ENSMUSG00000025494	Sigirr	protein_coding	26.948	16.6392	26.5076	19.5817	8.06061	14.5736	18.7185	0.116796	-1.54202	0.123068	0.848529	0.179813
ENSMUSG00000026688	Mgst3	protein_coding	1527.05	1542.55	1699.43	1364.49	1412.62	1480.9	1504.51	0.0919402	-1.54246	0.122962	0.848529	0.141814
ENSMUSG00000027339	Rassf2	protein_coding	70.8633	80.2596	81.4862	87.2277	104.788	103.136	87.9602	0.13193	1.54356	0.122695	0.848529	-0.203658
ENSMUSG00000030717	Nupr1	protein_coding	31.9384	27.4057	25.5258	47.1742	45.3409	29.1472	34.422	0.130963	1.54457	0.122449	0.848529	-0.202442
ENSMUSG00000036218	Pdzrn4	protein_coding	8.98267	8.80898	9.81762	13.3512	21.1591	14.5736	12.7822	0.108771	1.54477	0.122401	0.848529	-0.167345
ENSMUSG00000036986	Pml	protein_coding	173.665	389.553	370.124	317.758	587.417	610.971	408.248	0.118164	1.54269	0.122905	0.848529	-0.180882
ENSMUSG00000039756	Dnttip2	protein_coding	644.756	507.985	612.619	511.795	468.523	547.071	548.791	0.108159	-1.54323	0.122776	0.848529	0.166915
ENSMUSG00000039914	Coq10a	protein_coding	1896.34	1869.46	1915.42	1594.13	1678.62	1814.98	1794.82	0.0902124	-1.54215	0.123036	0.848529	0.13912
ENSMUSG00000040128	Pnrc1	protein_coding	985.099	1298.84	1456.93	1473.97	1386.42	1474.18	1345.91	0.10912	1.54292	0.122849	0.848529	-0.168365
ENSMUSG00000071337	Tia1	protein_coding	222.571	203.585	208.133	262.573	243.833	239.904	230.1	0.115567	1.54391	0.122609	0.848529	-0.17846
ENSMUSG00000085118	Gm15774	antisense_RNA	7.9846	5.87265	5.89057	16.9115	11.0833	10.0894	9.63868	0.0996131	1.5461	0.122081	0.848529	-0.153259
ENSMUSG00000090386	Mir99ahg	processed_transcript	180.651	145.838	184.571	115.71	134.008	167.036	154.636	0.127657	-1.5432	0.122782	0.848529	0.196941
ENSMUSG00000098766	Mir6386	miRNA	4.99037	5.87265	6.87233	8.90078	13.0985	13.4526	8.86453	0.0972965	1.54278	0.122885	0.848529	-0.148891
ENSMUSG00000100862	Gm10925	unprocessed_pseudogene	410.209	470.791	484.009	450.38	474.568	711.865	500.304	0.120941	1.54314	0.122797	0.848529	-0.186592
ENSMUSG00000109408	A930037H05Rik	processed_transcript	33.9345	44.0449	29.4529	19.5817	64.4849	80.7154	45.369	0.125602	1.5422	0.123025	0.848529	-0.192798
ENSMUSG00000028108	Ecm1	protein_coding	184.644	218.267	172.79	242.991	222.674	219.725	210.182	0.119599	1.5409	0.123341	0.84948	-0.184334
ENSMUSG00000032698	Lmo2	protein_coding	148.713	191.84	173.772	172.675	234.765	217.483	189.875	0.124498	1.54067	0.123397	0.84948	-0.191797
ENSMUSG00000037824	Tspan14	protein_coding	56.8902	99.8351	80.5045	70.3162	59.447	47.084	69.0128	0.134572	-1.54101	0.123315	0.84948	0.207573
ENSMUSG00000073002	Vamp5	protein_coding	158.694	128.22	134.501	114.82	124.939	102.015	127.198	0.127804	-1.5404	0.123464	0.849502	0.196945
ENSMUSG00000034714	Ttyh2	protein_coding	33.9345	44.0449	52.0334	35.6031	25.1894	30.2683	36.8456	0.131818	-1.5398	0.123609	0.850062	0.20308
ENSMUSG00000025499	Hras	protein_coding	264.49	268.185	237.586	212.729	212.598	229.815	237.567	0.115395	-1.53936	0.123715	0.850351	0.177649
ENSMUSG00000028967	Errfi1	protein_coding	1249.59	1602.26	1710.23	1331.56	1016.64	1523.5	1405.63	0.116057	-1.53875	0.123866	0.850809	0.178577
ENSMUSG00000040321	Zfp770	protein_coding	186.64	184.01	163.954	205.608	243.833	190.578	195.771	0.121311	1.53835	0.123964	0.850809	-0.186654
ENSMUSG00000044533	Rps2	protein_coding	3592.07	3800.59	3612.88	3166.01	3215.17	3522.33	3484.84	0.087283	-1.53831	0.123974	0.850809	0.134267
ENSMUSG00000029287	Tgfbr3	protein_coding	725.6	844.683	962.126	721.854	826.212	628.908	784.897	0.110868	-1.53766	0.124131	0.851008	0.170491
ENSMUSG00000039754	Alkbh4	protein_coding	19.9615	27.4057	15.7082	15.1313	15.1136	6.72629	16.6744	0.114053	-1.53788	0.124079	0.851008	0.175221
ENSMUSG00000085272	Sbk3	protein_coding	75.8537	45.0237	65.778	71.2063	92.697	81.8365	72.0658	0.134427	1.53726	0.124229	0.851244	-0.206616
ENSMUSG00000009090	Ap1b1	protein_coding	531.974	471.77	444.738	623.055	523.939	523.529	519.834	0.107801	1.53673	0.124361	0.851707	-0.16568
ENSMUSG00000027699	Ect2	protein_coding	6.98652	14.6816	18.6535	8.90078	7.05303	4.48419	10.1266	0.0986644	-1.53623	0.124483	0.852104	0.15075
ENSMUSG00000025498	Irf7	protein_coding	160.69	388.574	328.89	257.233	675.076	646.844	409.551	0.106167	1.53566	0.124622	0.852362	-0.16064
ENSMUSG00000029192	Tbc1d14	protein_coding	129.75	133.113	117.811	161.994	143.076	156.947	140.449	0.124954	1.53555	0.124648	0.852362	-0.191925
ENSMUSG00000002500	Rpl3l	protein_coding	1808.51	1693.28	1860.44	1484.65	1507.33	1767.89	1687.02	0.0957472	-1.53446	0.124917	0.852611	0.146917
ENSMUSG00000025269	Apex2	protein_coding	104.798	83.1959	81.4862	68.536	77.5833	63.8997	79.9165	0.133195	-1.53406	0.125015	0.852611	0.204414
ENSMUSG00000031633	Slc25a4	protein_coding	38619.5	34568.4	36298.7	31468.7	31620.8	35394.8	34661.8	0.0875898	-1.53459	0.124885	0.852611	0.134414
ENSMUSG00000031734	Irx3	protein_coding	337.349	313.208	314.164	276.814	446.356	440.572	354.744	0.12285	1.53478	0.124837	0.852611	-0.188504
ENSMUSG00000075271	Ttc30a1	protein_coding	20.9596	23.4906	17.6717	35.6031	30.2273	26.9051	25.8096	0.127154	1.53384	0.125069	0.852611	-0.195096
ENSMUSG00000114069	AC165273.4	processed_transcript	39.923	36.2147	39.2705	24.0321	35.2652	20.1789	32.4807	0.130312	-1.53402	0.125025	0.852611	0.199915
ENSMUSG00000047298	Kcnv2	protein_coding	166.678	102.771	131.556	160.214	172.295	162.552	149.345	0.128547	1.53349	0.125156	0.852768	-0.197138
ENSMUSG00000026914	Psmd14	protein_coding	486.062	500.154	500.698	448.6	385.902	460.751	463.694	0.105462	-1.53219	0.125474	0.853306	0.161596
ENSMUSG00000040123	Zmym5	protein_coding	401.226	396.404	458.483	375.613	368.773	343.041	390.59	0.107932	-1.53203	0.125514	0.853306	0.165379
ENSMUSG00000054604	Cggbp1	protein_coding	392.243	494.282	516.407	417.447	399	390.125	434.917	0.110947	-1.53186	0.125556	0.853306	0.169976
ENSMUSG00000061894	Zscan20	protein_coding	58.8864	45.0237	46.1428	77.4368	73.553	49.3261	58.3948	0.13453	1.53247	0.125407	0.853306	-0.206345
ENSMUSG00000066607	6030419C18Rik	protein_coding	163.684	158.562	141.374	201.158	173.303	181.61	169.948	0.122203	1.53202	0.125519	0.853306	-0.18727
ENSMUSG00000042302	Ehbp1	protein_coding	810.436	754.636	831.552	523.366	707.318	815.002	740.385	0.114681	-1.53089	0.125796	0.8545	0.175539
ENSMUSG00000097415	AU020206	lincRNA	70.8633	101.793	71.6686	97.0186	116.879	97.5311	92.6255	0.132762	1.53006	0.126002	0.855461	-0.203184
ENSMUSG00000025746	Il6	protein_coding	486.062	1033.59	1277.27	957.724	1504.31	2373.26	1272.04	0.110333	1.52933	0.126183	0.856256	-0.166715
ENSMUSG00000021597	Slf1	protein_coding	337.349	318.102	359.325	378.283	409.076	383.398	364.256	0.107781	1.52867	0.126347	0.856613	-0.16477
ENSMUSG00000076432	Ywhaq	protein_coding	205.603	245.673	273.912	190.477	202.523	216.362	222.425	0.120087	-1.5286	0.126364	0.856613	0.183572
ENSMUSG00000018286	Psmb6	protein_coding	757.538	693.952	714.723	598.133	603.538	702.897	678.463	0.101478	-1.52616	0.126969	0.857731	0.154866
ENSMUSG00000020430	Pes1	protein_coding	279.461	270.142	255.258	254.562	210.583	217.483	247.915	0.116013	-1.52732	0.126682	0.857731	0.177238
ENSMUSG00000020720	Psmd12	protein_coding	1252.58	1022.82	1151.61	1005.79	994.477	1031.36	1076.44	0.0977943	-1.52584	0.12705	0.857731	0.14922
ENSMUSG00000021890	Eaf1	protein_coding	215.584	242.736	229.732	221.63	169.273	184.973	210.655	0.120418	-1.5257	0.127085	0.857731	0.183789
ENSMUSG00000022849	Hspbap1	protein_coding	20.9596	34.2571	22.5805	18.6916	46.3485	54.9313	32.9614	0.124723	1.52698	0.126766	0.857731	-0.189668
ENSMUSG00000023456	Tpi1	protein_coding	4908.53	4703.02	4551.45	4120.17	4087.74	4546.97	4486.31	0.0872133	-1.52752	0.126632	0.857731	0.13322
ENSMUSG00000028333	Anp32b	protein_coding	517.003	548.114	602.802	482.423	499.758	478.687	521.464	0.10299	-1.52594	0.127024	0.857731	0.157166
ENSMUSG00000035206	Sppl2b	protein_coding	55.8922	70.4718	56.9422	76.5467	75.5682	85.1996	70.1035	0.133841	1.5257	0.127084	0.857731	-0.204239
ENSMUSG00000041046	Ramp3	protein_coding	45.9114	52.8539	49.0881	40.9436	29.2197	36.9946	42.5019	0.133694	-1.5256	0.127109	0.857731	0.204091
ENSMUSG00000008305	Tle1	protein_coding	124.759	110.602	120.757	101.469	101.765	82.9575	107.052	0.129614	-1.5245	0.127383	0.858032	0.197717
ENSMUSG00000024079	Eif2ak2	protein_coding	282.455	627.395	615.565	451.27	1084.15	1138.98	699.97	0.108556	1.52506	0.127244	0.858032	-0.163406
ENSMUSG00000026814	Eng	protein_coding	839.381	1250.88	1175.17	979.976	889.689	933.833	1011.49	0.112089	-1.52413	0.127476	0.858032	0.170844
ENSMUSG00000032594	Ip6k1	protein_coding	262.494	306.357	364.234	310.637	261.97	193.941	283.272	0.125254	-1.52488	0.127289	0.858032	0.191082
ENSMUSG00000097504	4930516B21Rik	lincRNA	8.98267	14.6816	8.83586	7.12063	5.03788	3.36314	8.00363	0.0930199	-1.52418	0.127463	0.858032	0.140891
ENSMUSG00000022548	Apod	protein_coding	34.9326	72.4294	65.778	59.6353	104.788	72.8681	68.4052	0.133968	1.52372	0.127577	0.858221	-0.204012
ENSMUSG00000029406	Pitpnm2	protein_coding	619.804	718.421	691.16	605.253	606.561	573.976	635.863	0.100575	-1.5235	0.127634	0.858221	0.153237
ENSMUSG00000030579	Tyrobp	protein_coding	40.921	66.5567	62.8327	85.4475	64.4849	75.1102	65.8922	0.134554	1.52222	0.127955	0.859948	-0.204927
ENSMUSG00000057863	Rpl36	protein_coding	878.305	860.344	951.327	798.4	709.333	862.086	843.299	0.100449	-1.51987	0.128545	0.863474	0.152669
ENSMUSG00000034120	Srsf2	protein_coding	681.685	583.35	645.017	613.264	529.985	523.529	596.138	0.104589	-1.51954	0.128627	0.863593	0.158945
ENSMUSG00000027933	Ints3	protein_coding	238.54	282.866	215.988	196.707	231.742	189.457	225.883	0.120784	-1.51914	0.128728	0.863834	0.183518
ENSMUSG00000021868	Ppif	protein_coding	935.196	1031.63	999.433	790.39	846.364	977.553	930.094	0.10069	-1.51608	0.129498	0.86479	0.152648
ENSMUSG00000024130	Abca3	protein_coding	92.8209	97.8776	95.2309	139.742	126.955	90.8048	107.239	0.131402	1.51622	0.129465	0.86479	-0.199389
ENSMUSG00000024446	Rpp21	protein_coding	48.9056	59.7053	54.9787	36.4932	41.3106	43.7209	47.519	0.134354	-1.51571	0.129594	0.86479	0.20363
ENSMUSG00000025915	Sgk3	protein_coding	138.732	178.137	168.863	193.147	205.545	183.852	178.046	0.122448	1.51582	0.129565	0.86479	-0.185651
ENSMUSG00000026309	Ilkap	protein_coding	278.463	268.185	302.383	253.672	225.697	246.63	262.505	0.113897	-1.51618	0.129474	0.86479	0.172716
ENSMUSG00000027514	Zbp1	protein_coding	38.9249	118.432	56.9422	65.8658	183.379	165.915	104.91	0.0974816	1.51548	0.12965	0.86479	-0.144706
ENSMUSG00000027996	Sfrp2	protein_coding	8.98267	4.89388	4.90881	14.2413	12.0909	10.0894	9.20116	0.0980295	1.51746	0.12915	0.86479	-0.147867
ENSMUSG00000037762	Slc16a9	protein_coding	12.975	9.78776	5.89057	19.5817	17.1288	13.4526	13.1361	0.108593	1.5181	0.128988	0.86479	-0.164343
ENSMUSG00000039701	Usp53	protein_coding	286.447	224.14	227.769	214.509	173.303	228.694	225.81	0.122109	-1.51571	0.129592	0.86479	0.185091
ENSMUSG00000043940	Wdfy3	protein_coding	528.979	697.867	617.528	751.226	731.5	642.36	661.577	0.10802	1.51581	0.129567	0.86479	-0.163753
ENSMUSG00000071076	Jund	protein_coding	297.426	264.269	296.492	215.399	164.235	318.377	259.366	0.128594	-1.51778	0.12907	0.86479	0.195106
ENSMUSG00000106665	Gm43389	TEC	17.9653	8.80898	17.6717	8.90078	5.03788	10.0894	11.4124	0.10313	-1.51792	0.129035	0.86479	0.155493
ENSMUSG00000015405	Ace2	protein_coding	22.9557	19.5755	20.617	31.1527	34.2576	28.0262	26.0975	0.127763	1.51501	0.12977	0.865155	-0.193544
ENSMUSG00000025484	Bet1l	protein_coding	51.8999	53.8327	61.851	41.8337	39.2955	43.7209	48.7389	0.134461	-1.51467	0.129855	0.865287	0.203729
ENSMUSG00000031072	Oraov1	protein_coding	101.804	89.0686	95.2309	70.3162	80.6061	76.2312	85.5428	0.131954	-1.51376	0.130086	0.865961	0.19979
[truncated: 14,123 more rows]

## Sheet: Supplementary Table 2
Supplementary Table 2. GO enrichment analysis for mouse RNA-seq study.
geneSet	description	size	overlap	expect	enrichmentRatio	pValue	FDR	database	userId
GO:0048511	rhythmic process	224	11	1.07514	10.2312	7e-09	1.08e-05	geneontology_Biological_Process_noRedundant	Per2;Nr1d2;Arntl;Per3;Dbp;Tef;Clock;Ptx3;Jun;Egfr;Hlf
GO:0002791	regulation of peptide secretion	350	12	1.6799	7.14327	7.34e-08	5.67e-05	geneontology_Biological_Process_noRedundant	Per2;Arntl;Clock;S100a9;Mmp13;Egfr;Cd14;Nlrp3;S100a8;Zc3h12a;Clec4e;Ccl5
GO:0050727	regulation of inflammatory response	252	9	1.20953	7.44091	2.74e-06	0.00141128	geneontology_Biological_Process_noRedundant	Nr1d2;Clock;S100a9;Egfr;Nlrp3;S100a8;Pik3ap1;Zc3h12a;Ccl5
mmu04710	Circadian rhythm	30	4	0.143992	27.7794	1.19e-05	0.00457976	pathway_KEGG	Per2;Arntl;Per3;Clock
GO:0002764	immune response-regulating signaling pathway	241	8	1.15673	6.91603	1.77e-05	0.0054583	geneontology_Biological_Process_noRedundant	Ptprc;Clec4d;Lcp2;Cd14;Pik3ap1;Zc3h12a;Clec4e;Fpr2
mmu04657	IL-17 signaling pathway	75	5	0.359979	13.8897	2.83e-05	0.00665478	pathway_KEGG	Mmp3;S100a9;Mmp13;Jun;S100a8
GO:0035326	enhancer binding	76	5	0.364779	13.7069	3.02e-05	0.00665478	geneontology_Molecular_Function_noRedundant	Per2;Nr1d2;Arntl;Clock;Jun
mmu05164	Influenza A	133	6	0.638363	9.39904	3.97e-05	0.00766191	pathway_KEGG	Hspa1b;Hspa1a;Dnajb1;Jun;Nlrp3;Ccl5
GO:0038061	NIK/NF-kappaB signaling	91	5	0.436775	11.4476	7.19e-05	0.0121608	geneontology_Biological_Process_noRedundant	Egfr;Birc3;Cd14;Nlrp3;Zc3h12a
GO:0072593	reactive oxygen species metabolic process	219	7	1.05114	6.65944	7.88e-05	0.0121608	geneontology_Biological_Process_noRedundant	Cdkn1a;Mmp3;Ptx3;Egfr;Birc3;Zc3h12a;Fpr2
mmu05168	Herpes simplex infection	160	6	0.767955	7.81295	0.000111128	0.0155983	pathway_KEGG	Per2;Arntl;Per3;Clock;Jun;Ccl5
GO:0007159	leukocyte cell-cell adhesion	240	7	1.15193	6.07674	0.00013957	0.0174519	geneontology_Biological_Process_noRedundant	S100a9;Ptprc;Hsph1;Nlrp3;S100a8;Zc3h12a;Ccl5
GO:0050867	positive regulation of cell activation	242	7	1.16153	6.02652	0.00014694	0.0174519	geneontology_Biological_Process_noRedundant	Cdkn1a;Plek;Ptprc;Clec4d;Hsph1;Nlrp3;Ccl5
GO:0009314	response to radiation	351	8	1.6847	4.74861	0.000247637	0.0262608	geneontology_Biological_Process_noRedundant	Per2;Per3;Cdkn1a;Clock;Slc7a11;Ptprc;Jun;Egfr
GO:0031072	heat shock protein binding	119	5	0.571167	8.75401	0.000255125	0.0262608	geneontology_Molecular_Function_noRedundant	Arntl;Hspa1b;Hspa1a;Dnajb1;Dnaja1
GO:0070371	ERK1 and ERK2 cascade	270	7	1.29592	5.40155	0.00028783	0.0277756	geneontology_Biological_Process_noRedundant	Epha4;Ccl9;Ptprc;Jun;Egfr;Ccl5;Fpr2
GO:0031349	positive regulation of defense response	276	7	1.32472	5.28412	0.000328924	0.029874	geneontology_Biological_Process_noRedundant	Clock;S100a9;Egfr;Cd14;S100a8;Pik3ap1;Ccl5
GO:0044389	ubiquitin-like protein ligase binding	282	7	1.35352	5.1717	0.000374615	0.0321336	geneontology_Molecular_Function_noRedundant	Per3;Hspa1b;Hspa1a;Cdkn1a;Jun;Egfr;Dnaja1
GO:0002694	regulation of leukocyte activation	385	8	1.84789	4.32926	0.000460974	0.0344712	geneontology_Biological_Process_noRedundant	Cdkn1a;Ptprc;Clec4d;Hsph1;Nlrp3;Zc3h12a;Ccl5;Samsn1
GO:0006457	protein folding	136	5	0.652762	7.65976	0.000472713	0.0344712	geneontology_Biological_Process_noRedundant	Hspa1b;Hspa1a;Dnajb1;Hsph1;Dnaja1
GO:0045862	positive regulation of proteolysis	294	7	1.41112	4.96061	0.000481286	0.0344712	geneontology_Biological_Process_noRedundant	Hspa1b;Hspa1a;S100a9;Epha4;Nlrp3;S100a8;Zc3h12a
GO:0022407	regulation of cell-cell adhesion	295	7	1.41592	4.94379	0.00049117	0.0344712	geneontology_Biological_Process_noRedundant	Il1rn;Adam19;Ptprc;Hsph1;Nlrp3;Zc3h12a;Ccl5
GO:0060326	cell chemotaxis	216	6	1.03674	5.78737	0.00056152	0.0362521	geneontology_Biological_Process_noRedundant	S100a9;Il1rn;Ccl9;S100a8;Ccl5;Fpr2
GO:0150076	neuroinflammatory response	34	3	0.163191	18.3834	0.000563504	0.0362521	geneontology_Biological_Process_noRedundant	Jun;Egfr;Fpr2
GO:0042303	molting cycle	81	4	0.388777	10.2887	0.000600905	0.0371119	geneontology_Biological_Process_noRedundant	Arntl;Clock;Igfbp5;Egfr
GO:0032103	positive regulation of response to external stimulus	222	6	1.06554	5.63096	0.000648685	0.0373627	geneontology_Biological_Process_noRedundant	Clock;S100a9;Egfr;S100a8;Ccl5;Fpr2
mmu05202	Transcriptional misregulation in cancer	146	5	0.700759	7.13512	0.000653363	0.0373627	pathway_KEGG	Per2;Cdkn1a;Mmp3;Birc3;Cd14
GO:0009914	hormone transport	225	6	1.07994	5.55588	0.000696035	0.0383814	geneontology_Biological_Process_noRedundant	Per2;Arntl;Clock;Il1rn;Egfr;Ccl5
GO:0051082	unfolded protein binding	85	4	0.407976	9.80449	0.00072101	0.0383876	geneontology_Molecular_Function_noRedundant	Hspa1b;Hspa1a;Dnajb1;Dnaja1
GO:0033674	positive regulation of kinase activity	416	8	1.99668	4.00664	0.000768122	0.0395327	geneontology_Biological_Process_noRedundant	Cdkn1a;Epha4;Il1rn;Ptprc;Egfr;Lcp2;Ccl5;Fpr2
mmu04141	Protein processing in endoplasmic reticulum	154	5	0.739157	6.76446	0.000831721	0.0414251	pathway_KEGG	Hspa1b;Hspa1a;Dnajb1;Hsph1;Dnaja1
GO:0031012	extracellular matrix	325	7	1.55991	4.48744	0.000872024	0.0420752	geneontology_Cellular_Component_noRedundant	Fbn1;Mmp3;Ptx3;Col5a3;Mmp13;Adam19;Fmod
GO:0034612	response to tumor necrosis factor	159	5	0.763156	6.55174	0.000960275	0.0440768	geneontology_Biological_Process_noRedundant	Ccl9;Birc3;Cd14;Zc3h12a;Ccl5
GO:0008277	regulation of G protein-coupled receptor signaling pathway	92	4	0.441574	9.0585	0.000970602	0.0440768	geneontology_Biological_Process_noRedundant	Plek;Arrdc3;Ccl5;Fpr2
GO:0051047	positive regulation of secretion	336	7	1.61271	4.34053	0.00105935	0.0456597	geneontology_Biological_Process_noRedundant	S100a9;Mmp13;Egfr;Cd14;Nlrp3;S100a8;Clec4e
GO:0002274	myeloid leukocyte activation	163	5	0.782354	6.39096	0.00107334	0.0456597	geneontology_Biological_Process_noRedundant	Clec4d;Jun;Lcp2;Ccl5;Fpr2
mmu04625	C-type lectin receptor signaling pathway	95	4	0.455973	8.77244	0.00109418	0.0456597	pathway_KEGG	Clec4d;Jun;Nlrp3;Clec4e
mmu04915	Estrogen signaling pathway	96	4	0.460773	8.68106	0.00113771	0.0458034	pathway_KEGG	Hspa1b;Hspa1a;Jun;Egfr
GO:0050900	leukocyte migration	250	6	1.19993	5.00029	0.00120313	0.0458034	geneontology_Biological_Process_noRedundant	S100a9;Il1rn;Ccl9;S100a8;Ccl5;Fpr2
GO:0048871	multicellular organismal homeostasis	344	7	1.6511	4.23959	0.00121453	0.0458034	geneontology_Biological_Process_noRedundant	Per2;Nr1d2;Arntl;Arrdc3;Il1rn;Egfr;Ccl5
GO:0042110	T cell activation	345	7	1.6559	4.2273	0.00123512	0.0458034	geneontology_Biological_Process_noRedundant	Ptprc;Clec4d;Hsph1;Nlrp3;Zc3h12a;Clec4e;Ccl5
GO:0050663	cytokine secretion	169	5	0.811153	6.16407	0.00126113	0.0458034	geneontology_Biological_Process_noRedundant	Lcp2;Cd14;Nlrp3;Zc3h12a;Clec4e
GO:0070555	response to interleukin-1	99	4	0.475172	8.418	0.00127561	0.0458034	geneontology_Biological_Process_noRedundant	Il1rn;Ccl9;Zc3h12a;Ccl5

## Sheet: Supplementary Table 3
Supplementary Table 3. Covariants data in human RNA-seq study.
Study.ID	Group	Samples.Collected	Age.on.DOS	Gender	Diabetes	Hypertension	Renal.Disease	Pulmonary.Disease	Smoker...At.any.time.in.the.past.	NYHA.classification.in.chart	Left.Ventricular.Ejection.Fraction	History.of.chronic.Atrial.Fibrillation	History.of.paroxysmal.Atrial.Fibrillation	Previous.MI.	Preop.Meds	CPB.Time	Cross.Clamp.Time..min.	CABG.Performed	Surgery.Date.
19V	Morning	09:34:00	48.58	Male	No DM	No	None	None	No	1	35	No	No	No	ACE Inhibitor,Digoxin,Beta Blocker,Diuretic,Aspirin,Statin	81	69	No	2009-08-20
20V	Morning	11:24:00	83.33	Male	No DM	Yes	CRI with sCr >1.5	None	Yes	3	30	Yes	Yes	No	ACE Inhibitor,Beta Blocker,Diuretic,Statin	138	114	Yes	2009-08-28
23V	Morning	11:46:00	76.42	Female	NIDDM with orals	Yes	None	COPD	No	3	60	No	No	No	Steroids in month prior to surgery,Bronchodilator,Statin	98	81	No	2009-10-14
32V	Morning	11:33:00	47	Female	No DM	Yes	None	COPD	Yes	2	65	No	No	No	Calcium Channel Blocker	109	68	No	2010-02-03
33V	Morning	10:32:00	66.42	Male	No DM	Yes	None	COPD	Yes	3	55	No	No	No	ACE Inhibitor,Bronchodilator,Calcium Channel Blocker,Aspirin,Statin	162	122	Yes	2010-02-12
34V	Morning	08:43:00	79	Female	No DM	Yes	None	None	No	3	60	No	No	No	ACE Inhibitor,Beta Blocker,Diuretic,Aspirin,Antibiotics,Statin	56	48	No	2010-03-01
41V	Morning	09:38:00	76.33	Male	No DM	Yes	None	None	Yes	2	65	No	No	No	Thyroxine,Beta Blocker,Statin	139	103	No	2010-05-19
44V	Morning	11:02:00	77.75	Male	NIDDM with orals	Yes	None	None	No	2	60	No	No	No	Angiotensin Receptor Blocker,Aspirin,Statin	80	67	No	2010-06-16
47V	Morning	11:46:00	62.67	Male	NIDDM with orals	Yes	None	None	Yes	3	55	No	No	No	Sotalol,Statin	140	108	Yes	2010-07-30
50V	Morning	11:18:00	75	Female	NIDDM with orals	Yes	None	None	No	3	55	No	No	No	Thyroxine,Beta Blocker,Non-ASA Platelet Inhibitors,Aspirin,Amiodarone,Statin	170	138	Yes	2010-08-20
51V	Morning	10:13:00	77	Female	IDDM	Yes	None	None	No	3	60	No	No	No	ACE Inhibitor,Beta Blocker,Calcium Channel Blocker,Aspirin,Statin	113	103	Yes	2010-09-14
52V	Morning	09:32:00	73.92	Female	IDDM	Yes	None	None	Yes	3	60	No	No	Yes	ACE Inhibitor,Beta Blocker,Non-ASA Platelet Inhibitors,Aspirin,Statin	143	67	No	2010-09-15
55V	Morning	09:19:00	85.42	Female	NIDDM with orals	Yes	None	COPD	Yes	3	60	Yes	No	No	Insulin,Antiarrhythmic,Bronchodilator,Beta Blocker,Calcium Channel Blocker,Diuretic	76	54	No	2010-10-28
56V	Morning	09:39:00	84.67	Female	NIDDM with orals	Yes	None	None	No	2	70	No	No	No	ACE Inhibitor,Beta Blocker,Calcium Channel Blocker,Diuretic,Aspirin,Statin	85	74	No	2010-11-01
57V	Morning	11:30:00	81.42	Male	No DM	Yes	None	None	Yes	3	55	No	No	No	Beta Blocker,Aspirin,Statin	189	150	Yes	2010-11-09
62V	Morning	11:26:00	81.42	Male	IDDM	Yes	None	Other	Yes	3	65	No	No	No	Insulin,ACE Inhibitor,Beta Blocker,Diuretic,Aspirin	78	61	No	2011-01-05
64V	Morning	11:31:00	50	Male	No DM	No	None	None	Yes	1	65	No	No	No	No	78	66	No	2011-01-26
65V	Morning	10:53:00	79.67	Male	NIDDM with orals	Yes	None	None	Yes	2	60	Yes	No	No	ACE Inhibitor,Calcium Channel Blocker,Amiodarone,Statin	145	113	Yes	2011-02-01
66V	Morning	10:06:00	51.42	Male	No DM	Yes	None	Asthma	Yes	1	55	No	No	No	Calcium Channel Blocker,Diuretic,Aspirin,Statin	180	101	No	2011-02-15
68V	Morning	10:33:00	63.67	Male	NIDDM with orals	Yes	CRI with sCr >1.5		No	3	60	No	No	No	ACE Inhibitor,Beta Blocker,Non-ASA Platelet Inhibitors,Diuretic,Aspirin,Fibrates,Statin	103	93	Yes	2011-03-24
69V	Morning	09:02:00	79.67	Female	No DM	Yes	None	COPD	No	3	70	No	No	No	Calcium,Angiotensin Receptor Blocker,Bronchodilator,Calcium Channel Blocker,Non-ASA Platelet Inhibitors,Diuretic,Statin	89	67	No	2011-03-22
71V	Morning	10:37:00	68.33	Female	No DM	Yes	None	N.A.	No	3	55	Yes	No	No	Beta Blocker,Calcium Channel Blocker,Warfarin,Diuretic,Statin	80	97	Yes	2011-04-12
74V	Morning	09:33:00	84.5	Male	No DM	Yes	None	None	Yes	2	55	No	No	No	Beta Blocker,Aspirin,Statin	79	68	No	2011-04-26
80V	Morning	10:32:00	81.5	Male	NIDDM with orals	Yes	CRI with sCr >1.5	COPD	Yes	3	50	No	Yes	Yes	Aspirin,Amiodarone,Statin	112	92	Yes	2011-08-15
92V	Morning	08:45:00	77	Female	No DM	Yes	None	COPD	No	3	65	No	No	No	Bronchodilator,Diuretic	57	50	No	2012-05-29
98V	Morning	10:14:00	73.42	Female	NIDDM with orals	Yes	None	None	Yes	2	60	No	No	No	Angiotensin Receptor Blocker,Diuretic,Aspirin,Statin	62	54	No	2012-08-09
99V	Morning	10:34:00	86.5	Female	No DM	Yes	None	None	No	2	65	No	No	No	Angiotensin Receptor Blocker,Calcium Channel Blocker,Aspirin	89	69	No	2012-12-04
100V	Morning	10:31:00	54.83	Male	No DM	No	None	None	No	2	60	No	No	No	Thyroxine,Statin	93	73	No	2012-10-23
102V	Morning	10:01:00	64.17	Male	NIDDM with orals	Yes	None	None	No	2	60	No	No	No	ACE Inhibitor,Beta Blocker,Diuretic,Aspirin,Niacin,Statin	101	91	Yes	2012-11-01
103V	Morning	11:01:00	86.42	Female	NIDDM with orals	Yes	None	None	Yes	2	55	No	No	No	Angiotensin Receptor Blocker,Beta Blocker,Non-ASA Platelet Inhibitors,Aspirin,Statin	101	91	Yes	2012-11-01
105V	Morning	10:25:00	77.42	Male	No DM	Yes	None	None	No	2	60	No	No	No	ACE Inhibitor,Warfarin,Statin	76	60	No	2012-11-13
107V	Morning	11:49:00	86.25	Male	No DM	Yes	None	None	Yes	3	65	No	No	No	Diuretic,Aspirin,Statin	72	65	Yes	2012-11-28
108V	Morning	09:43:00	87.33	Male	NIDDM with orals	Yes	None	None	Yes	2	60	Yes	Yes	No	Angiotensin Receptor Blocker,Beta Blocker,Warfarin,Aspirin,Statin	73	54	No	2013-01-04
110V	Morning	11:12:00	69.67	Male	IDDM	Yes	None	None	Yes	3	60	No	No	No	Insulin,ACE Inhibitor,Digoxin,Beta Blocker,Diuretic,Aspirin,Statin	114	92	Yes	2013-01-24
111V	Morning	10:24:00	69.42	Female	No DM	Yes	None	N.A.	Yes	2	70	No	No	No	ACE Inhibitor,Beta Blocker,Aspirin,Statin	75	59	No	2013-03-11
112V	Morning	10:14:00	56.33	Female	No DM	No	None	COPD,Asthma	Yes	3	65	No	No	No	No	85	60	No	2013-03-08
115V	Morning	11:13:00	66.75	Female	No DM	Yes	None	COPD	Yes	2	65	Yes	No	Yes	ACE Inhibitor,Beta Blocker,IV Nitrates,Heparin,Diuretic,Statin	62	48	No	2013-03-20
116V	Morning	10:59:00	79.42	Female	No DM	Yes	None	None	No	3	75	No	No	No	Thyroxine,ACE Inhibitor	71	61	Yes	2013-04-02
118V	Morning	09:47:00	71.33	Male	No DM	Yes	None	None	Yes	2	65	No	No	No	ACE Inhibitor,Beta Blocker,Diuretic,Statin	173	102	No	2013-06-03
123V	Morning	10:52:00	84.58	Female	No DM	Yes	None	None	Yes	2	65	No	No	No	ACE Inhibitor,Beta Blocker,Statin	114	62	Yes	2013-08-15
129V	Morning	11:07:00	77.58	Female	No DM	No	None	None	No		70	No	No	Yes	ACE Inhibitor,Beta Blocker,Aspirin,Statin	85	74	Yes	2013-10-31
130V	Morning	11:00:00	76.58	Female	No DM	Yes	None	None	No	3	65	No	No	No	Calcium Channel Blocker,Aspirin,Statin	86	74	Yes	2013-11-14
136V	Morning	10:00:00	78	Male	No DM	Yes	None	None	Yes	3	65	No	No	No	Beta Blocker,Diuretic,Aspirin,Statin	60	47	No	2014-02-24
138V	Morning	10:28:00	27.75	Male	No DM	No	None	None	No	2	65	No	No	No	No	97	88	No	2014-03-25
139V	Morning	09:49:00	58.75	Male	NIDDM with orals	Yes	None	None	Yes	2	60	No	No	No	ACE Inhibitor,Aspirin	79	69	Yes	2014-03-24
143V	Morning	11:02:00	62.58	Male	No DM	No	None	None	No	1	67	No	No	No	No	84	75	Yes	2014-04-17
144V	Morning	11:44:00	65.08	Male	No DM	Yes	None	None	No	2	66	No	No	No	Angiotensin Receptor Blocker,Beta Blocker,Aspirin	114	95	Yes	2014-04-21
145V	Morning	10:38:00	41.83	Male	No DM	No	None	None	No	Unknown	65	No	No	No	No	180	97	No	2014-04-24
150V	Morning	09:50:00	75.5	Female	No DM	No	None	None	No	2	50	No	No	No	Bronchodilator,Warfarin,Diuretic,Spironolactone,Aspirin,Statin	84	61	No	2014-05-16
151V	Morning	09:26:00	78.08	Female	No DM	Yes	None	None	No	3	60	No	No	No	Calcium,ACE Inhibitor,Beta Blocker,Calcium Channel Blocker,Diuretic,Aspirin,Statin	51	41	No	2014-05-20
152V	Morning	10:06:00	84.33	Male	No DM	Yes	None	None	Yes	3	65	Yes	No	No	Beta Blocker,Aspirin	95	81	No	2014-05-22
153V	Morning	09:49:00	62.83	Male	IDDM	No	None	None	Yes	2	50	No	No	NA	Insulin,ACE Inhibitor,Beta Blocker,Non-ASA Platelet Inhibitors,Warfarin,Aspirin,Statin	58	47	No	2014-05-27
157V	Morning	11:37:00	64	Male	NIDDM with orals	Yes	None	None	Yes	2	70	No	No	No	Beta Blocker,Diuretic,Aspirin,Statin	149	123	Yes	2014-06-24
160V	Morning	10:49:00	70.58	Male	No DM	Yes	None	None	Yes	2	70	No	No	No	ACE Inhibitor,Beta Blocker,Calcium Channel Blocker,Aspirin,Statin	97	77	Yes	2014-08-21
161V	Morning	10:26:00	37.33	Male	No DM	No	None	None	No		55	No	No	No	No	87	78	No	2014-09-02
164V	Morning	09:51:00	65.17	Female	No DM	No	None	COPD	Yes	2	55	No	No	No	Bronchodilator,Diuretic	76	46	No	2014-09-15
31V	Afternoon	15:57:00	90.17	Female	No DM	Yes	None	None	No	3	55	No	No	No	Thyroxine,Beta Blocker,Diuretic,Aspirin,Statin	115	87	Yes	2010-01-25
35V	Afternoon	17:15:00	65.58	Male	NIDDM with orals	Yes	None	None	No	3	25	Yes	No	No	Beta Blocker,Warfarin,Diuretic,Aspirin,Statin	122	105	Yes	2010-03-09
78V	Afternoon	15:14:00	68.92	Male	No DM	No	None	Other	Yes	3	65	No	No	No	Aspirin,Statin	64	49	No	2011-05-24
79V	Afternoon	17:55:00	74.67	Male	No DM	No	None	None	No	3	55	No	No	No	ACE Inhibitor,Bronchodilator,Aspirin,Amiodarone,Statin	157	129	Yes	2011-07-12
106V	Afternoon	17:47:00	83.67	Female	IDDM	Yes	None	None	No	3	NA	No	No	No	Angiotensin Receptor Blocker,Beta Blocker,Non-ASA Platelet Inhibitors,Diuretic,Aspirin,Statin	85	71	Yes	2012-11-13
109V	Afternoon	17:16:00	82.58	Male	No DM	Yes	None	None	No	2	80	Yes	No	No	ACE Inhibitor,Angiotensin Receptor Blocker,Warfarin,Diuretic,Statin	70	54	No	2013-01-22
114V	Afternoon	16:36:00	86.58	Male	No DM	Yes	None	None	Yes	3	NA	No	No	No	Thyroxine,Steroids in month prior to surgery,ACE Inhibitor,Bronchodilator,Aspirin	78	66	Yes	2013-03-20
120V	Afternoon	15:44:00	79.75	Male	NIDDM with orals	No	None	None	Yes	2	50	No	No	No	No	59	49	No	2013-06-11
126V	Afternoon	18:25:00	72.33	Female	NIDDM with orals	Yes	None	COPD	No	3	NA	No	No	No	Calcium Channel Blocker,Diuretic,Aspirin,Statin	112	92	Yes	2013-09-13
133V	Afternoon	17:24:00	58.58	Male	No DM	Yes	None	None	No	2	NA	No	No	No	ACE Inhibitor,Beta Blocker,Statin	138	90	Yes	2014-01-14
140V	Afternoon	15:22:00	67.08	Male	No DM	No	None	None	No	3	45	Yes	No	No	ACE Inhibitor,Beta Blocker,Diuretic	86	73	No	2014-03-25
141V	Afternoon	15:58:00	70.5	Male	No DM	Yes	None	None	Yes	3	60	No	No	Yes	ACE Inhibitor,Beta Blocker,Aspirin,Statin	68	53	No	2014-03-27
154V	Afternoon	16:17:00	81.25	Male	No DM	No	None	None	No	2	68	No	No	No	Aspirin,Statin	80	67	Yes	2014-06-12
156V	Afternoon	20:13:00	56.17	Male	No DM	No	None	None	No	2	65	No	No	No	Aspirin	227	195	Yes	2014-06-17
159V	Afternoon	15:06:00	76.25	Male	NIDDM with orals	Yes	None	Asthma,Other	No	3	60	No	No	No	Bronchodilator,Beta Blocker,Calcium Channel Blocker,Aspirin,Statin	88	68	No	2014-08-28
162V	Afternoon	18:59:00	49	Male	No DM	No	None	None	No	2	65	No	No	No	No	112	92	No	2014-09-08
163V	Afternoon	17:25:00	64.75	Female	No DM	No	None	None	Yes	2	70	No	No	No	No	76	56	No	2014-09-11

## Sheet: Supplementary Table 4
Supplementary Table 4. Full gene list in human RNA-seq study.
	baseMean	log2FoldChange	lfcSE	stat	pvalue	padj
PER3	1496.17	1.14806	0.128068	8.96444	3.11862e-19	1.07212e-14
BMAL1	269.468	-1.41344	0.191921	-7.36465	1.77608e-13	3.0529e-09
CIART	314.523	1.21226	0.176469	6.86954	6.44079e-12	7.38072e-08
PER2	552.545	0.779947	0.12111	6.44	1.19477e-10	1.02685e-06
TEF	1458.13	0.881486	0.138827	6.34953	2.15977e-10	1.48497e-06
NR1D1	1142.32	1.00634	0.170318	5.90858	3.4507e-09	1.69469e-05
NR1D2	1829.77	0.798393	0.142506	5.60251	2.11273e-08	9.07894e-05
PADI4	37.5628	-1.45777	0.297847	-4.89435	9.86288e-07	0.00339066
DBP	427.453	0.697326	0.14548	4.79328	1.64079e-06	0.00470059
SERPINE1	325.046	2.1485	0.469874	4.57249	4.81963e-06	0.011835
FCGR3B	129.604	-1.40496	0.30873	-4.55076	5.34514e-06	0.0122504
CCL19	20.0386	3.07991	0.689415	4.46742	7.91675e-06	0.0170101
COMMD3-BMI1	200.579	1.89466	0.426184	4.44564	8.76303e-06	0.0177209
APOBEC3A	49.7774	-1.27559	0.290814	-4.38626	1.15317e-05	0.0220242
COMP	99.1503	-2.20683	0.508417	-4.34058	1.42108e-05	0.0236489
RORC	901.091	-0.718617	0.165696	-4.33697	1.44461e-05	0.0236489
PGLYRP1	11.5571	-1.52822	0.354541	-4.31041	1.6295e-05	0.0254631
CEACAM3	14.7275	-1.22874	0.28815	-4.26425	2.00572e-05	0.0299793
PI15	11.7025	1.67798	0.409201	4.10061	4.12056e-05	0.0524654
HOXD8	22.1701	-1.58273	0.384798	-4.11314	3.90312e-05	0.0524654
RBM44	26.5641	1.00253	0.244155	4.1061	4.02392e-05	0.0524654
SELL	120.939	-1.07481	0.261867	-4.10443	4.05313e-05	0.0524654
ESM1	36.677	-1.81886	0.451387	-4.02948	5.59007e-05	0.0640584
CSF3R	577.898	-0.960896	0.239848	-4.00627	6.16848e-05	0.0674787
IDO1	85.9685	-1.13109	0.282631	-4.00199	6.28111e-05	0.0674787
HAS1	254.317	2.53454	0.636896	3.97951	6.90562e-05	0.0719398
DMRT2	12.2655	2.17495	0.560597	3.8797	0.000104583	0.0985196
LINGO4	71.5702	-0.827411	0.213451	-3.87635	0.000106034	0.0985196
CLDN4	24.4794	1.24376	0.321484	3.8688	0.00010937	0.0989454
TLL1	41.3162	1.34704	0.359943	3.74237	0.000182296	0.152853
RSPH10B	10.7548	1.24808	0.338402	3.68817	0.000225871	0.164562
SPRY4	1311.2	-0.420886	0.113908	-3.69495	0.000219927	0.164562
CCL14	249.742	1.63555	0.445444	3.67173	0.000240912	0.165642
MMP25	120.551	-0.709153	0.195675	-3.62413	0.000289938	0.172662
TACC1	4192.47	0.349591	0.0964503	3.62457	0.000289438	0.172662
GJB2	14.3755	1.29394	0.355044	3.64444	0.00026797	0.172662
SNTN	18.5923	1.10236	0.302509	3.64407	0.000268356	0.172662
SMIM11	358.359	-0.410499	0.113236	-3.62518	0.000288766	0.172662
INSRR	32.3741	-0.711065	0.200102	-3.55351	0.00038012	0.193047
CENPI	47.8907	0.886635	0.248772	3.56405	0.000365183	0.193047
CENPE	33.6878	1.34418	0.376741	3.56793	0.000359811	0.193047
CBX4	671	-0.325125	0.0917483	-3.54366	0.000394615	0.193047
MELK	13.8124	1.45327	0.410549	3.53981	0.000400411	0.193047
MRLN	19.0362	0.937004	0.265169	3.53361	0.000409926	0.193047
VNN2	77.6984	-0.816312	0.232937	-3.50444	0.000457574	0.200087
CXCR1	44.5513	-1.1697	0.3339	-3.50315	0.000459795	0.200087
MMP16	102.562	0.824371	0.237485	3.47126	0.000518024	0.206798
SNTG2	23.2805	0.998172	0.286937	3.47872	0.000503817	0.206798
GRM7	15.8584	1.58336	0.455442	3.47654	0.000507919	0.206798
DACH1	204.179	-0.518676	0.149533	-3.46863	0.000523117	0.206798
DPPA4	348.133	1.4284	0.41295	3.459	0.000542179	0.211807
UGGT1	1270.91	0.336268	0.0974223	3.45166	0.000557159	0.215214
IL10	22.7987	1.51806	0.440639	3.44513	0.000570779	0.218025
NIPAL1	33.4049	0.869612	0.254537	3.41645	0.000634442	0.225178
IFITM10	20.022	-1.18655	0.346429	-3.42508	0.000614629	0.225178
RARRES2	307.112	1.24145	0.363894	3.41158	0.000645881	0.226259
CXCL14	702.09	2.01588	0.596861	3.37748	0.000731543	0.231221
GABRB3	176.136	0.817165	0.241008	3.39061	0.000697367	0.231221
CYP4A11	14.3644	0.931369	0.274343	3.39491	0.000686518	0.231221
FARP2	719.125	0.228918	0.0684913	3.34229	0.000830901	0.237079
SYT1	22.4832	1.23644	0.371527	3.32798	0.00087477	0.237079
PKP1	23.7053	1.1665	0.350289	3.33012	0.000868085	0.237079
PADI2	51.5026	-0.772242	0.231477	-3.33614	0.000849495	0.237079
ENOX1	250.924	0.416387	0.125107	3.32824	0.000873979	0.237079
NCAPH	70.358	0.711032	0.213567	3.32932	0.000870598	0.237079
HLX	328.39	-0.521639	0.155868	-3.34667	0.000817883	0.237079
S100A12	23.0469	-1.52328	0.456165	-3.33932	0.000839829	0.237079
GREM1	83.1523	1.1198	0.336225	3.33052	0.000866839	0.237079
SYT9	14.1769	0.957376	0.287376	3.33144	0.000863968	0.237079
NTRK1	59.1461	-0.566424	0.169354	-3.34461	0.000823979	0.237079
MED12L	75.9455	0.87754	0.264821	3.31371	0.000920679	0.238789
NMT2	743.057	-0.227206	0.0684684	-3.3184	0.000905334	0.238789
FCAR	43.4197	-0.87351	0.263571	-3.31413	0.000919275	0.238789
CCDC38	22.9444	0.854784	0.259411	3.29509	0.000983895	0.246939
RRS1	354.442	-0.280836	0.0853321	-3.29109	0.000997998	0.246939
ADARB1	1158.23	-0.225709	0.0685844	-3.29096	0.000998457	0.246939
TREML2	21.0848	-0.723117	0.220164	-3.28445	0.00102183	0.247719
CEACAM4	11.5944	-0.921761	0.281415	-3.27545	0.00105495	0.248405
CCL21	735.92	1.75075	0.53448	3.2756	0.00105436	0.248405
MNDA	105.513	-0.962028	0.294275	-3.26915	0.00107871	0.250566
TRPS1	260.956	0.695096	0.213644	3.25353	0.00113982	0.257024
ENSG00000269825	72.0235	0.550735	0.170185	3.2361	0.00121173	0.262411
ENSG00000280571	1007.66	1.70859	0.52805	3.23565	0.00121366	0.262411
PPM1H	359.954	-0.414289	0.128597	-3.2216	0.00127478	0.270521
IGF1	523.041	1.1874	0.369766	3.21122	0.00132171	0.271223
CDK14	583.075	0.361815	0.112404	3.21887	0.00128697	0.271223
ZFHX4	157.542	0.711925	0.222866	3.19441	0.00140119	0.271223
BDKRB1	22.8858	1.52393	0.477335	3.19258	0.00141006	0.271223
EFHD1	986.801	0.358134	0.112098	3.19481	0.00139921	0.271223
UNC80	60.3139	0.737593	0.230258	3.20333	0.00135849	0.271223
ADAM8	142.839	-0.652666	0.203392	-3.20891	0.00133239	0.271223
RAB3C	23.6398	1.49293	0.464212	3.21605	0.00129969	0.271223
HOXD4	15.5816	-1.18298	0.368353	-3.21153	0.00132031	0.271223
CXCR2	92.5369	-0.89701	0.27992	-3.20452	0.00135288	0.271223
HOXD3	14.5938	-1.30088	0.408196	-3.18689	0.00143811	0.271646
CRY1	424.772	-0.354623	0.111582	-3.17813	0.00148228	0.27404
MUC16	429.176	2.32941	0.735853	3.16559	0.00154769	0.280033
ADGRG3	55.2784	-1.02679	0.324571	-3.16353	0.00155866	0.280542
SPATA5	218.087	0.319788	0.101334	3.15577	0.00160075	0.285649
TNFRSF10C	58.7295	-0.567437	0.179839	-3.15524	0.00160365	0.285649
MGST1	459.633	1.46053	0.463752	3.14937	0.00163625	0.287011
CPXM1	213.976	1.66641	0.529328	3.14816	0.00164301	0.287011
ZYG11A	18.3294	0.940719	0.298569	3.15076	0.00162849	0.287011
BLTP3B	401.02	0.373868	0.119226	3.13579	0.0017139	0.28769
DOCK11	230.626	0.978696	0.312976	3.12706	0.00176562	0.288273
BMP6	179.647	-0.580772	0.185743	-3.12675	0.00176751	0.288273
SMIM22	13.7613	0.788022	0.251562	3.13252	0.00173314	0.288273
LRP2	172.153	1.72711	0.557545	3.0977	0.00195027	0.2906
FOLH1	20.2608	1.01826	0.327847	3.1059	0.00189703	0.2906
TMC5	20.5715	0.998502	0.322803	3.09323	0.00197993	0.2906
GPM6A	29.4176	1.37303	0.440939	3.11387	0.0018465	0.2906
ACKR1	646.073	1.14792	0.369325	3.10816	0.00188255	0.2906
LIMS3	55.3823	0.72648	0.234435	3.09886	0.0019427	0.2906
RFLNB	741.866	-0.376438	0.12234	-3.07699	0.00209103	0.299523
FAM135B	21.6957	1.12167	0.365046	3.07267	0.00212152	0.301378
STEAP1	32.3864	1.34168	0.437094	3.06956	0.00214378	0.302044
ELOVL2	182.634	0.489237	0.159345	3.0703	0.00213846	0.302044
CRTAM	10.9691	1.03266	0.337273	3.06179	0.00220019	0.303071
TPO	414.309	0.562728	0.1836	3.06497	0.00217689	0.303071
OSTN	13.1743	1.43565	0.470275	3.05278	0.00226731	0.304583
AIPL1	10.347	1.01845	0.334279	3.0467	0.00231369	0.307104
SFRP2	179.499	1.9457	0.63887	3.04554	0.00232263	0.307105
ENSG00000235007	12.8824	0.900382	0.295816	3.04372	0.00233671	0.307783
SLC11A1	180.947	-0.782448	0.258664	-3.02496	0.00248665	0.315063
CLSPN	95.2798	0.725389	0.239856	3.02427	0.00249236	0.315063
SLCO4A1	241.089	0.639282	0.213984	2.98753	0.00281245	0.315063
IL18RAP	24.2047	-0.91579	0.306164	-2.99117	0.00277909	0.315063
LRAT	50.3444	1.30287	0.431947	3.01628	0.00255896	0.315063
CEP89	503.32	0.24533	0.0817762	3.00001	0.00269969	0.315063
PTGFR	129.709	1.18265	0.396885	2.97983	0.00288413	0.315063
ATP13A4	36.6222	0.96649	0.322488	2.99698	0.00272665	0.315063
QRICH2	195.267	-0.406554	0.13508	-3.00973	0.00261484	0.315063
GINS2	25.0076	0.675581	0.225315	2.99839	0.00271411	0.315063
RGS22	13.3569	1.06607	0.353078	3.01936	0.00253308	0.315063
USP37	286.34	0.460722	0.15468	2.97854	0.00289625	0.315063
HUNK	55.9334	0.681876	0.228854	2.97953	0.00288693	0.315063
LHX9	20.1673	1.2454	0.413731	3.01016	0.00261109	0.315063
CGN	120.929	1.51713	0.507109	2.99172	0.00277411	0.315063
TIAM1	105.562	0.645407	0.215753	2.99142	0.00277684	0.315063
XDH	18.696	1.05797	0.355192	2.97859	0.0028958	0.315063
CELF5	11.0705	0.817465	0.273471	2.98922	0.00279691	0.315063
COL4A3	550.466	0.409051	0.135964	3.00853	0.00262512	0.315063
HAS2	108.572	1.06558	0.356639	2.98785	0.00280947	0.315063
AKR1B15	36.5423	0.614954	0.205071	2.99874	0.00271103	0.315063
SIGLEC5	33.505	-0.882069	0.293488	-3.00547	0.00265174	0.315063
MEOX1	695.336	0.394474	0.133148	2.96268	0.00304977	0.316121
RIMBP2	10.65	1.68552	0.569469	2.95981	0.00307827	0.316121
BCL2L14	19.3595	0.919774	0.311777	2.9501	0.00317666	0.316121
OR7C1	101.858	0.744969	0.25236	2.95201	0.00315709	0.316121
ARHGEF4	89.9156	0.693389	0.234479	2.95715	0.00310496	0.316121
WDFY2	645.963	0.35152	0.118925	2.95582	0.00311842	0.316121
SLC26A7	16.1314	1.0995	0.370622	2.96664	0.00301076	0.316121
HMGA2	17.9663	0.956414	0.323108	2.96005	0.0030759	0.316121
TRPV6	15.4182	1.46782	0.495805	2.96048	0.00307165	0.316121
CKAP2L	32.6299	0.970995	0.328972	2.9516	0.0031613	0.316121
PRAG1	602.552	-0.394319	0.133087	-2.96287	0.00304789	0.316121
ARRDC3	693.954	0.341517	0.115903	2.94657	0.00321318	0.317141
NLRP10	40.8319	0.600755	0.204708	2.93468	0.00333887	0.31796
APOBR	120.971	-0.80288	0.273265	-2.93811	0.00330224	0.31796
TRIL	477.758	-0.383239	0.130494	-2.93684	0.00331576	0.31796
CDH1	32.4695	0.793349	0.271489	2.92222	0.00347548	0.323002
GINS1	68.6627	0.619655	0.213206	2.90637	0.0036565	0.323145
C1GALT1	610.712	0.325535	0.111678	2.91494	0.00355752	0.323145
IL6	120.606	1.54392	0.531204	2.90646	0.0036554	0.323145
CRABP2	58.5519	1.33017	0.455941	2.91742	0.00352943	0.323145
MEGF10	14.551	1.1411	0.39089	2.91923	0.00350899	0.323145
PDE6C	21.579	0.735638	0.253664	2.90005	0.00373106	0.327295
FMO1	49.0786	0.850404	0.293399	2.89845	0.00375011	0.328044
AADAC	36.9492	2.33144	0.80579	2.89336	0.00381149	0.330562
CT45A5	41.9629	0.786057	0.271645	2.89369	0.00380744	0.330562
IQCM	24.656	0.807819	0.27911	2.89427	0.00380043	0.330562
ADH1C	65.6205	0.874247	0.302227	2.89268	0.00381964	0.330562
GPRC5A	174.236	1.05693	0.36591	2.88851	0.00387072	0.331259
MYO9A	1258.26	0.304027	0.105329	2.88644	0.00389631	0.331259
COL5A3	2351.97	-0.459797	0.159537	-2.88207	0.00395075	0.331259
EHF	25.1755	0.824832	0.286725	2.87674	0.00401813	0.331259
SLC31A1	678.354	0.22174	0.0769885	2.88017	0.00397463	0.331259
PRKCA	634.993	0.373383	0.129441	2.88458	0.00391942	0.331259
BATF3	34.6911	0.628414	0.218674	2.87375	0.00405636	0.333611
PLD1	1890.22	0.288707	0.102056	2.82891	0.00467068	0.334377
PRORP	619.029	0.238422	0.0842623	2.82952	0.00466182	0.334377
SIRPB1	88.0448	-0.803261	0.280727	-2.86136	0.0042183	0.334377
HLF	1575.7	0.40219	0.140575	2.86103	0.00422266	0.334377
CTDSPL2	577.306	0.269026	0.0949189	2.83428	0.00459297	0.334377
ADIRF	1618	0.836348	0.293191	2.85257	0.00433672	0.334377
ADRA2A	85.2412	0.86728	0.305572	2.83822	0.00453659	0.334377
VTI1A	328.925	0.245111	0.0861176	2.84624	0.00442392	0.334377
FBXL13	27.5776	0.657647	0.230386	2.85454	0.0043099	0.334377
PIGR	16.7507	0.87919	0.308408	2.85073	0.00436184	0.334377
CCL11	56.0657	0.940968	0.329548	2.85533	0.00429923	0.334377
GAS1	631.378	0.969048	0.342235	2.83153	0.00463265	0.334377
RIPPLY3	12.0351	0.85778	0.301494	2.8451	0.00443974	0.334377
PNMA3	186.335	-0.659684	0.231412	-2.85068	0.00436253	0.334377
INCA1	99.6233	-0.243396	0.0857602	-2.8381	0.00453836	0.334377
OR11A1	19.7699	0.827051	0.291262	2.83954	0.00451784	0.334377
MT1A	19.9193	1.56802	0.547282	2.86511	0.00416866	0.334377
TCP10L	84.2668	0.536316	0.188575	2.84404	0.00445457	0.334377
PEG10	101.187	0.621204	0.219305	2.8326	0.00461714	0.334377
STMND1	17.8005	0.72561	0.256699	2.82669	0.00470317	0.335069
CLDN1	112.91	1.6283	0.578655	2.81395	0.00489374	0.340561
PCSK1	31.7209	0.556183	0.19744	2.81697	0.00484786	0.340561
RPS21	2665.05	0.979192	0.348258	2.81168	0.00492829	0.341582
BCAS1	24.4326	0.854185	0.305055	2.8001	0.00510864	0.341747
ORC1	15.4216	0.637844	0.227729	2.8009	0.00509608	0.341747
TMPRSS4	41.4314	0.718337	0.256799	2.79728	0.00515352	0.341747
ZBTB8A	262.593	0.323942	0.115775	2.79802	0.00514166	0.341747
SHOX2	28.5727	0.734303	0.261946	2.80326	0.00505883	0.341747
C17orf100	26.567	0.46806	0.166868	2.80497	0.00503208	0.341747
CRTAC1	142.752	-0.912484	0.326922	-2.79113	0.00525238	0.341803
ITGB6	74.9465	0.684002	0.245079	2.79095	0.00525539	0.341803
KLB	46.4019	1.26708	0.45385	2.79185	0.00524074	0.341803
WDR17	63.578	0.709477	0.254048	2.79269	0.00522724	0.341803
ELOVL6	121.044	0.528278	0.189042	2.79451	0.00519792	0.341803
SERPINA1	118.197	-0.741125	0.26557	-2.79069	0.00525958	0.341803
RPL36A-HNRNPH2	499.612	1.47972	0.529819	2.79287	0.00522421	0.341803
STON1	324.947	0.299172	0.107346	2.78699	0.00531996	0.343133
TRPM6	38.7868	0.763256	0.274138	2.7842	0.00536593	0.343567
MID2	188.252	0.420208	0.151021	2.78245	0.00539502	0.344601
CDC27	1574.11	0.468107	0.171462	2.73009	0.00633169	0.344885
TUBB1	41.5803	-0.789198	0.28978	-2.72343	0.0064607	0.344885
ZBTB16	6636.7	0.480021	0.17332	2.76956	0.00561315	0.344885
UMPS	339.195	0.321784	0.117083	2.74835	0.00598955	0.344885
RARRES1	133.112	1.31591	0.479617	2.74367	0.00607559	0.344885
PROX2	24.4075	0.748797	0.273833	2.7345	0.0062475	0.344885
WFDC3	20.3571	0.663939	0.243246	2.7295	0.00634307	0.344885
TNFSF9	11.9474	1.02454	0.375866	2.7258	0.00641453	0.344885
RGS13	15.6852	0.820118	0.301103	2.72371	0.00645531	0.344885
CPA4	116.811	1.58788	0.579772	2.7388	0.00616647	0.344885
CGNL1	1930.52	0.48299	0.175619	2.75021	0.00595569	0.344885
GFPT2	651.286	0.994036	0.359844	2.76241	0.00573771	0.344885
RNFT2	92.4688	0.533914	0.195076	2.73696	0.00620103	0.344885
RPL35	6526.83	0.806697	0.290425	2.77764	0.00547546	0.344885
LINS1	247.111	0.272479	0.0995014	2.73844	0.00617309	0.344885
KCNH1	20.5783	0.783638	0.283944	2.75983	0.00578313	0.344885
EPHA5	12.549	1.10982	0.40587	2.73441	0.00624913	0.344885
RSPO3	20.5372	1.07884	0.393215	2.74365	0.00607612	0.344885
TRIM50	11.0528	0.95443	0.344963	2.76676	0.00566169	0.344885
TMEM86A	351.647	-0.349573	0.126762	-2.75771	0.00582075	0.344885
SLC2A13	328.941	0.340208	0.123636	2.7517	0.00592877	0.344885
LPO	12.2493	0.941876	0.345239	2.72819	0.00636836	0.344885
RGPD8	320.929	0.469472	0.170257	2.75744	0.00582558	0.344885
ANKRD36C	285.981	0.472553	0.170978	2.76382	0.00571297	0.344885
RIMS2	59.9693	0.733496	0.266275	2.75466	0.00587532	0.344885
RPS27	12809.7	0.946119	0.345298	2.74001	0.00614369	0.344885
PER1	3998.61	0.483547	0.176353	2.74194	0.00610783	0.344885
CCL13	44.2862	1.63369	0.593673	2.75183	0.00592626	0.344885
YIPF6	1513.67	0.18947	0.0692535	2.73589	0.00622109	0.344885
C12orf56	11.0945	0.944172	0.346677	2.72349	0.00645954	0.344885
PLK5	19.4467	0.766031	0.280119	2.73466	0.00624451	0.344885
TMC3	17.1115	0.626179	0.227261	2.75533	0.00586327	0.344885
SPATS1	18.7882	0.866065	0.314584	2.75305	0.00590429	0.344885
HP	853.229	1.4583	0.529246	2.75543	0.00586152	0.344885
POTEB3	37.034	0.771853	0.277977	2.77668	0.00549176	0.344885
ENSG00000288637	42.8257	0.415359	0.151557	2.74061	0.00613254	0.344885
CTSK	611.824	0.796221	0.29248	2.72231	0.00648272	0.344989
MKI67	53.7817	0.994561	0.365676	2.71979	0.00653242	0.345012
MEIOC	51.0498	0.56014	0.205846	2.72116	0.00650533	0.345012
DDN	43.3642	-0.726005	0.267039	-2.71873	0.0065534	0.345012
PRG4	4011.7	1.70872	0.629276	2.71537	0.00662011	0.347832
DIAPH3	27.6311	0.840635	0.310107	2.71079	0.00671232	0.34919
KCNS3	159.107	-0.339915	0.125467	-2.7092	0.0067445	0.34919
SDC1	12.5668	1.07714	0.398385	2.70378	0.00685566	0.350199
KCNB1	294.112	0.562072	0.207776	2.70518	0.00682668	0.350199
TNN	35.4174	0.736147	0.272556	2.7009	0.00691513	0.350617
FANCI	167.573	0.435126	0.161352	2.69675	0.00700188	0.350617
SLIT2	455.397	0.49468	0.183346	2.69806	0.00697444	0.350617
PTGES	66.0974	0.855576	0.316891	2.69991	0.00693586	0.350617
SRP72	1580.51	0.22096	0.0819246	2.69711	0.00699433	0.350617
DLG2	403.324	0.422308	0.156781	2.69361	0.00706832	0.352166
PREX1	833.61	-0.366241	0.13611	-2.69076	0.00712885	0.352938
PCDH10	13.6191	-1.02661	0.382363	-2.68492	0.00725474	0.352938
ATXN7	747.86	0.32391	0.120541	2.68715	0.00720656	0.352938
IQUB	12.3805	0.847859	0.315551	2.68692	0.00721148	0.352938
VAT1L	1016.86	0.524744	0.19492	2.6921	0.00710031	0.352938
ERCC6L	15.0196	0.550519	0.204907	2.68667	0.00721673	0.352938
EBLN2	51.4824	0.444659	0.165617	2.68486	0.00725602	0.352938
DNAL1	405.548	0.402915	0.150126	2.68385	0.00727791	0.35339
HCFC2	473.496	0.273033	0.1018	2.68205	0.00731718	0.354736
COL10A1	26.8273	-1.01431	0.379345	-2.67384	0.00749872	0.356099
STEAP2	559.193	0.427875	0.159958	2.67492	0.00747472	0.356099
MFSD4B	687.566	0.474654	0.177404	2.67556	0.00746044	0.356099
CFB	854.868	1.24753	0.46641	2.67474	0.00747863	0.356099
ITCH	1167.49	0.228596	0.0856979	2.66746	0.00764267	0.356655
MPP2	1019.74	-0.391381	0.146833	-2.66548	0.00768789	0.356655
PRELID2	119.654	0.49286	0.184755	2.66763	0.00763877	0.356655
RYR3	90.3022	0.647631	0.242911	2.66613	0.00767308	0.356655
CNOT2	1154.33	0.181057	0.0682822	2.6516	0.00801106	0.357227
TM4SF19	27.4445	1.16284	0.437959	2.65514	0.00792744	0.357227
VEGFC	354.632	-0.362714	0.136688	-2.65359	0.00796416	0.357227
ATG10	220.937	0.26244	0.0987339	2.65806	0.00785929	0.357227
SLC6A20	27.4482	0.865327	0.325212	2.66081	0.00779538	0.357227
HSD11B2	45.7995	0.630591	0.23711	2.65949	0.00782602	0.357227
PNMA2	140.435	0.538453	0.202361	2.66086	0.00779412	0.357227
NFIL3	635.915	-0.321455	0.121421	-2.64744	0.00811034	0.357917
FMN2	22.4447	1.02912	0.388813	2.64683	0.00812511	0.358109
SIDT1	81.3448	0.457406	0.173027	2.64355	0.00820404	0.358721
PRKAG3	16.8258	0.676028	0.255741	2.64341	0.00820757	0.358721
SLC7A9	10.1986	0.789809	0.301029	2.62369	0.00869817	0.359071
CTTNBP2	70.6567	0.546538	0.208298	2.62383	0.00869463	0.359071
PCDH12	1574.21	-0.281481	0.107112	-2.62792	0.00859082	0.359071
GADD45A	1369.61	-0.290115	0.110488	-2.62576	0.00864548	0.359071
HELLS	89.4116	0.591157	0.224188	2.63688	0.00836718	0.359071
FAM124B	70.9446	-0.506618	0.19196	-2.63918	0.00831069	0.359071
SNAP25	144.336	0.615774	0.234924	2.62116	0.00876305	0.359071
KIF20B	163.73	0.392482	0.149543	2.62454	0.0086767	0.359071
PIK3R1	7933.08	0.36543	0.138949	2.62997	0.0085393	0.359071
FRMPD3	18.2729	0.617834	0.235787	2.62031	0.00878496	0.359071
C2orf50	62.0341	0.568253	0.215151	2.64118	0.00826184	0.359071
AP1S3	87.3727	0.500091	0.189699	2.63624	0.00838298	0.359071
PTPN13	280.999	0.496468	0.18879	2.62974	0.0085451	0.359071
MFSD8	456.586	0.283702	0.107858	2.63033	0.00853017	0.359071
OR1M1	26.0252	0.641689	0.244809	2.62118	0.00876254	0.359071
DPY19L3	330.893	0.363688	0.138656	2.62295	0.00871715	0.359071
MAP3K15	21.1002	0.690488	0.262658	2.62885	0.00856744	0.359071
KCTD16	20.4425	0.898034	0.341431	2.63021	0.00853326	0.359071
KCNK12	46.8237	0.644049	0.244089	2.63858	0.00832531	0.359071
TMSB15C	25.901	0.574028	0.219038	2.62068	0.00877554	0.359071
PKD1L3	15.9513	0.86938	0.329474	2.63869	0.00832264	0.359071
POTEI	29.7259	0.76915	0.29363	2.61945	0.00880707	0.359157
CENPM	22.5883	0.768519	0.294187	2.61235	0.00899222	0.360574
TENT5B	989.391	0.567362	0.216858	2.61629	0.0088891	0.360574
SLC1A7	106.381	0.714636	0.27363	2.61169	0.00900963	0.360574
MYORG	638.749	0.228201	0.0872817	2.61454	0.00893482	0.360574
SLC22A25	226.504	0.554594	0.212051	2.61538	0.00891285	0.360574
NLRP2	29.3739	0.669723	0.256846	2.60749	0.00912086	0.361871
IL1R2	22.1027	-0.86012	0.33009	-2.60571	0.00916836	0.361871
SOX5	81.5628	0.500451	0.191922	2.60758	0.0091186	0.361871
ANXA8L1	181.003	1.98034	0.75989	2.60609	0.00915827	0.361871
CCL24	34.9004	0.88282	0.339198	2.60267	0.00925017	0.362189
TOP2A	57.1626	0.940644	0.36123	2.604	0.00921428	0.362189
SEC14L4	10.1538	0.782734	0.300729	2.60279	0.00924687	0.362189
KCNG4	19.2002	0.711833	0.273342	2.60418	0.00920944	0.362189
PCDHAC2	66.137	0.744803	0.285941	2.60475	0.0091942	0.362189
CCDC80	9691.69	0.886424	0.340815	2.6009	0.009298	0.362869
DNAAF4	30.3924	0.534414	0.205614	2.59912	0.00934637	0.363325
SERPINB10	11.3679	0.781674	0.301147	2.59566	0.00944105	0.363454
CD1C	36.9365	0.886722	0.341955	2.59309	0.00951174	0.364543
ZNF595	233.328	0.50802	0.195857	2.59383	0.00949138	0.364543
MAK	36.6884	0.461496	0.178386	2.58707	0.00967966	0.366051
CCNE2	43.2367	0.473173	0.182879	2.58736	0.00967138	0.366051
BICC1	361.319	0.484344	0.187464	2.58366	0.0097758	0.367694
TRIO	2711	0.24215	0.0943302	2.56705	0.0102567	0.368177
PDCD7	637.55	-0.178254	0.0691925	-2.57621	0.00998903	0.368177
RAD51AP1	22.918	0.533378	0.207506	2.57042	0.0101575	0.368177
TGIF2	295.308	-0.209843	0.0816431	-2.57024	0.0101627	0.368177
SAG	98.11	0.660414	0.256343	2.57628	0.00998683	0.368177
LYVE1	951.441	1.01406	0.395036	2.567	0.0102582	0.368177
AKIRIN2	864.982	-0.201521	0.0780906	-2.5806	0.00986287	0.368177
FAM13A	808.433	0.219614	0.0853799	2.57219	0.0101057	0.368177
TMEM50B	1492.5	-0.205133	0.0799051	-2.5672	0.0102523	0.368177
GABRB2	46.3192	0.64918	0.252512	2.57089	0.0101437	0.368177
CBR3	56.9173	0.485128	0.188904	2.56811	0.0102254	0.368177
WDR41	706.56	0.211111	0.0818098	2.58051	0.00986553	0.368177
GCSAML	27.84	0.692078	0.268683	2.57582	0.0100002	0.368177
TMEM151A	41.0238	1.83363	0.712107	2.57493	0.0100261	0.368177
RPS29	7809.6	0.866242	0.336814	2.57187	0.0101151	0.368177
SPATA31C1	11.2532	0.751414	0.292123	2.57225	0.010104	0.368177
ENSG00000284732	16.0955	0.783369	0.304184	2.57531	0.010015	0.368177
KIF18A	17.9684	0.728468	0.284279	2.56251	0.010392	0.369447
C4orf33	133.255	0.296374	0.115637	2.56296	0.0103785	0.369447
RTL1	14.083	0.884669	0.345152	2.56313	0.0103734	0.369447
SLC6A15	32.3657	0.828682	0.323604	2.56079	0.0104435	0.369767
CXCL1	61.4047	1.28492	0.501966	2.55977	0.0104742	0.370456
INSL6	22.1391	0.777916	0.304022	2.55875	0.010505	0.370781
RGS1	54.4774	1.42587	0.557997	2.55533	0.0106088	0.372534
ADH1B	2098.4	0.80758	0.315998	2.55564	0.0105991	0.372534
TFPI	915.684	0.340412	0.134354	2.5337	0.0112867	0.373062
BEST2	14.8899	0.588332	0.234008	2.51416	0.0119317	0.373062
FGF10	51.77	0.764515	0.301283	2.53753	0.0111638	0.373062
CDH19	1022.94	0.47999	0.190778	2.51596	0.0118709	0.373062
MAP3K13	409.847	0.250727	0.0988973	2.53522	0.0112376	0.373062
RIF1	699.309	0.296663	0.116774	2.5405	0.0110695	0.373062
RBL1	193.973	0.352957	0.13874	2.54401	0.0109589	0.373062
TFAP2C	16.573	0.840039	0.331863	2.53128	0.0113648	0.373062
FERMT1	75.4152	0.558301	0.220282	2.53448	0.0112614	0.373062
AQP9	70.3768	-1.02979	0.40905	-2.51751	0.0118188	0.373062
NIPAL2	507.787	0.252994	0.100368	2.52066	0.0117134	0.373062
CFAP69	255.775	0.472585	0.185875	2.54248	0.0110069	0.373062
PHF14	632.129	0.239529	0.0941693	2.54359	0.0109719	0.373062
GLIS3	118.962	0.44058	0.175234	2.51424	0.0119289	0.373062
SPR	811.694	-0.296516	0.116772	-2.53928	0.0111082	0.373062
OSCP1	140.361	0.236281	0.0936399	2.52329	0.0116262	0.373062
SENP5	753.073	0.186237	0.0741764	2.51073	0.0120482	0.373062
GPR75	47.0932	0.386782	0.152956	2.52871	0.0114483	0.373062
ABCC11	48.9486	0.723534	0.28444	2.54371	0.0109681	0.373062
CENPK	41.0682	0.577051	0.229139	2.51835	0.0117908	0.373062
C3	20047.8	1.05596	0.417822	2.52729	0.0114946	0.373062
SRD5A3	229.606	0.304174	0.120781	2.5184	0.011789	0.373062
FGF13	240.63	0.563109	0.223464	2.51991	0.0117385	0.373062
TBC1D8B	343.947	0.425585	0.169468	2.5113	0.0120289	0.373062
BMPR1B	81.0205	0.643587	0.2565	2.50911	0.0121036	0.373062
ATP6V1C2	68.1916	-0.532646	0.210881	-2.52581	0.0115432	0.373062
PHIP	2089	0.220494	0.0867862	2.54065	0.0110645	0.373062
TEX9	103.225	0.476737	0.189595	2.51451	0.0119199	0.373062
ABI3BP	1438.77	0.55443	0.218309	2.53965	0.0110963	0.373062
PTCHD1	51.9302	0.590796	0.234354	2.52096	0.0117036	0.373062
SCN11A	28.539	0.790128	0.313847	2.51756	0.0118172	0.373062
MRAP	11.2096	2.10348	0.824285	2.55188	0.0107143	0.373062
NPAS2	1592.53	-0.302094	0.119791	-2.52183	0.0116746	0.373062
FPR1	89.0998	-0.821353	0.324346	-2.53234	0.0113305	0.373062
DENND4A	556.467	0.30069	0.119002	2.52675	0.0115123	0.373062
COL25A1	33.657	0.775746	0.304118	2.55081	0.0107474	0.373062
SLC4A5	184.664	0.457664	0.182322	2.5102	0.0120664	0.373062
ZNF676	130.182	0.469375	0.18406	2.55012	0.0107687	0.373062
MAML3	268.162	-0.254276	0.101015	-2.51721	0.0118289	0.373062
CFAP43	12.1509	0.87306	0.343127	2.54442	0.0109458	0.373062
LILRB3	116.692	-0.711172	0.281701	-2.52457	0.0115841	0.373062
FOXL2NB	86.0199	0.567895	0.225337	2.5202	0.0117289	0.373062
CROCC2	10.5246	0.818289	0.32159	2.54451	0.010943	0.373062
ERVW-1	249.026	0.447573	0.175836	2.5454	0.0109152	0.373062
DNAAF10	348.309	0.156504	0.0612983	2.55316	0.0106751	0.373062
NDUFC2-KCTD14	164.572	1.01967	0.400996	2.54285	0.0109951	0.373062
TTC26	84.9377	0.36742	0.146584	2.50654	0.0121918	0.37389
MT1G	10.3152	1.2302	0.490918	2.50591	0.0122138	0.37423
G6PC1	27.7793	0.599449	0.239322	2.50478	0.0122528	0.374425
BLNK	103.138	0.550146	0.219992	2.50076	0.0123927	0.374428
RASA4	456.296	0.631797	0.252501	2.50216	0.0123438	0.374428
UPK1B	79.1194	1.31181	0.524769	2.49978	0.012427	0.374428
GABRB1	110.093	0.59053	0.236233	2.49978	0.0124272	0.374428
SSR1	2283.05	0.237377	0.0949922	2.49891	0.0124574	0.374733
OR2G6	42.8156	0.611847	0.24485	2.49887	0.0124591	0.374733
BIRC5	31.1186	0.889688	0.356442	2.49603	0.0125594	0.375775
NXNL2	68.6246	0.615297	0.246681	2.4943	0.0126204	0.375966
CC2D2A	408.9	0.26537	0.106498	2.49178	0.0127106	0.376369
RPL38	10875.8	0.848663	0.340798	2.49022	0.0127664	0.376723
FOXO3	2365.57	0.231556	0.0932014	2.48447	0.0129743	0.37687
FLT3	13.1335	0.984805	0.396631	2.48292	0.0130309	0.37687
FCRL2	32.2261	0.653115	0.262975	2.48357	0.0130073	0.37687
GALNT6	83.3785	0.636261	0.255973	2.48566	0.0129312	0.37687
REL	279.108	0.375646	0.151003	2.48767	0.0128585	0.37687
TGFA	49.9112	-0.657189	0.264756	-2.48224	0.0130559	0.37687
STOX1	15.2993	0.771891	0.310375	2.48696	0.0128839	0.37687
TNFSF15	20.5074	0.690213	0.277603	2.48633	0.0129068	0.37687
SEC14L3	10.6089	0.730316	0.295118	2.47466	0.0133363	0.377515
CRIP3	418.471	-0.657511	0.265649	-2.47512	0.0133193	0.377515
FAM83A	21.1987	0.780033	0.315448	2.47277	0.0134069	0.377515
CCDC138	38.3278	0.493279	0.19988	2.46788	0.0135916	0.377515
PROK2	11.5181	-1.01817	0.410972	-2.47746	0.0132322	0.377515
FSTL1	8042.09	0.425088	0.171596	2.47726	0.0132395	0.377515
TSHR	130.356	0.558486	0.225976	2.47144	0.0134571	0.377515
SKA3	11.4039	0.887241	0.358764	2.47305	0.0133965	0.377515
FPR2	24.8539	-0.838334	0.338409	-2.47728	0.0132388	0.377515
LCLAT1	1356.81	0.339308	0.137291	2.47145	0.0134566	0.377515
NT5C1B	30.4902	0.435194	0.175543	2.47913	0.0131702	0.377515
FAM43A	849.84	-0.273386	0.110685	-2.46993	0.0135138	0.377515
OR7A17	29.8417	0.64214	0.25948	2.47472	0.0133341	0.377515
CIDEC	215.069	1.8876	0.762159	2.47665	0.0132623	0.377515
PINLYP	82.7505	0.459472	0.186167	2.46806	0.0135847	0.377515
FMN1	78.3472	0.662297	0.268291	2.46858	0.0135651	0.377515
TMEM63C	135.697	-0.777159	0.315048	-2.46679	0.0136329	0.378266
CFHR2	10.9143	0.991058	0.401958	2.46557	0.0136794	0.378777
EFNA5	999.889	0.272725	0.110673	2.46425	0.0137301	0.379378
DCHS2	35.9619	0.715934	0.290556	2.46401	0.0137392	0.379378
CILP2	25.9359	0.950928	0.386025	2.46339	0.0137632	0.379452
SMPDL3B	15.8765	1.2978	0.526927	2.46296	0.0137797	0.379582
XRN1	722.087	0.377905	0.153749	2.45794	0.0139735	0.382934
LRRIQ1	21.4869	0.726235	0.2955	2.45765	0.0139851	0.382934
MED1	769.361	0.299125	0.121837	2.45512	0.0140836	0.383776
NR2C2	337.914	0.302184	0.123103	2.45472	0.0140994	0.383776
PHACTR4	1289.16	0.133895	0.0545796	2.45321	0.0141586	0.384435
H4C3	26.9872	1.38339	0.564141	2.4522	0.0141985	0.384949
CSMD3	54.4286	0.64589	0.263429	2.45186	0.014212	0.385012
SGMS2	604.194	0.310966	0.126871	2.45104	0.0142444	0.38558
LGALS3	3177.37	0.265123	0.108263	2.44887	0.0143304	0.386006
LFNG	321.456	0.51734	0.211707	2.44366	0.0145391	0.388524
JAML	175.667	-0.494672	0.202443	-2.44351	0.0145451	0.388524
PALS2	122.615	0.677215	0.277585	2.43967	0.0147009	0.389658
RHBDL3	28.9152	0.942273	0.386207	2.43981	0.0146949	0.389658
RPL36A	2375.9	0.966572	0.396242	2.43935	0.0147137	0.389698
NCAPG2	198.793	0.248512	0.101922	2.43826	0.0147583	0.390026
THRB	697.512	0.306255	0.125691	2.43657	0.0148271	0.390324
IL17RA	771.008	-0.274029	0.112466	-2.43655	0.0148282	0.390324
CAMKK1	254.164	0.342621	0.140714	2.43488	0.0148968	0.391831
KDM5B	744.343	0.238521	0.0979996	2.43389	0.0149374	0.392281
PATE4	12.6331	0.693401	0.284926	2.43362	0.0149487	0.392281
SLC11A2	927.218	0.207224	0.0851921	2.43243	0.014998	0.392396
CFAP221	58.8107	0.387602	0.159399	2.43164	0.0150305	0.392643
TBC1D19	154.189	0.250488	0.103067	2.43035	0.0150842	0.392791
FRMD4B	686.992	0.398615	0.164562	2.42228	0.0154233	0.392791
SWT1	279.629	-0.169192	0.0697228	-2.42664	0.0152394	0.392791
SYT4	54.2003	2.2866	0.943515	2.42349	0.0153721	0.392791
TROAP	32.8335	0.732917	0.302301	2.42446	0.0153311	0.392791
SRSF12	29.4839	0.496662	0.205081	2.42179	0.0154444	0.392791
DNAAF8	26.0053	0.470598	0.194019	2.42552	0.0152864	0.392791
A2ML1	33.5572	0.612076	0.252716	2.42199	0.0154356	0.392791
P2RY12	20.9871	0.793982	0.327204	2.42657	0.0152424	0.392791
ADGRG2	68.4316	0.581576	0.239832	2.42493	0.0153113	0.392791
SAMD12	611.502	0.433084	0.178536	2.42576	0.0152765	0.392791
CACNB4	92.1305	0.535778	0.220724	2.42737	0.0152087	0.392791
GNAZ	159.902	-0.345299	0.142629	-2.42096	0.0154794	0.393313
TENM1	52.6977	0.512228	0.211676	2.41987	0.0155262	0.393375
FAM227A	143.91	0.455612	0.188331	2.41921	0.0155544	0.393375
POLI	512.064	0.194527	0.0804565	2.41779	0.0156149	0.39416
KLK1	25.8992	1.03622	0.428865	2.41618	0.0156842	0.394722
MSH6	1142.59	0.153401	0.0635075	2.41548	0.0157144	0.394792
SCD	1463.59	1.28423	0.532066	2.41367	0.0157929	0.395145
HTR3B	56.5658	0.524644	0.217446	2.41276	0.0158323	0.395594
RASGRP4	119.336	-0.543921	0.225439	-2.41272	0.0158341	0.395594
CHRDL1	445.296	1.11974	0.464359	2.41137	0.0158926	0.395605
BHLHE41	902.67	0.270888	0.112366	2.41077	0.0159187	0.395605
WDR36	462.107	0.257657	0.106866	2.41104	0.0159071	0.395605
DCDC1	15.9489	0.884362	0.366684	2.41178	0.0158747	0.395605
AKR1D1	13.2218	1.04048	0.431953	2.40878	0.0160058	0.396145
KSR2	19.1267	0.59085	0.245586	2.40587	0.0161339	0.397031
TERB1	12.9612	0.738424	0.306833	2.40659	0.016102	0.397031
LRRN3	98.5401	0.633837	0.263635	2.40422	0.016207	0.397691
RPS26	2202.61	0.802888	0.333867	2.40482	0.0161806	0.397691
FAM9C	86.2682	1.01867	0.423758	2.4039	0.0162211	0.397754
FNIP2	1619.31	0.288662	0.120227	2.40098	0.0163511	0.397807
FADS2	1069.22	0.315164	0.13125	2.40124	0.0163396	0.397807
G3BP1	3372.08	0.172273	0.0717517	2.40097	0.0163519	0.397807
FBXO4	125.864	0.237261	0.0988688	2.39975	0.0164061	0.397807
CALB2	94.517	1.42853	0.594744	2.40193	0.016309	0.397807
LEP	152.501	1.47493	0.613771	2.40306	0.0162586	0.397807
ANXA8	280.648	1.64883	0.686769	2.40085	0.0163569	0.397807
SULT1C2	261.73	-0.581421	0.242417	-2.39844	0.0164652	0.39806
TMEM140	1123.75	-0.215917	0.0900496	-2.39776	0.0164958	0.39824
NOP16	400.85	-0.17522	0.0735044	-2.3838	0.0171347	0.39841
IFT74	266.55	0.22472	0.0940551	2.38923	0.0168836	0.39841
KCNA7	51.7886	-0.456857	0.192551	-2.37266	0.0176606	0.39841
ICAM5	16.4847	0.757492	0.319114	2.37373	0.0176092	0.39841
ARHGAP21	2397.18	0.171396	0.071716	2.38993	0.0168515	0.39841
MS4A4A	305.883	0.805067	0.336113	2.39522	0.0166102	0.39841
SEMA5A	1779.68	0.347135	0.146237	2.37379	0.0176067	0.39841
ARHGEF26	148.575	0.351416	0.14707	2.38945	0.0168737	0.39841
SLC39A11	143.875	0.342712	0.143702	2.38488	0.0170847	0.39841
BHLHE40	1753.66	0.402535	0.168734	2.38562	0.0170505	0.39841
SAA2	11.975	0.894319	0.376857	2.3731	0.0176397	0.39841
RAB30	733.358	0.247487	0.104111	2.37714	0.0174473	0.39841
CYP1B1	749.645	0.568654	0.238149	2.38781	0.0169493	0.39841
CYP1A2	43.2555	0.458734	0.191387	2.39689	0.0165347	0.39841
GRM1	269.315	0.644286	0.270341	2.38324	0.0171612	0.39841
KCNJ15	78.9943	-0.630598	0.263831	-2.39016	0.0168412	0.39841
HPGD	48.761	0.665188	0.278233	2.39076	0.0168136	0.39841
ARFIP1	456.606	0.215994	0.0909994	2.37358	0.0176168	0.39841
WDR72	26.5563	0.726792	0.303618	2.39377	0.016676	0.39841
GSDMA	28.0802	0.930793	0.391038	2.38031	0.0172979	0.39841
BNC1	109.966	1.27494	0.535786	2.37957	0.0173329	0.39841
KLF13	3560.31	0.196719	0.0820773	2.39675	0.0165413	0.39841
NEUROD2	20.9914	0.816984	0.342829	2.38307	0.017169	0.39841
ID4	370.755	0.941538	0.395838	2.37859	0.0173788	0.39841
SCN8A	116.554	0.509198	0.212806	2.39278	0.0167214	0.39841
TRIM33	1325.73	0.231822	0.0974026	2.38003	0.017311	0.39841
CYP2F1	12.8322	0.665787	0.278939	2.38686	0.0169931	0.39841
IGFL4	293.869	0.500058	0.21079	2.3723	0.0176778	0.39841
KRT222	11.1678	1.14836	0.480705	2.3889	0.0168988	0.39841
CPEB1	145.86	0.413399	0.174129	2.37409	0.0175921	0.39841
ZBED6	90.4885	1.42827	0.599388	2.38289	0.0171774	0.39841
ERVV-2	10.5107	0.779993	0.325534	2.39604	0.0165733	0.39841
TADA2A	295.187	0.215646	0.0900862	2.39377	0.016676	0.39841
ENSG00000283208	19.8772	0.494584	0.207693	2.38132	0.0172509	0.39841
EXOC3L2	150.837	-0.475481	0.198763	-2.3922	0.0167477	0.39841
RAB27B	16.3732	1.18882	0.501554	2.37027	0.017775	0.398723
DEPDC5	546.145	0.245707	0.103638	2.37082	0.0177485	0.398723
ANO7	80.7453	0.299366	0.126397	2.36845	0.0178626	0.398723
GLT1D1	21.8692	-0.773833	0.326703	-2.36861	0.0178548	0.398723
ZNF66	128.034	0.513288	0.216668	2.36901	0.0178357	0.398723
TLCD3A	135.562	0.283405	0.11964	2.36881	0.0178452	0.398723
SHISAL2A	102.129	-0.445151	0.187959	-2.36834	0.0178682	0.398723
GADL1	65.6772	0.420241	0.177541	2.36701	0.0179327	0.39954
SLC7A14	50.6609	0.61295	0.259067	2.36599	0.0179818	0.399671
C12orf50	122.369	0.534546	0.225935	2.36593	0.0179851	0.399671
PLEKHG6	21.6453	0.849153	0.358946	2.36569	0.0179967	0.399672
KCNH3	43.4861	0.490436	0.207354	2.36522	0.0180195	0.399919
GEMIN2	137.108	0.290603	0.123071	2.36126	0.0182129	0.400334
TIMM10B	477.727	-0.200991	0.0850544	-2.36308	0.0181236	0.400334
HNMT	378.752	0.442842	0.187426	2.36275	0.0181398	0.400334
TOP3A	498.103	0.206266	0.087378	2.36062	0.0182446	0.400334
METTL7A	696.002	0.458185	0.194025	2.36148	0.0182021	0.400334
PYROXD2	731.329	-0.244977	0.10392	-2.35736	0.0184053	0.401541
ZNF562	660.425	0.270538	0.114835	2.3559	0.018478	0.401541
HEG1	8303.35	0.278078	0.118027	2.35606	0.0184702	0.401541
LITAF	1947.95	-0.316327	0.134267	-2.35595	0.0184755	0.401541
PLK4	38.8527	0.56731	0.241287	2.35118	0.0187139	0.402709
PLEKHS1	23.9963	0.492257	0.209374	2.35109	0.0187187	0.402709
GPR4	363.435	-0.30748	0.130769	-2.35132	0.0187069	0.402709
BRDT	12.1989	0.842176	0.358312	2.3504	0.0187533	0.402937
VASH2	66.431	0.467165	0.198915	2.34857	0.0188456	0.403085
MAGT1	1844.92	0.217995	0.0932321	2.3382	0.019377	0.404347
HAMP	37.049	0.642952	0.274645	2.34103	0.0192304	0.404347
PPP1R1B	33.4392	1.13194	0.482499	2.346	0.0189763	0.404347
RPL37	19816	0.721655	0.308265	2.34102	0.019231	0.404347
CYSLTR2	452.324	0.366159	0.156217	2.34392	0.0190823	0.404347
MED11	313.664	-0.147383	0.0630408	-2.3379	0.0193923	0.404347
S100A9	383.559	-0.941492	0.402668	-2.33813	0.0193803	0.404347
SHROOM1	392.184	-0.297953	0.127284	-2.34086	0.0192392	0.404347
GAPVD1	1247.95	0.211319	0.0901559	2.34393	0.019082	0.404347
LDLRAD4	1179.18	0.209015	0.0892966	2.34069	0.0192483	0.404347
GPR82	30.6498	0.624171	0.266047	2.34609	0.0189715	0.404347
TMEM119	171.329	0.599661	0.255957	2.34282	0.0191387	0.404347
TULP4	712.043	0.377148	0.161359	2.33732	0.0194226	0.404673
ICE2	654.493	0.205393	0.0879267	2.33596	0.0194935	0.405168
FAM174B	352.495	0.25823	0.110612	2.33455	0.019567	0.405564
ENSG00000285976	229.048	-0.707599	0.303338	-2.33271	0.0196634	0.406488
TMEM98	323.63	0.496992	0.213077	2.33245	0.0196768	0.40652
AVL9	541.285	0.197186	0.084606	2.33063	0.0197727	0.407276
GDF15	28.216	-0.7286	0.312841	-2.32898	0.0198601	0.4081
TMPRSS12	10.2575	0.767673	0.329775	2.32787	0.0199189	0.40882
SHISA6	86.1521	-0.356843	0.15331	-2.32759	0.0199341	0.408888
RSPO4	23.2075	1.37362	0.590336	2.32684	0.0199738	0.409289
ASPH	4388.81	0.202594	0.0870792	2.32655	0.0199894	0.409289
OR51L1	13.9618	0.687115	0.295376	2.32624	0.020006	0.409385
NCF1	137.449	-0.485005	0.208626	-2.32476	0.020085	0.409532
LDHC	23.9313	0.767903	0.33039	2.32423	0.020113	0.409532
TCF4	4114.67	0.212937	0.0916154	2.32425	0.0201123	0.409532
ELOVL4	13.7702	0.670566	0.288662	2.32302	0.0201783	0.409732
SCRG1	77.2007	0.516315	0.222249	2.32314	0.0201718	0.409732
DDIAS	29.5975	0.631376	0.271816	2.3228	0.0201898	0.409732
GTSE1	40.6638	0.444699	0.191482	2.3224	0.0202112	0.409795
RUNX1T1	1221.05	0.231853	0.0999005	2.32084	0.0202956	0.410393
LGALS12	62.2437	1.61843	0.697552	2.32016	0.0203322	0.410393
KAT6B	2035.14	0.210143	0.0905795	2.31998	0.0203418	0.410393
COL4A1	11959.2	-0.364268	0.156993	-2.32028	0.0203257	0.410393
DNAH10	35.4953	0.595871	0.256822	2.32017	0.0203314	0.410393
ZHX3	1594.91	0.220179	0.094963	2.31857	0.0204181	0.411692
DCN	18642.8	0.560815	0.242216	2.31534	0.0205941	0.411913
IGFBP1	17.225	0.930471	0.401723	2.3162	0.0205474	0.411913
CDH12	36.0952	0.758717	0.327468	2.31692	0.0205082	0.411913
SGO2	71.1771	0.419444	0.181108	2.316	0.0205585	0.411913
LUZP2	21.332	0.84326	0.364247	2.31508	0.0206088	0.411913
ACER3	698.828	0.24496	0.10586	2.314	0.0206677	0.412086
ANKUB1	20.03	0.555472	0.240016	2.31431	0.0206508	0.412086
SLC35E3	698.488	0.210483	0.0909951	2.31312	0.0207159	0.412448
COL4A4	705.128	0.303571	0.131344	2.31127	0.0208182	0.412463
KRR1	1007.54	0.215029	0.0931992	2.3072	0.0210437	0.412463
NEK4	518.665	0.215401	0.0933783	2.30676	0.0210683	0.412463
ATF6	1082.54	0.228654	0.0990655	2.30811	0.0209933	0.412463
ASS1	912.383	0.347489	0.150536	2.30835	0.0209797	0.412463
TMF1	783.057	0.24113	0.104497	2.30754	0.0210245	0.412463
NOPCHAP1	2035.13	0.406824	0.176113	2.31001	0.0208875	0.412463
LRRC51	187.191	0.268171	0.116203	2.30778	0.0210114	0.412463
OR52K1	84.5211	0.46226	0.200267	2.30822	0.020987	0.412463
C20orf203	25.6057	0.736356	0.318471	2.31216	0.0207689	0.412463
PDS5B	778.485	0.243977	0.105849	2.30495	0.0211695	0.413142
FOXF1	14.4102	0.724472	0.314505	2.30353	0.0212491	0.413142
RASSF8	589.241	0.303217	0.131516	2.30555	0.0211356	0.413142
GCNT3	45.4933	0.645125	0.2801	2.3032	0.0212678	0.413142
B4GALT3	714.925	-0.186023	0.0808202	-2.30169	0.0213528	0.413142
NANOS1	269.716	-0.395664	0.171738	-2.30388	0.0212292	0.413142
ZNF107	201.967	0.313043	0.135993	2.30191	0.0213404	0.413142
CAB39L	696.288	0.270506	0.117618	2.29987	0.0214553	0.41368
DPT	2439.19	0.600912	0.261254	2.30011	0.0214423	0.41368
DNAI4	102.856	0.445516	0.193705	2.29997	0.0214497	0.41368
CTRC	19.7675	0.734311	0.319204	2.30044	0.0214232	0.41368
LY6G5C	59.8618	-0.262175	0.113968	-2.30042	0.0214242	0.41368
TRPC3	37.8868	0.598616	0.260399	2.29884	0.021514	0.413882
GRIP1	39.9907	0.737103	0.320763	2.29797	0.0215636	0.41391
PCDH18	415.922	0.446903	0.194522	2.29744	0.0215937	0.414257
CD69	31.6054	1.11769	0.487001	2.29505	0.0217301	0.415159
ATP23	262.858	0.485997	0.211807	2.29453	0.0217602	0.415159
TGFB3	765.676	0.31748	0.138458	2.29296	0.02185	0.41547
NUCB2	1343.04	0.183772	0.080876	2.27227	0.02307	0.416544
FNDC3B	2573.95	0.269847	0.11796	2.28761	0.0221602	0.416544
MIB1	833.092	0.264005	0.115858	2.27869	0.0226853	0.416544
RNGTT	376.066	0.216266	0.0951621	2.2726	0.0230501	0.416544
SLC27A6	1721.57	0.508786	0.222942	2.28215	0.0224807	0.416544
BCHE	117.411	0.68585	0.299618	2.28908	0.0220747	0.416544
OPRD1	69.8501	0.438692	0.19261	2.27762	0.0227494	0.416544
CASP8AP2	638.96	0.231827	0.101576	2.28229	0.0224719	0.416544
EGR2	268.364	0.901216	0.394271	2.28578	0.0222673	0.416544
NFE2	19.6887	-0.76045	0.334546	-2.27308	0.0230213	0.416544
PTPN22	30.9519	0.510104	0.223135	2.28608	0.0222496	0.416544
ESPL1	40.7614	0.553871	0.243678	2.27296	0.0230286	0.416544
MYC	331.217	0.721666	0.316525	2.27997	0.0226095	0.416544
CDK15	25.6715	0.634415	0.278984	2.27402	0.0229649	0.416544
ASTN1	118.809	0.405356	0.178079	2.27627	0.0228296	0.416544
RGPD3	21.291	0.569991	0.250638	2.27416	0.0229565	0.416544
TMC1	60.966	0.585778	0.25701	2.2792	0.0226552	0.416544
MID1IP1	1064.83	0.26203	0.114953	2.27946	0.0226398	0.416544
CLMN	710.574	0.246587	0.108384	2.27513	0.0228979	0.416544
C2	346.534	0.795438	0.350036	2.27245	0.0230594	0.416544
ARL4D	138.078	0.570334	0.250954	2.27266	0.0230465	0.416544
GLDC	22.1379	0.652596	0.287159	2.27259	0.0230508	0.416544
OR51M1	11.8614	0.747613	0.32887	2.27328	0.0230095	0.416544
ROBO2	19.9841	0.635027	0.27818	2.28279	0.0224426	0.416544
LILRA5	32.2864	-0.59102	0.259698	-2.2758	0.022858	0.416544
ZNF624	105.633	0.420408	0.184925	2.27339	0.0230025	0.416544
OR6C74	92.5946	0.404835	0.176946	2.2879	0.0221431	0.416544
RPL41	14958.4	0.593525	0.260404	2.27925	0.0226522	0.416544
ARHGEF35	36.8251	0.691037	0.304425	2.26998	0.023209	0.417301
FFAR1	11.8652	0.658035	0.289959	2.26941	0.0232435	0.417351
PRDX4	412.848	0.30893	0.136214	2.26797	0.023331	0.418017
HPSE	58.1256	0.617354	0.272262	2.26749	0.02336	0.418017
DLEU7	75.665	0.492546	0.217189	2.26783	0.0233398	0.418017
HDAC4	1061.15	0.239422	0.105615	2.26692	0.0233948	0.418018
ZNF479	12.4259	0.710028	0.31321	2.26694	0.0233941	0.418018
PLAAT5	82.2768	0.742494	0.327693	2.26582	0.0234623	0.418572
CD180	58.8449	0.547847	0.24189	2.26486	0.0235212	0.41919
PPP1R3D	576.926	-0.210973	0.0931983	-2.26371	0.0235922	0.419343
ADCY3	929.819	0.379687	0.167754	2.26336	0.0236135	0.419343
LUM	4702.22	0.554293	0.245038	2.26207	0.0236933	0.419343
FAM220A	289.938	-0.240873	0.106462	-2.26253	0.0236647	0.419343
SERPINA3	314.475	1.07549	0.474988	2.26424	0.0235591	0.419343
ZC3H11B	11.6515	0.835999	0.36958	2.26203	0.0236957	0.419343
CXCL6	10.8541	1.56553	0.692189	2.26171	0.0237155	0.419389
SORCS1	153.942	0.623149	0.275551	2.26146	0.0237307	0.419437
BEND2	17.4745	0.678592	0.300094	2.26127	0.0237427	0.419437
NXPE1	11.5143	0.734235	0.325272	2.2573	0.0239895	0.420208
WHRN	55.484	0.476058	0.211108	2.25505	0.0241302	0.420208
EPHB6	225.8	0.653006	0.289547	2.25527	0.0241166	0.420208
KIF14	17.3063	0.671916	0.297343	2.25974	0.0238375	0.420208
PIMREG	11.0511	0.677497	0.299975	2.25851	0.023914	0.420208
SECISBP2L	1536.52	0.286365	0.126926	2.25616	0.0240605	0.420208
KDM6A	811.38	0.294142	0.130245	2.25837	0.0239225	0.420208
OR4K13	15.6311	0.64154	0.284289	2.25665	0.0240299	0.420208
CCDC30	294.76	0.340122	0.15078	2.25575	0.0240862	0.420208
LCN6	127.491	0.443958	0.196585	2.25835	0.0239239	0.420208
PRAM1	43.0511	-0.508415	0.225567	-2.25394	0.0241997	0.420704
CHD2	2966.99	0.223429	0.0991991	2.25233	0.0243012	0.421391
CEP152	131.105	0.450704	0.200172	2.25159	0.0243483	0.421666
TNFSF14	177.385	0.998104	0.443439	2.25083	0.0243964	0.421758
HYDIN	95.0078	0.417702	0.18566	2.24982	0.0244603	0.422136
FAR2	304.597	0.185069	0.0823022	2.24865	0.024535	0.422781
FCGR2B	324.37	0.703914	0.313092	2.24827	0.0245591	0.422781
SLC4A7	437.4	0.331145	0.147928	2.23855	0.025185	0.423147
NEXMIF	18.2044	0.530427	0.236583	2.24203	0.0249592	0.423147
PIBF1	287.543	0.23966	0.106905	2.2418	0.0249744	0.423147
WDR11	1040.9	0.189045	0.0843273	2.2418	0.0249742	0.423147
IREB2	1091.37	0.216976	0.096662	2.24469	0.0247879	0.423147
TCF12	1408.69	0.216122	0.0962129	2.24629	0.0246854	0.423147
SNTG1	21.0251	0.668412	0.297902	2.24373	0.0248495	0.423147
DNAI3	14.5129	0.658364	0.293311	2.24459	0.0247943	0.423147
OSR2	58.1249	0.656021	0.292368	2.24382	0.0248438	0.423147
OSCAR	32.893	-0.634278	0.283083	-2.24061	0.0250514	0.423147
ENTPD7	198.123	0.282656	0.12631	2.2378	0.0252341	0.423147
L3MBTL3	110.49	0.334943	0.149641	2.23831	0.0252007	0.423147
C21orf62	46.6892	0.772481	0.343797	2.24691	0.024646	0.423147
UPK3B	721.236	1.50436	0.669654	2.24647	0.0246736	0.423147
IL19	18.8218	0.655753	0.293198	2.23655	0.0253156	0.423545
ZNF556	81.2492	0.455377	0.203736	2.23513	0.0254087	0.424236
PAG1	726.077	0.271877	0.12172	2.23363	0.0255074	0.424797
MAP3K6	2133.13	0.277052	0.124055	2.2333	0.0255289	0.424797
MPV17L	412.241	0.267402	0.119717	2.23362	0.0255082	0.424797
SIGLEC11	35.6412	0.558652	0.250141	2.23335	0.025526	0.424797
C19orf33	88.4655	0.83201	0.372536	2.23337	0.0255246	0.424797
SLC16A12	276.732	0.325917	0.145973	2.23271	0.0255679	0.424991
OR7G2	26.5781	0.516384	0.231437	2.23121	0.0256674	0.425937
GEN1	270.161	-0.3501	0.15699	-2.23007	0.0257425	0.426508
HELB	26.1849	0.500078	0.224337	2.22914	0.0258049	0.426911
MGP	5710.43	0.741464	0.332728	2.22844	0.0258514	0.427023
ACKR4	126.14	0.533808	0.23956	2.22829	0.0258614	0.427023
ADAM21	11.5933	0.556984	0.249938	2.22849	0.025848	0.427023
OR1I1	90.8995	0.445489	0.200101	2.22632	0.0259926	0.427479
MT-ND4	4.11707e+06	-0.307268	0.137986	-2.22681	0.0259599	0.427479
ENSG00000286235	29.8479	1.08679	0.488099	2.22657	0.0259758	0.427479
PPL	816.931	0.394533	0.177294	2.22531	0.0260604	0.427813
MSS51	352.622	0.438599	0.197135	2.22487	0.02609	0.427813
FFAR4	26.5576	0.659974	0.296733	2.22413	0.0261397	0.427813
MGAM	47.1347	-0.751226	0.337758	-2.22415	0.0261381	0.427813
ZBTB8B	90.9958	0.44118	0.198352	2.22423	0.0261331	0.427813
XKR9	50.7009	0.501014	0.225319	2.22358	0.0261768	0.42812
SLC16A14	279.095	-0.275805	0.124096	-2.22251	0.0262486	0.428681
IQGAP2	253.468	0.446399	0.200944	2.22152	0.026316	0.429171
USP8	2098.75	0.185429	0.0834878	2.22104	0.0263485	0.429438
MTNR1A	82.2757	0.481087	0.216837	2.21866	0.0265097	0.430492
SUCNR1	20.7031	0.819293	0.369216	2.21901	0.0264862	0.430492
SEMA3A	57.2812	0.593406	0.267701	2.21668	0.026645	0.431465
SLC3A1	59.9733	0.419206	0.189112	2.21671	0.0266431	0.431465
CLEC4G	14.6243	1.44828	0.653212	2.21717	0.0266114	0.431465
LRRN4CL	149.423	0.462461	0.208742	2.21546	0.0267283	0.431798
NUP160	876.87	0.167692	0.0757104	2.21492	0.0267656	0.432197
LCN15	19.6995	0.542509	0.244993	2.21438	0.0268024	0.432588
ABCC2	26.094	0.552238	0.250015	2.20882	0.0271874	0.433113
AHI1	927.931	0.238908	0.107979	2.21253	0.0269298	0.433113
MORN3	42.35	0.480165	0.21724	2.21029	0.0270848	0.433113
HDAC8	676.749	0.284745	0.128859	2.20974	0.027123	0.433113
NPFFR1	58.995	0.535268	0.24219	2.21012	0.027097	0.433113
TLCD3B	20.6711	0.591081	0.267631	2.20856	0.027205	0.433113
SPICE1	126.185	0.298059	0.134778	2.21149	0.0270021	0.433113
CPSF2	1358.45	0.270897	0.122662	2.20849	0.02721	0.433113
PCLAF	59.1155	0.544384	0.246285	2.21038	0.0270789	0.433113
FSIP2	187.717	0.437503	0.197873	2.21103	0.0270338	0.433113
RPL23A	2422.84	0.294868	0.133228	2.21326	0.0268797	0.433113
PSG2	47.6259	0.881072	0.398644	2.21017	0.0270932	0.433113
MYOCOS	10.3667	0.812939	0.367848	2.20999	0.0271061	0.433113
SPP1	141.374	-0.638754	0.289461	-2.2067	0.0273347	0.433311
WDR55	927.026	-0.136478	0.0618316	-2.20725	0.0272964	0.433311
TNFRSF19	1229.66	0.258087	0.116941	2.20699	0.0273146	0.433311
FAM104B	360.964	0.3135	0.142081	2.20649	0.0273495	0.433311
TMSB4X	10261.2	0.519589	0.235372	2.20752	0.0272777	0.433311
TXNDC15	1003.87	0.14182	0.0642882	2.206	0.027384	0.433428
PSD	64.7017	0.433625	0.196831	2.20303	0.0275925	0.433766
TACR1	23.776	0.804721	0.365239	2.20327	0.0275756	0.433766
SYT14	31.5636	0.639771	0.290391	2.20314	0.0275852	0.433766
TRAPPC11	760.539	0.187473	0.085072	2.20369	0.0275459	0.433766
NDUFB1	4880.14	0.817405	0.370911	2.20378	0.02754	0.433766
LXN	117.331	0.559637	0.25413	2.20217	0.0276534	0.433871
ASDURF	75.3257	0.947379	0.430435	2.20098	0.0277373	0.433871
ACAA1	3240.3	-0.226319	0.103133	-2.19444	0.0282035	0.434195
MOXD1	254.032	0.532044	0.242558	2.19347	0.0282736	0.434195
CPB2	25.0089	0.607352	0.276525	2.19637	0.0280655	0.434195
IL12RB2	77.4694	0.457468	0.208234	2.1969	0.0280278	0.434195
FKBP14	695.645	0.223906	0.102145	2.19205	0.0283759	0.434195
CCDC170	52.0578	0.53208	0.242337	2.19562	0.0281193	0.434195
TWIST1	29.5814	0.611851	0.279215	2.19133	0.0284282	0.434195
LIF	106.874	1.0741	0.489335	2.19501	0.0281628	0.434195
SCG2	30.1526	1.62037	0.737323	2.19765	0.0279743	0.434195
LVRN	27.6038	1.03324	0.470564	2.19574	0.0281105	0.434195
RPLP2	8130.93	0.541825	0.24714	2.19238	0.0283521	0.434195
ATP2A1	50.7768	0.50462	0.229579	2.19802	0.0279474	0.434195
ZNF420	235.216	0.223909	0.102004	2.1951	0.0281564	0.434195
TEX35	32.2052	0.540192	0.246466	2.19175	0.0283979	0.434195
GET1-SH3BGR	45.4249	-1.19798	0.546404	-2.19248	0.0283449	0.434195
KHDC1	42.3575	0.394771	0.180287	2.18968	0.0285472	0.435596
RASD1	195.51	0.710121	0.324477	2.18851	0.0286325	0.436122
CAPN9	34.0151	0.500455	0.228666	2.18858	0.0286273	0.436122
OGN	1328.46	0.493122	0.225423	2.18754	0.0287028	0.436266
CA5B	304.471	0.324355	0.148292	2.18728	0.0287223	0.43633
ADIPOR2	2167.73	0.130124	0.0595153	2.1864	0.0287865	0.436414
THADA	628.806	0.202059	0.0924378	2.18589	0.0288236	0.436414
CYP2C19	22.2496	0.600765	0.274834	2.18592	0.0288216	0.436414
ENSG00000254979	10.1642	0.889096	0.406542	2.18697	0.0287444	0.436414
DLGAP3	218.014	-0.615334	0.281617	-2.18501	0.0288884	0.436431
MCM10	18.7031	0.920791	0.42369	2.17327	0.0297604	0.436437
PIGL	323.323	0.154733	0.0708996	2.18242	0.0290784	0.436437
CILK1	799.33	0.252094	0.115806	2.17687	0.0294904	0.436437
S1PR4	26.3129	-0.579027	0.265205	-2.18332	0.0290124	0.436437
UNC13A	32.7324	0.762513	0.350675	2.17442	0.0296737	0.436437
APC	1010.58	0.261313	0.119839	2.18053	0.0292179	0.436437
SPPL2A	1923.68	0.255592	0.117617	2.17309	0.0297736	0.436437
FGD4	581.362	0.227539	0.104592	2.1755	0.0295928	0.436437
CCNB3	16.8973	0.727609	0.333979	2.17861	0.0293607	0.436437
CRB2	72.4353	1.14291	0.525027	2.17685	0.0294914	0.436437
C16orf89	313.613	0.554443	0.255043	2.17392	0.0297114	0.436437
S100P	12.0428	-0.600461	0.275944	-2.17603	0.0295532	0.436437
CYB5R2	120.36	0.323032	0.148554	2.17452	0.0296662	0.436437
OR10G3	96.4246	0.423318	0.194271	2.17901	0.0293311	0.436437
MYRIP	83.3997	0.390724	0.179804	2.17305	0.0297762	0.436437
DNAH12	28.9	0.556516	0.255405	2.17895	0.0293352	0.436437
CHD9	1346.18	0.241546	0.111055	2.17502	0.0296289	0.436437
BBS12	193.699	0.248703	0.114348	2.17496	0.0296335	0.436437
CSMD1	39.1528	0.789009	0.362048	2.1793	0.0293097	0.436437
SHOX	34.9753	0.541072	0.248078	2.18106	0.029179	0.436437
PLAC9	347.076	0.482849	0.221494	2.17997	0.02926	0.436437
GFPT1	1847.07	0.272377	0.12512	2.17693	0.0294857	0.436437
TAS2R14	44.033	0.346369	0.159399	2.17296	0.029783	0.436437
MILR1	50.5468	0.526291	0.240972	2.18403	0.02896	0.436437
OR2AG1	17.4313	0.642161	0.29552	2.17298	0.0297816	0.436437
ENSG00000292354.1	34.9753	0.541072	0.248078	2.18106	0.029179	0.436437
TRIM36	12.7477	0.786591	0.362132	2.17211	0.0298473	0.437193
ZNF396	46.175	0.444579	0.204731	2.17153	0.0298911	0.437276
DOK3	147.327	-0.476511	0.219494	-2.17096	0.0299345	0.437352
ASAP1	1983.91	0.213241	0.0982236	2.17097	0.0299332	0.437352
CDCA5	31.4103	0.40601	0.187123	2.16975	0.0300255	0.43781
CLUAP1	646.475	0.236571	0.109046	2.16946	0.0300474	0.437817
CPZ	55.4577	0.919235	0.423763	2.16922	0.0300658	0.437817
ATP10A	164.435	0.389527	0.179572	2.16919	0.0300682	0.437817
GLI3	288.953	0.282406	0.130226	2.16858	0.0301147	0.437938
FAM43B	63.7541	0.444635	0.205028	2.16865	0.030109	0.437938
DCAF15	934.639	-0.248318	0.11468	-2.16532	0.0303633	0.438969
DSC3	52.4752	0.904791	0.417673	2.16627	0.0302909	0.438969
RPS15A	4947.1	0.491097	0.226902	2.16436	0.0304365	0.439312
DKK1	10.5328	1.24439	0.575388	2.1627	0.0305645	0.439344
SYCP1	23.2027	0.552158	0.255268	2.16305	0.030537	0.439344
SLC35E4	138.941	-0.222121	0.102772	-2.1613	0.0306723	0.439419
IGFBP4	7765.27	0.537797	0.248714	2.16231	0.0305941	0.439419
CFAP97	449.433	0.244243	0.112988	2.16167	0.0306435	0.439419
RNF13	1226.58	0.203175	0.094056	2.16015	0.030761	0.440259
SAGSIN1	261.078	-0.197118	0.0913009	-2.159	0.0308505	0.440382
ARGFX	108.336	0.405819	0.188141	2.157	0.0310058	0.440839
NFXL1	200.435	0.333275	0.154589	2.15587	0.0310938	0.440973
PHOSPHO1	46.908	-0.416018	0.192976	-2.1558	0.0310992	0.440973
FOXD4L5	10.95	0.501525	0.232589	2.15627	0.0310627	0.440973
SDR42E2	22.2373	0.507491	0.235716	2.15298	0.0313203	0.441826
ZNF883	757.629	0.471125	0.218775	2.15346	0.0312822	0.441826
MAST1	40.0197	0.495956	0.230399	2.15259	0.0313506	0.442072
APPBP2	733.779	0.195462	0.0908619	2.15119	0.0314609	0.442737
FBP1	66.5706	0.999937	0.464867	2.15102	0.031475	0.442737
NAV3	275.242	0.362058	0.168707	2.14608	0.0318662	0.44489
TFRC	1913.37	0.355273	0.16555	2.14601	0.0318718	0.44489
CCDC125	320.177	0.231609	0.107919	2.14615	0.0318614	0.44489
SLC5A5	14.3958	0.739303	0.344702	2.14476	0.0319718	0.445171
ATP1B2	426.125	-0.340287	0.158649	-2.14491	0.0319598	0.445171
TMX3	1209.01	0.249242	0.116223	2.14452	0.0319911	0.445259
CCDC88A	1365.31	0.235657	0.109931	2.14367	0.0320594	0.445689
ANKFN1	12.8986	0.981535	0.457914	2.14349	0.0320735	0.445689
C11orf80	105.68	0.352383	0.164434	2.14301	0.0321127	0.445689
MRPL9	540.375	0.148911	0.0695153	2.14213	0.0321829	0.445762
SLC5A10	33.0378	-0.427949	0.199771	-2.1422	0.0321774	0.445762
STRA6	14.4465	-0.643991	0.300694	-2.14168	0.0322189	0.445903
EPC1	811.932	0.160591	0.0750102	2.14093	0.0322799	0.446225
GRAMD2A	12.8945	0.745226	0.348205	2.14019	0.0323394	0.446312
PGAP1	324.552	0.38701	0.180881	2.13958	0.0323886	0.446413
NRG2	139.381	-0.334462	0.15644	-2.13796	0.03252	0.446885
OR4K2	23.1997	0.86289	0.403528	2.13836	0.0324873	0.446885
SCNN1G	11.7027	0.625972	0.292818	2.13775	0.0325369	0.446885
SCNN1B	17.0071	0.996075	0.465794	2.13845	0.0324805	0.446885
SLC39A9	813.526	0.168506	0.0788975	2.13576	0.0326986	0.448002
SLCO1A2	30.9383	0.558939	0.262106	2.13249	0.0329667	0.448002
OLFML3	648.845	0.511114	0.239724	2.1321	0.0329988	0.448002
PLA2G2D	11.5823	0.746899	0.349666	2.13604	0.0326764	0.448002
INVS	294.354	0.20299	0.0952246	2.1317	0.0330314	0.448002
TMEM243	127.777	0.31615	0.148367	2.13086	0.0331004	0.448002
FLG	59.5238	0.63716	0.298436	2.135	0.0327613	0.448002
LGSN	16.5804	0.61216	0.286585	2.13605	0.0326755	0.448002
SLC13A3	51.0107	0.412468	0.193487	2.13176	0.0330263	0.448002
SIM2	20.7592	0.517304	0.242728	2.13121	0.0330721	0.448002
EEIG2	396.758	0.342117	0.160398	2.13293	0.0329306	0.448002
COL6A3	8216.68	0.457569	0.214363	2.13455	0.0327975	0.448002
AGBL2	23.435	0.660715	0.309351	2.13581	0.0326947	0.448002
RNF152	452.419	0.249077	0.11669	2.13451	0.0328011	0.448002
C1S	5027.17	0.589159	0.276003	2.13461	0.0327925	0.448002
FAM3B	11.423	0.670597	0.314345	2.13332	0.0328987	0.448002
ARHGAP8	20.4357	0.670634	0.314025	2.13561	0.0327113	0.448002
BCL6	1913.34	-0.203795	0.095663	-2.13035	0.0331431	0.448189
ZNF614	355.454	0.184298	0.0865288	2.12991	0.0331794	0.448189
ZNF544	950.746	0.156989	0.0737212	2.12949	0.0332135	0.448474
ASPN	1286.46	0.590696	0.277805	2.12629	0.0334789	0.449424
RPL24	10445.5	0.608304	0.285942	2.12737	0.0333895	0.449424
TMPRSS13	13.1139	0.504362	0.237196	2.12635	0.0334739	0.449424
THRSP	128.159	1.45009	0.68151	2.12776	0.0333569	0.449424
ADAMTS3	23.8847	0.681634	0.320615	2.12602	0.0335018	0.449424
COX6B2	17.6788	0.510954	0.240143	2.12771	0.0333615	0.449424
COL14A1	1472.8	0.624579	0.293628	2.12711	0.033411	0.449424
FRK	798.557	0.337306	0.158682	2.12568	0.03353	0.449569
NSMAF	859.464	0.155379	0.073123	2.1249	0.0335947	0.449771
ST8SIA4	340.148	-0.311952	0.146803	-2.12496	0.0335898	0.449771
NEK2	21.3826	0.531191	0.250006	2.12471	0.0336105	0.449771
CEP290	488.204	0.203417	0.0957932	2.1235	0.0337122	0.450019
E2F3	410.311	-0.185442	0.0873752	-2.12236	0.0338071	0.450189
CLEC10A	139.665	0.663668	0.312624	2.12289	0.0337627	0.450189
INTS14	449.181	0.136992	0.064539	2.12262	0.0337858	0.450189
PRRT4	60.419	0.514967	0.242645	2.12231	0.0338118	0.450189
MT1M	36.9478	0.819531	0.386291	2.12153	0.0338768	0.450289
PRR11	169.716	0.474854	0.223916	2.12068	0.0339484	0.4505
SEC14L6	33.4382	0.519847	0.245138	2.12063	0.0339532	0.4505
CCNJL	393.807	-0.251914	0.118843	-2.11972	0.0340296	0.450904
SCLT1	220.918	0.191939	0.0905525	2.11964	0.0340362	0.450904
KIF21B	115.644	-0.422135	0.199322	-2.11786	0.0341869	0.45126
FLVCR2	105.58	0.333336	0.157402	2.11774	0.0341969	0.45126
DNAJB1	1604.49	0.201554	0.0951797	2.11762	0.0342074	0.45126
TREM1	46.1511	-0.78541	0.371015	-2.11692	0.0342664	0.451692
SRD5A1	312.02	0.377677	0.178496	2.11589	0.0343539	0.452219
MT2A	1672.47	0.600119	0.283921	2.11368	0.0345423	0.452843
PENK	107.102	0.954591	0.451537	2.11409	0.0345074	0.452843
CCL2	414.295	0.740483	0.350522	2.11252	0.0346423	0.453171
CEP192	542.164	0.252069	0.1194	2.11114	0.0347605	0.454027
CILP	2978.54	0.666646	0.315792	2.11103	0.0347695	0.454027
CYP4F3	53.139	-0.664596	0.314803	-2.11115	0.0347598	0.454027
TNS4	12.7382	0.827019	0.392139	2.10899	0.0349452	0.454095
ITGB3BP	102.826	0.327126	0.155102	2.1091	0.034936	0.454095
POC5	93.5593	0.225672	0.106995	2.10919	0.0349283	0.454095
CWC27	1381.8	0.181023	0.0857684	2.1106	0.0348065	0.454095
PGLYRP3	45.1682	0.629736	0.298438	2.1101	0.0348495	0.454095
RAB3B	43.2549	0.473868	0.224675	2.10912	0.0349338	0.454095
DCX	16.0169	0.589991	0.280023	2.10693	0.0351233	0.454453
CTCFL	46.0627	0.441942	0.209799	2.10651	0.0351605	0.454453
ELL3	27.0907	0.373064	0.177069	2.10688	0.0351281	0.454453
CDC73	1486.57	0.186084	0.088337	2.10653	0.0351586	0.454453
GAB3	1610.78	-0.240331	0.11399	-2.10834	0.0350012	0.454453
FOXI2	73.2924	-0.505137	0.239833	-2.1062	0.0351869	0.454587
TMSB10	3284.99	0.549969	0.261518	2.10298	0.0354671	0.455863
SEL1L	2119.41	0.261711	0.124452	2.10291	0.0354735	0.455863
TAF1B	140.695	0.316353	0.150402	2.10338	0.0354322	0.455863
EFNA3	17.215	0.42966	0.204315	2.10293	0.0354721	0.455863
VILL	200.397	-0.313005	0.148929	-2.10171	0.0355785	0.456047
SEC63	2595.22	0.181414	0.0863267	2.10148	0.0355986	0.456135
MEST	290.043	0.791978	0.376984	2.10083	0.0356563	0.456534
SERPINA5	99.5083	0.978792	0.465885	2.10093	0.0356472	0.456534
PPP1R16B	926.35	-0.312737	0.14897	-2.09932	0.0357887	0.456634
CNR1	30.503	0.731807	0.348749	2.09838	0.0358719	0.456634
GCC2	1201.68	0.203758	0.0970047	2.10049	0.0356856	0.456634
S100A4	989.191	0.750799	0.357528	2.09997	0.0357311	0.456634
PHYHIPL	10.5731	0.787286	0.375304	2.09773	0.0359291	0.456963
ZNF331	891.577	0.325178	0.155066	2.09702	0.0359914	0.457004
C1QA	1041.22	0.685121	0.326757	2.09673	0.0360175	0.457072
ASPM	30.7627	0.565961	0.27032	2.09367	0.0362893	0.457482
CNOT1	2801.46	0.131863	0.0629814	2.09369	0.0362879	0.457482
EMP3	559.427	0.434496	0.20737	2.09526	0.0361475	0.457482
KCNH8	11.8096	0.676968	0.323244	2.09429	0.036234	0.457482
TRPA1	17.7922	0.691213	0.33053	2.09123	0.0365078	0.457893
FOXP2	121.631	0.349828	0.167272	2.09137	0.036495	0.457893
ATF7IP	2278.41	0.181253	0.0866872	2.09088	0.0365388	0.457893
RAB37	123.715	-0.281705	0.134628	-2.09247	0.0363967	0.457893
MEFV	55.2966	-0.41787	0.20001	-2.08925	0.0366852	0.458151
SYCE2	15.7157	0.576032	0.275762	2.08887	0.0367195	0.458151
LRRTM4	24.4295	0.583887	0.279459	2.08935	0.0366762	0.458151
TMEM232	25.1302	0.413884	0.198163	2.0886	0.0367435	0.458151
MT-ND1	1.64737e+06	-0.302483	0.144748	-2.08972	0.0366426	0.458151
SLC24A2	36.9912	0.366963	0.175762	2.08784	0.0368119	0.45821
CARMIL1	210.069	0.419291	0.201032	2.08569	0.0370065	0.458288
ALCAM	250.063	0.507994	0.243478	2.08641	0.0369418	0.458288
OR10A2	18.661	0.629405	0.301645	2.08658	0.0369263	0.458288
MT-CO1	7.93537e+06	-0.294805	0.141275	-2.08674	0.0369112	0.458288
HACE1	363.231	0.231187	0.110933	2.08402	0.0371579	0.459667
CEP76	140.721	0.233366	0.111988	2.08385	0.0371742	0.459702
MCTP1	202.438	0.435723	0.209186	2.08295	0.0372557	0.460171
MYLIP	691.677	-0.169567	0.0816755	-2.07611	0.0378838	0.461014
PCDH11X	18.9113	0.556631	0.267594	2.08014	0.0375131	0.461014
GSG1	51.8083	0.478158	0.230164	2.07747	0.0377586	0.461014
POLK	988.761	0.206088	0.0991851	2.07781	0.0377271	0.461014
C4BPB	46.4773	0.511049	0.246141	2.07625	0.0378711	0.461014
MYRF	463.603	1.11895	0.538052	2.07964	0.0375587	0.461014
MAL2	74.9519	0.734136	0.353538	2.07654	0.0378439	0.461014
ALOX15	210.924	1.26757	0.610341	2.07683	0.0378175	0.461014
OR1F1	32.6582	0.4158	0.199771	2.08139	0.0373984	0.461014
FRAT2	208.469	-0.202633	0.0973535	-2.08141	0.0373964	0.461014
PBX1	2183.61	0.192401	0.0926208	2.0773	0.0377743	0.461014
MRTFB	1370.32	0.220705	0.106237	2.07746	0.0377587	0.461014
MYBPC1	43.4374	0.534498	0.257143	2.0786	0.0376537	0.461014
SGMS1	757.921	0.152885	0.0736324	2.07633	0.0378637	0.461014
GALNT4	68.9187	0.760774	0.366245	2.07723	0.0377804	0.461014
SYNRG	847.315	0.270549	0.13021	2.07779	0.0377286	0.461014
GLB1	845.006	0.207198	0.0998756	2.07456	0.0380274	0.461456
CLDN18	16.7794	0.442448	0.213325	2.07406	0.0380741	0.4617
LRRN4	89.5932	0.715995	0.345263	2.07376	0.0381012	0.4617
BMAL2	96.6562	0.555246	0.267927	2.07238	0.0382298	0.461831
ATP7A	389.479	0.264667	0.12771	2.07241	0.0382276	0.461831
ZNF521	442.142	0.243167	0.117338	2.07236	0.0382317	0.461831
TDP1	119.524	0.251926	0.121753	2.06915	0.0385318	0.463616
ENSG00000283782	459.483	0.384157	0.185661	2.06913	0.0385336	0.463616
AKR1C2	468.045	0.547196	0.264496	2.06882	0.0385626	0.463652
ZMYM1	178.835	0.205341	0.099293	2.06803	0.0386369	0.4638
GRXCR2	16.8637	0.748611	0.36211	2.06736	0.0387005	0.4638
BTBD18	31.7412	0.362091	0.175073	2.06823	0.0386186	0.4638
CCL22	59.5536	0.429396	0.207747	2.06691	0.0387425	0.464073
IGFBP6	861.746	0.559736	0.270856	2.06655	0.0387769	0.464323
MEDAG	319.347	0.731744	0.354257	2.06557	0.0388687	0.464423
STAG1	821.081	0.201081	0.0973623	2.06528	0.0388963	0.464423
SBF2	1477.45	0.130799	0.0633239	2.06556	0.0388705	0.464423
UBE2QL1	1170.7	-0.28601	0.138635	-2.06304	0.0391086	0.465056
DDX18	1076.84	0.162095	0.0786024	2.06222	0.0391872	0.465508
DOCK7	618.972	0.294555	0.14299	2.05997	0.0394014	0.46644
KLHL15	255.513	0.255494	0.124126	2.05834	0.0395578	0.467183
WNT10B	17.8678	0.66095	0.321163	2.05799	0.0395913	0.467401
NOVA1	208.23	0.46498	0.226025	2.0572	0.0396667	0.467462
PRR19	14.4051	0.587847	0.285727	2.05737	0.0396503	0.467462
RPL39	1783.73	0.577952	0.280889	2.05759	0.0396299	0.467462
MYOF	1548.26	0.308015	0.149769	2.0566	0.0397243	0.467653
SLC25A27	804.429	-0.246261	0.119777	-2.056	0.0397829	0.467745
SLC22A4	79.0545	0.288889	0.140582	2.05496	0.039883	0.468271
PTPRK	1498.33	0.216303	0.105292	2.05431	0.0399456	0.468386
FOXP1	2116.86	0.183388	0.0892838	2.05399	0.039977	0.468403
FBL	663.324	0.221979	0.10814	2.05269	0.0401023	0.469076
PLA2G4A	101.061	0.579923	0.282579	2.05225	0.0401449	0.469076
TMEM258	1686.9	0.502271	0.244905	2.05088	0.040279	0.469076
PYCR1	125.979	0.400927	0.195477	2.05102	0.0402649	0.469076
ERICH2	56.2541	-0.307564	0.149896	-2.05185	0.040184	0.469076
MIS18A	68.2904	0.249895	0.121869	2.05053	0.0403129	0.469153
KIF4A	15.0611	0.631549	0.308332	2.04828	0.0405328	0.469508
ATF2	832.554	0.154556	0.0755835	2.04483	0.0408712	0.469508
PEX6	1120.23	-0.27124	0.132426	-2.04824	0.0405363	0.469508
PCNX2	146.172	0.424505	0.207169	2.04907	0.0404551	0.469508
ALDH1L2	190.817	0.425389	0.207641	2.04868	0.0404938	0.469508
NNMT	394.656	0.73459	0.359188	2.04514	0.0408409	0.469508
DNAJC18	691.729	0.16405	0.0800775	2.04864	0.0404969	0.469508
PDE2A	1460.65	0.287913	0.140664	2.04681	0.040677	0.469508
RAB42	46.3238	0.470446	0.230021	2.04523	0.0408318	0.469508
SLC28A3	47.0586	0.907965	0.443781	2.04597	0.040759	0.469508
MYH3	94.3746	0.342462	0.167536	2.04411	0.0409424	0.469956
SFT2D2	834.75	0.246443	0.120557	2.0442	0.0409337	0.469956
ARHGAP39	104.459	0.313517	0.153414	2.0436	0.0409931	0.470224
RET	173.138	0.554484	0.271353	2.0434	0.0410126	0.47029
GSTM3	1565.45	-0.304397	0.149051	-2.04224	0.0411282	0.470988
TPPP3	390.897	0.499709	0.244794	2.04134	0.0412169	0.471375
MBTPS2	558.357	0.184658	0.0905006	2.04041	0.0413095	0.471531
PHF20	1302.29	0.153129	0.0750595	2.0401	0.0413402	0.471531
CYREN	775.613	-0.274182	0.134361	-2.04063	0.0412875	0.471531
NR2E3	10.8114	0.62809	0.30807	2.03879	0.0414706	0.472391
CRLF1	187.546	0.653432	0.321561	2.03206	0.0421476	0.473231
FKBP6	20.3072	0.461464	0.227001	2.03288	0.0420649	0.473231
VWF	33078.2	-0.248646	0.122515	-2.02951	0.042406	0.473231
LEPR	432.55	0.384732	0.18974	2.02767	0.0425936	0.473231
A1BG	89.8477	0.445043	0.218802	2.034	0.0419513	0.473231
PUS7L	460.471	0.282238	0.139178	2.02789	0.0425712	0.473231
APOC1	35.1129	0.950248	0.468452	2.02848	0.0425109	0.473231
GPR12	16.1724	0.557792	0.274837	2.02954	0.0424033	0.473231
CEP162	164.338	0.286763	0.141133	2.03186	0.0421682	0.473231
AVIL	377.639	0.203381	0.100152	2.03073	0.0422825	0.473231
ARHGAP24	905.542	0.213531	0.105261	2.02858	0.0425015	0.473231
SCUBE3	614.366	0.436767	0.21441	2.03706	0.0416437	0.473231
TM7SF2	2621.29	-0.3152	0.155318	-2.02939	0.0424186	0.473231
TTC39B	188.176	0.299179	0.147383	2.02994	0.0423622	0.473231
C1R	4987.14	0.671607	0.329832	2.03621	0.0417294	0.473231
NBPF20	217.547	0.284061	0.139946	2.02979	0.0423777	0.473231
ATP5ME	9324.5	0.703259	0.346177	2.0315	0.0422039	0.473231
TMEM167A	1515.41	0.236977	0.116435	2.03527	0.0418239	0.473231
EXOC3	2054.47	-0.18623	0.0915211	-2.03483	0.0418676	0.473231
MIGA1	469.42	0.194531	0.0959258	2.02793	0.042567	0.473231
MAP7D2	38.1164	-0.427955	0.210718	-2.03093	0.0422616	0.473231
ZNF74	255.977	-0.170104	0.0836262	-2.0341	0.0419412	0.473231
SAPCD2	21.7046	0.490604	0.241454	2.03187	0.0421667	0.473231
OR11G2	13.7137	0.609798	0.300388	2.03004	0.0423528	0.473231
TLK1	755.326	0.172111	0.0846857	2.03235	0.0421179	0.473231
ARHGEF38	24.2535	0.401603	0.197969	2.02862	0.0424969	0.473231
ENSG00000285283	13.0288	2.99642	1.47697	2.02876	0.0424823	0.473231
GPD2	574.704	0.207934	0.102618	2.02628	0.0427358	0.473468
ERAP1	1257.45	0.213168	0.105237	2.02559	0.0428066	0.473489
SLC9A4	68.096	0.458517	0.226337	2.02582	0.0427836	0.473489
ANKRD60	16.3103	0.476723	0.235623	2.02324	0.043048	0.474673
GDPD1	68.6985	0.37882	0.187251	2.02307	0.0430664	0.474684
KCNJ14	41.0248	0.362243	0.179074	2.02287	0.0430865	0.474753
CFH	2633.75	0.634917	0.314396	2.01948	0.0434375	0.475224
NEDD4	1246.49	0.354669	0.175612	2.01961	0.0434236	0.475224
HHLA2	20.4837	0.434203	0.214994	2.0196	0.0434248	0.475224
ADGRE3	15.9817	-0.662069	0.327755	-2.02001	0.0433823	0.475224
RPL27	7844.15	0.566936	0.280747	2.01939	0.0434472	0.475224
NPAT	371.739	0.177301	0.0876861	2.022	0.0431767	0.475224
TBC1D30	53.1989	0.413447	0.204771	2.01907	0.0434799	0.475306
STC2	364.194	-0.305605	0.151433	-2.01809	0.0435823	0.47561
ZDHHC13	288.809	0.202918	0.100538	2.01832	0.0435579	0.47561
ZNF709	98.6	0.314257	0.155827	2.01671	0.0437259	0.475737
VSIG10L2	12.087	1.44019	0.714187	2.01654	0.0437432	0.475737
CDH3	32.9058	0.746842	0.37069	2.01474	0.0439324	0.47607
SAMD15	18.6276	0.491651	0.243981	2.01512	0.0438923	0.47607
RPS3A	5293.85	0.282079	0.139924	2.01594	0.0438059	0.47607
FADS1	1247.12	0.177089	0.0879468	2.0136	0.0440518	0.47653
RELN	262.314	0.572598	0.284358	2.01365	0.0440459	0.47653
ASIC1	70.119	0.42024	0.208814	2.01251	0.0441664	0.47672
MBOAT7	672.831	-0.225518	0.112081	-2.01209	0.0442104	0.476783
FAM186B	61.3997	0.353854	0.17589	2.0118	0.0442414	0.476783
NUP85	569.971	0.186952	0.0929428	2.01147	0.0442754	0.476848
SRFBP1	139.162	0.189214	0.0940738	2.01134	0.0442897	0.476853
ZNF417	328.722	0.160834	0.0800046	2.01032	0.0443978	0.47733
C7	7074.05	0.462041	0.229962	2.0092	0.0445155	0.47749
SIL1	696.873	0.169335	0.0842608	2.00966	0.0444674	0.47749
NUDT15	380.439	-0.179993	0.0895715	-2.00949	0.0444855	0.47749
KATNBL1	405.003	0.173038	0.0861994	2.00742	0.0447054	0.477706
NOSTRIN	248.939	-0.271124	0.135127	-2.00644	0.0448091	0.477706
CACNB2	2062.54	0.264652	0.131852	2.00719	0.0447292	0.477706
CERKL	22.6955	0.619151	0.3084	2.00762	0.0446837	0.477706
EXOC3L4	35.1654	0.498369	0.24847	2.00575	0.0448829	0.477898
PDE11A	102.097	0.505004	0.252035	2.00371	0.0451016	0.479142
NOTCH2NLA	576.586	0.273761	0.136624	2.00375	0.0450972	0.479142
RGL4	17.6699	-0.577975	0.288513	-2.00329	0.0451462	0.479468
ZNF345	386.485	0.270805	0.135191	2.00314	0.0451624	0.479491
MKRN1	3098.11	-0.13059	0.0652808	-2.00043	0.0454535	0.479781
MISP3	143.293	-0.255141	0.127541	-2.00047	0.0454496	0.479781
SLC22A9	10.9205	0.677868	0.338808	2.00075	0.0454199	0.479781
EFCAB12	68.6246	0.372601	0.186262	2.00041	0.0454562	0.479781
ZNF124	118.727	0.277655	0.138735	2.00133	0.0453563	0.479781
SRXN1	1203.91	-0.21426	0.107001	-2.0024	0.0452413	0.479781
ENSG00000290183	14.1633	1.97927	0.989389	2.0005	0.0454462	0.479781
OR10H5	82.4664	0.373123	0.186721	1.99829	0.0456854	0.481033
UGT8	14.313	0.621783	0.311248	1.99771	0.0457482	0.481396
ZNF566	371.965	0.211203	0.105729	1.99758	0.0457619	0.481396
GPC5	25.413	0.609403	0.305192	1.99679	0.0458484	0.481863
CNTLN	226.54	0.214978	0.107685	1.99636	0.0458947	0.482056
GRAP2	53.2041	-0.525914	0.263974	-1.9923	0.0463384	0.482281
BLOC1S6	2861.32	0.261541	0.131117	1.99472	0.0460731	0.482281
CHN2	862.702	-0.276631	0.138663	-1.99499	0.0460442	0.482281
CORO2A	60.3438	0.479778	0.24091	1.99152	0.0464236	0.482281
UST	176.024	0.334561	0.167834	1.9934	0.0462175	0.482281
KCNJ5	506.717	0.403247	0.202245	1.99385	0.0461684	0.482281
GPSM2	165.634	0.358033	0.179779	1.99151	0.0464244	0.482281
MAGEA10	14.8098	0.538765	0.270065	1.99495	0.0460485	0.482281
CLN6	467.577	0.161471	0.0810169	1.99305	0.0462562	0.482281
HILPDA	162.094	0.287538	0.144217	1.99378	0.0461756	0.482281
GPAT3	1575.66	-0.243619	0.122327	-1.99153	0.0464223	0.482281
ONECUT1	156.162	-0.520826	0.261195	-1.99401	0.0461508	0.482281
CARMIL3	17.6672	-0.431736	0.216413	-1.99496	0.0460468	0.482281
ZNF460	91.35	0.346967	0.174145	1.99241	0.0463261	0.482281
PEG3	225.673	0.386162	0.193702	1.99359	0.0461967	0.482281
LNPK	815.437	0.227435	0.114299	1.98982	0.0466108	0.482426
KLK11	87.8691	0.860067	0.432247	1.98976	0.0466175	0.482426
ACCS	731.935	-0.27283	0.137169	-1.98901	0.0467	0.482697
RCAN3	301.228	0.201656	0.101447	1.98781	0.0468332	0.483348
NOX4	96.8417	0.523697	0.263706	1.98591	0.0470435	0.484065
SEMA3C	1837.98	0.265355	0.133678	1.98504	0.0471399	0.484364
CHD8	1686.93	0.113732	0.0572889	1.98524	0.0471181	0.484364
DCPS	438.886	-0.154949	0.0781026	-1.98391	0.0472656	0.484364
DCAF10	956.15	0.175183	0.0883034	1.98388	0.0472698	0.484364
BRD8	1314.22	0.112428	0.0566876	1.9833	0.0473343	0.484544
TMCO1	1107.06	0.257468	0.129855	1.98273	0.047398	0.484666
NOS1	117.223	0.531555	0.26815	1.9823	0.0474455	0.484819
GPATCH2	327.116	0.205072	0.103537	1.98067	0.0476285	0.484819
MSLN	423.736	1.52758	0.77065	1.9822	0.0474574	0.484819
RPGRIP1L	132.847	0.266883	0.134706	1.98122	0.0475664	0.484819
SHC3	64.2718	0.555227	0.280198	1.98156	0.0475291	0.484819
FAM91A1	458.67	0.224214	0.113185	1.98095	0.0475971	0.484819
HSH2D	45.8917	-0.472029	0.238279	-1.98099	0.0475921	0.484819
BICDL1	204.072	0.949384	0.479486	1.98	0.0477032	0.484978
CDK13	1556.78	0.127392	0.0643611	1.97934	0.0477779	0.485196
RAD18	108.437	0.298311	0.150851	1.97752	0.0479828	0.485196
SMC1A	2812.05	0.257312	0.130156	1.97695	0.0480471	0.485196
BMF	208.254	0.243779	0.123258	1.97778	0.047953	0.485196
GNB4	742.133	0.252208	0.127468	1.9786	0.0478609	0.485196
CSTA	22.4076	1.21391	0.614185	1.97646	0.0481031	0.485196
HCRTR1	42.2236	-0.430393	0.217618	-1.97775	0.0479573	0.485196
MBIP	182.875	0.184135	0.0931604	1.97653	0.0480943	0.485196
NR4A2	343.265	0.910113	0.460011	1.97846	0.0478771	0.485196
PLXDC1	2313.61	0.213195	0.107779	1.97807	0.0479203	0.485196
AIM2	24.6095	0.54389	0.275168	1.97657	0.0480899	0.485196
RCC1	161.05	0.311646	0.157566	1.97787	0.047943	0.485196
SPATA21	10.9977	0.593	0.300102	1.97599	0.0481555	0.485196
INSYN2A	12.7825	0.447787	0.226589	1.97621	0.0481307	0.485196
APOL6	919.33	0.32134	0.162613	1.97611	0.0481426	0.485196
ENO1	3662.88	0.263475	0.133356	1.97573	0.0481852	0.485259
MAGI2	399.904	0.323126	0.163627	1.97477	0.0482939	0.485815
CYP46A1	483.779	0.31827	0.161202	1.97436	0.0483413	0.485913
NR4A1	3501.42	0.673491	0.341186	1.97397	0.0483851	0.485913
METTL8	338.277	0.202489	0.102612	1.97333	0.0484575	0.485913
GGACT	40.7332	0.31446	0.159392	1.97287	0.0485098	0.485913
CHST6	91.3643	0.529571	0.268289	1.97389	0.0483947	0.485913
NBPF14	1703.77	0.354936	0.179841	1.97361	0.0484259	0.485913
IL17RD	272.551	0.330108	0.167446	1.97143	0.048675	0.485995
HEATR3	300.88	0.260048	0.131944	1.97089	0.0487362	0.486202
CDHR2	19.5139	-0.51886	0.26341	-1.96978	0.0488632	0.486295
PCOLCE	1127.15	0.408952	0.207606	1.96985	0.0488557	0.486295
PRDM14	10.1923	0.561063	0.284817	1.9699	0.0488494	0.486295
BEND6	109.191	0.372161	0.188916	1.96999	0.04884	0.486295
SNIP1	354.738	0.179503	0.0911071	1.97024	0.0488104	0.486295
ANKRD20A1	67.638	0.445261	0.226055	1.9697	0.0488728	0.486295
CORO1A	345.906	-0.517564	0.262867	-1.96892	0.048962	0.486619
PCDHB1	56.6828	0.368038	0.186906	1.9691	0.0489415	0.486619
SLC5A12	23.846	0.522578	0.265496	1.96831	0.0490322	0.486788
ZNF19	92.4016	0.311804	0.158423	1.96817	0.0490481	0.486788
BRAF	948.584	0.17874	0.0908263	1.96793	0.0490759	0.486788
KIAA1586	119.078	0.218438	0.110998	1.96794	0.049075	0.486788
TSHZ2	579.928	0.440631	0.223908	1.96791	0.0490781	0.486788
NPC2	1771.82	0.425086	0.216049	1.96755	0.0491203	0.486807
XKR5	18.2287	0.422585	0.214793	1.9674	0.0491367	0.486807
PCDHB13	125.34	0.186762	0.0949484	1.96698	0.049185	0.486865
TMEM88B	27.682	0.410272	0.208623	1.96657	0.0492326	0.487186
ANLN	42.3911	0.680576	0.347009	1.96127	0.049848	0.487906
ARHGAP22	205.656	0.277825	0.141467	1.96389	0.0495434	0.487906
TMTC1	1634.72	0.214549	0.109402	1.96111	0.0498665	0.487906
TOR1A	461.487	0.141963	0.072348	1.96223	0.0497362	0.487906
MCOLN2	27.26	0.502376	0.255796	1.96397	0.0495336	0.487906
KIAA2012	33.4774	0.436367	0.22253	1.96094	0.0498862	0.487906
IGF2R	6364.88	-0.164344	0.0837586	-1.96212	0.0497485	0.487906
KLLN	49.6132	0.306575	0.15618	1.96297	0.0496501	0.487906
PRKDC	2730.6	0.130729	0.0666142	1.96248	0.0497069	0.487906
MUSK	63.5161	0.405222	0.206716	1.96029	0.0499624	0.487957
IRAK3	467.533	0.261685	0.133462	1.96075	0.049908	0.487957
FAT4	717.749	0.221387	0.113004	1.95911	0.0501004	0.48856
ERCC6	557.341	0.160387	0.0818756	1.95891	0.0501237	0.48856
ZBTB20	5896.17	0.190668	0.0973517	1.95855	0.0501657	0.488611
RPL32	5397.12	0.389699	0.199045	1.95785	0.0502477	0.488685
NSMCE2	330.692	0.156428	0.07991	1.95755	0.0502826	0.488685
MRGPRF	156.014	0.611678	0.3124	1.958	0.0502305	0.488685
SMIM14	633.355	0.293008	0.149698	1.95734	0.0503081	0.488695
TBX6	51.9847	0.289434	0.147906	1.95688	0.050362	0.488801
TFIP11	878.326	-0.110157	0.0563269	-1.95566	0.0505047	0.488978
CENPC	382.998	0.201018	0.102789	1.95564	0.0505071	0.488978
MCU	502.381	-0.141915	0.0725473	-1.95617	0.0504447	0.488978
NRG4	51.8302	0.571272	0.292035	1.95618	0.0504444	0.488978
SLC22A2	10.2915	0.667427	0.341567	1.95401	0.0506996	0.489079
FGF7	655.413	0.306377	0.15678	1.95418	0.0506803	0.489079
PMM2	741.897	0.16353	0.0836904	1.95398	0.0507033	0.489079
OR2B11	27.269	0.506899	0.259323	1.9547	0.050618	0.489079
DYNAP	53.9918	0.359337	0.183899	1.954	0.0507017	0.489079
ZNF568	582.413	0.171986	0.0880407	1.95348	0.0507628	0.489243
TSPAN10	48.3153	0.412371	0.211226	1.95228	0.0509054	0.489929
ZNF492	28.4228	0.491289	0.251635	1.95239	0.0508918	0.489929
DAAM1	1948.73	0.190239	0.0974739	1.95169	0.0509747	0.48995
ZC3HAV1L	74.8792	0.28709	0.147105	1.9516	0.0509862	0.48995
ZBTB21	172.053	0.292868	0.15008	1.95141	0.0510079	0.489955
ATRNL1	98.0257	0.604387	0.309902	1.95025	0.0511464	0.490155
STAMBP	916.165	0.124228	0.0637041	1.95008	0.0511668	0.490155
PKIB	13.0657	0.763146	0.391474	1.94942	0.0512457	0.490155
TTPA	19.6252	0.634326	0.325422	1.94924	0.0512667	0.490155
CEP55	11.8037	0.738049	0.378424	1.95033	0.0511374	0.490155
SETMAR	253.826	0.153234	0.0786217	1.94901	0.0512947	0.490155
CITED4	737.308	-0.33241	0.17042	-1.95054	0.0511121	0.490155
DCUN1D3	416.975	0.203359	0.104334	1.94911	0.0512826	0.490155
CYB5A	1428.73	0.384492	0.197533	1.94647	0.0515982	0.491246
TAF1A	58.3245	0.29195	0.150057	1.9456	0.051703	0.491661
ANKRD36	431.972	0.252138	0.129645	1.94484	0.0517946	0.492147
ARMC8	956.799	0.176684	0.0909002	1.94371	0.0519299	0.492947
NPC1	704.737	0.166544	0.0856855	1.94366	0.0519359	0.492947
PMEL	21.0894	0.426498	0.219457	1.94342	0.0519654	0.49309
WNT9A	948.933	0.635697	0.327256	1.94251	0.0520759	0.49373
HGF	138.564	0.455399	0.234521	1.94183	0.0521581	0.493778
MYO3B	23.7816	0.491591	0.253226	1.94131	0.0522205	0.493778
LDLR	698.523	0.277532	0.14297	1.94119	0.052235	0.493778
RAD9B	56.3198	0.398737	0.205395	1.94132	0.0522192	0.493778
ZWILCH	115.509	0.299167	0.154136	1.94092	0.0522677	0.493778
AP3B2	64.8792	0.441419	0.227456	1.94067	0.0522978	0.493927
SPAST	390.841	0.191578	0.0987866	1.93931	0.0524632	0.494672
AP1S2	2444.74	-0.261842	0.135017	-1.93932	0.0524628	0.494672
LMLN	653.878	0.212183	0.109417	1.93921	0.0524754	0.494672
SZT2	3643.92	0.264152	0.136185	1.93965	0.0524222	0.494672
EPHA7	197.358	0.394725	0.203673	1.93803	0.0526198	0.495606
MED13	1112.58	0.260381	0.134378	1.93768	0.0526628	0.495742
CHTOP	2540.26	-0.132093	0.0681707	-1.93767	0.052663	0.495742
MAPK10	455.974	0.359894	0.185787	1.93713	0.0527296	0.496097
EXOSC7	609.562	-0.162243	0.0837938	-1.93621	0.0528417	0.496339
MEP1B	19.5568	0.645822	0.33347	1.93667	0.0527854	0.496339
MKLN1	1230.52	0.164511	0.0850012	1.9354	0.0529418	0.496713
ADD3	3477.26	0.189502	0.0979131	1.93541	0.0529402	0.496713
USP49	344.384	0.169329	0.0874999	1.93519	0.0529672	0.496713
BDNF	623.179	-0.435209	0.224893	-1.93518	0.0529685	0.496713
ATP1B3	748.362	0.351937	0.18218	1.93181	0.0533827	0.497011
SMPD3	121.827	0.756255	0.391286	1.93274	0.0532679	0.497011
SPOCK2	1166.86	-0.404295	0.209027	-1.93417	0.053092	0.497011
TWNK	306.009	-0.177908	0.0921522	-1.93058	0.0535346	0.497011
RGS16	208.075	0.532686	0.275553	1.93315	0.0532173	0.497011
S100A8	178.184	-0.854366	0.442335	-1.93149	0.0534227	0.497011
NFIB	6107.73	0.14875	0.0769914	1.93204	0.053355	0.497011
SCN3A	139.66	0.329175	0.170423	1.93152	0.0534188	0.497011
SFXN2	192.694	0.239133	0.123807	1.9315	0.0534208	0.497011
P2RY6	203.818	0.381699	0.19813	1.92651	0.0540412	0.497011
TMEM64	453.005	0.203793	0.10543	1.93297	0.05324	0.497011
CALN1	11.1794	0.978842	0.50683	1.9313	0.0534458	0.497011
PGPEP1L	30.9474	-0.470903	0.244416	-1.92665	0.0540238	0.497011
TMPRSS11B	10.9415	0.543272	0.280919	1.93391	0.0531242	0.497011
PRR27	11.3446	0.797963	0.413411	1.93019	0.0535828	0.497011
ZFP92	78.2918	-0.212959	0.110417	-1.92867	0.0537716	0.497011
PIWIL2	29.1684	0.49443	0.256164	1.93013	0.0535907	0.497011
MT-ND2	1.16615e+06	-0.290223	0.150443	-1.92912	0.0537159	0.497011
RANBP17	122.481	0.330842	0.171481	1.92932	0.0536907	0.497011
PITPNC1	429.258	0.208882	0.10845	1.92607	0.0540962	0.497361
CHEK2	71.1064	0.425768	0.221192	1.92488	0.0542446	0.497816
EPB41L2	3575.37	0.183399	0.0952894	1.92466	0.0542722	0.497937
CLXN	17.2143	0.482864	0.251386	1.92081	0.054756	0.498445
BARX2	13.7404	0.684649	0.356056	1.92287	0.0544965	0.498445
HEMGN	18.268	0.355914	0.185221	1.92156	0.0546612	0.498445
PLPP2	100.542	0.402944	0.209741	1.92115	0.0547127	0.498445
ABCG8	38.5024	0.435007	0.226317	1.92212	0.054591	0.498445
UBXN7	979.471	0.232801	0.121159	1.92145	0.0546755	0.498445
CDC40	666.022	0.15865	0.0824841	1.9234	0.0544296	0.498445
NPR1	1354.55	0.339106	0.176499	1.9213	0.0546943	0.498445
SMIM10L2A	210.91	-0.342704	0.178164	-1.92353	0.0544136	0.498445
TREX2	21.0434	-0.459303	0.238985	-1.92189	0.0546194	0.498445
OR8A1	114.828	0.424594	0.220999	1.92125	0.0547002	0.498445
MAP1LC3B2	43.2814	0.277903	0.144663	1.92103	0.0547273	0.498445
OR2V2	25.9914	0.493358	0.25689	1.9205	0.0547949	0.498475
CRX	27.5747	0.569569	0.296632	1.92012	0.0548424	0.49867
PCDHGB3	88.2226	0.350093	0.182408	1.91928	0.0549484	0.498684
PAPPA2	30.0112	0.699673	0.364673	1.91863	0.0550314	0.49891
TXN	452.976	0.364075	0.189737	1.91884	0.0550045	0.49891
ZNF808	445.274	0.213785	0.111424	1.91866	0.0550278	0.49891
DERA	338.552	0.157954	0.0823511	1.91805	0.0551045	0.499069
NTNG1	37.9801	0.931902	0.485992	1.91752	0.0551714	0.499185
FAM222B	973.249	-0.130574	0.0680943	-1.91754	0.0551688	0.499185
CCP110	368.677	0.16233	0.0847022	1.91648	0.0553039	0.499422
PIH1D2	32.9206	0.353666	0.184499	1.91689	0.0552514	0.499422
DNAJB14	738.187	0.199299	0.10402	1.91596	0.0553705	0.499745
AURKC	56.6748	-0.261634	0.136632	-1.91488	0.0555073	0.499874
CIDEA	70.5152	1.02408	0.534636	1.91547	0.0554327	0.499874
MRM1	234.348	-0.238813	0.124667	-1.91561	0.0554148	0.499874
ORC6	508.66	0.282857	0.147777	1.91408	0.0556097	0.499935
SLC7A2	1172.38	0.270428	0.141366	1.91297	0.0557524	0.500048
ARHGAP28	131.262	0.349313	0.182625	1.91273	0.0557824	0.500048
CTSC	1028.36	0.600795	0.3141	1.91275	0.0557798	0.500048
FYB2	853.005	-0.32229	0.16848	-1.91293	0.0557573	0.500048
HELZ	1366.27	0.199774	0.10439	1.91373	0.0556545	0.500048
CDKL2	23.0561	0.613974	0.321032	1.9125	0.0558119	0.500176
STON2	215.353	0.363607	0.190175	1.91196	0.0558815	0.500176
ILF2	1599.97	0.152167	0.0795763	1.91222	0.0558485	0.500176
IQGAP3	54.7599	0.626232	0.327608	1.91153	0.0559369	0.500176
TGFBR3	777.313	0.360509	0.188646	1.91103	0.0560003	0.500236
PLEKHA4	617.349	0.330501	0.173067	1.90967	0.056176	0.500387
ZNF888	105.156	0.214178	0.112148	1.90978	0.056162	0.500387
LTB4R	177.323	-0.282697	0.148058	-1.90936	0.0562154	0.500387
CDC42EP2	340.862	0.36516	0.191439	1.90745	0.0564624	0.501826
MT-CYB	1.8245e+06	-0.252428	0.132373	-1.90694	0.0565285	0.502284
EVI2B	148.096	-0.501905	0.263234	-1.90669	0.056561	0.502313
POLE2	31.8519	0.38281	0.200831	1.90613	0.0566336	0.502438
BAG1	1194.08	-0.158606	0.0832846	-1.90439	0.0568596	0.502748
AKAP12	1375.4	0.36877	0.193661	1.9042	0.0568837	0.502748
DCLK1	470.648	0.341122	0.179137	1.90425	0.0568776	0.502748
S1PR1	2685.62	-0.157356	0.0825773	-1.90556	0.0567069	0.502748
KIAA2026	1488.78	0.186393	0.097868	1.90454	0.0568404	0.502748
TCEAL9	665.009	0.370221	0.194433	1.90411	0.0568963	0.502748
SELE	115.292	0.807422	0.424877	1.90037	0.0573848	0.503078
FAM76A	577.827	0.123189	0.0647975	1.90114	0.0572832	0.503078
YPEL3	1374.6	-0.1782	0.0937646	-1.90051	0.0573665	0.503078
SLC41A2	80.2669	0.546142	0.286981	1.90306	0.0570332	0.503078
MTTP	114.601	0.407912	0.214643	1.90042	0.0573785	0.503078
ADCY10	15.4761	0.571015	0.300108	1.9027	0.0570794	0.503078
ZNF761	276.049	0.2008	0.105557	1.90229	0.0571334	0.503078
SBSPON	82.5741	0.491853	0.258562	1.90226	0.0571369	0.503078
TICAM2	82.4765	0.327604	0.172255	1.90185	0.0571907	0.503078
RPS6KA6	77.4342	0.547583	0.288212	1.89993	0.0574423	0.503121
HACD3	590.796	0.171283	0.0903914	1.89491	0.0581049	0.50341
RPLP0	6434.43	0.209273	0.110523	1.89349	0.0582932	0.50341
CBX5	2444.65	0.169761	0.0895171	1.89641	0.0579063	0.50341
MFNG	476.064	0.262126	0.138533	1.89215	0.0584708	0.50341
PIM2	132.459	-0.225699	0.118835	-1.89926	0.0575305	0.50341
EBI3	20.3647	0.502451	0.265143	1.89502	0.0580902	0.50341
HPS5	522.201	0.154693	0.0816354	1.89493	0.0581017	0.50341
MDFI	35.5231	0.879381	0.463888	1.89568	0.058003	0.50341
TUSC2	633.176	-0.152728	0.0804376	-1.89872	0.0576017	0.50341
INO80D	662.356	0.199634	0.105401	1.89405	0.0582183	0.50341
ABHD12B	34.9164	0.566066	0.298602	1.89572	0.0579969	0.50341
ADAMTS18	17.1014	0.952808	0.501872	1.89851	0.0576291	0.50341
DYM	1582.74	0.156856	0.0827436	1.89569	0.0580014	0.50341
POGK	989.442	-0.13264	0.0698991	-1.8976	0.0577492	0.50341
EGFR	911.911	0.304938	0.160727	1.89725	0.0577952	0.50341
MMP21	11.0766	0.483567	0.255678	1.89131	0.0585826	0.50341
ARMC3	11.2525	0.65943	0.347741	1.89632	0.0579172	0.50341
RPS7	2878.52	0.397664	0.210261	1.89129	0.0585859	0.50341
CD163	978.265	0.588399	0.31043	1.89543	0.0580355	0.50341
C3orf38	272.758	0.149692	0.0790736	1.89307	0.0583487	0.50341
KNTC1	156.935	0.280947	0.148417	1.89295	0.0583644	0.50341
TLCD2	241.711	0.311015	0.163756	1.89926	0.05753	0.50341
CYP4F8	40.5764	0.430018	0.227226	1.89246	0.0584293	0.50341
WDHD1	75.5828	0.313935	0.165325	1.8989	0.0575778	0.50341
SELENOM	370.567	0.346622	0.18273	1.8969	0.0578405	0.50341
SAMD13	29.072	0.33114	0.175022	1.89199	0.058492	0.50341
GGTA1	460.639	0.435769	0.229934	1.89519	0.0580673	0.50341
TRIM59	49.1983	0.395871	0.20888	1.8952	0.0580657	0.50341
GOLGA8B	2199.05	0.308877	0.162809	1.89717	0.0578054	0.50341
SBK3	134.752	0.438262	0.231176	1.8958	0.0579868	0.50341
NVL	313.618	0.183459	0.0970265	1.89082	0.0586486	0.503426
GLB1L3	49.7082	0.418346	0.221352	1.88996	0.0587631	0.503824
OGDHL	481.852	-0.530746	0.280829	-1.88992	0.0587682	0.503824
PRDM5	332.059	0.210524	0.111414	1.88957	0.0588157	0.503854
SLC30A8	12.3088	0.876293	0.463743	1.88961	0.0588105	0.503854
ZC3H12D	61.37	0.41158	0.217803	1.88969	0.0587999	0.503854
SUSD1	226.644	0.318701	0.168683	1.88936	0.0588442	0.50387
FAM228B	424.678	0.237091	0.125609	1.88753	0.0590884	0.504807
AGPAT4	250.429	0.260169	0.137879	1.88694	0.0591679	0.505109
ANKS4B	27.3768	0.449045	0.237989	1.88683	0.0591833	0.505115
EYA2	49.3689	0.664174	0.352057	1.88655	0.0592204	0.50518
NYAP1	14.2945	0.606451	0.321457	1.88657	0.0592181	0.50518
CHI3L2	87.7544	0.867907	0.460777	1.88357	0.0596229	0.505537
RASAL2	2220.18	0.212738	0.112888	1.88451	0.0594964	0.505537
IRF6	2033.48	-0.356253	0.189304	-1.88192	0.0598474	0.505537
RASL11A	78.827	0.392759	0.208495	1.88378	0.0595953	0.505537
RAC2	188.561	-0.5662	0.300471	-1.88437	0.0595147	0.505537
E2F8	128.954	0.300924	0.159671	1.88464	0.0594778	0.505537
POLR3F	392.465	-0.145851	0.0773721	-1.88506	0.0594214	0.505537
MYO1F	374.961	-0.35954	0.191143	-1.881	0.0599724	0.505537
RPL13A	12286.6	0.206965	0.109965	1.8821	0.0598221	0.505537
NKD2	115.486	0.328686	0.174767	1.88071	0.060011	0.505537
ENPP3	19.3177	0.440337	0.233881	1.88274	0.0597357	0.505537
LSM12	1020.92	-0.134616	0.0715761	-1.88074	0.0600075	0.505537
BOLA2B	420.077	0.555036	0.294531	1.88447	0.0595008	0.505537
ERCC6L2	721.677	0.157003	0.0833421	1.88383	0.0595877	0.505537
ANXA2	5255.5	0.419609	0.222923	1.8823	0.0597951	0.505537
DNAH2	30.7771	0.541002	0.287008	1.88498	0.0594331	0.505537
ZNF829	200.306	0.237559	0.126045	1.88471	0.0594685	0.505537
CCDC63	70.6773	0.73396	0.390337	1.88032	0.0600638	0.505848
ICAM3	248.679	-0.230087	0.122448	-1.87906	0.0602364	0.50623
MOCS3	256.164	-0.162821	0.0866521	-1.87902	0.0602416	0.50623
TMEM160	177.018	-0.264175	0.140566	-1.87936	0.0601956	0.50623
NEMP1	229.696	0.172211	0.0916393	1.87922	0.060214	0.50623
GATA4	5817.54	-0.198121	0.105467	-1.8785	0.0603123	0.506452
SMC4	789.226	0.186387	0.0992523	1.87791	0.0603934	0.506594
TMEM200C	36.7663	0.403462	0.214844	1.87793	0.0603908	0.506594
CEP350	1226.74	0.222895	0.118738	1.87719	0.0604916	0.506865
AK7	24.8845	0.509507	0.271401	1.87732	0.0604737	0.506865
RAB40A	25.6683	0.387174	0.206253	1.87717	0.0604941	0.506865
ZZZ3	954.7	0.159906	0.0852223	1.87633	0.0606094	0.507169
SREBF1	1079.12	0.323567	0.172794	1.87256	0.0611289	0.507169
CDH20	10.5788	0.512834	0.274216	1.87018	0.0614582	0.507169
ZNF174	253.221	-0.140388	0.074842	-1.87579	0.0606836	0.507169
BFSP1	31.5194	0.329404	0.175667	1.87516	0.0607709	0.507169
FGD3	266.537	-0.336123	0.179702	-1.87044	0.0614223	0.507169
SERPINF1	4182.01	0.410753	0.219681	1.86977	0.0615156	0.507169
DGKB	46.6272	0.477295	0.254762	1.87349	0.0610008	0.507169
SEMA6D	780.07	0.255293	0.136162	1.87493	0.0608027	0.507169
AP1G1	1511.67	0.165466	0.0884714	1.87028	0.0614449	0.507169
ZNF701	174.824	-0.192258	0.102545	-1.87486	0.0608113	0.507169
TANC2	499.567	0.315716	0.168495	1.87374	0.0609664	0.507169
KLF17	11.8172	0.425428	0.22708	1.87348	0.0610026	0.507169
TRAPPC3L	100.186	0.382307	0.203897	1.875	0.0607933	0.507169
TRMT12	235.365	-0.143654	0.0767282	-1.87225	0.061172	0.507169
FLRT2	521.177	0.549508	0.293571	1.87181	0.0612332	0.507169
TPK1	169.602	0.247038	0.131902	1.87289	0.0610834	0.507169
CRIP1	676.111	0.532305	0.283973	1.87449	0.0608626	0.507169
TUBGCP5	663.383	0.146196	0.0779921	1.8745	0.060862	0.507169
SLC30A2	674.11	-0.404512	0.21638	-1.86945	0.06156	0.507387
COLEC12	1048.66	0.397783	0.212803	1.86925	0.0615874	0.50749
CNGB1	28.288	0.557075	0.298115	1.86866	0.0616702	0.507749
TMEM156	24.1054	0.539833	0.289079	1.86742	0.0618427	0.508088
WDFY3	1314.2	0.21774	0.116623	1.86705	0.0618945	0.508088
LCTL	18.7382	0.494423	0.26488	1.86659	0.0619584	0.508088
AARD	15.1818	0.535809	0.286941	1.86731	0.0618576	0.508088
SDHAF1	153.306	-0.16911	0.0905565	-1.86745	0.0618382	0.508088
UHRF1	50.2677	0.39099	0.209522	1.8661	0.0620275	0.508366
ZNF100	235.487	0.287082	0.153877	1.86567	0.0620881	0.508448
FCN1	236.534	-0.469817	0.251891	-1.86516	0.062159	0.508665
GSTCD	161.748	0.213209	0.114322	1.86498	0.0621837	0.508746
DRP2	15.5301	0.630442	0.338123	1.86454	0.0622463	0.508999
RFX7	352.191	0.269735	0.144673	1.86445	0.062259	0.508999
GXYLT2	306.376	0.306635	0.164487	1.86419	0.0622946	0.509169
MGAT3	338.308	0.301735	0.161923	1.86345	0.0623988	0.509497
ERN2	12.9453	0.5769	0.309646	1.8631	0.0624486	0.509497
KIF27	130.522	0.265358	0.142522	1.86187	0.0626211	0.509574
RAPH1	688.951	0.26478	0.142166	1.86246	0.0625376	0.509574
PEAK1	3494.53	0.215873	0.115936	1.86201	0.0626018	0.509574
ZNF713	151.772	0.277557	0.149029	1.86244	0.0625416	0.509574
LRCH3	1511.86	0.143323	0.0769826	1.86175	0.0626377	0.509574
AFDN	3304.77	0.20128	0.108135	1.86138	0.0626898	0.509811
SLC38A2	3125.92	0.230407	0.123787	1.86132	0.0626994	0.509811
MSR1	166.173	0.50612	0.272031	1.86052	0.0628114	0.510141
TNFRSF12A	1511.93	-0.438503	0.23573	-1.86019	0.0628586	0.510381
MAB21L3	990.179	0.354911	0.190816	1.85996	0.0628909	0.510402
HSCB	132.418	0.208912	0.112344	1.85958	0.0629443	0.510474
CELSR3	60.7286	0.325281	0.175038	1.85835	0.0631198	0.510682
INTS2	458.109	0.228505	0.123012	1.85758	0.0632293	0.510682
SPOP	1295.39	0.0911601	0.0490405	1.85887	0.0630453	0.510682
LIN28A	25.7273	0.433401	0.233374	1.85711	0.0632951	0.510682
PAQR5	80.0969	0.439376	0.236568	1.85729	0.0632699	0.510682
C1QTNF2	108.06	0.256758	0.13814	1.85868	0.063073	0.510682
AP3S2	1695.52	0.204104	0.109928	1.8567	0.0633533	0.510682
ESCO2	31.1254	0.457824	0.246526	1.8571	0.0632965	0.510682
OR8G1	16.3869	0.517357	0.278665	1.85656	0.0633741	0.510682
ATL1	211.777	0.307922	0.165939	1.85564	0.0635047	0.510682
HOXB7	24.1742	-0.579864	0.312403	-1.85614	0.0634337	0.510682
ZNF114	33.746	0.427389	0.23037	1.85523	0.0635635	0.511035
CSNK2A2	872.505	-0.126925	0.0684849	-1.85333	0.0638348	0.511051
PSEN1	1170.23	0.141727	0.0764433	1.85401	0.0637375	0.511051
RPL34	3479	0.293543	0.158288	1.85448	0.06367	0.511051
EHBP1	670.899	0.199564	0.107618	1.85437	0.0636866	0.511051
ZHX1	933.589	0.164514	0.0887959	1.85272	0.0639222	0.511051
RPS17	5800.55	0.334028	0.180284	1.85278	0.0639138	0.511051
ERC2	36.4662	-0.393201	0.21225	-1.85254	0.0639483	0.511051
ARPC4-TTLL3	72.8125	-0.278947	0.15049	-1.85359	0.0637983	0.511051
FBXO17	154.216	0.30972	0.167162	1.85281	0.0639094	0.511051
NR0B2	155.463	-0.328929	0.17764	-1.85166	0.0640751	0.511559
CDC20B	22.8796	0.477301	0.257819	1.8513	0.0641266	0.511732
SCN4A	200.578	-0.619845	0.334915	-1.85075	0.0642049	0.511883
MS4A1	11.4861	-0.93221	0.50367	-1.85083	0.0641935	0.511883
SSTR2	184.637	0.291215	0.157325	1.85104	0.0641644	0.511883
TAF2	706.863	0.198871	0.107716	1.84626	0.0648544	0.51219
GRK7	18.1555	0.481782	0.260904	1.84659	0.064807	0.51219
CREB1	946.182	0.204998	0.110821	1.84982	0.0643398	0.51219
PLAAT1	91.4876	-0.280729	0.15184	-1.84885	0.0644791	0.51219
LOXL1	996.555	0.352195	0.190619	1.84764	0.0646541	0.51219
PKNOX1	364.12	0.204699	0.110819	1.84715	0.0647255	0.51219
KLHL21	5755.72	-0.259761	0.140516	-1.84862	0.0645125	0.51219
HHIP	61.2539	0.411073	0.222235	1.84972	0.0643538	0.51219
PLD5	30.3053	0.551894	0.298898	1.84643	0.06483	0.51219
ZNF93	127.187	0.243109	0.131508	1.84863	0.0645113	0.51219
PDZD7	43.375	0.338175	0.182789	1.85008	0.0643013	0.51219
MITF	2595.4	0.205351	0.111135	1.84777	0.0646363	0.51219
AKR1C1	468.588	0.487427	0.263588	1.8492	0.0644285	0.51219
SMG1	2912.24	0.182484	0.0989055	1.84504	0.0650323	0.51309
SEC23B	355.907	0.215878	0.117026	1.8447	0.0650806	0.513181
SYT17	85.711	0.32217	0.174671	1.84444	0.0651191	0.51322
NDC80	33.9711	0.460777	0.250013	1.84301	0.0653275	0.513656
NCOR1	3665.75	0.0975205	0.0528971	1.84359	0.0652433	0.513656
WWC2	1140.59	0.201257	0.109223	1.84263	0.0653836	0.513656
GIGYF2	3113.74	0.178231	0.0967058	1.84302	0.0653262	0.513656
STK4	587.652	0.242788	0.131817	1.84186	0.0654962	0.514188
IL6ST	5076.04	0.273631	0.148559	1.8419	0.0654895	0.514188
UBE2C	11.8375	0.811125	0.440476	1.84147	0.0655523	0.514511
CLNK	19.0421	0.525273	0.285336	1.84089	0.0656373	0.514656
BCL2L15	76.8892	0.411471	0.223643	1.83986	0.0657892	0.514842
ACP6	524.737	-0.244206	0.132747	-1.83963	0.0658225	0.514986
ALDH8A1	28.9184	0.473151	0.257305	1.83887	0.0659338	0.515619
CD160	27.9277	0.423675	0.230491	1.83814	0.0660418	0.515905
FBXO36	73.133	0.260992	0.141989	1.83812	0.066045	0.515905
INIP	714.844	0.194607	0.105899	1.83767	0.0661116	0.516307
OPN4	66.3258	0.42367	0.230818	1.83552	0.0664291	0.517085
RSPRY1	690.087	0.172385	0.0939162	1.83552	0.066428	0.517085
CDCP1	61.3891	0.609128	0.331949	1.83501	0.0665045	0.51726
C7orf25	51.7414	0.376588	0.205261	1.83468	0.0665534	0.517308
CA12	100.402	0.948555	0.517719	1.83218	0.0669243	0.518299
USP33	1169.19	0.145555	0.0794116	1.83292	0.0668144	0.518299
CNTRL	394.602	0.19229	0.104932	1.83252	0.0668737	0.518299
CERCAM	590.727	0.426531	0.232778	1.83235	0.0668992	0.518299
ENSG00000275778	96.4032	-0.299399	0.163595	-1.83012	0.067232	0.520329
NR3C1	1803.05	0.197513	0.107982	1.82912	0.0673816	0.520733
PTCH2	151.14	0.312305	0.170734	1.82919	0.067371	0.520733
OR8D1	16.3547	0.601591	0.329002	1.82853	0.0674694	0.520759
PUS7	195.793	0.243466	0.133185	1.82803	0.0675449	0.520992
RAB34	410.592	0.339118	0.185509	1.82804	0.0675437	0.520992
QSER1	611.474	0.217962	0.119452	1.82469	0.0680479	0.52123
CDH7	40.8142	0.511737	0.280051	1.8273	0.0676546	0.52123
RALGPS2	265.385	0.271992	0.148907	1.82658	0.0677624	0.52123
HABP4	1044.5	-0.132212	0.0723744	-1.82678	0.067733	0.52123
L3MBTL4	76.203	0.369653	0.202562	1.82489	0.068018	0.52123
ANKFY1	1899.44	0.152054	0.0833014	1.82534	0.0679493	0.52123
S100A10	1434.06	0.392326	0.215028	1.82453	0.0680714	0.52123
TIGD1	308.898	0.252409	0.138233	1.82596	0.0678562	0.52123
TWIST2	33.9313	0.674546	0.369671	1.82472	0.0680432	0.52123
CCDC171	116.202	0.305932	0.167747	1.82377	0.0681873	0.521693
SPATA7	178.463	0.192231	0.1056	1.82037	0.0687033	0.522198
ADAM28	96.1365	0.401321	0.220454	1.82043	0.0686942	0.522198
PDE1A	448.553	0.357563	0.196157	1.82284	0.0683271	0.522198
TNFRSF11A	60.9467	0.506778	0.278223	1.82148	0.068534	0.522198
PRIM2	119.766	0.292595	0.160607	1.82181	0.0684844	0.522198
ROM1	41.6085	-0.35921	0.197329	-1.82036	0.0687039	0.522198
BMP3	10.0335	0.780522	0.428554	1.82129	0.0685625	0.522198
CLIC2	438.566	0.272375	0.149503	1.82187	0.0684743	0.522198
DDX10	475.064	0.170356	0.0935014	1.82196	0.0684604	0.522198
TMEM102	48.5046	-0.28705	0.157548	-1.82198	0.0684579	0.522198
MC2R	19.3349	0.50148	0.2753	1.82158	0.0685191	0.522198
MYO5A	650.106	0.251389	0.138033	1.82122	0.0685732	0.522198
RPS12	4847.57	0.324207	0.178151	1.81984	0.0687837	0.522458
DACT2	133.943	0.564709	0.310353	1.81957	0.0688247	0.522506
LYNX1-SLURP2	63.2263	0.482649	0.26531	1.81919	0.0688827	0.522631
TNIP3	16.068	0.512175	0.281694	1.8182	0.0690338	0.522698
RPL22	7204.23	0.435705	0.239617	1.81834	0.0690119	0.522698
LSM7	399.934	0.291554	0.160305	1.81875	0.0689498	0.522698
TMEM132B	89.0621	0.403999	0.222253	1.81774	0.0691035	0.522698
TRIM44	3659.2	0.230446	0.126783	1.81764	0.0691193	0.522698
TMEM135	507.234	0.227375	0.12506	1.81813	0.069044	0.522698
POLR2L	4525.91	0.513274	0.282285	1.81828	0.0690216	0.522698
ALG11	856.174	0.255683	0.140643	1.81795	0.0690713	0.522698
EFNB2	1360.71	-0.21196	0.116627	-1.81743	0.069152	0.52283
NEK1	774.489	0.137914	0.0759091	1.81684	0.069242	0.522935
MYO15A	81.0335	0.281403	0.154964	1.81593	0.0693816	0.523185
SPCS2	1858.99	0.241627	0.133038	1.81622	0.0693367	0.523185
ARSI	19.657	0.59159	0.325762	1.81602	0.0693678	0.523185
MARVELD3	34.3928	0.433112	0.238658	1.81479	0.0695569	0.523646
TPSAB1	139.533	0.565371	0.311583	1.81451	0.0695992	0.523666
BNC2	263.021	0.449026	0.247505	1.81421	0.0696454	0.523666
TUBAL3	14.6281	0.523507	0.288573	1.81412	0.0696587	0.523666
LRRC57	695.803	0.159769	0.0880644	1.81422	0.0696431	0.523666
SCEL	11.263	1.26579	0.697828	1.8139	0.0696924	0.523691
CUZD1	11.2439	0.46051	0.253912	1.81366	0.0697297	0.523748
GET1	397.784	0.150909	0.0832071	1.81366	0.0697305	0.523748
OLFM2	89.8041	0.364269	0.200995	1.81233	0.0699353	0.524612
HCST	91.4661	0.647864	0.357432	1.81255	0.0699009	0.524612
NTRK2	634.153	0.469164	0.259015	1.81134	0.0700884	0.525357
SLC38A9	234.068	0.206313	0.113911	1.81118	0.0701128	0.525357
LONRF3	53.4897	-0.330963	0.182797	-1.81055	0.0702109	0.525405
[truncated: 14,114 more rows]

## Sheet: Supplementary Table 5
Supplementary Table 5. GO enrichment analysis for human RNA-seq study.
[truncated: 143 more rows]

[truncated: 2 more sheets: Supplementary Table 6, Supplementary Table 7]
